# Supplementary material for: Evaluation of highly conserved Burkholderia pseudomallei outer membrane proteins as protective antigens against respiratory melioidosis
Source: NPJ Vaccines. 2025 Aug 6;10:186. doi: 10.1038/s41541-025-01246-2 (PMC12328632; doi:10.1038/s41541-025-01246-2)
Supplement: Supplementary file 2 — Supplementary Data 1 [file 41541_2025_1246_MOESM2_ESM.xlsx]

## Sheet: PSORTb
SeqID	ID	Localization	Score
BPSL0001 ref|YP_106626.1|gi|53717640| carboxylate-amine ligase	BPSL0001	Cytoplasmic	9.97
BPSL0003 ref|YP_106628.2|gi|161723216| 5-methylaminomethyl-2-thiouridine methyltransferase	BPSL0003	Cytoplasmic	9.97
BPSL0004 ref|YP_106629.1|gi|53717643| DNA-binding protein HU-alpha	BPSL0004	Cytoplasmic	9.26
BPSL0005 ref|YP_106630.1|gi|53717644| cobalamin synthesis protein/P47K	BPSL0005	Cytoplasmic	9.97
BPSL0008 ref|YP_106633.1|gi|53717647| general secretory pathway protein E	BPSL0008	Cytoplasmic	9.97
BPSL0016 ref|YP_106641.1|gi|53717655| general secretory pathway protein L	BPSL0016	Cytoplasmic	8.96
BPSL0021 ref|YP_106646.1|gi|53717660| MarR family transcriptional regulator	BPSL0021	Cytoplasmic	9.26
BPSL0023 ref|YP_106648.1|gi|53717662| LysR family transcriptional regulator	BPSL0023	Cytoplasmic	9.97
BPSL0033 ref|YP_106658.1|gi|53717672| MerR family transcriptional regulator	BPSL0033	Cytoplasmic	9.26
BPSL0040 ref|YP_106665.1|gi|53717679| response regulator protein	BPSL0040	Cytoplasmic	9.97
BPSL0043 ref|YP_106668.1|gi|53717682| type III restriction system endonuclease	BPSL0043	Cytoplasmic	8.96
BPSL0045 ref|YP_106670.1|gi|53717684| AraC family transcriptional regulator	BPSL0045	Cytoplasmic	9.26
BPSL0047 ref|YP_106672.1|gi|53717686| ABC transport system ATP-binding protein	BPSL0047	Cytoplasmic	9.12
BPSL0051 ref|YP_106676.1|gi|53717690| phenylacetaldehyde dehydrogenase	BPSL0051	Cytoplasmic	9.97
BPSL0052 ref|YP_106677.1|gi|53717691| hypothetical protein	BPSL0052	Cytoplasmic	9.26
BPSL0053 ref|YP_106678.1|gi|53717692| hypothetical protein	BPSL0053	Cytoplasmic	9.26
BPSL0054 ref|YP_106679.1|gi|53717693| short chain dehydrogenase	BPSL0054	Cytoplasmic	9.26
BPSL0059 ref|YP_106684.1|gi|53717698| hypothetical protein	BPSL0059	Cytoplasmic	8.96
BPSL0060 ref|YP_106685.1|gi|53717699| AraC family transcriptional regulator	BPSL0060	Cytoplasmic	9.26
BPSL0061 ref|YP_106686.1|gi|53717700| acyl-CoA dehydrogenase	BPSL0061	Cytoplasmic	9.97
BPSL0062 ref|YP_106687.1|gi|53717701| acetyl-CoA acetyltransferase	BPSL0062	Cytoplasmic	9.97
BPSL0063 ref|YP_106688.1|gi|53717702| fatty oxidation complex subunit alpha	BPSL0063	Cytoplasmic	9.97
BPSL0064 ref|YP_106689.1|gi|53717703| alpha-methylacyl-CoA racemase	BPSL0064	Cytoplasmic	9.97
BPSL0073 ref|YP_106698.1|gi|53717712| DNA gyrase subunit B	BPSL0073	Cytoplasmic	9.97
BPSL0074 ref|YP_106699.1|gi|53717713| DNA polymerase III subunit beta	BPSL0074	Cytoplasmic	9.97
BPSL0075 ref|YP_106700.1|gi|53717714| chromosomal replication initiation protein	BPSL0075	Cytoplasmic	9.97
BPSL0075a ref|YP_106701.1|gi|53717715| 50S ribosomal protein L34	BPSL0075a	Cytoplasmic	9.26
BPSL0080 ref|YP_106706.1|gi|53717720| tRNA modification GTPase TrmE	BPSL0080	Cytoplasmic	9.12
BPSL0081 ref|YP_106707.1|gi|53717721| phage integrase	BPSL0081	Cytoplasmic	8.96
BPSL0087 ref|YP_106713.1|gi|53717727| DNA-binding protein	BPSL0087	Cytoplasmic	8.96
BPSL0088 ref|YP_106714.1|gi|53717728| hypothetical protein	BPSL0088	Cytoplasmic	8.96
BPSL0089 ref|YP_106715.1|gi|53717729| hypothetical protein	BPSL0089	Cytoplasmic	8.96
BPSL0090 ref|YP_106716.1|gi|53717730| transposase	BPSL0090	Cytoplasmic	9.97
BPSL0091 ref|YP_106717.1|gi|53717731| transposase	BPSL0091	Cytoplasmic	9.26
BPSL0096 ref|YP_106722.1|gi|53717736| spermidine n(1)-acetyltransferase	BPSL0096	Cytoplasmic	9.97
BPSL0098 ref|YP_106724.1|gi|53717738| hypothetical protein	BPSL0098	Cytoplasmic	9.26
BPSL0099 ref|YP_106725.1|gi|53717739| glyoxalase/bleomycin resistance protein/dioxygenase superfamily protein	BPSL0099	Cytoplasmic	9.97
BPSL0100 ref|YP_106726.1|gi|53717740| O6-methylguanine-DNA methyltransferase	BPSL0100	Cytoplasmic	9.26
BPSL0101 ref|YP_106727.1|gi|53717741| DNA-3-methyladenine glycosylase II	BPSL0101	Cytoplasmic	8.96
BPSL0102 ref|YP_106728.1|gi|53717742| glutamate--cysteine ligase	BPSL0102	Cytoplasmic	9.26
BPSL0103 ref|YP_106729.1|gi|53717743| RNA polymerase sigma factor	BPSL0103	Cytoplasmic	9.97
BPSL0104 ref|YP_106730.1|gi|53717744| hypothetical protein	BPSL0104	Cytoplasmic	8.96
BPSL0107 ref|YP_106733.1|gi|53717747| LysR family transcriptional regulator	BPSL0107	Cytoplasmic	9.97
BPSL0109 ref|YP_106735.1|gi|53717749| histone deacetylase	BPSL0109	Cytoplasmic	9.97
BPSL0110 ref|YP_106736.1|gi|53717750| carbon-nitrogen hydrolase	BPSL0110	Cytoplasmic	9.26
BPSL0114 ref|YP_106741.1|gi|53717755| hypothetical protein	BPSL0114	Cytoplasmic	9.26
BPSL0115 ref|YP_106742.1|gi|53717756| patatin-like phospholipase	BPSL0115	Cytoplasmic	8.96
BPSL0116 ref|YP_106743.1|gi|53717757| D-isomer specific 2-hydroxyacid dehydrogenase	BPSL0116	Cytoplasmic	9.97
BPSL0117 ref|YP_106744.1|gi|53717758| LysR family transcriptional regulator	BPSL0117	Cytoplasmic	9.97
BPSL0118 ref|YP_106745.1|gi|53717759| DNA topoisomerase III	BPSL0118	Cytoplasmic	9.97
BPSL0121 ref|YP_106748.1|gi|53717762| peptide deformylase	BPSL0121	Cytoplasmic	9.97
BPSL0122 ref|YP_106749.1|gi|53717763| methionyl-tRNA formyltransferase	BPSL0122	Cytoplasmic	9.97
BPSL0128 ref|YP_106755.1|gi|53717769| response regulator protein	BPSL0128	Cytoplasmic	9.97
BPSL0129 ref|YP_106756.1|gi|53717770| prophage integrase	BPSL0129	Cytoplasmic	9.26
BPSL0130 ref|YP_106757.1|gi|53717771| hypothetical protein	BPSL0130	Cytoplasmic	8.96
BPSL0143 ref|YP_106771.1|gi|53717785| hypothetical protein	BPSL0143	Cytoplasmic	8.96
BPSL0144 ref|YP_106772.1|gi|53717786| hypothetical protein	BPSL0144	Cytoplasmic	8.96
BPSL0149 ref|YP_106777.1|gi|53717791| phage major tail tube protein	BPSL0149	Cytoplasmic	8.96
BPSL0153 ref|YP_106781.1|gi|53717795| hypothetical protein	BPSL0153	Cytoplasmic	9.97
BPSL0154 ref|YP_106782.1|gi|53717796| phage baseplate assembly protein	BPSL0154	Cytoplasmic	8.96
BPSL0159 ref|YP_106787.1|gi|53717801| phage tail completion protein	BPSL0159	Cytoplasmic	8.96
BPSL0163 ref|YP_106791.1|gi|53717805| phage-encoded peptidoglycan binding protein	BPSL0163	Cytoplasmic	8.96
BPSL0170 ref|YP_106798.1|gi|53717812| phage major capsid protein	BPSL0170	Cytoplasmic	8.96
BPSL0171 ref|YP_106799.1|gi|53717813| phage capsid scaffolding protein	BPSL0171	Cytoplasmic	8.96
BPSL0172 ref|YP_106800.1|gi|53717814| phage terminase, ATPase subunit	BPSL0172	Cytoplasmic	8.96
BPSL0177 ref|YP_106805.1|gi|53717819| hypothetical protein	BPSL0177	Cytoplasmic	8.96
BPSL0178 ref|YP_106806.1|gi|53717820| hypothetical protein	BPSL0178	Cytoplasmic	9.26
BPSL0179 ref|YP_106807.1|gi|53717821| 6-pyruvoyl tetrahydrobiopterin synthase	BPSL0179	Cytoplasmic	8.96
BPSL0180 ref|YP_106808.1|gi|53717822| HpcH/HpaI aldolase	BPSL0180	Cytoplasmic	9.97
BPSL0186 ref|YP_106814.1|gi|53717828| rod shape-determining protein MreB	BPSL0186	Cytoplasmic	9.97
BPSL0187 ref|YP_106815.1|gi|53717829| aspartyl/glutamyl-tRNA amidotransferase subunit C	BPSL0187	Cytoplasmic	9.97
BPSL0188 ref|YP_106816.1|gi|53717830| aspartyl/glutamyl-tRNA amidotransferase subunit A	BPSL0188	Cytoplasmic	9.97
BPSL0189 ref|YP_106817.1|gi|53717831| aspartyl/glutamyl-tRNA amidotransferase subunit B	BPSL0189	Cytoplasmic	8.96
BPSL0190 ref|YP_106818.1|gi|53717832| hypothetical protein	BPSL0190	Cytoplasmic	9.97
BPSL0191 ref|YP_106819.1|gi|53717833| hypothetical protein	BPSL0191	Cytoplasmic	9.97
BPSL0192 ref|YP_106820.1|gi|53717834| NADP-dependent alcohol dehydrogenase	BPSL0192	Cytoplasmic	9.97
BPSL0193 ref|YP_106821.1|gi|53717835| AraC family transcriptional regulator	BPSL0193	Cytoplasmic	9.26
BPSL0196 ref|YP_106824.1|gi|53717838| hypothetical protein	BPSL0196	Cytoplasmic	9.26
BPSL0197 ref|YP_106825.1|gi|53717839| homoserine O-acetyltransferase	BPSL0197	Cytoplasmic	9.97
BPSL0198 ref|YP_106826.1|gi|53717840| nucleoid occlusion protein	BPSL0198	Cytoplasmic	9.26
BPSL0199 ref|YP_106827.1|gi|53717841| haloacid dehalogenase	BPSL0199	Cytoplasmic	8.96
BPSL0200 ref|YP_106828.1|gi|53717842| acetylglutamate kinase	BPSL0200	Cytoplasmic	9.97
BPSL0202 ref|YP_106830.1|gi|53717844| response regulator protein	BPSL0202	Cytoplasmic	9.97
BPSL0203 ref|YP_106831.1|gi|53717845| ATP-dependent protease ATP-binding subunit HslU	BPSL0203	Cytoplasmic	9.97
BPSL0204 ref|YP_106832.1|gi|53717846| ATP-dependent protease peptidase subunit	BPSL0204	Cytoplasmic	9.97
BPSL0205 ref|YP_106833.1|gi|53717847| dksA/traR C4-type zinc finger family protein	BPSL0205	Cytoplasmic	9.97
BPSL0206 ref|YP_106834.1|gi|53717848| hypothetical protein	BPSL0206	Cytoplasmic	9.97
BPSL0207 ref|YP_106835.1|gi|53717849| hypothetical protein	BPSL0207	Cytoplasmic	9.97
BPSL0208 ref|YP_106836.1|gi|53717850| site-specific tyrosine recombinase XerC	BPSL0208	Cytoplasmic	9.97
BPSL0210 ref|YP_106838.1|gi|53717852| diaminopimelate epimerase	BPSL0210	Cytoplasmic	9.97
BPSL0212 ref|YP_106840.1|gi|53717854| S-adenosylmethionine synthetase	BPSL0212	Cytoplasmic	9.97
BPSL0215 ref|YP_106844.1|gi|53717858| aldo/keto reductase	BPSL0215	Cytoplasmic	9.97
BPSL0220 ref|YP_106849.1|gi|53717863| serine/threonine protein kinase	BPSL0220	Cytoplasmic	9.97
BPSL0222 ref|YP_106850.1|gi|53717864| coniferyl aldehyde dehydrogenase	BPSL0222	Cytoplasmic	9.97
BPSL0223 ref|YP_106851.1|gi|53717865| acyl-CoA dehydrogenase	BPSL0223	Cytoplasmic	9.97
BPSL0226 ref|YP_106854.1|gi|53717868| flagellar fliJ protein	BPSL0226	Cytoplasmic	9.26
BPSL0227 ref|YP_106855.1|gi|53717869| flagellum-specific ATP synthase	BPSL0227	Cytoplasmic	9.12
BPSL0228 ref|YP_106856.1|gi|53717870| flagellar assembly protein H	BPSL0228	Cytoplasmic	9.97
BPSL0229 ref|YP_106857.1|gi|53717871| flagellar motor switch protein G	BPSL0229	Cytoplasmic	9.12
BPSL0232 ref|YP_106860.1|gi|53717874| flagellar protein	BPSL0232	Cytoplasmic	9.26
BPSL0237 ref|YP_106865.1|gi|53717879| hypothetical protein	BPSL0237	Cytoplasmic	9.97
BPSL0239 ref|YP_106867.1|gi|53717881| response regulator protein	BPSL0239	Cytoplasmic	9.97
BPSL0241 ref|YP_106868.1|gi|53717882| ferredoxin-NADP reductase	BPSL0241	Cytoplasmic	9.97
BPSL0243 ref|YP_106870.1|gi|53717884| hypothetical protein	BPSL0243	Cytoplasmic	9.26
BPSL0245 ref|YP_106872.1|gi|53717886| ATPase	BPSL0245	Cytoplasmic	9.97
BPSL0246 ref|YP_106873.1|gi|53717887| FAD dependent oxidoreductase	BPSL0246	Cytoplasmic	9.97
BPSL0257 ref|YP_106884.1|gi|53717898| LamB/YcsF family protein	BPSL0257	Cytoplasmic	8.96
BPSL0258 ref|YP_106885.1|gi|53717899| hypothetical protein	BPSL0258	Cytoplasmic	9.26
BPSL0259 ref|YP_106886.1|gi|53717900| hypothetical protein	BPSL0259	Cytoplasmic	9.26
BPSL0260 ref|YP_106887.1|gi|53717901| hypothetical protein	BPSL0260	Cytoplasmic	8.96
BPSL0263 ref|YP_106890.1|gi|53717904| hypothetical protein	BPSL0263	Cytoplasmic	8.96
BPSL0265 ref|YP_106892.1|gi|53717906| multifunctional tRNA nucleotidyl transferase/2'3'-cyclic phosphodiesterase/2'nucleotidase/phosphatase	BPSL0265	Cytoplasmic	9.97
BPSL0283 ref|YP_106910.1|gi|53717924| DNA-binding transcriptional activator GcvA	BPSL0283	Cytoplasmic	9.26
BPSL0297 ref|YP_106924.1|gi|53717938| glutathione reductase	BPSL0297	Cytoplasmic	9.97
BPSL0298 ref|YP_106925.1|gi|53717939| argininosuccinate synthase	BPSL0298	Cytoplasmic	9.97
BPSL0305 ref|YP_106932.1|gi|53717946| hypothetical protein	BPSL0305	Cytoplasmic	8.96
BPSL0312 ref|YP_106939.1|gi|53717953| glucosamine--fructose-6-phosphate aminotransferase	BPSL0312	Cytoplasmic	9.97
BPSL0313 ref|YP_106940.1|gi|53717954| bifunctional glmU protein	BPSL0313	Cytoplasmic	9.97
BPSL0314 ref|YP_106941.1|gi|53717955| C32 tRNA thiolase	BPSL0314	Cytoplasmic	9.97
BPSL0315 ref|YP_106942.1|gi|53717956| hypothetical protein	BPSL0315	Cytoplasmic	8.96
BPSL0322 ref|YP_106949.1|gi|53717963| LacI family regulatory protein	BPSL0322	Cytoplasmic	9.26
BPSL0327 ref|YP_106954.1|gi|53717968| LysR family transcriptional regulator	BPSL0327	Cytoplasmic	9.97
BPSL0328 ref|YP_106955.1|gi|53717969| 2-nitropropane dioxygenase	BPSL0328	Cytoplasmic	9.97
BPSL0330 ref|YP_106957.1|gi|53717971| transcription regulator AsnC	BPSL0330	Cytoplasmic	9.97
BPSL0332 ref|YP_106959.1|gi|53717973| hypothetical protein	BPSL0332	Cytoplasmic	9.97
BPSL0333 ref|YP_106960.1|gi|53717974| hydroxymethylglutaryl-CoA lyase	BPSL0333	Cytoplasmic	9.97
BPSL0334 ref|YP_106961.1|gi|53717975| hypothetical protein	BPSL0334	Cytoplasmic	9.97
BPSL0337 ref|YP_106964.1|gi|53717978| MutT/NUDIX family protein	BPSL0337	Cytoplasmic	8.96
BPSL0340 ref|YP_106967.1|gi|53717981| transcription regulator AsnC	BPSL0340	Cytoplasmic	9.97
BPSL0343 ref|YP_106970.1|gi|53717984| hydrolase	BPSL0343	Cytoplasmic	8.96
BPSL0346 ref|YP_106973.1|gi|53717987| dihydrodipicolinate synthetase	BPSL0346	Cytoplasmic	9.26
BPSL0350 ref|YP_106977.1|gi|53717991| Fis family transcriptional regulator	BPSL0350	Cytoplasmic	9.97
BPSL0363 ref|YP_106989.1|gi|53718003| CutC family protein	BPSL0363	Cytoplasmic	8.96
BPSL0364 ref|YP_106990.1|gi|53718004| biotin synthase	BPSL0364	Cytoplasmic	9.97
BPSL0365 ref|YP_106991.1|gi|53718005| dithiobiotin synthetase	BPSL0365	Cytoplasmic	9.26
BPSL0366 ref|YP_106992.1|gi|53718006| 8-amino-7-oxononanoate synthase	BPSL0366	Cytoplasmic	9.26
BPSL0367 ref|YP_106993.1|gi|53718007| adenosylmethionine-8-amino-7-oxononanoate aminotransferase	BPSL0367	Cytoplasmic	9.97
BPSL0372 ref|YP_106998.1|gi|53718012| carbonic anhydrase	BPSL0372	Cytoplasmic	9.97
BPSL0373 ref|YP_106999.1|gi|53718013| bifunctional isocitrate dehydrogenase kinase/phosphatase	BPSL0373	Cytoplasmic	9.97
BPSL0374 ref|YP_107000.1|gi|53718014| metallo-beta-lactamase superfamily protein	BPSL0374	Cytoplasmic	8.96
BPSL0375 ref|YP_107001.1|gi|53718015| ABC transport system ATP-binding protein	BPSL0375	Cytoplasmic	9.97
BPSL0377 ref|YP_107003.1|gi|53718017| hypothetical protein	BPSL0377	Cytoplasmic	9.26
BPSL0378 ref|YP_107004.1|gi|53718018| MarR family transcriptional regulator	BPSL0378	Cytoplasmic	9.26
BPSL0379 ref|YP_107005.1|gi|53718019| short chain dehydrogenase	BPSL0379	Cytoplasmic	9.26
BPSL0380 ref|YP_107006.1|gi|53718020| short chain dehydrogenase	BPSL0380	Cytoplasmic	9.26
BPSL0383 ref|YP_107009.1|gi|53718023| arginyl-tRNA synthetase	BPSL0383	Cytoplasmic	9.97
BPSL0385 ref|YP_107011.1|gi|53718025| 5-methyltetrahydrofolate--homocysteine methyltransferase	BPSL0385	Cytoplasmic	9.97
BPSL0386 ref|YP_107012.1|gi|53718026| 5-methyltetrahydrofolate--homocysteine methyltransferase	BPSL0386	Cytoplasmic	9.26
BPSL0389 ref|YP_107015.1|gi|53718029| IclR family transcriptional regulator	BPSL0389	Cytoplasmic	9.26
BPSL0390 ref|YP_107016.1|gi|53718030| fumarylacetoacetate (FAA) hydrolase	BPSL0390	Cytoplasmic	8.96
BPSL0391 ref|YP_107017.1|gi|53718031| enoyl-CoA hydratase	BPSL0391	Cytoplasmic	9.97
BPSL0393 ref|YP_107019.1|gi|53718033| patatin-like phospholipase	BPSL0393	Cytoplasmic	8.96
BPSL0394 ref|YP_107020.1|gi|53718034| hypothetical protein	BPSL0394	Cytoplasmic	8.96
BPSL0395 ref|YP_107021.1|gi|53718035| cytidylyltransferase	BPSL0395	Cytoplasmic	9.26
BPSL0397 ref|YP_107023.1|gi|53718037| pantothenate kinase	BPSL0397	Cytoplasmic	9.26
BPSL0398 ref|YP_107024.1|gi|53718038| biotin--protein ligase	BPSL0398	Cytoplasmic	9.97
BPSL0406 ref|YP_107032.1|gi|53718046| ferredoxin	BPSL0406	Cytoplasmic	8.96
BPSL0409 ref|YP_107035.1|gi|53718049| D-amino acid aminotransferase	BPSL0409	Cytoplasmic	9.97
BPSL0410 ref|YP_107036.1|gi|53718050| hypothetical protein	BPSL0410	Cytoplasmic	8.96
BPSL0411 ref|YP_107037.1|gi|53718051| DNA-binding transcriptional activator GcvA	BPSL0411	Cytoplasmic	9.97
BPSL0413 ref|YP_107039.2|gi|161723211| lipoate-protein ligase B	BPSL0413	Cytoplasmic	9.97
BPSL0414 ref|YP_107040.1|gi|53718054| lipoyl synthase	BPSL0414	Cytoplasmic	9.97
BPSL0418 ref|YP_107043.1|gi|53718057| LysR family transcriptional regulator	BPSL0418	Cytoplasmic	9.97
BPSL0419 ref|YP_107044.1|gi|53718058| trifunctional enoyl-CoA hydratase/3,2-trans-enoyl-CoA isomerase/3-hydroxyacyl-CoA dehydrogenase	BPSL0419	Cytoplasmic	9.97
BPSL0420 ref|YP_107045.1|gi|53718059| hypothetical protein	BPSL0420	Cytoplasmic	9.26
BPSL0421 ref|YP_107046.1|gi|53718060| hypothetical protein	BPSL0421	Cytoplasmic	9.97
BPSL0422 ref|YP_107047.1|gi|53718061| CAIB/BAIF family protein	BPSL0422	Cytoplasmic	9.97
BPSL0427 ref|YP_107052.1|gi|53718066| C4-dicarboxylate transport transcriptional regulatory protein	BPSL0427	Cytoplasmic	9.97
BPSL0430 ref|YP_107055.1|gi|53718069| thioesterase	BPSL0430	Cytoplasmic	9.26
BPSL0432 ref|YP_107057.1|gi|53718071| magnesium chelatase subunit	BPSL0432	Cytoplasmic	9.97
BPSL0436 ref|YP_107061.1|gi|53718075| glutamate--cysteine ligase	BPSL0436	Cytoplasmic	8.96
BPSL0437 ref|YP_107062.1|gi|53718076| glutathione synthetase	BPSL0437	Cytoplasmic	9.97
BPSL0439 ref|YP_107064.1|gi|53718078| phosphocarrier protein HPr	BPSL0439	Cytoplasmic	9.26
BPSL0440 ref|YP_107065.1|gi|53718079| phosphoenolpyruvate-protein phosphotransferase	BPSL0440	Cytoplasmic	9.97
BPSL0441 ref|YP_107066.1|gi|53718080| molybdopterin biosynthesis protein MoeB	BPSL0441	Cytoplasmic	9.97
BPSL0443 ref|YP_107068.1|gi|53718082| phosphoglyceromutase	BPSL0443	Cytoplasmic	8.96
BPSL0445 ref|YP_107070.1|gi|53718084| glutaredoxin 3	BPSL0445	Cytoplasmic	8.96
BPSL0446 ref|YP_107071.1|gi|53718085| preprotein translocase subunit SecB	BPSL0446	Cytoplasmic	9.97
BPSL0450 ref|YP_107075.1|gi|53718089| hypothetical protein	BPSL0450	Cytoplasmic	9.26
BPSL0451 ref|YP_107076.1|gi|53718090| hypothetical protein	BPSL0451	Cytoplasmic	8.96
BPSL0471 ref|YP_107096.1|gi|53718110| hypothetical protein	BPSL0471	Cytoplasmic	9.97
BPSL0472 ref|YP_107097.1|gi|53718111| error-prone DNA polymerase	BPSL0472	Cytoplasmic	9.97
BPSL0473 ref|YP_107098.1|gi|53718112| hypothetical protein	BPSL0473	Cytoplasmic	8.96
BPSL0476 ref|YP_107101.1|gi|53718115| diaminobutyrate--2-oxoglutarate aminotransferase	BPSL0476	Cytoplasmic	9.97
BPSL0479 ref|YP_107104.1|gi|53718118| ABC transport system ATP-binding protein	BPSL0479	Cytoplasmic	9.12
BPSL0480 ref|YP_107105.1|gi|53718119| hypothetical protein	BPSL0480	Cytoplasmic	9.97
BPSL0481 ref|YP_107106.1|gi|53718120| hypothetical protein	BPSL0481	Cytoplasmic	8.96
BPSL0483 ref|YP_107108.1|gi|53718122| hypothetical protein	BPSL0483	Cytoplasmic	9.97
BPSL0486 ref|YP_107111.1|gi|53718125| pyridoxal-dependent decarboxylase	BPSL0486	Cytoplasmic	8.96
BPSL0488 ref|YP_107113.1|gi|53718127| hypothetical protein	BPSL0488	Cytoplasmic	8.96
BPSL0490 ref|YP_107115.1|gi|53718129| hypothetical protein	BPSL0490	Cytoplasmic	8.96
BPSL0492 ref|YP_107117.1|gi|53718131| hypothetical protein	BPSL0492	Cytoplasmic	8.96
BPSL0493 ref|YP_107118.1|gi|53718132| AMP-binding enzyme	BPSL0493	Cytoplasmic	9.26
BPSL0494 ref|YP_107119.1|gi|53718133| LysR family transcriptional regulator	BPSL0494	Cytoplasmic	9.97
BPSL0495 ref|YP_107120.1|gi|53718134| GntR family transcriptional regulator	BPSL0495	Cytoplasmic	9.26
BPSL0496 ref|YP_107121.1|gi|53718135| N-acetylglucosamine-6-phosphate deacetylase	BPSL0496	Cytoplasmic	9.97
BPSL0497 ref|YP_107122.1|gi|53718136| phosphosugar-binding protein	BPSL0497	Cytoplasmic	9.26
BPSL0498 ref|YP_107123.1|gi|53718137| multiphosphoryl transfer protein	BPSL0498	Cytoplasmic	9.97
BPSL0504 ref|YP_107130.1|gi|53718144| RNA polymerase factor sigma-32	BPSL0504	Cytoplasmic	9.26
BPSL0507 ref|YP_107133.1|gi|53718147| 2-isopropylmalate synthase	BPSL0507	Cytoplasmic	8.96
BPSL0509 ref|YP_107135.1|gi|53718149| glycosyl transferase	BPSL0509	Cytoplasmic	9.97
BPSL0510 ref|YP_107136.1|gi|53718150| nitrate reductase	BPSL0510	Cytoplasmic	9.26
BPSL0512 ref|YP_107138.1|gi|53718152| nitrite reductase	BPSL0512	Cytoplasmic	9.97
BPSL0513 ref|YP_107139.1|gi|53718153| maleylacetoacetate isomerase	BPSL0513	Cytoplasmic	9.97
BPSL0515 ref|YP_107141.1|gi|53718155| hypothetical protein	BPSL0515	Cytoplasmic	8.96
BPSL0516 ref|YP_107142.1|gi|53718156| phosphopantetheine adenylyltransferase	BPSL0516	Cytoplasmic	9.26
BPSL0518 ref|YP_107144.1|gi|53718158| histidinol-phosphate aminotransferase	BPSL0518	Cytoplasmic	9.97
BPSL0519 ref|YP_107145.1|gi|53718159| peptidyl-tRNA hydrolase	BPSL0519	Cytoplasmic	9.97
BPSL0520 ref|YP_107146.2|gi|161723210| 50S ribosomal protein L25	BPSL0520	Cytoplasmic	9.97
BPSL0521 ref|YP_107147.1|gi|53718161| ribose-phosphate pyrophosphokinase	BPSL0521	Cytoplasmic	9.97
BPSL0526 ref|YP_107151.1|gi|53718165| formamidopyrimidine-DNA glycosylase	BPSL0526	Cytoplasmic	9.97
BPSL0527 ref|YP_107152.1|gi|53718166| A/G-specific adenine glycosylase	BPSL0527	Cytoplasmic	9.97
BPSL0528 ref|YP_107153.1|gi|53718167| hypothetical protein	BPSL0528	Cytoplasmic	9.97
BPSL0530 ref|YP_107155.1|gi|53718169| HPr kinase/phosphorylase	BPSL0530	Cytoplasmic	8.96
BPSL0532 ref|YP_107157.1|gi|53718171| PTS system, EIIA component	BPSL0532	Cytoplasmic	9.97
BPSL0533 ref|YP_107158.1|gi|53718172| RNA polymerase factor sigma-54	BPSL0533	Cytoplasmic	9.97
BPSL0534 ref|YP_107159.1|gi|53718173| ABC transporter ATP-binding protein	BPSL0534	Cytoplasmic	9.12
BPSL0537 ref|YP_107162.1|gi|53718176| hypothetical protein	BPSL0537	Cytoplasmic	9.97
BPSL0538 ref|YP_107163.1|gi|53718177| hypothetical protein	BPSL0538	Cytoplasmic	8.96
BPSL0540 ref|YP_107165.1|gi|53718179| adenine phosphoribosyltransferase	BPSL0540	Cytoplasmic	10
BPSL0542 ref|YP_107167.1|gi|53718181| NUDIX domain-containing protein	BPSL0542	Cytoplasmic	8.96
BPSL0543 ref|YP_107168.1|gi|53718182| formyltetrahydrofolate deformylase	BPSL0543	Cytoplasmic	9.97
BPSL0545 ref|YP_107170.1|gi|53718184| excinuclease ABC subunit A	BPSL0545	Cytoplasmic	9.97
BPSL0547 ref|YP_107172.1|gi|53718186| single-stranded DNA-binding protein	BPSL0547	Cytoplasmic	9.26
BPSL0549A ref|YP_107174.1|gi|53718188| DNA-binding protein	BPSL0549A	Cytoplasmic	8.96
BPSL0551 ref|YP_107176.1|gi|53718190| hypothetical protein	BPSL0551	Cytoplasmic	8.96
BPSL0564 ref|YP_107190.1|gi|53718204| hypothetical protein	BPSL0564	Cytoplasmic	8.96
BPSL0566 ref|YP_107192.1|gi|53718206| hypothetical protein	BPSL0566	Cytoplasmic	8.96
BPSL0567 ref|YP_107193.1|gi|53718207| hypothetical protein	BPSL0567	Cytoplasmic	8.96
BPSL0568 ref|YP_107194.1|gi|53718208| hypothetical protein	BPSL0568	Cytoplasmic	8.96
BPSL0572 ref|YP_107198.1|gi|53718212| hypothetical protein	BPSL0572	Cytoplasmic	8.96
BPSL0574B ref|YP_107202.1|gi|53718216| hypothetical protein	BPSL0574B	Cytoplasmic	8.96
BPSL0575 ref|YP_107203.1|gi|53718217| hypothetical protein	BPSL0575	Cytoplasmic	8.96
BPSL0577 ref|YP_107205.1|gi|53718219| phage integrase	BPSL0577	Cytoplasmic	8.96
BPSL0578 ref|YP_107206.1|gi|53718220| dienelactone hydrolase	BPSL0578	Cytoplasmic	8.96
BPSL0582 ref|YP_107210.1|gi|53718224| hypothetical protein	BPSL0582	Cytoplasmic	8.96
BPSL0583 ref|YP_107211.1|gi|53718225| hypothetical protein	BPSL0583	Cytoplasmic	8.96
BPSL0586a ref|YP_107215.1|gi|53718229| hypothetical protein	BPSL0586a	Cytoplasmic	8.96
BPSL0587 ref|YP_107216.1|gi|53718230| phage integrase	BPSL0587	Cytoplasmic	8.96
BPSL0596 ref|YP_107225.1|gi|53718239| DNA-binding protein	BPSL0596	Cytoplasmic	8.96
BPSL0600 ref|YP_107229.1|gi|53718243| hypothetical protein	BPSL0600	Cytoplasmic	8.96
BPSL0601 ref|YP_107230.1|gi|53718244| aldolase	BPSL0601	Cytoplasmic	9.97
BPSL0604 ref|YP_107233.1|gi|53718247| glycosyl transferase	BPSL0604	Cytoplasmic	8.96
BPSL0605 ref|YP_107234.1|gi|53718248| mannose-1-phosphate guanylyltransferase	BPSL0605	Cytoplasmic	8.96
BPSL0606 ref|YP_107235.1|gi|53718249| hypothetical protein	BPSL0606	Cytoplasmic	9.97
BPSL0607 ref|YP_107236.1|gi|53718250| glycosyl transferase	BPSL0607	Cytoplasmic	8.96
BPSL0609 ref|YP_107238.1|gi|53718252| Fis family transcriptional regulator	BPSL0609	Cytoplasmic	9.97
BPSL0610 ref|YP_107239.1|gi|53718253| hypothetical protein	BPSL0610	Cytoplasmic	8.96
BPSL0611 ref|YP_107240.1|gi|53718254| glycosyl hydrolase	BPSL0611	Cytoplasmic	8.96
BPSL0612 ref|YP_107241.1|gi|53718255| hypothetical protein	BPSL0612	Cytoplasmic	8.96
BPSL0613 ref|YP_107242.1|gi|53718256| hypothetical protein	BPSL0613	Cytoplasmic	8.96
BPSL0614 ref|YP_107243.1|gi|53718257| acyl-CoA dehydrogenase	BPSL0614	Cytoplasmic	8.96
BPSL0616 ref|YP_107245.1|gi|53718259| hypothetical protein	BPSL0616	Cytoplasmic	8.96
BPSL0617 ref|YP_107246.1|gi|53718260| hypothetical protein	BPSL0617	Cytoplasmic	8.96
BPSL0620 ref|YP_107249.1|gi|53718263| group 1 glycosyl transferase	BPSL0620	Cytoplasmic	9.26
BPSL0623 ref|YP_107252.1|gi|53718266| hydrolase	BPSL0623	Cytoplasmic	9.26
BPSL0626 ref|YP_107255.1|gi|53718269| MarR family transcriptional regulator	BPSL0626	Cytoplasmic	8.96
BPSL0627 ref|YP_107256.1|gi|53718270| peptidase	BPSL0627	Cytoplasmic	9.97
BPSL0628 ref|YP_107257.1|gi|53718271| hypothetical protein	BPSL0628	Cytoplasmic	8.96
BPSL0629 ref|YP_107258.1|gi|53718272| transcriptional regulator	BPSL0629	Cytoplasmic	9.26
BPSL0630 ref|YP_107259.1|gi|53718273| D-aminoacylase	BPSL0630	Cytoplasmic	9.97
BPSL0631 ref|YP_107260.1|gi|53718274| hypothetical protein	BPSL0631	Cytoplasmic	9.26
BPSL0632 ref|YP_107261.1|gi|53718275| 7-cyano-7-deazaguanine reductase	BPSL0632	Cytoplasmic	9.26
BPSL0633 ref|YP_107262.1|gi|53718276| threonine dehydratase	BPSL0633	Cytoplasmic	9.97
BPSL0634 ref|YP_107263.1|gi|53718277| oxidoreductase	BPSL0634	Cytoplasmic	9.97
BPSL0635 ref|YP_107264.1|gi|53718278| hypothetical protein	BPSL0635	Cytoplasmic	8.96
BPSL0637 ref|YP_107266.1|gi|53718280| ubiquinone/menaquinone biosynthesis methyltransferase	BPSL0637	Cytoplasmic	9.97
BPSL0639 ref|YP_107268.1|gi|53718282| hypothetical protein	BPSL0639	Cytoplasmic	8.96
BPSL0644 ref|YP_107273.1|gi|53718287| aspartyl-tRNA synthetase	BPSL0644	Cytoplasmic	10
BPSL0647 ref|YP_107276.1|gi|53718290| TetR family regulatory protein	BPSL0647	Cytoplasmic	8.96
BPSL0648 ref|YP_107277.1|gi|53718291| acyl-CoA dehydrogenase oxidoreductase	BPSL0648	Cytoplasmic	9.97
BPSL0649 ref|YP_107278.1|gi|53718292| 3-hydroxyacyl-CoA dehydrogenase oxidoreductase	BPSL0649	Cytoplasmic	9.97
BPSL0650 ref|YP_107279.1|gi|53718293| acetyl-CoA acetyltransferase	BPSL0650	Cytoplasmic	9.97
BPSL0652 ref|YP_107281.1|gi|53718295| formate dehydrogenase subunit delta	BPSL0652	Cytoplasmic	9.97
BPSL0656 ref|YP_107285.1|gi|53718299| nucleotidyl transferase	BPSL0656	Cytoplasmic	9.97
BPSL0657 ref|YP_107286.1|gi|53718300| hypothetical protein	BPSL0657	Cytoplasmic	8.96
BPSL0660 ref|YP_107289.1|gi|53718303| 4-hydroxythreonine-4-phosphate dehydrogenase	BPSL0660	Cytoplasmic	9.97
BPSL0661 ref|YP_107290.1|gi|53718304| dimethyladenosine transferase	BPSL0661	Cytoplasmic	9.97
BPSL0663 ref|YP_107292.1|gi|53718306| lactoylglutathione lyase	BPSL0663	Cytoplasmic	9.97
BPSL0666 ref|YP_107295.1|gi|53718309| D,D-heptose 1,7-bisphosphate phosphatase	BPSL0666	Cytoplasmic	9.97
BPSL0667 ref|YP_107296.1|gi|53718310| glycyl-tRNA synthetase subunit beta	BPSL0667	Cytoplasmic	9.97
BPSL0668 ref|YP_107297.1|gi|53718311| glycyl-tRNA synthetase subunit alpha	BPSL0668	Cytoplasmic	9.97
BPSL0672 ref|YP_107301.2|gi|229269498| unkown domain/ metalloprotease fusion protein	BPSL0672	Cytoplasmic	9.97
BPSL0673 ref|YP_107302.1|gi|53718316| PhoH-family protein	BPSL0673	Cytoplasmic	9.97
BPSL0674 ref|YP_107303.1|gi|53718317| (dimethylallyl)adenosine tRNA methylthiotransferase	BPSL0674	Cytoplasmic	9.97
BPSL0675 ref|YP_107304.1|gi|53718318| LysR family transcriptional regulator	BPSL0675	Cytoplasmic	9.97
BPSL0677 ref|YP_107306.1|gi|53718320| DNA binding protein	BPSL0677	Cytoplasmic	9.97
BPSL0678 ref|YP_107307.1|gi|53718321| 3,4-dihydroxy-2-butanone 4-phosphate synthase	BPSL0678	Cytoplasmic	9.97
BPSL0679 ref|YP_107308.1|gi|53718322| hydrolase	BPSL0679	Cytoplasmic	9.97
BPSL0681 ref|YP_107310.1|gi|53718324| hypothetical protein	BPSL0681	Cytoplasmic	8.96
BPSL0682 ref|YP_107311.1|gi|53718325| asparagine synthetase B	BPSL0682	Cytoplasmic	9.97
BPSL0683 ref|YP_107312.1|gi|53718326| 3-phosphoshikimate 1-carboxyvinyltransferase	BPSL0683	Cytoplasmic	8.96
BPSL0685 ref|YP_107314.1|gi|53718328| hypothetical protein	BPSL0685	Cytoplasmic	8.96
BPSL0687 ref|YP_107316.1|gi|53718330| glycerol kinase	BPSL0687	Cytoplasmic	9.26
BPSL0688 ref|YP_107317.1|gi|53718331| glycerol-3-phosphate dehydrogenase	BPSL0688	Cytoplasmic	9.97
BPSL0691 ref|YP_107320.1|gi|53718334| DeoR family glycerol-3-phosphate regulon repressor	BPSL0691	Cytoplasmic	9.97
BPSL0693 ref|YP_107322.1|gi|53718336| hypothetical protein	BPSL0693	Cytoplasmic	8.96
BPSL0695 ref|YP_107324.1|gi|53718338| ATP-dependent RNA helicase 1	BPSL0695	Cytoplasmic	9.26
BPSL0699 ref|YP_107328.1|gi|53718342| galactonate dehydratase	BPSL0699	Cytoplasmic	8.96
BPSL0700 ref|YP_107329.1|gi|53718343| hypothetical protein	BPSL0700	Cytoplasmic	8.96
BPSL0704 ref|YP_107333.1|gi|53718347| two-component response regulator protein	BPSL0704	Cytoplasmic	9.97
BPSL0709 ref|YP_107337.1|gi|53718351| LysR family transcriptional regulator	BPSL0709	Cytoplasmic	9.97
BPSL0710 ref|YP_107338.1|gi|53718352| tRNA 2-selenouridine synthase	BPSL0710	Cytoplasmic	8.96
BPSL0717 ref|YP_107343.1|gi|53718357| nicotinate phosphoribosyltransferase	BPSL0717	Cytoplasmic	8.96
BPSL0718 ref|YP_107344.1|gi|53718358| phosphoribosyl transferase	BPSL0718	Cytoplasmic	8.96
BPSL0725 ref|YP_107351.1|gi|53718365| mandelate racemase	BPSL0725	Cytoplasmic	8.96
BPSL0728 ref|YP_107354.1|gi|53718368| glucose dehydrogenase	BPSL0728	Cytoplasmic	8.96
BPSL0729 ref|YP_107355.1|gi|53718369| hypothetical protein	BPSL0729	Cytoplasmic	8.96
BPSL0731 ref|YP_107357.1|gi|53718371| LysR family transcriptional regulator	BPSL0731	Cytoplasmic	9.97
BPSL0734 ref|YP_107360.1|gi|53718374| two-component transcriptional response regulator	BPSL0734	Cytoplasmic	8.96
BPSL0736 ref|YP_107362.1|gi|53718376| hypothetical protein	BPSL0736	Cytoplasmic	8.96
BPSL0738 ref|YP_107364.1|gi|53718378| hypothetical protein	BPSL0738	Cytoplasmic	8.96
BPSL0744 ref|YP_107370.1|gi|53718384| phage-related integrase	BPSL0744	Cytoplasmic	8.96
BPSL0745 ref|YP_107371.1|gi|53718385| hypothetical protein	BPSL0745	Cytoplasmic	8.96
BPSL0747a ref|YP_107374.1|gi|53718388| hypothetical protein	BPSL0747a	Cytoplasmic	8.96
BPSL0748 ref|YP_107375.1|gi|53718389| hypothetical protein	BPSL0748	Cytoplasmic	8.96
BPSL0750 ref|YP_107377.1|gi|53718391| hypothetical protein	BPSL0750	Cytoplasmic	8.96
BPSL0752 ref|YP_107379.1|gi|53718393| hypothetical protein	BPSL0752	Cytoplasmic	8.96
BPSL0753 ref|YP_107380.1|gi|53718394| hypothetical protein	BPSL0753	Cytoplasmic	8.96
BPSL0757 ref|YP_107382.1|gi|53718396| hypothetical protein	BPSL0757	Cytoplasmic	8.96
BPSL0758 ref|YP_107383.1|gi|53718397| phosphoesterase	BPSL0758	Cytoplasmic	8.96
BPSL0763 ref|YP_107388.1|gi|53718402| helicase SNF2 family protein	BPSL0763	Cytoplasmic	9.26
BPSL0764 ref|YP_107389.1|gi|53718403| hypothetical protein	BPSL0764	Cytoplasmic	8.96
BPSL0766 ref|YP_107391.1|gi|53718405| hypothetical protein	BPSL0766	Cytoplasmic	8.96
BPSL0768 ref|YP_107393.1|gi|53718407| hypothetical protein	BPSL0768	Cytoplasmic	8.96
BPSL0770 ref|YP_107395.1|gi|53718409| hypothetical protein	BPSL0770	Cytoplasmic	8.96
BPSL0772 ref|YP_107397.1|gi|53718411| phage integrase	BPSL0772	Cytoplasmic	8.96
BPSL0775 ref|YP_107400.1|gi|53718414| response regulator transcription regulatory protein	BPSL0775	Cytoplasmic	9.97
BPSL0776 ref|YP_107401.1|gi|53718415| recombinase A	BPSL0776	Cytoplasmic	9.97
BPSL0777 ref|YP_107402.1|gi|53718416| recombination regulator RecX	BPSL0777	Cytoplasmic	9.26
BPSL0778 ref|YP_107403.1|gi|53718417| hypothetical protein	BPSL0778	Cytoplasmic	8.96
BPSL0779 ref|YP_107404.1|gi|53718418| succinyl-CoA synthetase subunit beta	BPSL0779	Cytoplasmic	8.96
BPSL0780 ref|YP_107405.1|gi|53718419| succinyl-CoA synthetase subunit alpha	BPSL0780	Cytoplasmic	9.97
BPSL0786 ref|YP_107411.1|gi|53718425| molybdenum cofactor biosynthesis protein MoaC	BPSL0786	Cytoplasmic	9.97
BPSL0791 ref|YP_107416.1|gi|53718430| ADP-heptose--LPS heptosyltransferase II	BPSL0791	Cytoplasmic	9.97
BPSL0793 ref|YP_107418.1|gi|53718432| branched-chain amino acid aminotransferase	BPSL0793	Cytoplasmic	9.97
BPSL0796 ref|YP_107421.1|gi|53718435| phosphoglycerate kinase	BPSL0796	Cytoplasmic	9.97
BPSL0797 ref|YP_107422.1|gi|53718436| pyruvate kinase	BPSL0797	Cytoplasmic	9.97
BPSL0798 ref|YP_107423.1|gi|53718437| fructose-1,6-bisphosphate aldolase	BPSL0798	Cytoplasmic	9.97
BPSL0799 ref|YP_107424.1|gi|53718438| phosphoribosylaminoimidazole-succinocarboxamide synthase	BPSL0799	Cytoplasmic	8.96
BPSL0802 ref|YP_107427.1|gi|53718441| hypothetical protein	BPSL0802	Cytoplasmic	8.96
BPSL0806 ref|YP_107431.1|gi|53718445| response regulator protein	BPSL0806	Cytoplasmic	9.97
BPSL0812 ref|YP_107437.1|gi|53718451| TetR family regulatory protein	BPSL0812	Cytoplasmic	9.97
BPSL0818 ref|YP_107442.1|gi|53718456| sugar kinase	BPSL0818	Cytoplasmic	9.26
BPSL0819 ref|YP_107443.1|gi|53718457| AraC family transcriptional regulator	BPSL0819	Cytoplasmic	8.96
BPSL0820 ref|YP_107444.1|gi|53718458| glutathione-dependent formaldehyde dehydrogenase	BPSL0820	Cytoplasmic	9.97
BPSL0825 ref|YP_107449.1|gi|53718463| FUR family transcriptional regulator	BPSL0825	Cytoplasmic	9.97
BPSL0826 ref|YP_107450.1|gi|53718464| sorbitol dehydrogenase	BPSL0826	Cytoplasmic	9.97
BPSL0827 ref|YP_107451.1|gi|53718465| fructokinase	BPSL0827	Cytoplasmic	8.96
BPSL0828 ref|YP_107452.1|gi|53718466| tagatose 6-phosphate kinase	BPSL0828	Cytoplasmic	8.96
BPSL0832 ref|YP_107456.1|gi|53718470| haloacid dehalogenase hydrolase	BPSL0832	Cytoplasmic	9.97
BPSL0838 ref|YP_107462.1|gi|53718476| transcriptional regulator	BPSL0838	Cytoplasmic	8.96
BPSL0839 ref|YP_107463.1|gi|53718477| carbohydrate kinase	BPSL0839	Cytoplasmic	9.26
BPSL0840 ref|YP_107464.1|gi|53718478| D-arabinitol 4-dehydrogenase	BPSL0840	Cytoplasmic	9.97
BPSL0841 ref|YP_107465.1|gi|53718479| LysR family transcriptional regulator	BPSL0841	Cytoplasmic	9.97
BPSL0842 ref|YP_107466.1|gi|53718480| benzoylformate decarboxylase	BPSL0842	Cytoplasmic	9.97
BPSL0843 ref|YP_107467.1|gi|53718481| aldehyde dehydrogenase	BPSL0843	Cytoplasmic	9.26
BPSL0844 ref|YP_107468.1|gi|53718482| ketopantoate reductase	BPSL0844	Cytoplasmic	9.97
BPSL0846 ref|YP_107471.1|gi|53718485| tryptophan 2,3-dioxygenase	BPSL0846	Cytoplasmic	9.97
BPSL0847 ref|YP_107472.1|gi|53718486| hypothetical protein	BPSL0847	Cytoplasmic	9.97
BPSL0848 ref|YP_107473.1|gi|53718487| hypothetical protein	BPSL0848	Cytoplasmic	8.96
BPSL0849 ref|YP_107474.1|gi|53718488| transcription regulator AsnC	BPSL0849	Cytoplasmic	9.97
BPSL0851 ref|YP_107476.1|gi|53718490| peptide methionine sulfoxide reductase	BPSL0851	Cytoplasmic	8.96
BPSL0853 ref|YP_107478.1|gi|53718492| cyclopropane-fatty-acyl-phospholipid synthase	BPSL0853	Cytoplasmic	9.97
BPSL0854 ref|YP_107479.2|gi|161723209| pyridoxamine 5'-phosphate oxidase	BPSL0854	Cytoplasmic	9.97
BPSL0855 ref|YP_107480.1|gi|53718494| ThiF family protein	BPSL0855	Cytoplasmic	9.97
BPSL0856 ref|YP_107481.1|gi|53718495| thioredoxin protein	BPSL0856	Cytoplasmic	9.97
BPSL0857 ref|YP_107482.1|gi|53718496| hypothetical protein	BPSL0857	Cytoplasmic	9.26
BPSL0860 ref|YP_107485.1|gi|53718499| hydrolase	BPSL0860	Cytoplasmic	9.26
BPSL0861 ref|YP_107486.1|gi|53718500| 4Fe-4S cluster-binding ferredoxin protein	BPSL0861	Cytoplasmic	8.96
BPSL0862 ref|YP_107487.1|gi|53718501| methylated-DNA--protein-cysteine methyltransferase	BPSL0862	Cytoplasmic	9.26
BPSL0863 ref|YP_107488.2|gi|161723208| site-specific tyrosine recombinase XerD	BPSL0863	Cytoplasmic	9.97
BPSL0864 ref|YP_107489.1|gi|53718503| AMP-binding enzyme	BPSL0864	Cytoplasmic	9.97
BPSL0865 ref|YP_107490.1|gi|53718504| hypothetical protein	BPSL0865	Cytoplasmic	9.26
BPSL0867 ref|YP_107492.1|gi|53718506| nucleotide-binding protein	BPSL0867	Cytoplasmic	9.97
BPSL0868 ref|YP_107493.1|gi|53718507| UDP-N-acetylenolpyruvoylglucosamine reductase	BPSL0868	Cytoplasmic	9.97
BPSL0869 ref|YP_107494.1|gi|53718508| ornithine carbamoyltransferase	BPSL0869	Cytoplasmic	9.97
BPSL0871 ref|YP_107496.1|gi|53718510| 30S ribosomal protein S20	BPSL0871	Cytoplasmic	9.26
BPSL0873 ref|YP_107498.1|gi|53718512| hypothetical protein	BPSL0873	Cytoplasmic	8.96
BPSL0874 ref|YP_107499.1|gi|53718513| short-chain dehydrogenase	BPSL0874	Cytoplasmic	9.26
BPSL0875 ref|YP_107500.1|gi|53718514| adenylate kinase	BPSL0875	Cytoplasmic	9.97
BPSL0876 ref|YP_107501.2|gi|161723207| 3-deoxy-manno-octulosonate cytidylyltransferase	BPSL0876	Cytoplasmic	9.97
BPSL0879 ref|YP_107504.1|gi|53718518| exodeoxyribonuclease VII large subunit	BPSL0879	Cytoplasmic	9.97
BPSL0883 ref|YP_107508.1|gi|53718522| regulatory protein	BPSL0883	Cytoplasmic	9.97
BPSL0885 ref|YP_107510.1|gi|53718524| 2-dehydropantoate 2-reductase	BPSL0885	Cytoplasmic	8.96
BPSL0886 ref|YP_107511.1|gi|53718525| hypothetical protein	BPSL0886	Cytoplasmic	8.96
BPSL0887 ref|YP_107512.1|gi|53718526| hypothetical protein	BPSL0887	Cytoplasmic	8.96
BPSL0890 ref|YP_107515.1|gi|53718529| citrate synthase	BPSL0890	Cytoplasmic	9.26
BPSL0891 ref|YP_107516.1|gi|53718530| GntR family transcriptional regulator	BPSL0891	Cytoplasmic	9.97
BPSL0892 ref|YP_107517.1|gi|53718531| aldo/keto reductase	BPSL0892	Cytoplasmic	9.97
BPSL0893 ref|YP_107519.1|gi|53718533| elongation factor G	BPSL0893	Cytoplasmic	9.97
BPSL0895 ref|YP_107521.1|gi|53718535| pseudouridine synthase	BPSL0895	Cytoplasmic	9.97
BPSL0898 ref|YP_107524.1|gi|53718538| cold shock-like protein	BPSL0898	Cytoplasmic	9.26
BPSL0898a ref|YP_107525.1|gi|53718539| ATP-dependent Clp protease adaptor protein ClpS	BPSL0898a	Cytoplasmic	9.26
BPSL0899 ref|YP_107526.1|gi|53718540| ATP-dependent Clp protease ATP-binding subunit	BPSL0899	Cytoplasmic	9.97
BPSL0904 ref|YP_107531.1|gi|53718545| bifunctional phosphopantothenoylcysteine decarboxylase/phosphopantothenate synthase	BPSL0904	Cytoplasmic	9.97
BPSL0906 ref|YP_107533.1|gi|53718547| isoleucyl-tRNA synthetase	BPSL0906	Cytoplasmic	9.97
BPSL0907 ref|YP_107534.1|gi|53718548| bifunctional riboflavin kinase/FMN adenylyltransferase	BPSL0907	Cytoplasmic	9.97
BPSL0908 ref|YP_107535.1|gi|53718549| phosphoribosylglycinamide formyltransferase	BPSL0908	Cytoplasmic	9.97
BPSL0909 ref|YP_107536.1|gi|53718550| NOL1/NOP2/Sun family protein	BPSL0909	Cytoplasmic	9.97
BPSL0912 ref|YP_107539.1|gi|53718553| quinolinate synthetase	BPSL0912	Cytoplasmic	9.97
BPSL0913 ref|YP_107540.1|gi|53718554| nicotinate-nucleotide pyrophosphorylase	BPSL0913	Cytoplasmic	8.96
BPSL0914 ref|YP_107541.1|gi|53718555| L-aspartate oxidase	BPSL0914	Cytoplasmic	9.97
BPSL0915 ref|YP_107542.1|gi|53718556| 50S ribosomal protein L33	BPSL0915	Cytoplasmic	9.26
BPSL0916 ref|YP_107543.1|gi|53718557| 50S ribosomal protein L28	BPSL0916	Cytoplasmic	9.26
BPSL0917 ref|YP_107544.1|gi|53718558| DNA repair protein RadC	BPSL0917	Cytoplasmic	9.26
BPSL0918 ref|YP_107545.1|gi|53718559| FkpB-type peptidyl-prolyl cis-trans isomerase	BPSL0918	Cytoplasmic	8.96
BPSL0919 ref|YP_107546.1|gi|53718560| 4-hydroxy-3-methylbut-2-enyl diphosphate reductase	BPSL0919	Cytoplasmic	9.97
BPSL0922 ref|YP_107550.1|gi|53718564| ABC transporter ATP-binding protein	BPSL0922	Cytoplasmic	9.12
BPSL0923 ref|YP_107551.1|gi|53718565| ATP-binding ABC transporter protein	BPSL0923	Cytoplasmic	9.12
BPSL0926 ref|YP_107554.1|gi|53718568| acetylornithine transaminase	BPSL0926	Cytoplasmic	9.97
BPSL0927 ref|YP_107555.1|gi|53718569| CDP-6-deoxy-delta-3,4-glucoseen reductase	BPSL0927	Cytoplasmic	9.97
BPSL0928 ref|YP_107556.1|gi|53718570| hypothetical protein	BPSL0928	Cytoplasmic	8.96
BPSL0930 ref|YP_107558.1|gi|53718572| ribosomal small subunit pseudouridine synthase A	BPSL0930	Cytoplasmic	9.97
BPSL0932 ref|YP_107560.1|gi|53718574| LysR family transcriptional regulator	BPSL0932	Cytoplasmic	9.97
BPSL0933 ref|YP_107561.1|gi|53718575| LysR family transcriptional regulator	BPSL0933	Cytoplasmic	9.97
BPSL0935 ref|YP_107563.1|gi|53718577| hypothetical protein	BPSL0935	Cytoplasmic	8.96
BPSL0936 ref|YP_107564.1|gi|53718578| dihydrodipicolinate synthetase	BPSL0936	Cytoplasmic	9.97
BPSL0937 ref|YP_107565.1|gi|53718579| class II aldolase/adducin domain-containing protein	BPSL0937	Cytoplasmic	9.97
BPSL0938 ref|YP_107566.1|gi|53718580| DNA-binding protein	BPSL0938	Cytoplasmic	9.97
BPSL0939 ref|YP_107568.1|gi|53718582| DeoR family regulatory protein	BPSL0939	Cytoplasmic	8.96
BPSL0942 ref|YP_107571.1|gi|53718585| hypothetical protein	BPSL0942	Cytoplasmic	8.96
BPSL0943 ref|YP_107572.1|gi|53718586| insertion element protein	BPSL0943	Cytoplasmic	9.97
BPSL0945 ref|YP_107574.1|gi|53718588| hypothetical protein	BPSL0945	Cytoplasmic	8.96
BPSL0946 ref|YP_107575.1|gi|53718589| hypothetical protein	BPSL0946	Cytoplasmic	8.96
BPSL0947 ref|YP_107576.1|gi|53718590| type I restriction enzyme specificity protein	BPSL0947	Cytoplasmic	9.26
BPSL0948 ref|YP_107577.1|gi|53718591| type I restriction-modification methylase	BPSL0948	Cytoplasmic	8.96
BPSL0950 ref|YP_107579.1|gi|53718593| hypothetical protein	BPSL0950	Cytoplasmic	9.26
BPSL0955 ref|YP_107583.1|gi|53718597| transcriptional regulator CysB-like protein	BPSL0955	Cytoplasmic	9.97
BPSL0956 ref|YP_107584.1|gi|53718598| sulfite reductase	BPSL0956	Cytoplasmic	9.97
BPSL0957 ref|YP_107585.1|gi|53718599| hypothetical protein	BPSL0957	Cytoplasmic	8.96
BPSL0958 ref|YP_107586.1|gi|53718600| phosphoadenosine phosphosulfate reductase	BPSL0958	Cytoplasmic	9.97
BPSL0959 ref|YP_107587.1|gi|53718601| sulfate adenylyltransferase subunit 2	BPSL0959	Cytoplasmic	9.97
BPSL0960 ref|YP_107588.1|gi|53718602| sulfate adenylyltransferase subunit 1	BPSL0960	Cytoplasmic	9.97
BPSL0961 ref|YP_107589.1|gi|53718603| uroporphyrin-III C-methyltransferase	BPSL0961	Cytoplasmic	9.26
BPSL0965 ref|YP_107593.1|gi|53718607| leucyl aminopeptidase	BPSL0965	Cytoplasmic	9.97
BPSL0966 ref|YP_107594.1|gi|53718608| DNA polymerase III subunit chi	BPSL0966	Cytoplasmic	9.26
BPSL0969 ref|YP_107597.1|gi|53718611| dihydroxy-acid dehydratase	BPSL0969	Cytoplasmic	9.97
BPSL0979 ref|YP_107607.1|gi|53718621| nicotinate-nucleotide--dimethylbenzimidazole phosphoribosyltransferase	BPSL0979	Cytoplasmic	9.97
BPSL0981 ref|YP_107609.1|gi|53718623| phosphoglycerate mutase	BPSL0981	Cytoplasmic	9.26
BPSL0984 ref|YP_107612.1|gi|53718626| threonine-phosphate decarboxylase	BPSL0984	Cytoplasmic	9.26
BPSL0986 ref|YP_107614.1|gi|53718628| bifunctional cobalamin biosynthesis protein	BPSL0986	Cytoplasmic	9.26
BPSL0987 ref|YP_107615.1|gi|53718629| cobyric acid synthase	BPSL0987	Cytoplasmic	9.97
BPSL0991 ref|YP_107619.1|gi|53718633| pantoate--beta-alanine ligase	BPSL0991	Cytoplasmic	9.97
BPSL0992 ref|YP_107620.1|gi|53718634| hypothetical protein	BPSL0992	Cytoplasmic	9.97
BPSL0996 ref|YP_107624.1|gi|53718638| hypothetical protein	BPSL0996	Cytoplasmic	8.96
BPSL0997 ref|YP_107625.1|gi|53718639| methyltransferase	BPSL0997	Cytoplasmic	9.26
BPSL0998 ref|YP_107626.1|gi|53718640| methionyl-tRNA synthetase	BPSL0998	Cytoplasmic	10
BPSL1002 ref|YP_107630.1|gi|53718644| deoxycytidine triphosphate deaminase	BPSL1002	Cytoplasmic	9.26
BPSL1003 ref|YP_107631.1|gi|53718645| ornithine decarboxylase	BPSL1003	Cytoplasmic	9.97
BPSL1005 ref|YP_107633.1|gi|53718647| hydrolase	BPSL1005	Cytoplasmic	9.26
BPSL1006 ref|YP_107634.1|gi|53718648| argininosuccinate lyase	BPSL1006	Cytoplasmic	9.97
BPSL1015 ref|YP_107643.1|gi|53718657| porphobilinogen deaminase	BPSL1015	Cytoplasmic	9.97
BPSL1019 ref|YP_107647.1|gi|53718661| 3-ketoacyl-ACP reductase	BPSL1019	Cytoplasmic	9.26
BPSL1020 ref|YP_107648.1|gi|53718662| aldehyde dehydrogenase	BPSL1020	Cytoplasmic	9.97
BPSL1021 ref|YP_107649.1|gi|53718663| inorganic pyrophosphatase	BPSL1021	Cytoplasmic	9.97
BPSL1025 ref|YP_107651.1|gi|53718665| hypothetical protein	BPSL1025	Cytoplasmic	9.97
BPSL1026 ref|YP_107652.1|gi|53718666| NAD synthetase	BPSL1026	Cytoplasmic	9.97
BPSL1028 ref|YP_107654.1|gi|53718668| transposase	BPSL1028	Cytoplasmic	8.96
BPSL1034 ref|YP_107660.1|gi|53718674| hypothetical protein	BPSL1034	Cytoplasmic	9.97
BPSL1036 ref|YP_107662.1|gi|53718676| two-component system, response regulator	BPSL1036	Cytoplasmic	9.97
BPSL1044 ref|YP_107671.1|gi|53718685| alpha,alpha-trehalose-phosphate synthase	BPSL1044	Cytoplasmic	9.26
BPSL1062 ref|YP_107685.1|gi|53718699| translation initiation factor IF-1	BPSL1062	Cytoplasmic	10
BPSL1066 ref|YP_107689.1|gi|53718703| rubredoxin	BPSL1066	Cytoplasmic	9.26
BPSL1069 ref|YP_107692.1|gi|53718706| DNA topoisomerase IV subunit B	BPSL1069	Cytoplasmic	9.97
BPSL1070 ref|YP_107693.1|gi|53718707| DNA topoisomerase IV subunit A	BPSL1070	Cytoplasmic	9.12
BPSL1072 ref|YP_107695.1|gi|53718709| LysR family transcriptional regulator	BPSL1072	Cytoplasmic	9.97
BPSL1074 ref|YP_107697.1|gi|53718711| LysR family transcriptional regulator	BPSL1074	Cytoplasmic	9.97
BPSL1076 ref|YP_107699.1|gi|53718713| allantoate amidohydrolase	BPSL1076	Cytoplasmic	8.96
BPSL1078 ref|YP_107700.1|gi|53718714| aminohydrolase	BPSL1078	Cytoplasmic	9.97
BPSL1081 ref|YP_107703.1|gi|53718717| phenazine biosynthesis-like protein	BPSL1081	Cytoplasmic	9.26
BPSL1083 ref|YP_107705.1|gi|53718719| aminotransferase	BPSL1083	Cytoplasmic	9.97
BPSL1085 ref|YP_107707.1|gi|53718721| hypothetical protein	BPSL1085	Cytoplasmic	8.96
BPSL1086 ref|YP_107708.1|gi|53718722| GntR family transcriptional regulator	BPSL1086	Cytoplasmic	9.26
BPSL1087 ref|YP_107709.1|gi|53718723| heat shock protein 90	BPSL1087	Cytoplasmic	9.97
BPSL1088 ref|YP_107710.1|gi|53718724| hypothetical protein	BPSL1088	Cytoplasmic	9.26
BPSL1091 ref|YP_107712.1|gi|53718726| hypothetical protein	BPSL1091	Cytoplasmic	9.97
BPSL1095 ref|YP_107716.1|gi|53718730| transaldolase B	BPSL1095	Cytoplasmic	9.97
BPSL1097 ref|YP_107718.1|gi|53718732| hypothetical protein	BPSL1097	Cytoplasmic	9.97
BPSL1098 ref|YP_107719.1|gi|53718733| hypothetical protein	BPSL1098	Cytoplasmic	8.96
BPSL1101 ref|YP_107722.1|gi|53718736| hypothetical protein	BPSL1101	Cytoplasmic	8.96
BPSL1103 ref|YP_107724.1|gi|53718738| endonuclease III	BPSL1103	Cytoplasmic	9.97
BPSL1104 ref|YP_107725.1|gi|53718739| ferredoxin	BPSL1104	Cytoplasmic	9.12
BPSL1105 ref|YP_107726.1|gi|53718740| bsa-specific regulator BspR	BPSL1105	Cytoplasmic	9.97
BPSL1106 ref|YP_107727.1|gi|53718741| depolymerase/histone-like protein	BPSL1106	Cytoplasmic	8.96
BPSL1114 ref|YP_107735.1|gi|53718749| ATP-dependent RNA helicase 2	BPSL1114	Cytoplasmic	9.97
BPSL1115 ref|YP_107736.1|gi|53718750| glutamyl-Q tRNA(Asp) synthetase	BPSL1115	Cytoplasmic	9.26
BPSL1116 ref|YP_107737.1|gi|53718751| rhodanese superfamily protein	BPSL1116	Cytoplasmic	8.96
BPSL1117 ref|YP_107738.1|gi|53718752| DNA polymerase III subunit alpha	BPSL1117	Cytoplasmic	9.97
BPSL1119 ref|YP_107740.1|gi|53718754| LPS biosynthesis-like protein	BPSL1119	Cytoplasmic	8.96
BPSL1120 ref|YP_107741.1|gi|53718755| transferase	BPSL1120	Cytoplasmic	9.97
BPSL1122 ref|YP_107743.1|gi|53718757| glycosyl transferase	BPSL1122	Cytoplasmic	9.26
BPSL1123 ref|YP_107744.1|gi|53718758| LPS core biosynthesis-like protein	BPSL1123	Cytoplasmic	9.97
BPSL1130 ref|YP_107752.1|gi|53718766| sigma factor	BPSL1130	Cytoplasmic	8.96
BPSL1137 ref|YP_107758.1|gi|53718772| hypothetical protein	BPSL1137	Cytoplasmic	8.96
BPSL1138 ref|YP_107759.1|gi|53718773| hypothetical protein	BPSL1138	Cytoplasmic	8.96
BPSL1143 ref|YP_107764.1|gi|53718778| phage terminase	BPSL1143	Cytoplasmic	8.96
BPSL1145 ref|YP_107766.1|gi|53718780| phage-like protein	BPSL1145	Cytoplasmic	8.96
BPSL1150 ref|YP_107771.1|gi|53718785| hypothetical protein	BPSL1150	Cytoplasmic	8.96
BPSL1157 ref|YP_107779.1|gi|53718793| phage integrase	BPSL1157	Cytoplasmic	8.96
BPSL1158 ref|YP_107780.1|gi|53718794| ribonuclease G	BPSL1158	Cytoplasmic	9.97
BPSL1159 ref|YP_107781.1|gi|53718795| Maf-like protein	BPSL1159	Cytoplasmic	9.97
BPSL1161 ref|YP_107783.1|gi|53718797| hypothetical protein	BPSL1161	Cytoplasmic	9.97
BPSL1162 ref|YP_107784.1|gi|53718798| nicotinic acid mononucleotide adenylyltransferase	BPSL1162	Cytoplasmic	9.26
BPSL1163 ref|YP_107785.1|gi|53718799| coproporphyrinogen III oxidase	BPSL1163	Cytoplasmic	9.97
BPSL1164 ref|YP_107786.1|gi|53718800| phosphoribosylamine--glycine ligase	BPSL1164	Cytoplasmic	9.97
BPSL1165 ref|YP_107787.1|gi|53718801| hypothetical protein	BPSL1165	Cytoplasmic	8.96
BPSL1166 ref|YP_107788.1|gi|53718802| uracil phosphoribosyltransferase	BPSL1166	Cytoplasmic	9.97
BPSL1167 ref|YP_107789.1|gi|53718803| dehydrogenase	BPSL1167	Cytoplasmic	9.97
BPSL1168 ref|YP_107790.1|gi|53718804| methylglyoxal synthase	BPSL1168	Cytoplasmic	9.97
BPSL1169 ref|YP_107791.1|gi|53718805| quinone oxidoreductase	BPSL1169	Cytoplasmic	9.97
BPSL1175 ref|YP_107797.1|gi|53718811| two-component system, regulatory protein KdpE	BPSL1175	Cytoplasmic	9.97
BPSL1180 ref|YP_107802.1|gi|53718816| globin	BPSL1180	Cytoplasmic	8.96
BPSL1181 ref|YP_107803.1|gi|53718817| alanyl-tRNA synthetase	BPSL1181	Cytoplasmic	9.97
BPSL1183 ref|YP_107805.1|gi|53718819| amidase	BPSL1183	Cytoplasmic	9.97
BPSL1186 ref|YP_107808.1|gi|53718822| glucose-1-dehydrogenase	BPSL1186	Cytoplasmic	9.26
BPSL1188 ref|YP_107810.1|gi|53718824| TetR family transcriptional regulator	BPSL1188	Cytoplasmic	9.97
BPSL1190 ref|YP_107812.1|gi|53718826| glycosyltransferase	BPSL1190	Cytoplasmic	9.97
BPSL1195 ref|YP_107817.1|gi|53718831| RNA polymerase factor sigma-70	BPSL1195	Cytoplasmic	8.96
BPSL1196 ref|YP_107818.1|gi|53718832| acetolactate synthase 3 catalytic subunit	BPSL1196	Cytoplasmic	9.97
BPSL1197 ref|YP_107819.1|gi|53718833| acetolactate synthase 3 regulatory subunit	BPSL1197	Cytoplasmic	9.97
BPSL1198 ref|YP_107820.1|gi|53718834| ketol-acid reductoisomerase	BPSL1198	Cytoplasmic	9.97
BPSL1201 ref|YP_107823.1|gi|53718837| 2-isopropylmalate synthase	BPSL1201	Cytoplasmic	9.97
BPSL1203 ref|YP_107825.1|gi|53718839| carbonic anhydrase	BPSL1203	Cytoplasmic	9.26
BPSL1206 ref|YP_107828.1|gi|53718842| 30S ribosomal protein S15	BPSL1206	Cytoplasmic	9.26
BPSL1207 ref|YP_107829.1|gi|53718843| polynucleotide phosphorylase	BPSL1207	Cytoplasmic	9.97
BPSL1209 ref|YP_107831.1|gi|53718845| triosephosphate isomerase	BPSL1209	Cytoplasmic	9.26
BPSL1213 ref|YP_107835.1|gi|53718849| NADH dehydrogenase subunit C	BPSL1213	Cytoplasmic	9.12
BPSL1214 ref|YP_107836.1|gi|53718850| NADH dehydrogenase subunit D	BPSL1214	Cytoplasmic	9.12
BPSL1216 ref|YP_107838.1|gi|53718852| NADH dehydrogenase I chain F	BPSL1216	Cytoplasmic	9.12
BPSL1217 ref|YP_107839.1|gi|53718853| NADH dehydrogenase subunit G	BPSL1217	Cytoplasmic	9.12
BPSL1219 ref|YP_107841.1|gi|53718855| NADH dehydrogenase subunit I	BPSL1219	Cytoplasmic	9.12
BPSL1226 ref|YP_107848.1|gi|53718862| hypothetical protein	BPSL1226	Cytoplasmic	9.97
BPSL1227 ref|YP_107849.1|gi|53718863| hypothetical protein	BPSL1227	Cytoplasmic	8.96
BPSL1228 ref|YP_107850.1|gi|53718864| acyl-CoA dehydrogenase	BPSL1228	Cytoplasmic	9.97
BPSL1229 ref|YP_107851.1|gi|53718865| acyl-CoA dehydrogenase	BPSL1229	Cytoplasmic	9.97
BPSL1234 ref|YP_107855.1|gi|53718869| acyl-CoA dehydrogenase	BPSL1234	Cytoplasmic	9.97
BPSL1235 ref|YP_107856.1|gi|53718870| phosphotransferase	BPSL1235	Cytoplasmic	9.97
BPSL1237 ref|YP_107858.1|gi|53718872| enoyl-CoA hydratase	BPSL1237	Cytoplasmic	9.26
BPSL1238 ref|YP_107859.1|gi|53718873| glutathione S-transferase-like protein	BPSL1238	Cytoplasmic	8.96
BPSL1241 ref|YP_107862.1|gi|53718876| hypothetical protein	BPSL1241	Cytoplasmic	8.96
BPSL1242 ref|YP_107863.1|gi|53718877| peptidase	BPSL1242	Cytoplasmic	8.96
BPSL1245 ref|YP_107866.1|gi|53718880| transcriptional regulator	BPSL1245	Cytoplasmic	9.26
BPSL1246 ref|YP_107867.1|gi|53718881| hypothetical protein	BPSL1246	Cytoplasmic	8.96
BPSL1247 ref|YP_107868.1|gi|53718882| peptidase	BPSL1247	Cytoplasmic	9.97
BPSL1249 ref|YP_107870.1|gi|53718884| AraC family transcriptional regulator	BPSL1249	Cytoplasmic	9.97
BPSL1250 ref|YP_107871.1|gi|53718885| D-3-phosphoglycerate dehydrogenase	BPSL1250	Cytoplasmic	9.26
BPSL1262 ref|YP_107883.1|gi|53718897| hypothetical protein	BPSL1262	Cytoplasmic	8.96
BPSL1269 ref|YP_107890.1|gi|53718904| IclR family transcriptional regulator	BPSL1269	Cytoplasmic	9.97
BPSL1275 ref|YP_107896.1|gi|53718910| AsnC family transcriptional regulator	BPSL1275	Cytoplasmic	9.97
BPSL1283 ref|YP_107904.1|gi|53718918| exodeoxyribonuclease V subunit beta	BPSL1283	Cytoplasmic	8.96
BPSL1290 ref|YP_107911.1|gi|53718925| thiamine biosynthesis protein ThiC	BPSL1290	Cytoplasmic	9.97
BPSL1299 ref|YP_107921.1|gi|53718935| phosphodiesterase	BPSL1299	Cytoplasmic	9.97
BPSL1307 ref|YP_107931.1|gi|53718945| hypothetical protein	BPSL1307	Cytoplasmic	8.96
BPSL1309 ref|YP_107933.1|gi|53718947| hypothetical protein	BPSL1309	Cytoplasmic	9.97
BPSL1310 ref|YP_107934.1|gi|53718948| GntR family transcriptional regulator	BPSL1310	Cytoplasmic	9.97
BPSL1311 ref|YP_107935.1|gi|53718949| AsnC family transcriptional regulator	BPSL1311	Cytoplasmic	9.26
BPSL1312 ref|YP_107936.1|gi|53718950| glucosamine--fructose-6-phosphate aminotransferase [isomerizing] 2	BPSL1312	Cytoplasmic	9.97
BPSL1313 ref|YP_107937.1|gi|53718951| dioxygenase	BPSL1313	Cytoplasmic	8.96
BPSL1315 ref|YP_107939.1|gi|53718953| LysR family transcriptional regulator	BPSL1315	Cytoplasmic	9.97
BPSL1319 ref|YP_107943.1|gi|53718957| nitrite/sulfite reductase	BPSL1319	Cytoplasmic	9.97
BPSL1321 ref|YP_107945.1|gi|53718959| GntR family transcriptional regulator	BPSL1321	Cytoplasmic	9.97
BPSL1322 ref|YP_107946.1|gi|53718960| heat shock protein	BPSL1322	Cytoplasmic	8.96
BPSL1323 ref|YP_107947.1|gi|53718961| heat shock protein	BPSL1323	Cytoplasmic	8.96
BPSL1324 ref|YP_107949.1|gi|53718963| phosphoenolpyruvate carboxykinase	BPSL1324	Cytoplasmic	9.26
BPSL1325 ref|YP_107950.1|gi|53718964| 3-hydroxyacyl-CoA dehydrogenase	BPSL1325	Cytoplasmic	9.26
BPSL1326 ref|YP_107951.1|gi|53718965| LysR family transcriptional regulator	BPSL1326	Cytoplasmic	9.97
BPSL1329 ref|YP_107954.1|gi|53718968| malonate decarboxylase subunit alpha	BPSL1329	Cytoplasmic	9.97
BPSL1330 ref|YP_107955.1|gi|53718969| malonate decarboxylase subunit delta	BPSL1330	Cytoplasmic	9.26
BPSL1331 ref|YP_107956.1|gi|53718970| malonate decarboxylase subunit beta	BPSL1331	Cytoplasmic	9.97
BPSL1332 ref|YP_107957.1|gi|53718971| malonate decarboxylase subunit gamma	BPSL1332	Cytoplasmic	9.97
BPSL1335 ref|YP_107960.1|gi|53718974| ACP S-malonyltransferase	BPSL1335	Cytoplasmic	9.97
BPSL1338 ref|YP_107963.1|gi|53718977| glutathione S-transferase-like protein	BPSL1338	Cytoplasmic	9.26
BPSL1341 ref|YP_107966.1|gi|53718980| DNA polymerase III subunit epsilon	BPSL1341	Cytoplasmic	9.97
BPSL1344 ref|YP_107969.1|gi|53718983| gultathione hydrolase	BPSL1344	Cytoplasmic	9.97
BPSL1348 ref|YP_107973.1|gi|53718987| AraC family transcriptional regulator	BPSL1348	Cytoplasmic	9.97
BPSL1349 ref|YP_107974.1|gi|53718988| carbamoyl phosphate synthase small subunit	BPSL1349	Cytoplasmic	9.26
BPSL1352 ref|YP_107977.1|gi|53718991| transcription elongation factor GreA	BPSL1352	Cytoplasmic	9.97
BPSL1354 ref|YP_107979.1|gi|53718993| hypothetical protein	BPSL1354	Cytoplasmic	9.26
BPSL1355 ref|YP_107980.1|gi|53718994| ribosomal RNA large subunit methyltransferase	BPSL1355	Cytoplasmic	9.97
BPSL1357 ref|YP_107982.1|gi|53718996| dihydropteroate synthase	BPSL1357	Cytoplasmic	9.97
BPSL1358 ref|YP_107983.1|gi|53718997| phosphoglucosamine mutase	BPSL1358	Cytoplasmic	9.97
BPSL1363 ref|YP_107988.1|gi|53719002| phosphate transport system-like protein	BPSL1363	Cytoplasmic	9.97
BPSL1364 ref|YP_107989.1|gi|53719003| phosphate regulon two-component system response regulator	BPSL1364	Cytoplasmic	9.97
BPSL1367 ref|YP_107992.1|gi|53719006| exopolyphosphatase	BPSL1367	Cytoplasmic	9.97
BPSL1375 ref|YP_108000.1|gi|53719014| hypothetical protein	BPSL1375	Cytoplasmic	8.96
BPSL1380 ref|YP_108005.1|gi|53719019| acetyl-CoA synthetase	BPSL1380	Cytoplasmic	9.97
BPSL1382 ref|YP_108007.1|gi|53719021| hypothetical protein	BPSL1382	Cytoplasmic	8.96
BPSL1395 ref|YP_108017.1|gi|53719031| histone deacetylase	BPSL1395	Cytoplasmic	9.26
BPSL1398 ref|YP_108020.1|gi|53719034| GerE family transcriptional regulator	BPSL1398	Cytoplasmic	8.96
BPSL1400 ref|YP_108022.1|gi|53719036| MarR family transcriptional regulator	BPSL1400	Cytoplasmic	9.26
BPSL1401 ref|YP_108023.1|gi|53719037| kinase	BPSL1401	Cytoplasmic	9.97
BPSL1402 ref|YP_108024.1|gi|53719038| trigger factor	BPSL1402	Cytoplasmic	8.96
BPSL1403 ref|YP_108025.1|gi|53719039| ATP-dependent Clp protease proteolytic subunit	BPSL1403	Cytoplasmic	9.97
BPSL1404 ref|YP_108026.1|gi|53719040| ATP-dependent protease ATP-binding subunit ClpX	BPSL1404	Cytoplasmic	9.97
BPSL1405 ref|YP_108027.1|gi|53719041| ATP-dependent protease	BPSL1405	Cytoplasmic	9.97
BPSL1406 ref|YP_108028.1|gi|53719042| hypothetical protein	BPSL1406	Cytoplasmic	8.96
BPSL1413 ref|YP_108035.1|gi|53719049| glucose-6-phosphate isomerase	BPSL1413	Cytoplasmic	9.97
BPSL1416 ref|YP_108038.1|gi|53719052| phosphoribosylformylglycinamidine synthase	BPSL1416	Cytoplasmic	9.97
BPSL1421 ref|YP_108043.1|gi|53719057| peptide methionine sulfoxide reductase	BPSL1421	Cytoplasmic	9.97
BPSL1422 ref|YP_108044.1|gi|53719058| hypothetical protein	BPSL1422	Cytoplasmic	8.96
BPSL1423 ref|YP_108045.1|gi|53719059| long-chain-fatty-acid--CoA ligase	BPSL1423	Cytoplasmic	9.97
BPSL1424 ref|YP_108046.1|gi|53719060| fatty acid degradation protein	BPSL1424	Cytoplasmic	9.97
BPSL1425 ref|YP_108047.1|gi|53719061| pyrazinamidase/nicotinamidase	BPSL1425	Cytoplasmic	9.26
BPSL1426 ref|YP_108048.1|gi|53719062| acetyl-CoA acetyltransferase	BPSL1426	Cytoplasmic	9.97
BPSL1428 ref|YP_108050.1|gi|53719064| hypothetical protein	BPSL1428	Cytoplasmic	8.96
BPSL1430 ref|YP_108052.1|gi|53719066| oxidoreductase	BPSL1430	Cytoplasmic	9.97
BPSL1431 ref|YP_108053.1|gi|53719067| esterase/lipase	BPSL1431	Cytoplasmic	9.26
BPSL1432 ref|YP_108054.1|gi|53719068| acetyltransferase	BPSL1432	Cytoplasmic	9.97
BPSL1433 ref|YP_108055.1|gi|53719069| hypothetical protein	BPSL1433	Cytoplasmic	8.96
BPSL1436 ref|YP_108058.1|gi|53719072| thymidylate kinase	BPSL1436	Cytoplasmic	9.97
BPSL1437 ref|YP_108059.1|gi|53719073| DNA polymerase III subunit delta'	BPSL1437	Cytoplasmic	9.97
BPSL1439 ref|YP_108061.1|gi|53719075| deoxyribonuclease	BPSL1439	Cytoplasmic	9.97
BPSL1443 ref|YP_108065.1|gi|53719079| hypothetical protein	BPSL1443	Cytoplasmic	9.26
BPSL1444 ref|YP_108066.1|gi|53719080| sugar transferase	BPSL1444	Cytoplasmic	9.97
BPSL1450 ref|YP_108072.1|gi|53719086| 2-hydroxy-3-oxopropionate reductase	BPSL1450	Cytoplasmic	9.97
BPSL1451 ref|YP_108073.1|gi|53719087| hydroxypyruvate isomerase	BPSL1451	Cytoplasmic	9.97
BPSL1452 ref|YP_108074.1|gi|53719088| glyoxylate carboligase	BPSL1452	Cytoplasmic	9.97
BPSL1453 ref|YP_108075.1|gi|53719089| LysR family transcriptional regulator	BPSL1453	Cytoplasmic	9.97
BPSL1456 ref|YP_108078.1|gi|53719092| RNA polymerase sigma factor	BPSL1456	Cytoplasmic	9.97
BPSL1457 ref|YP_108079.1|gi|53719093| hypothetical protein	BPSL1457	Cytoplasmic	8.96
BPSL1458 ref|YP_108080.1|gi|53719094| 30S ribosomal protein S6	BPSL1458	Cytoplasmic	9.97
BPSL1460 ref|YP_108082.1|gi|53719096| 30S ribosomal protein S18	BPSL1460	Cytoplasmic	9.26
BPSL1461 ref|YP_108083.1|gi|53719097| 50S ribosomal protein L9	BPSL1461	Cytoplasmic	9.97
BPSL1462 ref|YP_108084.1|gi|53719098| replicative DNA helicase	BPSL1462	Cytoplasmic	9.97
BPSL1463 ref|YP_108085.1|gi|53719099| hypothetical protein	BPSL1463	Cytoplasmic	8.96
BPSL1466 ref|YP_108088.1|gi|53719102| hypothetical protein	BPSL1466	Cytoplasmic	9.97
BPSL1467 ref|YP_108089.1|gi|53719103| bacterioferritin comigratory protein	BPSL1467	Cytoplasmic	9.97
BPSL1468 ref|YP_108090.1|gi|53719104| hypothetical protein	BPSL1468	Cytoplasmic	9.97
BPSL1472 ref|YP_108092.1|gi|53719106| LPS biosynthesis-like protein	BPSL1472	Cytoplasmic	9.97
BPSL1476 ref|YP_108096.1|gi|53719110| aminotransferase	BPSL1476	Cytoplasmic	9.97
BPSL1477 ref|YP_108097.1|gi|53719111| homoserine dehydrogenase	BPSL1477	Cytoplasmic	9.97
BPSL1478 ref|YP_108098.1|gi|53719112| threonine synthase	BPSL1478	Cytoplasmic	9.97
BPSL1479 ref|YP_108099.1|gi|53719113| molybdopterin biosynthesis protein	BPSL1479	Cytoplasmic	9.97
BPSL1481 ref|YP_108101.1|gi|53719115| molybdopterin converting factor subunit 2	BPSL1481	Cytoplasmic	9.97
BPSL1484 ref|YP_108104.1|gi|53719118| ClpB heat-shock protein	BPSL1484	Cytoplasmic	9.97
BPSL1488 ref|YP_108108.1|gi|53719122| decarboxylase	BPSL1488	Cytoplasmic	8.96
BPSL1491 ref|YP_108111.1|gi|53719125| 50S ribosomal protein L31	BPSL1491	Cytoplasmic	9.26
BPSL1492 ref|YP_108112.1|gi|53719126| hypothetical protein	BPSL1492	Cytoplasmic	8.96
BPSL1494 ref|YP_108114.1|gi|53719128| MerR family transcriptional regulator	BPSL1494	Cytoplasmic	8.96
BPSL1495 ref|YP_108115.1|gi|53719129| transcription termination factor Rho	BPSL1495	Cytoplasmic	9.97
BPSL1497 ref|YP_108117.1|gi|53719131| thioredoxin 1	BPSL1497	Cytoplasmic	9.26
BPSL1498 ref|YP_108118.1|gi|53719132| DNA polymerase III subunits gamma and tau	BPSL1498	Cytoplasmic	9.97
BPSL1500 ref|YP_108120.1|gi|53719134| recombination protein RecR	BPSL1500	Cytoplasmic	9.97
BPSL1501 ref|YP_108121.1|gi|53719135| transferase	BPSL1501	Cytoplasmic	9.97
BPSL1503 ref|YP_108123.1|gi|53719137| L-isoaspartate O-methyltransferase	BPSL1503	Cytoplasmic	9.97
BPSL1505 ref|YP_108125.1|gi|53719139| RNA polymerase sigma factor RpoS	BPSL1505	Cytoplasmic	9.97
BPSL1506 ref|YP_108126.1|gi|53719140| hypothetical protein	BPSL1506	Cytoplasmic	8.96
BPSL1507 ref|YP_108127.1|gi|53719141| hypothetical protein	BPSL1507	Cytoplasmic	8.96
BPSL1508 ref|YP_108128.1|gi|53719142| 23S rRNA 5-methyluridine methyltransferase	BPSL1508	Cytoplasmic	9.97
BPSL1511 ref|YP_108131.1|gi|53719145| hypothetical protein	BPSL1511	Cytoplasmic	9.97
BPSL1513 ref|YP_108133.1|gi|53719147| 4-hydroxy-3-methylbut-2-en-1-yl diphosphate synthase	BPSL1513	Cytoplasmic	9.97
BPSL1514 ref|YP_108134.1|gi|53719148| histidyl-tRNA synthetase	BPSL1514	Cytoplasmic	10
BPSL1518 ref|YP_108138.1|gi|53719152| RNA-binding protein Hfq	BPSL1518	Cytoplasmic	9.26
BPSL1519 ref|YP_108139.1|gi|53719153| GTP-binding protein	BPSL1519	Cytoplasmic	8.96
BPSL1523 ref|YP_108143.1|gi|53719157| ATP phosphoribosyltransferase	BPSL1523	Cytoplasmic	9.97
BPSL1524 ref|YP_108144.1|gi|53719158| adenylosuccinate synthetase	BPSL1524	Cytoplasmic	9.97
BPSL1525 ref|YP_108145.1|gi|53719159| nucleotide phosphoribosyltransferase	BPSL1525	Cytoplasmic	8.96
BPSL1527 ref|YP_108147.1|gi|53719161| transcription accessory protein	BPSL1527	Cytoplasmic	9.97
BPSL1530 ref|YP_108150.1|gi|53719164| ATP-dependent DNA helicase-like protein	BPSL1530	Cytoplasmic	9.97
BPSL1532 ref|YP_108152.1|gi|53719166| ribosomal large subunit pseudouridine synthase D	BPSL1532	Cytoplasmic	9.26
BPSL1534 ref|YP_108154.1|gi|53719168| poly-beta-hydroxybutyrate polymerase	BPSL1534	Cytoplasmic	9.26
BPSL1535 ref|YP_108155.1|gi|53719169| acetyl-CoA acetyltransferase	BPSL1535	Cytoplasmic	9.97
BPSL1536 ref|YP_108156.1|gi|53719170| acetyacetyl-CoA reductase	BPSL1536	Cytoplasmic	9.97
BPSL1538 ref|YP_108158.1|gi|53719172| ribosomal protein S12 methylthiotransferase	BPSL1538	Cytoplasmic	9.97
BPSL1539 ref|YP_108159.1|gi|53719173| fructokinase-like protein	BPSL1539	Cytoplasmic	9.26
BPSL1540 ref|YP_108160.1|gi|53719174| beta-ketothiolase	BPSL1540	Cytoplasmic	9.97
BPSL1542 ref|YP_108162.1|gi|53719176| cystathionine beta-lyase	BPSL1542	Cytoplasmic	9.97
BPSL1543 ref|YP_108163.1|gi|53719177| phosphoserine phosphatase	BPSL1543	Cytoplasmic	9.97
BPSL1548 ref|YP_108168.1|gi|53719182| ABC transporter ATP-binding protein	BPSL1548	Cytoplasmic	9.26
BPSL1550 ref|YP_108170.1|gi|53719184| betaine aldehyde dehydrogenase	BPSL1550	Cytoplasmic	9.97
BPSL1551 ref|YP_108171.1|gi|53719185| 2-nitropropane dioxygenase	BPSL1551	Cytoplasmic	8.96
BPSL1561 ref|YP_108181.1|gi|53719195| metallo-beta-lactamase	BPSL1561	Cytoplasmic	9.26
BPSL1562 ref|YP_108182.1|gi|53719196| transcriptional regulatory protein	BPSL1562	Cytoplasmic	9.97
BPSL1569 ref|YP_108189.1|gi|53719203| TetR family regulatory protein	BPSL1569	Cytoplasmic	8.96
BPSL1572 ref|YP_108192.1|gi|53719206| LysR family transcriptional regulator	BPSL1572	Cytoplasmic	9.97
BPSL1575 ref|YP_108195.1|gi|53719209| sugar kinase	BPSL1575	Cytoplasmic	9.97
BPSL1577 ref|YP_108197.1|gi|53719211| 2-ketogluconate reductase	BPSL1577	Cytoplasmic	9.97
BPSL1578 ref|YP_108198.1|gi|53719212| LacI family transcriptional regulator	BPSL1578	Cytoplasmic	9.97
BPSL1588 ref|YP_108204.1|gi|53719218| AsnC family transcriptional regulator	BPSL1588	Cytoplasmic	9.26
BPSL1591 ref|YP_108207.1|gi|53719221| hypothetical protein	BPSL1591	Cytoplasmic	8.96
BPSL1592 ref|YP_108208.1|gi|53719222| ATP-ase	BPSL1592	Cytoplasmic	8.96
BPSL1601 ref|YP_108217.1|gi|53719231| hypothetical protein	BPSL1601	Cytoplasmic	8.96
BPSL1613 ref|YP_108229.1|gi|53719243| dihydroxyacetone kinase	BPSL1613	Cytoplasmic	8.96
BPSL1614 ref|YP_108230.1|gi|53719244| hypothetical protein	BPSL1614	Cytoplasmic	8.96
BPSL1618 ref|YP_108234.1|gi|53719248| hypothetical protein	BPSL1618	Cytoplasmic	8.96
BPSL1633 ref|YP_108247.1|gi|53719261| two-component system, response regulator	BPSL1633	Cytoplasmic	9.97
BPSL1636 ref|YP_108250.1|gi|53719264| regulatory protein	BPSL1636	Cytoplasmic	8.96
BPSL1642 ref|YP_108252.1|gi|53719266| GntR family transcriptional regulator	BPSL1642	Cytoplasmic	9.97
BPSL1643 ref|YP_108253.1|gi|53719267| hypothetical protein	BPSL1643	Cytoplasmic	8.96
BPSL1645 ref|YP_108255.1|gi|53719269| oxygenase	BPSL1645	Cytoplasmic	8.96
BPSL1646 ref|YP_108256.1|gi|53719270| monooxygenase	BPSL1646	Cytoplasmic	9.26
BPSL1647 ref|YP_108257.1|gi|53719271| betaine aldehyde dehydrogenase	BPSL1647	Cytoplasmic	9.97
BPSL1653 ref|YP_108263.1|gi|53719277| GntR family transcriptional regulator	BPSL1653	Cytoplasmic	9.97
BPSL1654 ref|YP_108264.1|gi|53719278| succinate-semialdehyde dehydrogenase	BPSL1654	Cytoplasmic	9.26
BPSL1657 ref|YP_108267.1|gi|53719281| hypothetical protein	BPSL1657	Cytoplasmic	9.97
BPSL1658 ref|YP_108268.1|gi|53719282| hypothetical protein	BPSL1658	Cytoplasmic	9.26
BPSL1658a ref|YP_108269.1|gi|53719283| DNA-biding protein, H-NS-like	BPSL1658a	Cytoplasmic	8.96
BPSL1666 ref|YP_108277.1|gi|53719291| hypothetical protein	BPSL1666	Cytoplasmic	8.96
BPSL1667 ref|YP_108278.1|gi|53719292| hypothetical protein	BPSL1667	Cytoplasmic	8.96
BPSL1668 ref|YP_108279.1|gi|53719293| adenylylsulfate kinase	BPSL1668	Cytoplasmic	9.97
BPSL1669 ref|YP_108280.1|gi|53719294| two component system response regulator	BPSL1669	Cytoplasmic	9.97
BPSL1678 ref|YP_108288.1|gi|53719302| urocanate hydratase	BPSL1678	Cytoplasmic	9.26
BPSL1679 ref|YP_108289.1|gi|53719303| hypothetical protein	BPSL1679	Cytoplasmic	8.96
BPSL1680 ref|YP_108290.1|gi|53719304| LysR family transcriptional regulator	BPSL1680	Cytoplasmic	9.97
BPSL1691 ref|YP_108298.1|gi|53719312| hypothetical protein	BPSL1691	Cytoplasmic	8.96
BPSL1695 ref|YP_108300.1|gi|53719314| GntR family transcriptional regulator	BPSL1695	Cytoplasmic	9.97
BPSL1696 ref|YP_108301.1|gi|53719315| recombinase	BPSL1696	Cytoplasmic	8.96
BPSL1711 ref|YP_108311.1|gi|53719325| carbamoyl transferase	BPSL1711	Cytoplasmic	9.26
BPSL1714 ref|YP_108314.1|gi|53719328| threonine aldolase	BPSL1714	Cytoplasmic	9.97
BPSL1715 ref|YP_108315.1|gi|53719329| argininosuccinate lyase	BPSL1715	Cytoplasmic	9.97
BPSL1716 ref|YP_108316.1|gi|53719330| cysteine synthase	BPSL1716	Cytoplasmic	9.26
BPSL1717 ref|YP_108317.1|gi|53719331| hypothetical protein	BPSL1717	Cytoplasmic	8.96
BPSL1719 ref|YP_108319.1|gi|53719333| kinase	BPSL1719	Cytoplasmic	8.96
BPSL1720 ref|YP_108320.1|gi|53719334| argininosuccinate lyase	BPSL1720	Cytoplasmic	9.97
BPSL1721 ref|YP_108321.1|gi|53719335| argininosuccinate synthase	BPSL1721	Cytoplasmic	9.97
BPSL1722 ref|YP_108322.1|gi|53719336| formyl transferase	BPSL1722	Cytoplasmic	8.96
BPSL1723 ref|YP_108323.1|gi|53719337| hypothetical protein	BPSL1723	Cytoplasmic	8.96
BPSL1724 ref|YP_108324.1|gi|53719338| histidinol-phosphate aminotransferase	BPSL1724	Cytoplasmic	9.97
BPSL1725 ref|YP_108325.1|gi|53719339| hypothetical protein	BPSL1725	Cytoplasmic	8.96
BPSL1727 ref|YP_108327.1|gi|53719341| non-ribosomal peptide synthase	BPSL1727	Cytoplasmic	9.97
BPSL1729 ref|YP_108329.1|gi|53719343| AraC family transcriptional regulator	BPSL1729	Cytoplasmic	9.97
BPSL1731 ref|YP_108331.1|gi|53719345| chemotaxis protein CheW	BPSL1731	Cytoplasmic	9.97
BPSL1734 ref|YP_108334.1|gi|53719348| AMP-binding protein	BPSL1734	Cytoplasmic	9.97
BPSL1736 ref|YP_108336.1|gi|53719350| methyltransferase	BPSL1736	Cytoplasmic	8.96
BPSL1743 ref|YP_108343.1|gi|53719357| arginine deiminase	BPSL1743	Cytoplasmic	9.97
BPSL1744 ref|YP_108344.1|gi|53719358| ornithine carbamoyltransferase	BPSL1744	Cytoplasmic	9.97
BPSL1745 ref|YP_108345.1|gi|53719359| carbamate kinase	BPSL1745	Cytoplasmic	9.97
BPSL1746 ref|YP_108346.1|gi|53719360| short chain dehydrogenase	BPSL1746	Cytoplasmic	9.97
BPSL1748 ref|YP_108348.1|gi|53719362| LysR family transcriptional regulator	BPSL1748	Cytoplasmic	9.97
BPSL1749 ref|YP_108349.1|gi|53719363| glutathione S-transferase	BPSL1749	Cytoplasmic	9.97
BPSL1750 ref|YP_108350.1|gi|53719364| MarR family transcriptional regulator	BPSL1750	Cytoplasmic	8.96
BPSL1752 ref|YP_108352.1|gi|53719366| MarR family transcriptional regulator	BPSL1752	Cytoplasmic	9.26
BPSL1755 ref|YP_108355.1|gi|53719369| precorrin-4 C11-methyltransferase	BPSL1755	Cytoplasmic	9.97
BPSL1756 ref|YP_108356.1|gi|53719370| cobalt-precorrin-6x reductase	BPSL1756	Cytoplasmic	9.26
BPSL1757 ref|YP_108357.1|gi|53719371| cobalt-precorrin-6A synthase	BPSL1757	Cytoplasmic	8.96
BPSL1758 ref|YP_108358.1|gi|53719372| precorrin-6Y C5,15-methyltransferase	BPSL1758	Cytoplasmic	9.26
BPSL1761 ref|YP_108361.1|gi|53719375| precorrin-2 C20-methyltransferase	BPSL1761	Cytoplasmic	9.26
BPSL1762 ref|YP_108362.1|gi|53719376| precorrin-3B C17-methyltransferase	BPSL1762	Cytoplasmic	9.26
BPSL1767 ref|YP_108367.1|gi|53719381| magnesium chelatase	BPSL1767	Cytoplasmic	8.96
BPSL1768 ref|YP_108368.1|gi|53719382| cobaltochelatase subunit CobN	BPSL1768	Cytoplasmic	9.26
BPSL1769 ref|YP_108369.1|gi|53719383| cobalamin biosynthesis-like protein	BPSL1769	Cytoplasmic	9.97
BPSL1772 ref|YP_108372.1|gi|53719386| cob(I)yrinic acid a,c-diamide adenosyltransferase	BPSL1772	Cytoplasmic	9.97
BPSL1773 ref|YP_108373.1|gi|53719387| cobyrinic acid A,C-diamide synthase	BPSL1773	Cytoplasmic	9.26
BPSL1774 ref|YP_108374.1|gi|53719388| siderophore biosynthesis-like protein	BPSL1774	Cytoplasmic	9.97
BPSL1776 ref|YP_108376.1|gi|53719390| L-ornithine 5-monooxygenase	BPSL1776	Cytoplasmic	9.97
BPSL1780 ref|YP_108380.1|gi|53719394| hypothetical protein	BPSL1780	Cytoplasmic	9.26
BPSL1782 ref|YP_108382.1|gi|53719396| iron transport-related membrane protein	BPSL1782	Cytoplasmic	9.26
BPSL1785 ref|YP_108385.1|gi|53719399| hypothetical protein	BPSL1785	Cytoplasmic	9.97
BPSL1787 ref|YP_108387.1|gi|53719401| extracytoplasmic-function sigma-70 factor	BPSL1787	Cytoplasmic	9.97
BPSL1790 ref|YP_108389.1|gi|53719403| zinc-binding dehydrogenase	BPSL1790	Cytoplasmic	9.97
BPSL1792 ref|YP_108391.1|gi|53719405| hypothetical protein	BPSL1792	Cytoplasmic	8.96
BPSL1794 ref|YP_108393.1|gi|53719407| AraC family transcriptional regulator	BPSL1794	Cytoplasmic	9.97
BPSL1795 ref|YP_108394.1|gi|53719408| hypothetical protein	BPSL1795	Cytoplasmic	8.96
BPSL1796 ref|YP_108395.1|gi|53719409| hypothetical protein	BPSL1796	Cytoplasmic	8.96
BPSL1805 ref|YP_108404.1|gi|53719418| TetR family regulatory protein	BPSL1805	Cytoplasmic	9.97
BPSL1816 ref|YP_108415.1|gi|53719429| fimbriae assembly-like protein	BPSL1816	Cytoplasmic	8.96
BPSL1826 ref|YP_108425.1|gi|53719439| SpoVR family protein	BPSL1826	Cytoplasmic	9.97
BPSL1827 ref|YP_108426.1|gi|53719440| hypothetical protein	BPSL1827	Cytoplasmic	9.97
BPSL1828 ref|YP_108427.1|gi|53719441| hypothetical protein	BPSL1828	Cytoplasmic	8.96
BPSL1830 ref|YP_108429.1|gi|53719443| ribokinase	BPSL1830	Cytoplasmic	9.26
BPSL1831 ref|YP_108430.1|gi|53719444| ribose operon repressor	BPSL1831	Cytoplasmic	9.97
BPSL1835 ref|YP_108434.1|gi|53719448| transcriptional regulator CysB-like protein	BPSL1835	Cytoplasmic	9.97
BPSL1840 ref|YP_108439.1|gi|53719453| LexA repressor	BPSL1840	Cytoplasmic	9.97
BPSL1843 ref|YP_108442.1|gi|53719456| stress-like protein	BPSL1843	Cytoplasmic	8.96
BPSL1844 ref|YP_108443.1|gi|53719457| nodulation ABC transporter NodI	BPSL1844	Cytoplasmic	9.12
BPSL1846 ref|YP_108445.1|gi|53719459| hypothetical protein	BPSL1846	Cytoplasmic	8.96
BPSL1848 ref|YP_108447.1|gi|53719461| oxidoreductase	BPSL1848	Cytoplasmic	9.97
BPSL1849 ref|YP_108448.1|gi|53719462| hypothetical protein	BPSL1849	Cytoplasmic	9.26
BPSL1850 ref|YP_108449.1|gi|53719463| hypothetical protein	BPSL1850	Cytoplasmic	9.26
BPSL1852 ref|YP_108451.1|gi|53719465| tRNA-dihydrouridine synthase A	BPSL1852	Cytoplasmic	9.97
BPSL1858 ref|YP_108457.1|gi|53719471| alkanesulfonate monooxygenase	BPSL1858	Cytoplasmic	9.97
BPSL1860 ref|YP_108459.1|gi|53719473| 3-hydroxyisobutyryl-CoA hydrolase	BPSL1860	Cytoplasmic	9.97
BPSL1863 ref|YP_108462.1|gi|53719476| hypothetical protein	BPSL1863	Cytoplasmic	8.96
BPSL1865 ref|YP_108464.1|gi|53719478| arginyl-tRNA-protein transferase	BPSL1865	Cytoplasmic	9.26
BPSL1870 ref|YP_108469.1|gi|53719483| GntR family transcriptional regulator	BPSL1870	Cytoplasmic	9.97
BPSL1871 ref|YP_108470.1|gi|53719484| ribose-5-phosphate isomerase A	BPSL1871	Cytoplasmic	8.96
BPSL1873 ref|YP_108472.1|gi|53719486| tRNA/rRNA methyltransferase	BPSL1873	Cytoplasmic	9.26
BPSL1874 ref|YP_108473.1|gi|53719487| ribonuclease	BPSL1874	Cytoplasmic	9.97
BPSL1880 ref|YP_108479.1|gi|53719493| acetyltransferase	BPSL1880	Cytoplasmic	8.96
BPSL1883 ref|YP_108482.1|gi|53719496| acyl-CoA synthetase	BPSL1883	Cytoplasmic	9.97
BPSL1885A ref|YP_108485.1|gi|53719499| Hfq protein	BPSL1885A	Cytoplasmic	9.26
BPSL1887 ref|YP_108487.1|gi|53719501| sigma-54 related transcriptional regulatory protein	BPSL1887	Cytoplasmic	9.97
BPSL1893 ref|YP_108493.1|gi|53719507| type II/IV secretion system ATP-binding protein	BPSL1893	Cytoplasmic	9.97
BPSL1906 ref|YP_108506.1|gi|53719520| hypothetical protein	BPSL1906	Cytoplasmic	9.97
BPSL1907 ref|YP_108507.1|gi|53719521| dihydrolipoamide dehydrogenase	BPSL1907	Cytoplasmic	9.97
BPSL1908 ref|YP_108508.1|gi|53719522| dihydrolipoamide succinyltransferase	BPSL1908	Cytoplasmic	9.97
BPSL1909 ref|YP_108509.1|gi|53719523| 2-oxoglutarate dehydrogenase E1	BPSL1909	Cytoplasmic	9.97
BPSL1910 ref|YP_108510.1|gi|53719524| transposase	BPSL1910	Cytoplasmic	8.96
BPSL1912 ref|YP_108512.1|gi|53719526| transcriptional regulatory protein	BPSL1912	Cytoplasmic	9.26
BPSL1916 ref|YP_108516.1|gi|53719530| tRNA pseudouridine synthase B	BPSL1916	Cytoplasmic	9.97
BPSL1917 ref|YP_108517.1|gi|53719531| ribosome-binding factor A	BPSL1917	Cytoplasmic	9.26
BPSL1918 ref|YP_108518.1|gi|53719532| translation initiation factor IF-2	BPSL1918	Cytoplasmic	9.97
BPSL1919 ref|YP_108519.1|gi|53719533| transcription elongation factor NusA	BPSL1919	Cytoplasmic	9.97
BPSL1920 ref|YP_108520.1|gi|53719534| hypothetical protein	BPSL1920	Cytoplasmic	9.97
BPSL1921 ref|YP_108521.1|gi|53719535| hypothetical protein	BPSL1921	Cytoplasmic	9.26
BPSL1922 ref|YP_108522.1|gi|53719536| hypothetical protein	BPSL1922	Cytoplasmic	9.97
BPSL1923 ref|YP_108523.1|gi|53719537| transcriptional regulator	BPSL1923	Cytoplasmic	9.97
BPSL1932 ref|YP_108531.1|gi|53719545| transposase	BPSL1932	Cytoplasmic	8.96
BPSL1938 ref|YP_108537.1|gi|53719551| transcriptional regulator	BPSL1938	Cytoplasmic	8.96
BPSL1939 ref|YP_108538.1|gi|53719552| integration host factor subunit alpha	BPSL1939	Cytoplasmic	9.26
BPSL1940 ref|YP_108539.1|gi|53719553| phenylalanyl-tRNA synthetase subunit beta	BPSL1940	Cytoplasmic	9.97
BPSL1941 ref|YP_108540.2|gi|161723202| phenylalanyl-tRNA synthetase subunit alpha	BPSL1941	Cytoplasmic	10
BPSL1942 ref|YP_108541.1|gi|53719555| 50S ribosomal protein L20	BPSL1942	Cytoplasmic	9.26
BPSL1943 ref|YP_108542.1|gi|53719556| 50S ribosomal protein L35	BPSL1943	Cytoplasmic	9.26
BPSL1944 ref|YP_108543.1|gi|53719557| translation initiation factor IF-3	BPSL1944	Cytoplasmic	9.97
BPSL1945 ref|YP_108544.1|gi|53719558| threonyl-tRNA synthetase	BPSL1945	Cytoplasmic	10
BPSL1946 ref|YP_108545.1|gi|53719559| GTP pyrophosphokinase	BPSL1946	Cytoplasmic	8.96
BPSL1947 ref|YP_108546.1|gi|53719560| hypothetical protein	BPSL1947	Cytoplasmic	9.26
BPSL1953 ref|YP_108551.1|gi|53719565| short chain dehydrogenase	BPSL1953	Cytoplasmic	9.26
BPSL1954 ref|YP_108552.1|gi|53719566| succinyl-CoA:3-ketoacid-coenzyme A transferase subunit B	BPSL1954	Cytoplasmic	9.97
BPSL1955 ref|YP_108553.1|gi|53719567| succinyl-CoA:3-ketoacid-coenzyme A transferase subunit A	BPSL1955	Cytoplasmic	9.97
BPSL1956 ref|YP_108554.1|gi|53719568| LuxR family transcriptional regulator	BPSL1956	Cytoplasmic	8.96
BPSL1959 ref|YP_108557.1|gi|53719571| thioesterase	BPSL1959	Cytoplasmic	9.97
BPSL1960 ref|YP_108558.1|gi|53719572| short chain dehydrogenase	BPSL1960	Cytoplasmic	9.97
BPSL1962 ref|YP_108560.1|gi|53719574| chorismate synthase	BPSL1962	Cytoplasmic	9.97
BPSL1964 ref|YP_108562.1|gi|53719576| hypothetical protein	BPSL1964	Cytoplasmic	8.96
BPSL1969 ref|YP_108567.1|gi|53719581| FAD-binding reductase	BPSL1969	Cytoplasmic	9.97
BPSL1971 ref|YP_108569.1|gi|53719583| LysR family transcriptional regulator	BPSL1971	Cytoplasmic	9.97
BPSL1978 ref|YP_108576.1|gi|53719590| 5'-methylthioadenosine/S-adenosylhomocysteine nucleosidase	BPSL1978	Cytoplasmic	8.96
BPSL1979 ref|YP_108577.1|gi|53719591| helicase	BPSL1979	Cytoplasmic	9.97
BPSL1980 ref|YP_108578.1|gi|53719592| valyl-tRNA synthetase	BPSL1980	Cytoplasmic	9.97
BPSL1981 ref|YP_108579.1|gi|53719593| UTP-glucose-1-phosphate uridylyltransferase	BPSL1981	Cytoplasmic	9.97
BPSL1985 ref|YP_108583.1|gi|53719597| two component system response regulator	BPSL1985	Cytoplasmic	9.97
BPSL1986 ref|YP_108584.1|gi|53719598| hypothetical protein	BPSL1986	Cytoplasmic	8.96
BPSL1987 ref|YP_108585.1|gi|53719599| hypothetical protein	BPSL1987	Cytoplasmic	9.26
BPSL1990 ref|YP_108588.1|gi|53719602| transcriptional regulatory protein	BPSL1990	Cytoplasmic	8.96
BPSL1994 ref|YP_108592.1|gi|53719606| carbohydrate kinase	BPSL1994	Cytoplasmic	8.96
BPSL1995 ref|YP_108593.1|gi|53719607| TPP-binding acetolactate synthase	BPSL1995	Cytoplasmic	9.26
BPSL1996 ref|YP_108594.1|gi|53719608| amine catabolism-like protein	BPSL1996	Cytoplasmic	8.96
BPSL1997 ref|YP_108595.1|gi|53719609| hypothetical protein	BPSL1997	Cytoplasmic	8.96
BPSL2001 ref|YP_108599.1|gi|53719613| thioesterase	BPSL2001	Cytoplasmic	9.26
BPSL2002 ref|YP_108600.1|gi|53719614| iron-containing alcohol dehydrogenase	BPSL2002	Cytoplasmic	9.97
BPSL2004 ref|YP_108602.1|gi|53719616| phosphatase	BPSL2004	Cytoplasmic	8.96
BPSL2005 ref|YP_108603.1|gi|53719617| hypothetical protein	BPSL2005	Cytoplasmic	8.96
BPSL2008 ref|YP_108606.1|gi|53719620| LysR family transcriptional regulator	BPSL2008	Cytoplasmic	9.97
BPSL2009 ref|YP_108607.1|gi|53719621| alanyl-tRNA synthetase	BPSL2009	Cytoplasmic	10
BPSL2010 ref|YP_108608.1|gi|53719622| lipid metabolism-like protein	BPSL2010	Cytoplasmic	9.97
BPSL2012 ref|YP_108610.1|gi|53719624| glutaminyl-tRNA synthetase	BPSL2012	Cytoplasmic	9.97
BPSL2016 ref|YP_108614.1|gi|53719628| hypothetical protein	BPSL2016	Cytoplasmic	8.96
BPSL2019 ref|YP_108617.1|gi|53719631| trans-2-enoyl-CoA reductase	BPSL2019	Cytoplasmic	9.97
BPSL2024 ref|YP_108621.1|gi|53719635| two component regulatory system response regulator	BPSL2024	Cytoplasmic	9.26
BPSL2032 ref|YP_108629.1|gi|53719643| LysR family transcriptional regulator	BPSL2032	Cytoplasmic	9.97
BPSL2034 ref|YP_108631.1|gi|53719645| hydrolase	BPSL2034	Cytoplasmic	8.96
BPSL2040 ref|YP_108637.1|gi|53719651| hypothetical protein	BPSL2040	Cytoplasmic	8.96
BPSL2047 ref|YP_108645.1|gi|53719659| hypothetical protein	BPSL2047	Cytoplasmic	8.96
BPSL2049 ref|YP_108648.1|gi|53719662| hypothetical protein	BPSL2049	Cytoplasmic	8.96
BPSL2050 ref|YP_108649.1|gi|53719663| hypothetical protein	BPSL2050	Cytoplasmic	9.26
BPSL2053 ref|YP_108652.1|gi|53719666| hypothetical protein	BPSL2053	Cytoplasmic	8.96
BPSL2054 ref|YP_108653.1|gi|53719667| hypothetical protein	BPSL2054	Cytoplasmic	8.96
BPSL2055 ref|YP_108654.1|gi|53719668| hypothetical protein	BPSL2055	Cytoplasmic	8.96
BPSL2060 ref|YP_108659.1|gi|53719673| hypothetical protein	BPSL2060	Cytoplasmic	8.96
BPSL2065 ref|YP_108664.1|gi|53719678| two component system response regulator	BPSL2065	Cytoplasmic	9.97
BPSL2068 ref|YP_108667.1|gi|53719681| two component system response regulator	BPSL2068	Cytoplasmic	9.97
BPSL2069 ref|YP_108668.1|gi|53719682| LysR family transcriptional regulator	BPSL2069	Cytoplasmic	9.97
BPSL2074 ref|YP_108673.1|gi|53719687| alpha-amylase-like protein	BPSL2074	Cytoplasmic	9.97
BPSL2075 ref|YP_108674.1|gi|53719688| trehalose synthase	BPSL2075	Cytoplasmic	9.97
BPSL2076 ref|YP_108675.1|gi|53719689| glycogen branching enzyme	BPSL2076	Cytoplasmic	9.97
BPSL2077 ref|YP_108676.1|gi|53719690| glycogen operon-like protein	BPSL2077	Cytoplasmic	9.26
BPSL2078 ref|YP_108677.1|gi|53719691| trehalose trehalohydrolase	BPSL2078	Cytoplasmic	9.97
BPSL2079 ref|YP_108678.1|gi|53719692| glucanotransferase	BPSL2079	Cytoplasmic	9.26
BPSL2080 ref|YP_108679.1|gi|53719693| glycosyl hydrolase	BPSL2080	Cytoplasmic	9.97
BPSL2083 ref|YP_108682.1|gi|53719696| GntR family transcriptional regulator	BPSL2083	Cytoplasmic	9.97
BPSL2084 ref|YP_108683.1|gi|53719697| hypothetical protein	BPSL2084	Cytoplasmic	8.96
BPSL2094 ref|YP_108691.1|gi|53719705| osmolarity response regulator	BPSL2094	Cytoplasmic	9.97
BPSL2096 ref|YP_108693.1|gi|53719707| hydroperoxide reductase	BPSL2096	Cytoplasmic	9.97
BPSL2097 ref|YP_108694.1|gi|53719708| hypothetical protein	BPSL2097	Cytoplasmic	8.96
BPSL2098 ref|YP_108695.1|gi|53719709| 2-C-methyl-D-erythritol 2,4-cyclodiphosphate synthase	BPSL2098	Cytoplasmic	9.97
BPSL2099 ref|YP_108696.1|gi|53719710| 2-C-methyl-D-erythritol 4-phosphate cytidylyltransferase	BPSL2099	Cytoplasmic	9.26
BPSL2100 ref|YP_108697.1|gi|53719711| transcription-repair coupling factor	BPSL2100	Cytoplasmic	9.97
BPSL2101 ref|YP_108698.2|gi|161723201| acetylornithine deacetylase	BPSL2101	Cytoplasmic	9.97
BPSL2102 ref|YP_108699.1|gi|53719713| threonine dehydratase	BPSL2102	Cytoplasmic	9.97
BPSL2108 ref|YP_108705.1|gi|53719719| hypothetical protein	BPSL2108	Cytoplasmic	8.96
BPSL2109 ref|YP_108706.1|gi|53719720| glyoxylate-like oxidoreductase	BPSL2109	Cytoplasmic	9.26
BPSL2111 ref|YP_108708.1|gi|53719722| LysR family transcriptional regulator	BPSL2111	Cytoplasmic	9.97
BPSL2112 ref|YP_108709.1|gi|53719723| hydroxydechloroatrazine ethylaminohydrolase	BPSL2112	Cytoplasmic	9.97
BPSL2116 ref|YP_108713.1|gi|53719727| allantoicase	BPSL2116	Cytoplasmic	9.97
BPSL2117 ref|YP_108714.1|gi|53719728| uricase	BPSL2117	Cytoplasmic	8.96
BPSL2118 ref|YP_108715.1|gi|53719729| hypothetical protein	BPSL2118	Cytoplasmic	9.97
BPSL2119 ref|YP_108716.1|gi|53719730| amino acid racemase	BPSL2119	Cytoplasmic	8.96
BPSL2121 ref|YP_108718.1|gi|53719732| GntR family transcriptional regulator	BPSL2121	Cytoplasmic	9.97
BPSL2122 ref|YP_108719.1|gi|53719733| L,D-carboxypeptidase A	BPSL2122	Cytoplasmic	9.97
BPSL2123 ref|YP_108720.1|gi|53719734| deaminase	BPSL2123	Cytoplasmic	9.97
BPSL2124 ref|YP_108721.1|gi|53719735| hypothetical protein	BPSL2124	Cytoplasmic	8.96
BPSL2125 ref|YP_108722.1|gi|53719736| hypothetical protein	BPSL2125	Cytoplasmic	9.26
BPSL2127 ref|YP_108724.1|gi|53719738| GMP synthase	BPSL2127	Cytoplasmic	9.97
BPSL2129 ref|YP_108726.1|gi|53719740| inosine 5'-monophosphate dehydrogenase	BPSL2129	Cytoplasmic	9.97
BPSL2130 ref|YP_108727.1|gi|53719741| hypothetical protein	BPSL2130	Cytoplasmic	9.26
BPSL2133 ref|YP_108728.1|gi|53719742| hypothetical protein	BPSL2133	Cytoplasmic	8.96
BPSL2136 ref|YP_108731.1|gi|53719745| hypothetical protein	BPSL2136	Cytoplasmic	8.96
BPSL2137 ref|YP_108732.1|gi|53719746| SsrA-binding protein	BPSL2137	Cytoplasmic	8.96
BPSL2140 ref|YP_108735.1|gi|53719749| phosphoenolpyruvate synthase	BPSL2140	Cytoplasmic	9.97
BPSL2143 ref|YP_108738.1|gi|53719752| hypothetical protein	BPSL2143	Cytoplasmic	9.97
BPSL2144 ref|YP_108739.1|gi|53719753| RNA methylase	BPSL2144	Cytoplasmic	9.26
BPSL2145 ref|YP_108740.1|gi|53719754| ribonuclease HII	BPSL2145	Cytoplasmic	9.97
BPSL2146 ref|YP_108741.1|gi|53719755| lipid-A-disaccharide synthase	BPSL2146	Cytoplasmic	9.97
BPSL2147 ref|YP_108742.1|gi|53719756| UDP-N-acetylglucosamine acyltransferase	BPSL2147	Cytoplasmic	9.97
BPSL2148 ref|YP_108743.1|gi|53719757| (3R)-hydroxymyristoyl-ACP dehydratase	BPSL2148	Cytoplasmic	9.97
BPSL2149 ref|YP_108744.1|gi|53719758| UDP-3-O-[3-hydroxymyristoyl] glucosamine N-acyltransferase	BPSL2149	Cytoplasmic	9.97
BPSL2155 ref|YP_108750.1|gi|53719764| undecaprenyl pyrophosphate synthetase	BPSL2155	Cytoplasmic	9.97
BPSL2156 ref|YP_108751.1|gi|53719765| ribosome recycling factor	BPSL2156	Cytoplasmic	9.97
BPSL2157 ref|YP_108752.1|gi|53719766| uridylate kinase	BPSL2157	Cytoplasmic	9.26
BPSL2158 ref|YP_108753.1|gi|53719767| elongation factor Ts	BPSL2158	Cytoplasmic	10
BPSL2159 ref|YP_108754.1|gi|53719768| 30S ribosomal protein S2	BPSL2159	Cytoplasmic	9.97
BPSL2160 ref|YP_108755.1|gi|53719769| methionine aminopeptidase	BPSL2160	Cytoplasmic	9.97
BPSL2161 ref|YP_108756.1|gi|53719770| PII uridylyl-transferase	BPSL2161	Cytoplasmic	9.97
BPSL2162 ref|YP_108757.1|gi|53719771| pseudouridylate synthase	BPSL2162	Cytoplasmic	9.97
BPSL2163 ref|YP_108758.1|gi|53719772| peptide deformylase	BPSL2163	Cytoplasmic	9.97
BPSL2164 ref|YP_108759.1|gi|53719773| DNA ligase	BPSL2164	Cytoplasmic	9.97
BPSL2165 ref|YP_108760.1|gi|53719774| hypothetical protein	BPSL2165	Cytoplasmic	8.96
BPSL2166 ref|YP_108761.1|gi|53719775| chromosome partition protein	BPSL2166	Cytoplasmic	9.97
BPSL2169 ref|YP_108764.1|gi|53719778| 2,3,4,5-tetrahydropyridine-2,6-carboxylate N-succinyltransferase	BPSL2169	Cytoplasmic	9.97
BPSL2171 ref|YP_108766.1|gi|53719780| succinyl-diaminopimelate desuccinylase	BPSL2171	Cytoplasmic	9.97
BPSL2172 ref|YP_108767.1|gi|53719781| N5-glutamine S-adenosyl-L-methionine-dependent methyltransferase	BPSL2172	Cytoplasmic	9.97
BPSL2175 ref|YP_108770.1|gi|53719784| glutathione peroxidase	BPSL2175	Cytoplasmic	9.26
BPSL2176 ref|YP_108771.1|gi|53719785| ABC transporter ATP-binding protein	BPSL2176	Cytoplasmic	9.97
BPSL2178 ref|YP_108773.1|gi|53719787| DNA repair protein RadA	BPSL2178	Cytoplasmic	8.96
BPSL2179 ref|YP_108774.1|gi|53719788| alanine racemase	BPSL2179	Cytoplasmic	9.97
BPSL2184 ref|YP_108779.1|gi|53719793| ribosomal-protein acetyltransferase	BPSL2184	Cytoplasmic	9.97
BPSL2187 ref|YP_108782.1|gi|53719796| ATP-dependent RNA helicase	BPSL2187	Cytoplasmic	9.26
BPSL2188 ref|YP_108783.1|gi|53719797| isocitrate lyase	BPSL2188	Cytoplasmic	9.97
BPSL2189 ref|YP_108784.1|gi|53719798| universal stress protein family protein	BPSL2189	Cytoplasmic	8.96
BPSL2191 ref|YP_108786.1|gi|53719800| dehalogenase	BPSL2191	Cytoplasmic	9.26
BPSL2192 ref|YP_108787.1|gi|53719801| malate synthase	BPSL2192	Cytoplasmic	9.97
BPSL2193 ref|YP_108788.1|gi|53719802| hypothetical protein	BPSL2193	Cytoplasmic	8.96
BPSL2194 ref|YP_108789.1|gi|53719803| ribonuclease activity regulator protein RraA	BPSL2194	Cytoplasmic	9.26
BPSL2195 ref|YP_108790.1|gi|53719804| AraC family transcriptional regulator	BPSL2195	Cytoplasmic	9.26
BPSL2197 ref|YP_108792.1|gi|53719806| glutamyl-tRNA synthetase	BPSL2197	Cytoplasmic	10
BPSL2207 ref|YP_108802.1|gi|53719816| molybdopterin oxidoreductase	BPSL2207	Cytoplasmic	9.97
BPSL2208 ref|YP_108803.1|gi|53719817| ferredoxin-NADP reductase	BPSL2208	Cytoplasmic	9.97
BPSL2209 ref|YP_108804.1|gi|53719818| molybdenum cofactor biosynthesis protein A	BPSL2209	Cytoplasmic	9.97
BPSL2210 ref|YP_108805.1|gi|53719819| ferredoxin I	BPSL2210	Cytoplasmic	9.26
BPSL2211 ref|YP_108806.1|gi|53719820| TetR family regulatory protein	BPSL2211	Cytoplasmic	9.26
BPSL2212 ref|YP_108807.1|gi|53719821| methionine aminopeptidase 2	BPSL2212	Cytoplasmic	9.97
BPSL2214 ref|YP_108809.1|gi|53719823| argininosuccinate lyase	BPSL2214	Cytoplasmic	9.97
BPSL2215 ref|YP_108810.1|gi|53719824| cysteine synthesis-like protein	BPSL2215	Cytoplasmic	9.97
BPSL2216 ref|YP_108811.1|gi|53719825| hypothetical protein	BPSL2216	Cytoplasmic	8.96
BPSL2217 ref|YP_108812.1|gi|53719826| sulfate adenylyltransferase subunit 2	BPSL2217	Cytoplasmic	9.97
BPSL2218 ref|YP_108813.1|gi|53719827| hypothetical protein	BPSL2218	Cytoplasmic	8.96
BPSL2219 ref|YP_108814.1|gi|53719828| phosphoserine aminotransferase	BPSL2219	Cytoplasmic	9.26
BPSL2221 ref|YP_108816.1|gi|53719830| hypothetical protein	BPSL2221	Cytoplasmic	8.96
BPSL2222 ref|YP_108817.1|gi|53719831| transketolase	BPSL2222	Cytoplasmic	9.97
BPSL2223 ref|YP_108818.1|gi|53719832| transketolase	BPSL2223	Cytoplasmic	9.97
BPSL2224 ref|YP_108819.1|gi|53719833| hypothetical protein	BPSL2224	Cytoplasmic	8.96
BPSL2225 ref|YP_108820.1|gi|53719834| hypothetical protein	BPSL2225	Cytoplasmic	8.96
BPSL2226 ref|YP_108821.1|gi|53719835| hypothetical protein	BPSL2226	Cytoplasmic	8.96
BPSL2227 ref|YP_108822.1|gi|53719836| sulfur metabolism-like protein	BPSL2227	Cytoplasmic	9.26
BPSL2228 ref|YP_108823.1|gi|53719837| hypothetical protein	BPSL2228	Cytoplasmic	8.96
BPSL2230 ref|YP_108825.1|gi|53719839| hypothetical protein	BPSL2230	Cytoplasmic	8.96
BPSL2232 ref|YP_108827.1|gi|53719841| non-ribosomal peptide synthase	BPSL2232	Cytoplasmic	9.97
BPSL2233 ref|YP_108828.1|gi|53719842| adenylylsulfate kinase	BPSL2233	Cytoplasmic	9.97
BPSL2238 ref|YP_108833.1|gi|53719847| hypothetical protein	BPSL2238	Cytoplasmic	8.96
BPSL2239 ref|YP_108834.1|gi|53719848| aspartate kinase	BPSL2239	Cytoplasmic	8.96
BPSL2240 ref|YP_108835.1|gi|53719849| cell cycle protein	BPSL2240	Cytoplasmic	9.26
BPSL2241 ref|YP_108836.1|gi|53719850| acetyl-CoA carboxylase carboxyltransferase subunit alpha	BPSL2241	Cytoplasmic	9.26
BPSL2242 ref|YP_108837.1|gi|53719851| HhH-GPD superfamily base excision DNA repair protein	BPSL2242	Cytoplasmic	8.96
BPSL2243 ref|YP_108838.1|gi|53719852| cysteinyl-tRNA synthetase	BPSL2243	Cytoplasmic	10
BPSL2246 ref|YP_108841.1|gi|53719855| peptidyl-prolyl cis-trans isomerase B	BPSL2246	Cytoplasmic	9.97
BPSL2247 ref|YP_108842.1|gi|53719856| UDP-2,3-diacylglucosamine hydrolase	BPSL2247	Cytoplasmic	9.97
BPSL2248 ref|YP_108843.1|gi|53719857| serine acetyltransferase	BPSL2248	Cytoplasmic	9.97
BPSL2249 ref|YP_108844.1|gi|53719858| tRNA/rRNA methyltransferase	BPSL2249	Cytoplasmic	9.97
BPSL2250 ref|YP_108845.1|gi|53719859| inositol monophosphatase	BPSL2250	Cytoplasmic	9.97
BPSL2252 ref|YP_108847.1|gi|53719861| DNA mismatch repair protein MutS	BPSL2252	Cytoplasmic	9.97
BPSL2254 ref|YP_108849.1|gi|53719863| FkbP-type peptidyl-prolyl cis-trans isomerase	BPSL2254	Cytoplasmic	9.97
BPSL2255 ref|YP_108850.1|gi|53719864| hypothetical protein	BPSL2255	Cytoplasmic	9.97
BPSL2256 ref|YP_108852.1|gi|53719866| hypothetical protein	BPSL2256	Cytoplasmic	9.26
BPSL2258 ref|YP_108854.1|gi|53719868| dihydrodipicolinate synthase	BPSL2258	Cytoplasmic	9.97
BPSL2259 ref|YP_108855.1|gi|53719869| hypothetical protein	BPSL2259	Cytoplasmic	8.96
BPSL2260 ref|YP_108856.1|gi|53719870| tryptophanyl-tRNA synthetase	BPSL2260	Cytoplasmic	9.97
BPSL2262 ref|YP_108858.1|gi|53719872| hypothetical protein	BPSL2262	Cytoplasmic	8.96
BPSL2263 ref|YP_108859.1|gi|53719873| hypothetical protein	BPSL2263	Cytoplasmic	9.26
BPSL2264 ref|YP_108860.1|gi|53719874| hydrolase	BPSL2264	Cytoplasmic	9.97
BPSL2265 ref|YP_108861.1|gi|53719875| hypothetical protein	BPSL2265	Cytoplasmic	8.96
BPSL2266 ref|YP_108862.1|gi|53719876| hypothetical protein	BPSL2266	Cytoplasmic	9.26
BPSL2267 ref|YP_108863.1|gi|53719877| Hsp33 chaperonin	BPSL2267	Cytoplasmic	9.97
BPSL2270 ref|YP_108866.1|gi|53719880| phosphopyruvate hydratase	BPSL2270	Cytoplasmic	10
BPSL2271 ref|YP_108867.1|gi|53719881| 2-dehydro-3-deoxyphosphooctonate aldolase	BPSL2271	Cytoplasmic	9.97
BPSL2272 ref|YP_108868.1|gi|53719882| CTP synthetase	BPSL2272	Cytoplasmic	9.97
BPSL2273 ref|YP_108869.1|gi|53719883| hypothetical protein	BPSL2273	Cytoplasmic	9.97
BPSL2275 ref|YP_108871.1|gi|53719885| TatD related DNase	BPSL2275	Cytoplasmic	9.26
BPSL2278 ref|YP_108874.1|gi|53719888| hypothetical protein	BPSL2278	Cytoplasmic	8.96
BPSL2279 ref|YP_108875.1|gi|53719889| single-stranded-DNA-specific exonuclease	BPSL2279	Cytoplasmic	9.97
BPSL2280 ref|YP_108876.1|gi|53719890| peptide chain release factor 2	BPSL2280	Cytoplasmic	8.96
BPSL2281 ref|YP_108877.1|gi|53719891| lysyl-tRNA synthetase	BPSL2281	Cytoplasmic	10
BPSL2284 ref|YP_108880.1|gi|53719894| (2Fe-2S) ferredoxin	BPSL2284	Cytoplasmic	8.96
BPSL2285 ref|YP_108881.1|gi|53719895| chaperone protein HscA	BPSL2285	Cytoplasmic	9.97
BPSL2286 ref|YP_108882.1|gi|53719896| co-chaperone HscB	BPSL2286	Cytoplasmic	9.97
BPSL2287 ref|YP_108883.1|gi|53719897| HesB family protein	BPSL2287	Cytoplasmic	9.97
BPSL2288 ref|YP_108884.1|gi|53719898| scaffold protein	BPSL2288	Cytoplasmic	9.26
BPSL2289 ref|YP_108885.1|gi|53719899| cysteine desulfurase	BPSL2289	Cytoplasmic	9.97
BPSL2291 ref|YP_108887.1|gi|53719901| low molecular weight phosphotyrosine protein phosphatase	BPSL2291	Cytoplasmic	9.97
BPSL2293 ref|YP_108889.1|gi|53719903| iron-sulfur binding protein	BPSL2293	Cytoplasmic	8.96
BPSL2294 ref|YP_108890.1|gi|53719904| hypothetical protein	BPSL2294	Cytoplasmic	8.96
BPSL2295 ref|YP_108891.1|gi|53719905| IclR family transcriptional regulator	BPSL2295	Cytoplasmic	9.97
BPSL2296 ref|YP_108892.1|gi|53719906| transposase	BPSL2296	Cytoplasmic	8.96
BPSL2299 ref|YP_108895.1|gi|53719909| dihydrolipoamide dehydrogenase	BPSL2299	Cytoplasmic	9.97
BPSL2300 ref|YP_108896.1|gi|53719910| dihydrolipoamide acetyltransferase	BPSL2300	Cytoplasmic	9.97
BPSL2301 ref|YP_108897.1|gi|53719911| pyruvate dehydrogenase subunit E1	BPSL2301	Cytoplasmic	9.97
BPSL2303 ref|YP_108899.1|gi|53719913| response regulator protein	BPSL2303	Cytoplasmic	9.97
BPSL2304 ref|YP_108900.1|gi|53719914| bifunctional 5,10-methylene-tetrahydrofolate dehydrogenase/ 5,10-methylene-tetrahydrofolate cyclohydrolase	BPSL2304	Cytoplasmic	9.97
BPSL2305 ref|YP_108901.1|gi|53719915| oligopeptidase A	BPSL2305	Cytoplasmic	9.97
BPSL2306 ref|YP_108902.2|gi|161723200| DNA polymerase IV	BPSL2306	Cytoplasmic	9.97
BPSL2311 ref|YP_108907.1|gi|53719921| respiratory nitrate reductase delta chain	BPSL2311	Cytoplasmic	9.97
BPSL2314 ref|YP_108910.1|gi|53719924| response regulator protein	BPSL2314	Cytoplasmic	9.97
BPSL2315 ref|YP_108911.1|gi|53719925| hypothetical protein	BPSL2315	Cytoplasmic	9.26
BPSL2316 ref|YP_108912.1|gi|53719926| nitrogen regulation protein NR(I)	BPSL2316	Cytoplasmic	9.97
BPSL2318 ref|YP_108914.1|gi|53719928| glutamine synthetase	BPSL2318	Cytoplasmic	9.97
BPSL2320 ref|YP_108916.1|gi|53719930| hypothetical protein	BPSL2320	Cytoplasmic	8.96
BPSL2325 ref|YP_108921.1|gi|53719935| N-acetylglutamate synthase	BPSL2325	Cytoplasmic	9.97
BPSL2328 ref|YP_108924.1|gi|53719938| CAIB/BAIF family protein	BPSL2328	Cytoplasmic	9.97
BPSL2329 ref|YP_108925.1|gi|53719939| acyl-CoA dehydrogenase	BPSL2329	Cytoplasmic	9.97
BPSL2330 ref|YP_108926.1|gi|53719940| LysR family transcriptional regulator	BPSL2330	Cytoplasmic	9.97
BPSL2332 ref|YP_108928.1|gi|53719942| hypothetical protein	BPSL2332	Cytoplasmic	8.96
BPSL2333 ref|YP_108929.1|gi|53719943| hypothetical protein	BPSL2333	Cytoplasmic	8.96
BPSL2335 ref|YP_108931.1|gi|53719945| aminotransferase	BPSL2335	Cytoplasmic	9.97
BPSL2336 ref|YP_108932.1|gi|53719946| glutamine synthetase	BPSL2336	Cytoplasmic	9.97
BPSL2339 ref|YP_108935.1|gi|53719949| N-formimino-L-glutamate deiminase	BPSL2339	Cytoplasmic	9.97
BPSL2340 ref|YP_108936.1|gi|53719950| imidazolonepropionase	BPSL2340	Cytoplasmic	9.97
BPSL2342 ref|YP_108938.1|gi|53719952| urocanate hydratase	BPSL2342	Cytoplasmic	9.97
BPSL2343 ref|YP_108939.1|gi|53719953| histidine utilization repressor	BPSL2343	Cytoplasmic	9.97
BPSL2344 ref|YP_108940.1|gi|53719954| histidine ammonia-lyase	BPSL2344	Cytoplasmic	9.26
BPSL2347 ref|YP_108943.1|gi|53719957| LuxR family transcriptional regulator	BPSL2347	Cytoplasmic	9.97
BPSL2356 ref|YP_108949.1|gi|53719963| anaerobic ribonucleoside triphosphate reductase	BPSL2356	Cytoplasmic	9.97
BPSL2358 ref|YP_108951.1|gi|53719965| pyruvate radical-activating enzyme	BPSL2358	Cytoplasmic	9.26
BPSL2359 ref|YP_108952.1|gi|53719966| hypothetical protein	BPSL2359	Cytoplasmic	8.96
BPSL2361 ref|YP_108954.1|gi|53719968| hypothetical protein	BPSL2361	Cytoplasmic	8.96
BPSL2362 ref|YP_108955.1|gi|53719969| hypothetical protein	BPSL2362	Cytoplasmic	8.96
BPSL2363 ref|YP_108956.1|gi|53719970| 2-nitropropane dioxygenase	BPSL2363	Cytoplasmic	8.96
BPSL2365 ref|YP_108958.1|gi|53719972| regulatory protein	BPSL2365	Cytoplasmic	9.97
BPSL2366 ref|YP_108959.1|gi|53719973| coproporphyrinogen III oxidase	BPSL2366	Cytoplasmic	9.97
BPSL2369 ref|YP_108962.1|gi|53719976| cysteine desulfurase activator complex subunit SufB	BPSL2369	Cytoplasmic	8.96
BPSL2373 ref|YP_108966.1|gi|53719980| hypothetical protein	BPSL2373	Cytoplasmic	9.97
BPSL2374 ref|YP_108967.1|gi|53719981| hypothetical protein	BPSL2374	Cytoplasmic	8.96
BPSL2376 ref|YP_108969.1|gi|53719983| DNA-binding protein	BPSL2376	Cytoplasmic	8.96
BPSL2377 ref|YP_108970.1|gi|53719984| cation-binding hemerythrin HHE family protein	BPSL2377	Cytoplasmic	8.96
BPSL2386 ref|YP_108978.1|gi|53719992| succinylarginine dihydrolase	BPSL2386	Cytoplasmic	9.26
BPSL2387 ref|YP_108979.1|gi|53719993| succinylglutamic semialdehyde dehydrogenase	BPSL2387	Cytoplasmic	9.97
BPSL2388 ref|YP_108980.1|gi|53719994| arginine N-succinyltransferase subunit beta	BPSL2388	Cytoplasmic	9.97
BPSL2389 ref|YP_108981.1|gi|53719995| arginine N-succinyltransferase subunit alpha	BPSL2389	Cytoplasmic	9.97
BPSL2390 ref|YP_108982.1|gi|53719996| bifunctional N-succinyldiaminopimelate-aminotransferase/acetylornithine transaminase	BPSL2390	Cytoplasmic	9.97
BPSL2391 ref|YP_108983.1|gi|53719997| AraC family transcriptional regulator	BPSL2391	Cytoplasmic	9.26
BPSL2397 ref|YP_108989.1|gi|53720003| hypothetical protein	BPSL2397	Cytoplasmic	8.96
BPSL2398 ref|YP_108990.1|gi|53720004| hypothetical protein	BPSL2398	Cytoplasmic	8.96
BPSL2400 ref|YP_108992.1|gi|53720006| luciferase-like monooxygenase	BPSL2400	Cytoplasmic	9.26
BPSL2401 ref|YP_108993.1|gi|53720007| hydrolase	BPSL2401	Cytoplasmic	9.26
BPSL2402 ref|YP_108994.1|gi|53720008| pyridoxamine kinase	BPSL2402	Cytoplasmic	9.97
BPSL2408 ref|YP_109000.1|gi|53720014| group 1 glycosyl transferase	BPSL2408	Cytoplasmic	8.96
BPSL2410 ref|YP_109002.1|gi|53720016| alpha,alpha-trehalose-phosphate synthase	BPSL2410	Cytoplasmic	9.97
BPSL2411 ref|YP_109003.1|gi|53720017| trehalose-phosphatase	BPSL2411	Cytoplasmic	8.96
BPSL2415 ref|YP_109007.1|gi|53720021| hypothetical protein	BPSL2415	Cytoplasmic	9.26
BPSL2416 ref|YP_109008.1|gi|53720022| hypothetical protein	BPSL2416	Cytoplasmic	9.97
BPSL2417 ref|YP_109009.1|gi|53720023| LysR family transcriptional regulator	BPSL2417	Cytoplasmic	9.97
BPSL2420 ref|YP_109012.1|gi|53720026| excinuclease ABC subunit C	BPSL2420	Cytoplasmic	9.97
BPSL2421 ref|YP_109013.1|gi|53720027| hypothetical protein	BPSL2421	Cytoplasmic	8.96
BPSL2422 ref|YP_109014.1|gi|53720028| elongation factor P	BPSL2422	Cytoplasmic	10
BPSL2423 ref|YP_109015.1|gi|53720029| sigma-54 interacting response regulator protein	BPSL2423	Cytoplasmic	9.97
BPSL2424 ref|YP_109016.1|gi|53720030| beta-hexosaminidase	BPSL2424	Cytoplasmic	9.97
BPSL2426 ref|YP_109018.1|gi|53720032| pyridoxine 5'-phosphate synthase	BPSL2426	Cytoplasmic	9.97
BPSL2427 ref|YP_109019.2|gi|161723199| DNA repair protein RecO	BPSL2427	Cytoplasmic	9.26
BPSL2429 ref|YP_109021.1|gi|53720035| ribonuclease III	BPSL2429	Cytoplasmic	9.97
BPSL2436 ref|YP_109028.1|gi|53720042| RNA polymerase sigma factor RpoE	BPSL2436	Cytoplasmic	9.97
BPSL2439 ref|YP_109031.1|gi|53720045| acyl carrier protein	BPSL2439	Cytoplasmic	9.97
BPSL2440 ref|YP_109032.1|gi|53720046| 3-ketoacyl-ACP reductase	BPSL2440	Cytoplasmic	9.97
BPSL2441 ref|YP_109033.1|gi|53720047| ACP S-malonyltransferase	BPSL2441	Cytoplasmic	9.97
BPSL2442 ref|YP_109034.1|gi|53720048| 3-oxoacyl-ACP synthase	BPSL2442	Cytoplasmic	9.26
BPSL2443 ref|YP_109035.1|gi|53720049| glycerol-3-phosphate acyltransferase PlsX	BPSL2443	Cytoplasmic	9.97
BPSL2444 ref|YP_109036.1|gi|53720050| 50S ribosomal protein L32	BPSL2444	Cytoplasmic	9.26
BPSL2445 ref|YP_109037.1|gi|53720051| hypothetical protein	BPSL2445	Cytoplasmic	8.96
BPSL2446 ref|YP_109038.1|gi|53720052| Maf-like protein	BPSL2446	Cytoplasmic	9.97
BPSL2450 ref|YP_109042.1|gi|53720056| haloacid dehalogenase	BPSL2450	Cytoplasmic	9.26
BPSL2451 ref|YP_109043.1|gi|53720057| ribosomal large subunit pseudouridine synthase C	BPSL2451	Cytoplasmic	9.97
BPSL2452 ref|YP_109044.1|gi|53720058| ribonuclease E	BPSL2452	Cytoplasmic	9.97
BPSL2453 ref|YP_109045.1|gi|53720059| molybdenum cofactor biosynthesis protein A	BPSL2453	Cytoplasmic	9.97
BPSL2454 ref|YP_109046.1|gi|53720060| molybdopterin-guanine dinucleotide biosynthesis protein MobA	BPSL2454	Cytoplasmic	9.26
BPSL2455 ref|YP_109047.1|gi|53720061| molybdopterin biosynthesis protein	BPSL2455	Cytoplasmic	9.26
BPSL2457 ref|YP_109049.1|gi|53720063| acetyltransferase	BPSL2457	Cytoplasmic	9.26
BPSL2459 ref|YP_109051.1|gi|53720065| 2-hydroxyacid dehydrogenase	BPSL2459	Cytoplasmic	9.26
BPSL2461 ref|YP_109053.1|gi|53720067| hypothetical protein	BPSL2461	Cytoplasmic	8.96
BPSL2462 ref|YP_109054.1|gi|53720068| nicotinate phosphoribosyltransferase	BPSL2462	Cytoplasmic	9.97
BPSL2463 ref|YP_109055.1|gi|53720069| ferredoxin	BPSL2463	Cytoplasmic	9.97
BPSL2465 ref|YP_109057.1|gi|53720071| hypothetical protein	BPSL2465	Cytoplasmic	8.96
BPSL2469 ref|YP_109061.1|gi|53720075| fumarate hydratase	BPSL2469	Cytoplasmic	9.97
BPSL2470 ref|YP_109062.1|gi|53720076| long-chain acyl-CoA thioester hydrolase	BPSL2470	Cytoplasmic	8.96
BPSL2473 ref|YP_109066.1|gi|53720080| thymidylate synthase	BPSL2473	Cytoplasmic	9.97
BPSL2474 ref|YP_109067.1|gi|53720081| sigma-54 interacting regulatory protein	BPSL2474	Cytoplasmic	9.97
BPSL2475 ref|YP_109070.1|gi|53720084| sigma-54 dependent regulatory protein	BPSL2475	Cytoplasmic	9.97
BPSL2477 ref|YP_109072.1|gi|53720086| transposase	BPSL2477	Cytoplasmic	8.96
BPSL2478 ref|YP_109073.1|gi|53720087| microcin-processing peptidase	BPSL2478	Cytoplasmic	9.26
BPSL2479 ref|YP_109074.1|gi|53720088| hypothetical protein	BPSL2479	Cytoplasmic	9.97
BPSL2480 ref|YP_109075.1|gi|53720089| molybdenum cofactor biosynthesis protein MogA	BPSL2480	Cytoplasmic	9.97
BPSL2481 ref|YP_109076.1|gi|53720090| oligoribonuclease	BPSL2481	Cytoplasmic	9.97
BPSL2483 ref|YP_109078.1|gi|53720092| ribosome-associated GTPase	BPSL2483	Cytoplasmic	9.97
BPSL2486 ref|YP_109081.1|gi|53720095| hypothetical protein	BPSL2486	Cytoplasmic	9.97
BPSL2488 ref|YP_109083.1|gi|53720097| transposase	BPSL2488	Cytoplasmic	8.96
BPSL2489 ref|YP_109084.1|gi|53720098| 50S ribosomal protein L19	BPSL2489	Cytoplasmic	9.97
BPSL2490 ref|YP_109085.1|gi|53720099| tRNA (guanine-N(1)-)-methyltransferase	BPSL2490	Cytoplasmic	9.97
BPSL2491 ref|YP_109086.1|gi|53720100| 16S rRNA-processing protein RimM	BPSL2491	Cytoplasmic	9.26
BPSL2492 ref|YP_109087.1|gi|53720101| 30S ribosomal protein S16	BPSL2492	Cytoplasmic	9.26
BPSL2495 ref|YP_109090.1|gi|53720104| hypothetical protein	BPSL2495	Cytoplasmic	8.96
BPSL2496 ref|YP_109091.1|gi|53720105| leucine-responsive regulatory protein	BPSL2496	Cytoplasmic	9.97
BPSL2498 ref|YP_109093.1|gi|53720107| acyl-CoA dehydrogenase	BPSL2498	Cytoplasmic	9.97
BPSL2500 ref|YP_109095.1|gi|53720109| electron transfer flavoprotein subunit beta	BPSL2500	Cytoplasmic	8.96
BPSL2504 ref|YP_109099.1|gi|53720113| hydrolase	BPSL2504	Cytoplasmic	9.26
BPSL2505 ref|YP_109100.1|gi|53720114| histone deacetylase-family protein	BPSL2505	Cytoplasmic	9.97
BPSL2507 ref|YP_109102.1|gi|53720116| cysteine synthase B	BPSL2507	Cytoplasmic	9.97
BPSL2509 ref|YP_109105.1|gi|53720119| ADP-glycero-mannoheptose epimerase	BPSL2509	Cytoplasmic	9.97
BPSL2510 ref|YP_109106.1|gi|53720120| ADP-heptose synthase	BPSL2510	Cytoplasmic	9.97
BPSL2512 ref|YP_109108.1|gi|53720122| tetratricopeptide repeat protein	BPSL2512	Cytoplasmic	8.96
BPSL2514 ref|YP_109110.1|gi|53720124| integration host factor subunit beta	BPSL2514	Cytoplasmic	9.97
BPSL2515 ref|YP_109111.1|gi|53720125| 30S ribosomal protein S1	BPSL2515	Cytoplasmic	9.97
BPSL2516 ref|YP_109112.1|gi|53720126| cytidylate kinase	BPSL2516	Cytoplasmic	9.26
BPSL2517 ref|YP_109113.2|gi|161723198| bifunctional prephenate dehydrogenase/3-phosphoshikimate 1-carboxyvinyltransferase	BPSL2517	Cytoplasmic	8.96
BPSL2518 ref|YP_109114.1|gi|53720128| chorismate mutase/prephenate dehydratase	BPSL2518	Cytoplasmic	9.97
BPSL2519 ref|YP_109115.1|gi|53720129| phosphoserine aminotransferase	BPSL2519	Cytoplasmic	9.26
BPSL2521 ref|YP_109117.1|gi|53720131| DNA gyrase subunit A	BPSL2521	Cytoplasmic	9.97
BPSL2523 ref|YP_109119.1|gi|53720133| 3-demethylubiquinone-9 3-methyltransferase	BPSL2523	Cytoplasmic	9.97
BPSL2524 ref|YP_109120.1|gi|53720134| phosphatase	BPSL2524	Cytoplasmic	9.26
BPSL2527 ref|YP_109123.1|gi|53720137| regulatory protein	BPSL2527	Cytoplasmic	8.96
BPSL2528 ref|YP_109124.1|gi|53720138| NAD-dependent formate dehydrogenase subunit gamma	BPSL2528	Cytoplasmic	9.12
BPSL2530 ref|YP_109126.1|gi|53720140| NAD-dependent formate dehydrogenase subunit alpha	BPSL2530	Cytoplasmic	9.97
BPSL2532 ref|YP_109128.1|gi|53720142| oxygenase	BPSL2532	Cytoplasmic	8.96
BPSL2536 ref|YP_109132.1|gi|53720146| amidase	BPSL2536	Cytoplasmic	9.26
BPSL2538 ref|YP_109134.1|gi|53720148| hypothetical protein	BPSL2538	Cytoplasmic	8.96
BPSL2539 ref|YP_109135.1|gi|53720149| adenosine deaminase	BPSL2539	Cytoplasmic	9.97
BPSL2541 ref|YP_109137.1|gi|53720151| guanine deaminase	BPSL2541	Cytoplasmic	9.97
BPSL2545 ref|YP_109141.1|gi|53720155| 5-methyltetrahydropteroyltriglutamate-- homocysteine S-methyltransferase	BPSL2545	Cytoplasmic	8.96
BPSL2546 ref|YP_109142.1|gi|53720156| transcriptional activator protein	BPSL2546	Cytoplasmic	9.97
BPSL2556 ref|YP_109153.1|gi|53720167| DNA polymerase/helicase	BPSL2556	Cytoplasmic	9.97
BPSL2557 ref|YP_109154.1|gi|53720168| cold shock-like protein	BPSL2557	Cytoplasmic	9.26
BPSL2560 ref|YP_109157.1|gi|53720171| transcription elongation factor GreB	BPSL2560	Cytoplasmic	9.97
BPSL2561 ref|YP_109158.1|gi|53720172| guanosine-3',5'-bis(diphosphate) 3'-pyrophosphohydrolase	BPSL2561	Cytoplasmic	8.96
BPSL2563 ref|YP_109160.1|gi|53720174| guanylate kinase	BPSL2563	Cytoplasmic	9.97
BPSL2564 ref|YP_109161.1|gi|53720175| hypothetical protein	BPSL2564	Cytoplasmic	9.97
BPSL2565 ref|YP_109162.1|gi|53720176| ribonuclease PH	BPSL2565	Cytoplasmic	9.97
BPSL2566 ref|YP_109163.1|gi|53720177| deoxyribonucleotide triphosphate pyrophosphatase	BPSL2566	Cytoplasmic	9.26
BPSL2567 ref|YP_109164.1|gi|53720178| coproporphyrinogen III oxidase	BPSL2567	Cytoplasmic	9.26
BPSL2570 ref|YP_109167.1|gi|53720181| hypothetical protein	BPSL2570	Cytoplasmic	8.96
BPSL2572 ref|YP_109169.1|gi|53720183| hypothetical protein	BPSL2572	Cytoplasmic	8.96
BPSL2573 ref|YP_109170.1|gi|53720184| hypothetical protein	BPSL2573	Cytoplasmic	8.96
BPSL2574 ref|YP_109171.1|gi|53720185| hypothetical protein	BPSL2574	Cytoplasmic	8.96
BPSL2575 ref|YP_109172.1|gi|53720186| hypothetical protein	BPSL2575	Cytoplasmic	8.96
BPSL2579 ref|YP_109176.1|gi|53720190| hypothetical protein	BPSL2579	Cytoplasmic	8.96
BPSL2583 ref|YP_109180.1|gi|53720194| hypothetical protein	BPSL2583	Cytoplasmic	8.96
BPSL2586 ref|YP_109183.1|gi|53720197| phage integrase	BPSL2586	Cytoplasmic	8.96
BPSL2592 ref|YP_109188.1|gi|53720202| lipopolysaccharide heptosyltransferase-1	BPSL2592	Cytoplasmic	9.97
BPSL2595 ref|YP_109191.1|gi|53720205| cell division topological specificity factor MinE	BPSL2595	Cytoplasmic	9.26
BPSL2596 ref|YP_109192.1|gi|53720206| septum site-determining protein	BPSL2596	Cytoplasmic	9.12
BPSL2597 ref|YP_109193.1|gi|53720207| septum formation inhibitor	BPSL2597	Cytoplasmic	9.97
BPSL2600 ref|YP_109196.1|gi|53720210| seryl-tRNA synthetase	BPSL2600	Cytoplasmic	10
BPSL2602 ref|YP_109198.1|gi|53720212| recombination factor protein RarA	BPSL2602	Cytoplasmic	9.26
BPSL2606 ref|YP_109202.1|gi|53720216| hypothetical protein	BPSL2606	Cytoplasmic	9.97
BPSL2612 ref|YP_109208.1|gi|53720222| glucose-6-phosphate 1-dehydrogenase	BPSL2612	Cytoplasmic	9.97
BPSL2614 ref|YP_109210.1|gi|53720224| bifunctional glucokinase/RpiR family transcriptional regulator	BPSL2614	Cytoplasmic	9.97
BPSL2618 ref|YP_109214.1|gi|53720228| D-cysteine desulfhydrase	BPSL2618	Cytoplasmic	9.97
BPSL2623 ref|YP_109219.1|gi|53720233| glutamate-1-semialdehyde aminotransferase	BPSL2623	Cytoplasmic	9.26
BPSL2624 ref|YP_109220.1|gi|53720234| multifunctional riboflavin biosynthetic protein [deaminase, reductase	BPSL2624	Cytoplasmic	9.97
BPSL2625 ref|YP_109221.1|gi|53720235| riboflavin synthase subunit alpha	BPSL2625	Cytoplasmic	9.97
BPSL2626 ref|YP_109222.1|gi|53720236| bifunctional 3,4-dihydroxy-2-butanone 4-phosphate synthase/GTP cyclohydrolase II-like protein	BPSL2626	Cytoplasmic	9.97
BPSL2627 ref|YP_109223.1|gi|53720237| 6,7-dimethyl-8-ribityllumazine synthase	BPSL2627	Cytoplasmic	9.97
BPSL2631 ref|YP_109227.1|gi|53720241| 3-octaprenyl-4-hydroxybenzoate carboxy-lyase	BPSL2631	Cytoplasmic	9.97
BPSL2633 ref|YP_109229.1|gi|53720243| serine/threonine dehydratase	BPSL2633	Cytoplasmic	9.97
BPSL2637 ref|YP_109233.1|gi|53720247| hypothetical protein	BPSL2637	Cytoplasmic	8.96
BPSL2640 ref|YP_109236.1|gi|53720250| hypothetical protein	BPSL2640	Cytoplasmic	8.96
BPSL2641 ref|YP_109237.1|gi|53720251| Sir2 family protein	BPSL2641	Cytoplasmic	9.97
BPSL2646 ref|YP_109242.1|gi|53720256| coproporphyrinogen III oxidase	BPSL2646	Cytoplasmic	9.97
BPSL2648 ref|YP_109244.1|gi|53720258| protein-L-isoaspartate O-methyltransferase	BPSL2648	Cytoplasmic	9.97
BPSL2650 ref|YP_109246.1|gi|53720260| omega amino acid--pyruvate transaminase	BPSL2650	Cytoplasmic	9.97
BPSL2656 ref|YP_109252.1|gi|53720266| UreD-family accessory protein	BPSL2656	Cytoplasmic	9.26
BPSL2657 ref|YP_109253.1|gi|53720267| urease subunit gamma	BPSL2657	Cytoplasmic	9.26
BPSL2658 ref|YP_109254.1|gi|53720268| urease subunit beta	BPSL2658	Cytoplasmic	9.26
BPSL2659 ref|YP_109255.1|gi|53720269| urease subunit alpha	BPSL2659	Cytoplasmic	9.97
BPSL2660 ref|YP_109256.1|gi|53720270| urease accessory protein UreE	BPSL2660	Cytoplasmic	9.97
BPSL2662 ref|YP_109258.1|gi|53720272| urease accessory protein	BPSL2662	Cytoplasmic	9.97
BPSL2664 ref|YP_109260.1|gi|53720274| hypothetical protein	BPSL2664	Cytoplasmic	8.96
BPSL2665 ref|YP_109261.1|gi|53720275| lipopolysaccharide heptosyltransferase-1	BPSL2665	Cytoplasmic	9.26
BPSL2666 ref|YP_109262.1|gi|53720276| phosphoglucomutase	BPSL2666	Cytoplasmic	9.97
BPSL2669 ref|YP_109265.1|gi|53720279| glycosyl transferase	BPSL2669	Cytoplasmic	9.97
BPSL2670 ref|YP_109266.1|gi|53720280| UDP-glucose 4-epimerase	BPSL2670	Cytoplasmic	8.96
BPSL2674 ref|YP_109270.1|gi|53720284| epimerase/dehydratase	BPSL2674	Cytoplasmic	9.97
BPSL2677 ref|YP_109273.1|gi|53720287| O-antigen methyl transferase	BPSL2677	Cytoplasmic	8.96
BPSL2679 ref|YP_109275.1|gi|53720289| epimerase/dehydratase	BPSL2679	Cytoplasmic	9.97
BPSL2683 ref|YP_109279.1|gi|53720293| dTDP-4-dehydrorhamnose reductase	BPSL2683	Cytoplasmic	9.26
BPSL2684 ref|YP_109280.1|gi|53720294| dTDP-6-deoxy-D-glucose-3,5 epimerase	BPSL2684	Cytoplasmic	8.96
BPSL2685 ref|YP_109281.1|gi|53720295| glucose-1-phosphate thymidylyltransferase	BPSL2685	Cytoplasmic	9.26
BPSL2686 ref|YP_109282.1|gi|53720296| dTDP-glucose 4,6-dehydratase	BPSL2686	Cytoplasmic	9.97
BPSL2687 ref|YP_109283.1|gi|53720297| diadenosine tetraphosphatase	BPSL2687	Cytoplasmic	9.97
BPSL2689 ref|YP_109285.1|gi|53720299| dihydroorotase	BPSL2689	Cytoplasmic	9.97
BPSL2690 ref|YP_109286.1|gi|53720300| aspartate carbamoyltransferase	BPSL2690	Cytoplasmic	9.97
BPSL2691 ref|YP_109287.1|gi|53720301| bifunctional pyrimidine regulatory protein PyrR uracil phosphoribosyltransferase	BPSL2691	Cytoplasmic	9.97
BPSL2692 ref|YP_109288.1|gi|53720302| Holliday junction resolvase-like protein	BPSL2692	Cytoplasmic	9.26
BPSL2695 ref|YP_109291.1|gi|53720305| rubredoxin	BPSL2695	Cytoplasmic	9.26
BPSL2696 ref|YP_109292.1|gi|53720306| kinase	BPSL2696	Cytoplasmic	8.96
BPSL2697 ref|YP_109293.1|gi|53720307| molecular chaperone GroEL	BPSL2697	Cytoplasmic	9.97
BPSL2698 ref|YP_109294.1|gi|53720308| co-chaperonin GroES	BPSL2698	Cytoplasmic	9.26
BPSL2701 ref|YP_109297.1|gi|53720311| alcohol dehydrogenase	BPSL2701	Cytoplasmic	9.97
BPSL2702 ref|YP_109298.1|gi|53720312| hypothetical protein	BPSL2702	Cytoplasmic	8.96
BPSL2709 ref|YP_109305.1|gi|53720319| DNA-binding protein	BPSL2709	Cytoplasmic	9.26
BPSL2720 ref|YP_109316.1|gi|53720330| LysR family transcriptional regulator	BPSL2720	Cytoplasmic	9.26
BPSL2727 ref|YP_109323.1|gi|53720337| xanthine dehydrogenase large subunit	BPSL2727	Cytoplasmic	8.96
BPSL2728 ref|YP_109324.1|gi|53720338| xanthine dehydrogenase	BPSL2728	Cytoplasmic	9.97
BPSL2731 ref|YP_109327.1|gi|53720341| AraC family transcriptional regulator	BPSL2731	Cytoplasmic	9.97
BPSL2733 ref|YP_109329.1|gi|53720343| LysR family transcriptional regulator	BPSL2733	Cytoplasmic	9.97
BPSL2734 ref|YP_109330.1|gi|53720344| D-lactate dehydrogenase	BPSL2734	Cytoplasmic	9.26
BPSL2738 ref|YP_109334.1|gi|53720348| hydrolase	BPSL2738	Cytoplasmic	9.26
BPSL2742 ref|YP_109338.1|gi|53720352| FAD-dependent oxidoreductase	BPSL2742	Cytoplasmic	8.96
BPSL2743 ref|YP_109339.1|gi|53720353| oxidoreductase	BPSL2743	Cytoplasmic	8.96
BPSL2744 ref|YP_109340.1|gi|53720354| hypothetical protein	BPSL2744	Cytoplasmic	8.96
BPSL2746 ref|YP_109342.1|gi|53720356| IclR family transcriptional regulator	BPSL2746	Cytoplasmic	9.26
BPSL2747 ref|YP_109343.1|gi|53720357| glutaryl-CoA dehydrogenase	BPSL2747	Cytoplasmic	9.97
BPSL2748 ref|YP_109344.1|gi|53720358| oxidoreductase	BPSL2748	Cytoplasmic	9.97
BPSL2757 ref|YP_109353.1|gi|53720367| transcriptional regulator NrdR	BPSL2757	Cytoplasmic	9.97
BPSL2758 ref|YP_109354.1|gi|53720368| serine hydroxymethyltransferase	BPSL2758	Cytoplasmic	9.97
BPSL2759 ref|YP_109355.1|gi|53720369| short-chain dehydrogenase	BPSL2759	Cytoplasmic	9.26
BPSL2760 ref|YP_109356.1|gi|53720370| thioesterase	BPSL2760	Cytoplasmic	9.26
BPSL2769 ref|YP_109364.1|gi|53720378| UTP-glucose-1-phosphate uridylyltransferase	BPSL2769	Cytoplasmic	9.97
BPSL2771 ref|YP_109366.1|gi|53720380| haloacid dehalogenase-like hydrolase	BPSL2771	Cytoplasmic	9.97
BPSL2772 ref|YP_109367.1|gi|53720381| 2-dehydro-3-deoxyphosphooctonate aldolase	BPSL2772	Cytoplasmic	9.97
BPSL2773 ref|YP_109368.1|gi|53720382| glycosyltransferase	BPSL2773	Cytoplasmic	8.96
BPSL2774 ref|YP_109369.1|gi|53720383| hypothetical protein	BPSL2774	Cytoplasmic	8.96
BPSL2775 ref|YP_109370.1|gi|53720384| colanic acid biosynthesis acetyltransferase	BPSL2775	Cytoplasmic	9.97
BPSL2776 ref|YP_109371.1|gi|53720385| hypothetical protein	BPSL2776	Cytoplasmic	8.96
BPSL2782 ref|YP_109377.1|gi|53720391| AraC family transcriptional regulator	BPSL2782	Cytoplasmic	9.26
BPSL2787 ref|YP_109382.1|gi|53720396| acyl-CoA transferase	BPSL2787	Cytoplasmic	9.97
BPSL2788 ref|YP_109383.1|gi|53720397| UDP-3-O-[3-hydroxymyristoyl] N-acetylglucosamine deacetylase	BPSL2788	Cytoplasmic	9.97
BPSL2791 ref|YP_109386.1|gi|53720400| capsular polysaccharide biosynthesis dehydrogenase/reductase	BPSL2791	Cytoplasmic	9.26
BPSL2793 ref|YP_109388.1|gi|53720402| D-glycero-d-manno-heptose 1,7-bisphosphate phosphatase	BPSL2793	Cytoplasmic	9.26
BPSL2794 ref|YP_109389.1|gi|53720403| D-glycero-d-manno-heptose 1-phosphate guanosyltransferase	BPSL2794	Cytoplasmic	9.97
BPSL2795 ref|YP_109390.1|gi|53720404| phosphoheptose isomerase	BPSL2795	Cytoplasmic	9.97
BPSL2796 ref|YP_109391.1|gi|53720405| sugar kinase	BPSL2796	Cytoplasmic	8.96
BPSL2797 ref|YP_109392.1|gi|53720406| GDP sugar epimerase/dehydratase	BPSL2797	Cytoplasmic	9.97
BPSL2799 ref|YP_109394.1|gi|53720408| capsular polysaccharide biosynthesis protein	BPSL2799	Cytoplasmic	8.96
BPSL2800 ref|YP_109395.1|gi|53720409| glycosyl transferase	BPSL2800	Cytoplasmic	8.96
BPSL2801 ref|YP_109396.1|gi|53720410| capsular polysaccharide biosynthesis protein	BPSL2801	Cytoplasmic	8.96
BPSL2802 ref|YP_109397.1|gi|53720411| capsule polysaccharide biosynthesis protein	BPSL2802	Cytoplasmic	8.96
BPSL2803 ref|YP_109398.1|gi|53720412| glycosyltransferase	BPSL2803	Cytoplasmic	8.96
BPSL2804 ref|YP_109399.1|gi|53720413| ATP-binding ABC transporter capsular polysaccharide export protein	BPSL2804	Cytoplasmic	9.12
BPSL2808 ref|YP_109403.1|gi|53720417| capsular polysaccharide glycosyltransferase biosynthesis protein	BPSL2808	Cytoplasmic	9.97
BPSL2809 ref|YP_109404.1|gi|53720418| capsule polysaccharide export protein	BPSL2809	Cytoplasmic	9.97
BPSL2810 ref|YP_109405.1|gi|53720419| GDP-mannose pyrophosphorylase	BPSL2810	Cytoplasmic	8.96
BPSL2814 ref|YP_109409.1|gi|53720423| DNA mismatch repair protein	BPSL2814	Cytoplasmic	9.97
BPSL2816 ref|YP_109411.1|gi|53720425| hypothetical protein	BPSL2816	Cytoplasmic	8.96
BPSL2817 ref|YP_109412.1|gi|53720426| transposase	BPSL2817	Cytoplasmic	8.96
BPSL2818 ref|YP_109413.1|gi|53720427| phosphoribosylaminoimidazole synthetase	BPSL2818	Cytoplasmic	9.97
BPSL2819 ref|YP_109414.1|gi|53720428| DnaA regulatory inactivator Hda	BPSL2819	Cytoplasmic	8.96
BPSL2820 ref|YP_109415.1|gi|53720429| hypothetical protein	BPSL2820	Cytoplasmic	9.97
BPSL2821 ref|YP_109416.1|gi|53720430| polynucleotide adenylyltransferase	BPSL2821	Cytoplasmic	9.97
BPSL2822 ref|YP_109417.1|gi|53720431| 2-amino-4-hydroxy-6- hydroxymethyldihydropteridine pyrophosphokinase	BPSL2822	Cytoplasmic	9.97
BPSL2824 ref|YP_109419.1|gi|53720433| 3-methyl-2-oxobutanoate hydroxymethyltransferase	BPSL2824	Cytoplasmic	8.96
BPSL2825 ref|YP_109420.1|gi|53720434| hypothetical protein	BPSL2825	Cytoplasmic	9.97
BPSL2826 ref|YP_109421.1|gi|53720435| molecular chaperone DnaJ	BPSL2826	Cytoplasmic	9.97
BPSL2827 ref|YP_109422.1|gi|53720436| molecular chaperone DnaK	BPSL2827	Cytoplasmic	9.97
BPSL2829 ref|YP_109423.1|gi|53720437| heat shock protein GrpE	BPSL2829	Cytoplasmic	9.97
BPSL2830 ref|YP_109424.1|gi|53720438| heat shock protein 15	BPSL2830	Cytoplasmic	9.97
BPSL2831 ref|YP_109425.1|gi|53720439| ferrochelatase	BPSL2831	Cytoplasmic	9.97
BPSL2832 ref|YP_109426.1|gi|53720440| heat-inducible transcription repressor	BPSL2832	Cytoplasmic	8.96
BPSL2833 ref|YP_109427.1|gi|53720441| NAD(+)/NADH kinase	BPSL2833	Cytoplasmic	9.26
BPSL2834 ref|YP_109428.1|gi|53720442| RecN DNA repair protein	BPSL2834	Cytoplasmic	9.97
BPSL2835 ref|YP_109429.1|gi|53720443| bifunctional glutamine-synthetase adenylyltransferase/deadenyltransferase	BPSL2835	Cytoplasmic	8.96
BPSL2837 ref|YP_109431.1|gi|53720445| carbon-nitrogen hydrolase	BPSL2837	Cytoplasmic	9.97
BPSL2838 ref|YP_109432.1|gi|53720446| DNA gyrase control protein	BPSL2838	Cytoplasmic	9.26
BPSL2839 ref|YP_109433.1|gi|53720447| phospho-2-dehydro-3-deoxyheptonate aldolase	BPSL2839	Cytoplasmic	9.97
BPSL2840 ref|YP_109434.1|gi|53720448| flavohemoprotein	BPSL2840	Cytoplasmic	9.97
BPSL2841 ref|YP_109435.1|gi|53720449| hypothetical protein	BPSL2841	Cytoplasmic	9.97
BPSL2842 ref|YP_109436.1|gi|53720450| FAD-binding oxidase	BPSL2842	Cytoplasmic	9.97
BPSL2843 ref|YP_109437.1|gi|53720451| glycolate oxidase subunit GlcD	BPSL2843	Cytoplasmic	9.97
BPSL2844 ref|YP_109438.1|gi|53720452| glycolate oxidase FAD binding subunit	BPSL2844	Cytoplasmic	9.26
BPSL2846 ref|YP_109440.1|gi|53720454| hypothetical protein	BPSL2846	Cytoplasmic	9.26
BPSL2847 ref|YP_109441.1|gi|53720455| pyrroline-5-carboxylate reductase	BPSL2847	Cytoplasmic	9.26
BPSL2851 ref|YP_109445.1|gi|53720459| phosphonate metabolism PhnM protein	BPSL2851	Cytoplasmic	9.97
BPSL2854 ref|YP_109448.1|gi|53720462| phosphonate metabolism PhnJ protein	BPSL2854	Cytoplasmic	8.96
BPSL2855 ref|YP_109449.1|gi|53720463| phosphonate metabolism PhnI protein	BPSL2855	Cytoplasmic	8.96
BPSL2858 ref|YP_109452.1|gi|53720466| GntR family transcriptional regulator	BPSL2858	Cytoplasmic	9.97
BPSL2860 ref|YP_109454.1|gi|53720468| ATP-binding protein PhnN	BPSL2860	Cytoplasmic	9.26
BPSL2862 ref|YP_109456.1|gi|53720470| hypothetical protein	BPSL2862	Cytoplasmic	9.26
BPSL2863 ref|YP_109457.1|gi|53720471| ferritin	BPSL2863	Cytoplasmic	9.26
BPSL2865 ref|YP_109459.1|gi|53720473| catalase-peroxidase	BPSL2865	Cytoplasmic	9.26
BPSL2866 ref|YP_109460.1|gi|53720474| oxidative stress regulatory protein	BPSL2866	Cytoplasmic	9.97
BPSL2868 ref|YP_109462.1|gi|53720476| S-adenosylmethionine:tRNA ribosyltransferase-isomerase	BPSL2868	Cytoplasmic	9.97
BPSL2869 ref|YP_109463.1|gi|53720477| queuine tRNA-ribosyltransferase	BPSL2869	Cytoplasmic	9.97
BPSL2882 ref|YP_109476.1|gi|53720490| RNA-methylase	BPSL2882	Cytoplasmic	9.97
BPSL2888 ref|YP_109482.1|gi|53720496| hydrolase	BPSL2888	Cytoplasmic	9.97
BPSL2889 ref|YP_109483.1|gi|53720497| tRNA-specific 2-thiouridylase MnmA	BPSL2889	Cytoplasmic	9.97
BPSL2891 ref|YP_109485.1|gi|53720499| glutathione S-transferase-like protein	BPSL2891	Cytoplasmic	9.97
BPSL2892 ref|YP_109486.1|gi|53720500| aminopeptidase	BPSL2892	Cytoplasmic	9.97
BPSL2894 ref|YP_109488.1|gi|53720502| nitrogen regulation-like protein	BPSL2894	Cytoplasmic	9.97
BPSL2895 ref|YP_109489.1|gi|53720503| DNA-binding protein Fis	BPSL2895	Cytoplasmic	9.26
BPSL2896 ref|YP_109490.1|gi|53720504| bifunctional phosphoribosylaminoimidazolecarboxamide formyltransferase/IMP cyclohydrolase	BPSL2896	Cytoplasmic	9.97
BPSL2897 ref|YP_109491.1|gi|53720505| Holliday junction resolvase	BPSL2897	Cytoplasmic	9.26
BPSL2898 ref|YP_109492.1|gi|53720506| Holliday junction DNA helicase RuvA	BPSL2898	Cytoplasmic	9.97
BPSL2899 ref|YP_109493.1|gi|53720507| Holliday junction DNA helicase RuvB	BPSL2899	Cytoplasmic	9.97
BPSL2902 ref|YP_109496.1|gi|53720510| phosphoglycerate mutase	BPSL2902	Cytoplasmic	9.97
BPSL2904 ref|YP_109498.1|gi|53720512| tyrosyl-tRNA synthetase	BPSL2904	Cytoplasmic	9.97
BPSL2905 ref|YP_109499.1|gi|53720513| anhydro-N-acetylmuramic acid kinase	BPSL2905	Cytoplasmic	8.96
BPSL2906 ref|YP_109500.1|gi|53720514| glutathione S-transferase-like protein	BPSL2906	Cytoplasmic	9.26
BPSL2907 ref|YP_109501.1|gi|53720515| glutathione S-transferase like protein	BPSL2907	Cytoplasmic	9.97
BPSL2909 ref|YP_109503.1|gi|53720517| iron-sulfur cluster insertion protein ErpA	BPSL2909	Cytoplasmic	9.26
BPSL2910 ref|YP_109504.1|gi|53720518| 30S ribosomal protein S9	BPSL2910	Cytoplasmic	9.26
BPSL2911 ref|YP_109505.1|gi|53720519| 50S ribosomal protein L13	BPSL2911	Cytoplasmic	9.97
BPSL2914 ref|YP_109508.1|gi|53720522| dihydroorotase	BPSL2914	Cytoplasmic	9.97
BPSL2915 ref|YP_109509.1|gi|53720523| hypothetical protein	BPSL2915	Cytoplasmic	9.97
BPSL2917 ref|YP_109511.1|gi|53720525| heat shock Hsp20-like protein	BPSL2917	Cytoplasmic	8.96
BPSL2918 ref|YP_109512.1|gi|53720526| heat shock Hsp20-like protein	BPSL2918	Cytoplasmic	8.96
BPSL2919 ref|YP_109513.1|gi|53720527| molecular chaperone GroES	BPSL2919	Cytoplasmic	9.97
BPSL2925 ref|YP_109519.1|gi|53720533| glutamate dehydrogenase	BPSL2925	Cytoplasmic	9.97
BPSL2926 ref|YP_109520.1|gi|53720534| LysR family transcriptional regulator	BPSL2926	Cytoplasmic	9.97
BPSL2928 ref|YP_109522.1|gi|53720536| adenylosuccinate lyase	BPSL2928	Cytoplasmic	9.97
BPSL2929 ref|YP_109523.1|gi|53720537| thermoresistant gluconokinase	BPSL2929	Cytoplasmic	8.96
BPSL2931 ref|YP_109525.1|gi|53720539| KHG/KDPG aldolase	BPSL2931	Cytoplasmic	9.97
BPSL2932 ref|YP_109526.1|gi|53720540| phosphogluconate dehydratase	BPSL2932	Cytoplasmic	9.97
BPSL2933 ref|YP_109527.1|gi|53720541| regulatory protein	BPSL2933	Cytoplasmic	9.97
BPSL2935 ref|YP_109529.2|gi|161723197| gamma-glutamyl phosphate reductase	BPSL2935	Cytoplasmic	9.97
BPSL2938 ref|YP_109532.1|gi|53720546| leucyl-tRNA synthetase	BPSL2938	Cytoplasmic	9.97
BPSL2941 ref|YP_109535.1|gi|53720549| dihydrodipicolinate reductase	BPSL2941	Cytoplasmic	9.26
BPSL2943 ref|YP_109537.1|gi|53720551| ferric uptake regulator	BPSL2943	Cytoplasmic	9.97
BPSL2945 ref|YP_109539.1|gi|53720553| allantoicase	BPSL2945	Cytoplasmic	9.26
BPSL2947 ref|YP_109541.1|gi|53720555| GntR family transcriptional regulator	BPSL2947	Cytoplasmic	9.97
BPSL2948 ref|YP_109542.1|gi|53720556| DNA-binding transcriptional regulator CynR	BPSL2948	Cytoplasmic	9.97
BPSL2949 ref|YP_109543.1|gi|53720557| carbonic anhydrase	BPSL2949	Cytoplasmic	9.97
BPSL2950 ref|YP_109544.1|gi|53720558| cyanate hydratase	BPSL2950	Cytoplasmic	9.97
BPSL2952 ref|YP_109546.1|gi|53720560| glyceraldehyde 3-phosphate dehydrogenase 1	BPSL2952	Cytoplasmic	9.97
BPSL2953 ref|YP_109547.1|gi|53720561| transketolase	BPSL2953	Cytoplasmic	9.97
BPSL2954 ref|YP_109548.1|gi|53720562| spermidine synthase	BPSL2954	Cytoplasmic	9.97
BPSL2959 ref|YP_109553.1|gi|53720567| malic enzyme	BPSL2959	Cytoplasmic	9.97
BPSL2960 ref|YP_109554.1|gi|53720568| thiamine monophosphate kinase	BPSL2960	Cytoplasmic	8.96
BPSL2963 ref|YP_109557.1|gi|53720571| orotidine 5'-phosphate decarboxylase	BPSL2963	Cytoplasmic	8.96
BPSL2965 ref|YP_109559.1|gi|53720573| dehydrogenase	BPSL2965	Cytoplasmic	9.97
BPSL2969 ref|YP_109563.1|gi|53720577| short chain dehydrogenase	BPSL2969	Cytoplasmic	9.97
BPSL2970 ref|YP_109564.1|gi|53720578| 2-dehydro-3-deoxy-6-phosphogalactonate aldolase	BPSL2970	Cytoplasmic	9.97
BPSL2972 ref|YP_109566.1|gi|53720580| IclR family transcriptional regulator	BPSL2972	Cytoplasmic	9.26
BPSL2976 ref|YP_109570.1|gi|53720584| shikimate 5-dehydrogenase	BPSL2976	Cytoplasmic	9.26
BPSL2977 ref|YP_109571.1|gi|53720585| exoribonuclease II	BPSL2977	Cytoplasmic	9.97
BPSL2978 ref|YP_109572.1|gi|53720586| hypothetical protein	BPSL2978	Cytoplasmic	8.96
BPSL2979 ref|YP_109573.1|gi|53720587| UDP-N-acetylmuramate:L-alanyl-gamma-D-glutamyl- me so-diaminopimelate ligase	BPSL2979	Cytoplasmic	9.26
BPSL2980 ref|YP_109574.1|gi|53720588| hypothetical protein	BPSL2980	Cytoplasmic	8.96
BPSL2982 ref|YP_109576.1|gi|53720590| 3-dehydroquinate dehydratase	BPSL2982	Cytoplasmic	9.26
BPSL2983 ref|YP_109577.1|gi|53720591| acetyl-CoA carboxylase biotin carboxyl carrier protein subunit	BPSL2983	Cytoplasmic	8.96
BPSL2984 ref|YP_109578.1|gi|53720592| acetyl-CoA carboxylase biotin carboxylase subunit	BPSL2984	Cytoplasmic	9.97
BPSL2985 ref|YP_109579.1|gi|53720593| ribosomal protein L11 methyltransferase	BPSL2985	Cytoplasmic	9.97
BPSL2988 ref|YP_109582.1|gi|53720596| sugar kinase	BPSL2988	Cytoplasmic	8.96
BPSL2991 ref|YP_109585.1|gi|53720599| ribonucleotide-diphosphate reductase subunit beta	BPSL2991	Cytoplasmic	9.97
BPSL2992 ref|YP_109586.1|gi|53720600| ribonucleotide-diphosphate reductase subunit alpha	BPSL2992	Cytoplasmic	9.97
BPSL2993 ref|YP_109587.1|gi|53720601| N-acetyl-anhydromuranmyl-L-alanine amidase	BPSL2993	Cytoplasmic	9.26
BPSL2996 ref|YP_109591.1|gi|53720605| hypoxanthine-guanine phosphoribosyltransferase	BPSL2996	Cytoplasmic	9.97
BPSL2998 ref|YP_109593.1|gi|53720607| prolyl-tRNA synthetase	BPSL2998	Cytoplasmic	10
BPSL2999 ref|YP_109594.1|gi|53720608| dinucleoside polyphosphate hydrolase	BPSL2999	Cytoplasmic	9.97
BPSL3001 ref|YP_109596.1|gi|53720610| transposase	BPSL3001	Cytoplasmic	8.96
BPSL3002 ref|YP_109597.1|gi|53720611| gamma-glutamyl kinase	BPSL3002	Cytoplasmic	9.97
BPSL3003 ref|YP_109598.1|gi|53720612| GTPase ObgE	BPSL3003	Cytoplasmic	8.96
BPSL3004 ref|YP_109599.1|gi|53720613| 50S ribosomal protein L27	BPSL3004	Cytoplasmic	9.26
BPSL3005 ref|YP_109600.1|gi|53720614| 50S ribosomal protein L21	BPSL3005	Cytoplasmic	9.26
BPSL3006 ref|YP_109601.1|gi|53720615| octaprenyl-diphosphate synthase	BPSL3006	Cytoplasmic	9.97
BPSL3008 ref|YP_109603.1|gi|53720617| type IV pilus assembly protein	BPSL3008	Cytoplasmic	9.97
BPSL3011 ref|YP_109606.1|gi|53720620| dephospho-CoA kinase	BPSL3011	Cytoplasmic	9.97
BPSL3012 ref|YP_109607.1|gi|53720621| hypothetical protein	BPSL3012	Cytoplasmic	8.96
BPSL3014 ref|YP_109610.1|gi|53720624| hypothetical protein	BPSL3014	Cytoplasmic	9.97
BPSL3015 ref|YP_109611.1|gi|53720625| bifunctional ornithine acetyltransferase/N-acetylglutamate synthase	BPSL3015	Cytoplasmic	9.97
BPSL3016 ref|YP_109612.1|gi|53720626| preprotein translocase subunit SecA	BPSL3016	Cytoplasmic	9.12
BPSL3018 ref|YP_109614.1|gi|53720628| UDP-3-O-[3-hydroxymyristoyl] N-acetylglucosamine deacetylase	BPSL3018	Cytoplasmic	9.97
BPSL3020 ref|YP_109616.1|gi|53720630| cell division protein FtsZ	BPSL3020	Cytoplasmic	9.12
BPSL3021 ref|YP_109617.1|gi|53720631| cell division protein FtsA	BPSL3021	Cytoplasmic	9.97
BPSL3023 ref|YP_109619.1|gi|53720633| D-alanine--D-alanine ligase	BPSL3023	Cytoplasmic	9.97
BPSL3024 ref|YP_109620.1|gi|53720634| UDP-N-acetylmuramate--L-alanine ligase	BPSL3024	Cytoplasmic	9.97
BPSL3027 ref|YP_109623.2|gi|161723195| UDP-N-acetylmuramoyl-L-alanyl-D-glutamate synthetase	BPSL3027	Cytoplasmic	9.97
BPSL3029 ref|YP_109625.1|gi|53720639| UDP-N-acetylmuramoylalanyl-D-glutamyl-2, 6-diamino pimelate--D-alanyl-D-alanyl ligase	BPSL3029	Cytoplasmic	9.26
BPSL3030 ref|YP_109626.1|gi|53720640| UDP-N-acetylmuramoylalanyl-D-glutamate--2, 6-diaminopimelate ligase	BPSL3030	Cytoplasmic	8.96
BPSL3033 ref|YP_109629.1|gi|53720643| S-adenosyl-methyltransferase MraW	BPSL3033	Cytoplasmic	9.97
BPSL3034 ref|YP_109630.1|gi|53720644| cell division protein MraZ	BPSL3034	Cytoplasmic	9.26
BPSL3035 ref|YP_109631.1|gi|53720645| hypothetical protein	BPSL3035	Cytoplasmic	8.96
BPSL3037 ref|YP_109633.1|gi|53720647| Long-chain-fatty-acid--CoA ligase	BPSL3037	Cytoplasmic	9.97
BPSL3038 ref|YP_109634.1|gi|53720648| molybdopterin-containing oxidoreductase	BPSL3038	Cytoplasmic	9.12
BPSL3040 ref|YP_109635.1|gi|53720649| enoyl-CoA hydratase	BPSL3040	Cytoplasmic	9.97
BPSL3041 ref|YP_109636.1|gi|53720650| PacL	BPSL3041	Cytoplasmic	9.97
BPSL3042 ref|YP_109637.1|gi|53720651| beta-ketoadipyl CoA thiolase	BPSL3042	Cytoplasmic	9.97
BPSL3043 ref|YP_109638.1|gi|53720652| enoyl-CoA hydratase	BPSL3043	Cytoplasmic	9.97
BPSL3045 ref|YP_109640.1|gi|53720654| phenylacetate-coenzyme A ligase	BPSL3045	Cytoplasmic	8.96
BPSL3048 ref|YP_109643.1|gi|53720657| ribulose-phosphate 3-epimerase	BPSL3048	Cytoplasmic	9.97
BPSL3049 ref|YP_109644.1|gi|53720658| hydrolase	BPSL3049	Cytoplasmic	9.26
BPSL3050 ref|YP_109645.1|gi|53720659| anthranilate synthase component I	BPSL3050	Cytoplasmic	9.97
BPSL3051 ref|YP_109646.1|gi|53720660| anthranilate synthase component II	BPSL3051	Cytoplasmic	9.97
BPSL3052 ref|YP_109647.1|gi|53720661| anthranilate phosphoribosyltransferase	BPSL3052	Cytoplasmic	9.97
BPSL3053 ref|YP_109648.1|gi|53720662| indole-3-glycerol phosphate synthase	BPSL3053	Cytoplasmic	9.97
BPSL3054 ref|YP_109649.1|gi|53720663| hypothetical protein	BPSL3054	Cytoplasmic	8.96
BPSL3055 ref|YP_109650.1|gi|53720664| uracil-DNA glycosylase	BPSL3055	Cytoplasmic	9.97
BPSL3056 ref|YP_109651.1|gi|53720665| ACP phosphodieterase	BPSL3056	Cytoplasmic	9.26
BPSL3057 ref|YP_109652.1|gi|53720666| peptidase	BPSL3057	Cytoplasmic	8.96
BPSL3059 ref|YP_109654.1|gi|53720668| ubiquinone biosynthesis hydroxylase	BPSL3059	Cytoplasmic	9.26
BPSL3061 ref|YP_109656.1|gi|53720670| hypothetical protein	BPSL3061	Cytoplasmic	8.96
BPSL3062 ref|YP_109657.1|gi|53720671| GTP-dependent nucleic acid-binding protein EngD	BPSL3062	Cytoplasmic	8.96
BPSL3067 ref|YP_109662.1|gi|53720676| ABC transporter ATP-binding protein	BPSL3067	Cytoplasmic	9.97
BPSL3068 ref|YP_109663.1|gi|53720677| hydrolase	BPSL3068	Cytoplasmic	8.96
BPSL3072 ref|YP_109667.2|gi|161723194| glutamyl-tRNA reductase	BPSL3072	Cytoplasmic	9.97
BPSL3073 ref|YP_109668.1|gi|53720682| peptide chain release factor 1	BPSL3073	Cytoplasmic	10
BPSL3074 ref|YP_109669.1|gi|53720683| protein methyltransferase HemK	BPSL3074	Cytoplasmic	9.97
BPSL3079 ref|YP_109674.1|gi|53720688| cold shock-like protein CspD	BPSL3079	Cytoplasmic	9.26
BPSL3080 ref|YP_109675.1|gi|53720689| chaperone protein	BPSL3080	Cytoplasmic	9.97
BPSL3083 ref|YP_109678.1|gi|53720692| TetR family transcriptional regulator	BPSL3083	Cytoplasmic	9.97
BPSL3084 ref|YP_109679.1|gi|53720693| hypothetical protein	BPSL3084	Cytoplasmic	8.96
BPSL3085 ref|YP_109680.1|gi|53720694| hypothetical protein	BPSL3085	Cytoplasmic	8.96
BPSL3086 ref|YP_109681.1|gi|53720695| hypothetical protein	BPSL3086	Cytoplasmic	8.96
BPSL3100 ref|YP_109695.1|gi|53720709| type VI secretion system protein TssA-1	BPSL3100	Cytoplasmic	9.97
BPSL3101 ref|YP_109696.1|gi|53720710| type VI secretion system protein TssH-1	BPSL3101	Cytoplasmic	9.97
BPSL3102 ref|YP_109697.1|gi|53720711| type VI secretion system protein TssG-1	BPSL3102	Cytoplasmic	8.96
BPSL3103 ref|YP_109698.1|gi|53720712| type VI secretion system protein TssF-1	BPSL3103	Cytoplasmic	8.96
BPSL3106 ref|YP_109701.1|gi|53720715| type VI secretion system protein TssC-1	BPSL3106	Cytoplasmic	9.26
BPSL3107 ref|YP_109702.1|gi|53720716| type VI secretion system protein TssB-1	BPSL3107	Cytoplasmic	9.97
BPSL3110 ref|YP_109705.1|gi|53720719| type VI secretion system protein TssK-1	BPSL3110	Cytoplasmic	9.97
BPSL3115 ref|YP_109708.1|gi|53720722| transcriptional regulator	BPSL3115	Cytoplasmic	8.96
BPSL3116 ref|YP_109709.1|gi|53720723| transposase	BPSL3116	Cytoplasmic	9.26
BPSL3117 ref|YP_109710.1|gi|53720724| hypothetical protein	BPSL3117	Cytoplasmic	9.97
BPSL3118 ref|YP_109711.1|gi|53720725| restriction modification system methylase	BPSL3118	Cytoplasmic	8.96
BPSL3119 ref|YP_109712.1|gi|53720726| ClpXP protease specificity-enhancing factor	BPSL3119	Cytoplasmic	8.96
BPSL3120 ref|YP_109713.1|gi|53720727| stringent starvation protein A	BPSL3120	Cytoplasmic	9.97
BPSL3124 ref|YP_109717.1|gi|53720731| hypothetical protein	BPSL3124	Cytoplasmic	9.97
BPSL3129 ref|YP_109722.1|gi|53720736| hypothetical protein	BPSL3129	Cytoplasmic	9.26
BPSL3131 ref|YP_109724.1|gi|53720738| phosphoribosyl-ATP pyrophosphatase	BPSL3131	Cytoplasmic	9.26
BPSL3132 ref|YP_109725.1|gi|53720739| phosphoribosyl-AMP cyclohydrolase	BPSL3132	Cytoplasmic	9.97
BPSL3133 ref|YP_109726.2|gi|161723193| imidazole glycerol phosphate synthase subunit HisF	BPSL3133	Cytoplasmic	9.97
BPSL3134 ref|YP_109727.1|gi|53720741| 1-(5-phosphoribosyl)-5-[(5- phosphoribosylamino)methylideneamino] imidazole-4-carboxamide isomerase	BPSL3134	Cytoplasmic	9.97
BPSL3135 ref|YP_109728.1|gi|53720742| imidazole glycerol phosphate synthase subunit HisH	BPSL3135	Cytoplasmic	9.26
BPSL3137 ref|YP_109730.1|gi|53720744| imidazoleglycerol-phosphate dehydratase	BPSL3137	Cytoplasmic	9.97
BPSL3138 ref|YP_109731.1|gi|53720745| histidinol-phosphate aminotransferase	BPSL3138	Cytoplasmic	9.97
BPSL3139 ref|YP_109732.1|gi|53720746| histidinol dehydrogenase	BPSL3139	Cytoplasmic	9.97
BPSL3140 ref|YP_109733.1|gi|53720747| ATP phosphoribosyltransferase	BPSL3140	Cytoplasmic	9.97
BPSL3141 ref|YP_109734.1|gi|53720748| UDP-N-acetylglucosamine 1-carboxyvinyltransferase	BPSL3141	Cytoplasmic	9.97
BPSL3151 ref|YP_109744.1|gi|53720758| thiamine-phosphate pyrophosphorylase	BPSL3151	Cytoplasmic	8.96
BPSL3152 ref|YP_109745.1|gi|53720759| thiazole synthase	BPSL3152	Cytoplasmic	9.97
BPSL3156 ref|YP_109749.1|gi|53720763| hypothetical protein	BPSL3156	Cytoplasmic	8.96
BPSL3158 ref|YP_109751.2|gi|161723192| glutamate synthase subunit beta	BPSL3158	Cytoplasmic	9.97
BPSL3162 ref|YP_109755.1|gi|53720769| cytoplasmic glycerophosphodiester phosphodiesterase	BPSL3162	Cytoplasmic	9.26
BPSL3167 ref|YP_109760.1|gi|53720774| deoxyguanosinetriphosphate triphosphohydrolase-like protein	BPSL3167	Cytoplasmic	8.96
BPSL3168 ref|YP_109761.1|gi|53720775| 3-dehydroquinate synthase	BPSL3168	Cytoplasmic	9.97
BPSL3169 ref|YP_109762.1|gi|53720776| shikimate kinase	BPSL3169	Cytoplasmic	9.97
BPSL3173 ref|YP_109766.1|gi|53720780| hypothetical protein	BPSL3173	Cytoplasmic	8.96
BPSL3176 ref|YP_109770.1|gi|53720784| diaminopimelate decarboxylase	BPSL3176	Cytoplasmic	9.97
BPSL3183 ref|YP_109777.1|gi|53720791| delta-aminolevulinic acid dehydratase	BPSL3183	Cytoplasmic	9.97
BPSL3186 ref|YP_109780.1|gi|53720794| 50S ribosomal protein L17	BPSL3186	Cytoplasmic	9.97
BPSL3187 ref|YP_109781.1|gi|53720795| DNA-directed RNA polymerase subunit alpha	BPSL3187	Cytoplasmic	9.97
BPSL3188 ref|YP_109782.1|gi|53720796| 30S ribosomal protein S4	BPSL3188	Cytoplasmic	9.97
BPSL3189 ref|YP_109783.1|gi|53720797| 30S ribosomal protein S11	BPSL3189	Cytoplasmic	9.26
BPSL3190 ref|YP_109784.1|gi|53720798| 30S ribosomal protein S13	BPSL3190	Cytoplasmic	9.97
BPSL3191 ref|YP_109785.1|gi|53720799| 50S ribosomal protein L36	BPSL3191	Cytoplasmic	9.26
BPSL3192 ref|YP_109786.1|gi|53720800| translation initiation factor IF-1	BPSL3192	Cytoplasmic	9.97
BPSL3194 ref|YP_109788.1|gi|53720802| 50S ribosomal protein L15	BPSL3194	Cytoplasmic	9.97
BPSL3195 ref|YP_109789.1|gi|53720803| 50S ribosomal protein L30	BPSL3195	Cytoplasmic	9.26
BPSL3196 ref|YP_109790.1|gi|53720804| 30S ribosomal protein S5	BPSL3196	Cytoplasmic	9.26
BPSL3197 ref|YP_109791.1|gi|53720805| 50S ribosomal protein L18	BPSL3197	Cytoplasmic	9.97
BPSL3198 ref|YP_109792.1|gi|53720806| 50S ribosomal protein L6	BPSL3198	Cytoplasmic	9.26
BPSL3199 ref|YP_109793.1|gi|53720807| 30S ribosomal protein S8	BPSL3199	Cytoplasmic	9.97
BPSL3200 ref|YP_109794.1|gi|53720808| 30S ribosomal protein S14	BPSL3200	Cytoplasmic	9.26
BPSL3201 ref|YP_109795.1|gi|53720809| 50S ribosomal protein L5	BPSL3201	Cytoplasmic	9.97
BPSL3202 ref|YP_109796.1|gi|53720810| 50S ribosomal protein L24	BPSL3202	Cytoplasmic	9.26
BPSL3203 ref|YP_109797.1|gi|53720811| 50S ribosomal protein L14	BPSL3203	Cytoplasmic	9.26
BPSL3204 ref|YP_109798.1|gi|53720812| 30S ribosomal protein S17	BPSL3204	Cytoplasmic	9.26
BPSL3205 ref|YP_109799.1|gi|53720813| 50S ribosomal protein L29	BPSL3205	Cytoplasmic	9.26
BPSL3206 ref|YP_109800.1|gi|53720814| 50S ribosomal protein L16	BPSL3206	Cytoplasmic	9.97
BPSL3207 ref|YP_109801.1|gi|53720815| 30S ribosomal protein S3	BPSL3207	Cytoplasmic	9.97
BPSL3208 ref|YP_109802.1|gi|53720816| 50S ribosomal protein L22	BPSL3208	Cytoplasmic	9.26
BPSL3209 ref|YP_109803.1|gi|53720817| 30S ribosomal protein S19	BPSL3209	Cytoplasmic	9.26
BPSL3210 ref|YP_109804.1|gi|53720818| 50S ribosomal protein L2	BPSL3210	Cytoplasmic	9.97
BPSL3211 ref|YP_109805.1|gi|53720819| 50S ribosomal protein L23	BPSL3211	Cytoplasmic	9.97
BPSL3212 ref|YP_109806.1|gi|53720820| 50S ribosomal protein L4	BPSL3212	Cytoplasmic	9.97
BPSL3213 ref|YP_109807.1|gi|53720821| 50S ribosomal protein L3	BPSL3213	Cytoplasmic	9.97
BPSL3214 ref|YP_109808.1|gi|53720822| 30S ribosomal protein S10	BPSL3214	Cytoplasmic	9.97
BPSL3215 ref|YP_109809.1|gi|53720823| elongation factor Tu	BPSL3215	Cytoplasmic	9.97
BPSL3216 ref|YP_109810.1|gi|53720824| elongation factor G	BPSL3216	Cytoplasmic	10
BPSL3217 ref|YP_109811.1|gi|53720825| 30S ribosomal protein S7	BPSL3217	Cytoplasmic	9.26
BPSL3218 ref|YP_109812.1|gi|53720826| 30S ribosomal protein S12	BPSL3218	Cytoplasmic	9.26
BPSL3219 ref|YP_109813.1|gi|53720827| ATP-dependent DNA helicase RecQ	BPSL3219	Cytoplasmic	9.97
BPSL3220 ref|YP_109814.1|gi|53720828| DNA-directed RNA polymerase subunit beta'	BPSL3220	Cytoplasmic	9.97
BPSL3221 ref|YP_109815.1|gi|53720829| DNA-directed RNA polymerase subunit beta	BPSL3221	Cytoplasmic	9.97
BPSL3223 ref|YP_109817.1|gi|53720831| 50S ribosomal protein L10	BPSL3223	Cytoplasmic	9.26
BPSL3224 ref|YP_109818.1|gi|53720832| 50S ribosomal protein L1	BPSL3224	Cytoplasmic	9.26
BPSL3225 ref|YP_109819.1|gi|53720833| 50S ribosomal protein L11	BPSL3225	Cytoplasmic	9.26
BPSL3226 ref|YP_109820.1|gi|53720834| transcription antitermination protein NusG	BPSL3226	Cytoplasmic	9.97
BPSL3228 ref|YP_109822.1|gi|53720836| elongation factor Tu	BPSL3228	Cytoplasmic	9.97
BPSL3233 ref|YP_109827.1|gi|53720841| phenylacetic acid degradation protein PaaD	BPSL3233	Cytoplasmic	8.96
BPSL3234 ref|YP_109828.1|gi|53720842| phenylacetic acid degradation NADH oxidoreductase PaaE	BPSL3234	Cytoplasmic	9.97
BPSL3236 ref|YP_109830.1|gi|53720844| TetR family transcriptional regulator	BPSL3236	Cytoplasmic	8.96
BPSL3237 ref|YP_109831.1|gi|53720845| hypothetical protein	BPSL3237	Cytoplasmic	8.96
BPSL3238 ref|YP_109832.1|gi|53720846| AsnC family transcriptional regulator	BPSL3238	Cytoplasmic	9.97
BPSL3239 ref|YP_109833.1|gi|53720847| 4-hydroxyphenylpyruvate dioxygenase	BPSL3239	Cytoplasmic	9.97
BPSL3242 ref|YP_109836.1|gi|53720850| malic enzyme	BPSL3242	Cytoplasmic	9.97
BPSL3243 ref|YP_109837.1|gi|53720851| orotate phosphoribosyltransferase	BPSL3243	Cytoplasmic	8.96
BPSL3246 ref|YP_109840.1|gi|53720854| N-acetyl-gamma-glutamyl-phosphate reductase	BPSL3246	Cytoplasmic	9.26
BPSL3253 ref|YP_109847.1|gi|53720861| oxidoreductase	BPSL3253	Cytoplasmic	9.26
BPSL3254 ref|YP_109848.1|gi|53720862| hypothetical protein	BPSL3254	Cytoplasmic	8.96
BPSL3257 ref|YP_109853.1|gi|53720867| plasmid recombinase	BPSL3257	Cytoplasmic	8.96
BPSL3264 ref|YP_109860.1|gi|53720874| conjugal transfer relaxase TraI	BPSL3264	Cytoplasmic	8.96
BPSL3269 ref|YP_109865.1|gi|53720879| hypothetical protein	BPSL3269	Cytoplasmic	8.96
BPSL3273 ref|YP_109869.1|gi|53720883| phosphosugar isomerase	BPSL3273	Cytoplasmic	9.97
BPSL3275 ref|YP_109871.1|gi|53720885| methylase	BPSL3275	Cytoplasmic	8.96
BPSL3277 ref|YP_109873.1|gi|53720887| metallo-beta-lactamase superfamily protein	BPSL3277	Cytoplasmic	9.97
BPSL3279 ref|YP_109875.1|gi|53720889| AsnC family transcriptional regulator	BPSL3279	Cytoplasmic	9.97
BPSL3282 ref|YP_109878.1|gi|53720892| hypothetical protein	BPSL3282	Cytoplasmic	8.96
BPSL3286 ref|YP_109882.1|gi|53720896| dienelactone hydrolase	BPSL3286	Cytoplasmic	8.96
BPSL3287 ref|YP_109883.1|gi|53720897| amidase	BPSL3287	Cytoplasmic	9.26
BPSL3288 ref|YP_109884.1|gi|53720898| 5,10-methylenetetrahydrofolate reductase	BPSL3288	Cytoplasmic	9.97
BPSL3290 ref|YP_109886.1|gi|53720900| S-adenosyl-L-homocysteine hydrolase	BPSL3290	Cytoplasmic	9.97
BPSL3291 ref|YP_109887.1|gi|53720901| flagellar biosynthesis sigma factor	BPSL3291	Cytoplasmic	8.96
BPSL3296 ref|YP_109892.1|gi|53720906| hypothetical protein	BPSL3296	Cytoplasmic	9.26
BPSL3299 ref|YP_109895.1|gi|53720909| chemotaxis regulator CheZ	BPSL3299	Cytoplasmic	9.97
BPSL3300 ref|YP_109896.1|gi|53720910| chemotaxis protein CheY	BPSL3300	Cytoplasmic	9.97
BPSL3301 ref|YP_109897.1|gi|53720911| chemotaxis-specific methylesterase	BPSL3301	Cytoplasmic	10
BPSL3302 ref|YP_109898.1|gi|53720912| chemoreceptor glutamine deamidase CheD	BPSL3302	Cytoplasmic	8.96
BPSL3303 ref|YP_109899.1|gi|53720913| chemotaxis protein methyltransferase	BPSL3303	Cytoplasmic	9.97
BPSL3305 ref|YP_109901.1|gi|53720915| chemotaxis protein CheW	BPSL3305	Cytoplasmic	9.97
BPSL3306 ref|YP_109902.1|gi|53720916| chemotaxis two-component sensor kinase CheA	BPSL3306	Cytoplasmic	9.97
BPSL3307 ref|YP_109903.1|gi|53720917| chemotaxis two-component response regulator CheY1	BPSL3307	Cytoplasmic	9.26
BPSL3310 ref|YP_109906.1|gi|53720920| transcriptional activator FlhC	BPSL3310	Cytoplasmic	9.26
BPSL3311 ref|YP_109907.1|gi|53720921| transcriptional activator FlhD	BPSL3311	Cytoplasmic	9.26
BPSL3312 ref|YP_109908.1|gi|53720922| glycosyltransferase	BPSL3312	Cytoplasmic	8.96
BPSL3315 ref|YP_109911.1|gi|53720925| Cof family hydrolase	BPSL3315	Cytoplasmic	8.96
BPSL3318 ref|YP_109914.1|gi|53720928| 30S ribosomal protein S21	BPSL3318	Cytoplasmic	9.26
BPSL3323 ref|YP_109919.1|gi|53720933| transferase	BPSL3323	Cytoplasmic	9.97
BPSL3324 ref|YP_109920.1|gi|53720934| keto/oxo acyl-ACP synthase	BPSL3324	Cytoplasmic	9.97
BPSL3326 ref|YP_109922.1|gi|53720936| keto/oxo acyl-ACP synthase	BPSL3326	Cytoplasmic	9.26
BPSL3327 ref|YP_109923.1|gi|53720937| short chain dehydrogenase	BPSL3327	Cytoplasmic	9.26
BPSL3329 ref|YP_109925.1|gi|53720939| Rieske (2Fe-2S) domain-containing protein	BPSL3329	Cytoplasmic	9.97
BPSL3337 ref|YP_109933.1|gi|53720947| hydrolase	BPSL3337	Cytoplasmic	9.97
BPSL3342 ref|YP_109938.1|gi|53720952| bacteriophage protein	BPSL3342	Cytoplasmic	8.96
BPSL3344 ref|YP_109940.1|gi|53720954| bacteriophage integrase	BPSL3344	Cytoplasmic	9.97
BPSL3346 ref|YP_109942.1|gi|53720956| hypothetical protein	BPSL3346	Cytoplasmic	8.96
BPSL3348 ref|YP_109944.1|gi|53720958| bacteriophage protein	BPSL3348	Cytoplasmic	8.96
BPSL3355 ref|YP_109950.1|gi|53720964| ATP-dependent DNA helicase Rep	BPSL3355	Cytoplasmic	9.97
BPSL3360 ref|YP_109955.1|gi|53720969| glycine cleavage system aminomethyltransferase T	BPSL3360	Cytoplasmic	9.97
BPSL3362 ref|YP_109957.1|gi|53720971| glycine dehydrogenase	BPSL3362	Cytoplasmic	9.97
BPSL3364 ref|YP_109959.1|gi|53720973| L-serine dehydratase I	BPSL3364	Cytoplasmic	9.26
BPSL3365 ref|YP_109960.1|gi|53720974| hypothetical protein	BPSL3365	Cytoplasmic	8.96
BPSL3366 ref|YP_109961.1|gi|53720975| thiamine pyrophosphate protein	BPSL3366	Cytoplasmic	9.97
BPSL3367 ref|YP_109962.1|gi|53720976| hypothetical protein	BPSL3367	Cytoplasmic	8.96
BPSL3368 ref|YP_109963.1|gi|53720977| AraC family transcriptional regulator	BPSL3368	Cytoplasmic	9.97
BPSL3369 ref|YP_109964.1|gi|53720978| acetaldehyde dehydrogenase	BPSL3369	Cytoplasmic	9.97
BPSL3371 ref|YP_109966.1|gi|53720980| ethanolamine ammonia-lyase small subunit	BPSL3371	Cytoplasmic	9.26
BPSL3372 ref|YP_109967.1|gi|53720981| ethanolamine ammonia-lyase heavy chain	BPSL3372	Cytoplasmic	9.97
BPSL3379 ref|YP_109973.1|gi|53720987| MerR family regulatory protein	BPSL3379	Cytoplasmic	9.97
BPSL3384 ref|YP_109976.1|gi|53720990| aminotransferase	BPSL3384	Cytoplasmic	9.26
BPSL3386 ref|YP_109978.1|gi|53720992| acyl-CoA dehydrogenase	BPSL3386	Cytoplasmic	9.97
BPSL3387 ref|YP_109979.1|gi|53720993| fatty-acid CoA ligase	BPSL3387	Cytoplasmic	9.97
BPSL3389 ref|YP_109981.1|gi|53720995| trifunctional transcriptional regulator/proline dehydrogenase/pyrroline-5-carboxylate dehydrogenase	BPSL3389	Cytoplasmic	9.97
BPSL3390 ref|YP_109983.1|gi|53720997| primosome assembly protein PriA	BPSL3390	Cytoplasmic	8.96
BPSL3391 ref|YP_109984.1|gi|53720998| uroporphyrinogen decarboxylase	BPSL3391	Cytoplasmic	9.97
BPSL3393 ref|YP_109986.1|gi|53721000| hypothetical protein	BPSL3393	Cytoplasmic	8.96
BPSL3394 ref|YP_109987.1|gi|53721001| AMP-binding protein	BPSL3394	Cytoplasmic	9.97
BPSL3395 ref|YP_109988.1|gi|53721002| ATP synthase F0F1 subunit epsilon	BPSL3395	Cytoplasmic	9.12
BPSL3396 ref|YP_109989.1|gi|53721003| ATP synthase F0F1 subunit beta	BPSL3396	Cytoplasmic	9.12
BPSL3397 ref|YP_109990.1|gi|53721004| ATP synthase F0F1 subunit gamma	BPSL3397	Cytoplasmic	9.12
BPSL3398 ref|YP_109991.1|gi|53721005| ATP synthase F0F1 subunit alpha	BPSL3398	Cytoplasmic	9.97
BPSL3399 ref|YP_109992.1|gi|53721006| ATP synthase F0F1 subunit delta	BPSL3399	Cytoplasmic	9.26
BPSL3405 ref|YP_109998.1|gi|53721012| chromosome partitioning protein ParB	BPSL3405	Cytoplasmic	9.97
BPSL3406 ref|YP_109999.1|gi|53721013| chromosome partitioning protein ParA	BPSL3406	Cytoplasmic	8.96
BPSL3408 ref|YP_110001.1|gi|53721015| tRNA uridine 5-carboxymethylaminomethyl modification enzyme GidA	BPSL3408	Cytoplasmic	9.97
BPSL3417 ref|YP_110010.1|gi|53721024| branched-chain amino acid ABC transporter ATP-binding subunit	BPSL3417	Cytoplasmic	9.12
BPSL3420 ref|YP_110013.1|gi|53721027| methylmalonic acid semialdehyde dehydrogenase	BPSL3420	Cytoplasmic	9.97
BPSL3421 ref|YP_110014.1|gi|53721028| LysR family transcriptional regulator	BPSL3421	Cytoplasmic	9.97
BPSL3422 ref|YP_110015.1|gi|53721029| adenylate cyclase	BPSL3422	Cytoplasmic	8.96
BPSL3423 ref|YP_110016.1|gi|53721030| AsnC family transcriptional regulator	BPSL3423	Cytoplasmic	9.97
BPSL3424 ref|YP_110017.1|gi|53721031| phenylalanine 4-monooxygenase	BPSL3424	Cytoplasmic	9.97
BPSL3426 ref|YP_110019.1|gi|53721033| two-component response regulator	BPSL3426	Cytoplasmic	9.97
BPSL3428 ref|YP_110021.1|gi|53721035| hypothetical protein	BPSL3428	Cytoplasmic	8.96
BPSL3429 ref|YP_110022.1|gi|53721036| NADH-dependent flavin oxidoreductase	BPSL3429	Cytoplasmic	9.97
BPSL3430 ref|YP_110023.1|gi|53721037| glutamine amidotransferase	BPSL3430	Cytoplasmic	9.97
BPSL3431 ref|YP_110024.1|gi|53721038| MarR family transcriptional regulator	BPSL3431	Cytoplasmic	9.97
BPSS0001 ref|YP_110025.1|gi|53721040| hypothetical protein	BPSS0001	Cytoplasmic	8.96
BPSS0004 ref|YP_110028.1|gi|53721043| DNA-binding protein	BPSS0004	Cytoplasmic	9.97
BPSS0005 ref|YP_110029.1|gi|53721044| 2-amino-3-ketobutyrate CoA ligase	BPSS0005	Cytoplasmic	9.97
BPSS0006 ref|YP_110030.1|gi|53721045| L-threonine 3-dehydrogenase	BPSS0006	Cytoplasmic	9.97
BPSS0008 ref|YP_110032.1|gi|53721047| TetR family transcriptional regulator	BPSS0008	Cytoplasmic	9.97
BPSS0009 ref|YP_110033.1|gi|53721048| hypothetical protein	BPSS0009	Cytoplasmic	8.96
BPSS0010 ref|YP_110034.1|gi|53721049| hypothetical protein	BPSS0010	Cytoplasmic	8.96
BPSS0011 ref|YP_110035.1|gi|53721050| tartrate dehydrogenase	BPSS0011	Cytoplasmic	9.97
BPSS0014 ref|YP_110038.1|gi|53721053| glutathione S-transferase like protein	BPSS0014	Cytoplasmic	9.26
BPSS0017 ref|YP_110041.1|gi|53721056| 3-hydroxybutyrate dehydrogenase	BPSS0017	Cytoplasmic	9.97
BPSS0018 ref|YP_110042.1|gi|53721057| acetoacetate decarboxylase	BPSS0018	Cytoplasmic	8.96
BPSS0021 ref|YP_110045.1|gi|53721060| iron transport/utilisation-like protein	BPSS0021	Cytoplasmic	9.97
BPSS0022 ref|YP_110046.1|gi|53721061| PadR-like family regulatory protein	BPSS0022	Cytoplasmic	8.96
BPSS0023 ref|YP_110047.1|gi|53721062| cytochrome monooxygenase-like protein	BPSS0023	Cytoplasmic	9.26
BPSS0025 ref|YP_110049.1|gi|53721064| hypothetical protein	BPSS0025	Cytoplasmic	8.96
BPSS0026 ref|YP_110050.1|gi|53721065| hypothetical protein	BPSS0026	Cytoplasmic	8.96
BPSS0027 ref|YP_110051.1|gi|53721066| hypothetical protein	BPSS0027	Cytoplasmic	8.96
BPSS0030 ref|YP_110054.1|gi|53721069| chromosome replication initiation inhibitor protein	BPSS0030	Cytoplasmic	9.97
BPSS0032 ref|YP_110056.1|gi|53721071| universal stress-related protein	BPSS0032	Cytoplasmic	8.96
BPSS0034 ref|YP_110058.1|gi|53721073| fatty aldehyde dehydrogenase	BPSS0034	Cytoplasmic	9.97
BPSS0038 ref|YP_110062.1|gi|53721077| serine acetyltransferase	BPSS0038	Cytoplasmic	9.97
BPSS0039 ref|YP_110063.1|gi|53721078| dehydrogenase	BPSS0039	Cytoplasmic	9.26
BPSS0040 ref|YP_110064.1|gi|53721079| GTP cyclohydrolase I	BPSS0040	Cytoplasmic	9.97
BPSS0041 ref|YP_110065.1|gi|53721080| LysR family transcriptional regulator	BPSS0041	Cytoplasmic	9.97
BPSS0042 ref|YP_110066.1|gi|53721081| 4-hydroxybenzoate 3-monooxygenase	BPSS0042	Cytoplasmic	9.97
BPSS0043 ref|YP_110067.1|gi|53721082| 3-oxoadipate CoA-transferase subunit A	BPSS0043	Cytoplasmic	9.97
BPSS0044 ref|YP_110068.1|gi|53721083| 3-oxoadipate CoA-transferase subunit B	BPSS0044	Cytoplasmic	9.97
BPSS0045 ref|YP_110069.1|gi|53721084| 3-carboxy-cis,cis-muconate cycloisomerase	BPSS0045	Cytoplasmic	9.26
BPSS0046 ref|YP_110070.1|gi|53721085| lactone hydrolase	BPSS0046	Cytoplasmic	8.96
BPSS0052 ref|YP_110076.1|gi|53721091| hypothetical protein	BPSS0052	Cytoplasmic	8.96
BPSS0054 ref|YP_110078.1|gi|53721093| chromate resistance exported protein	BPSS0054	Cytoplasmic	8.96
BPSS0057 ref|YP_110081.1|gi|53721096| RNA polymerase sigma factor	BPSS0057	Cytoplasmic	9.97
BPSS0058 ref|YP_110082.1|gi|53721097| excinuclease ABC subunit A	BPSS0058	Cytoplasmic	8.82
BPSS0060B ref|YP_110085.1|gi|53721100| H-NS-like DNA-binding protein	BPSS0060B	Cytoplasmic	8.96
BPSS0063 ref|YP_110088.1|gi|53721103| C4-dicarboxylate transport transcriptional response regulator	BPSS0063	Cytoplasmic	9.97
BPSS0066 ref|YP_110091.1|gi|53721106| AraC family transcriptional regulator	BPSS0066	Cytoplasmic	9.26
BPSS0070 ref|YP_110094.1|gi|53721109| transposase	BPSS0070	Cytoplasmic	8.96
BPSS0073 ref|YP_110095.1|gi|53721110| regulatory protein	BPSS0073	Cytoplasmic	9.97
BPSS0078 ref|YP_110101.1|gi|53721116| hypothetical protein	BPSS0078	Cytoplasmic	9.26
BPSS0095 ref|YP_110118.1|gi|53721133| type VI secretion system-associated protein TssL-2a	BPSS0095	Cytoplasmic	8.96
BPSS0097 ref|YP_110120.1|gi|53721135| type VI secretion system protein TssB-2	BPSS0097	Cytoplasmic	9.26
BPSS0098 ref|YP_110121.1|gi|53721136| type VI secretion system protein TssC-2	BPSS0098	Cytoplasmic	9.97
BPSS0101 ref|YP_110124.1|gi|53721139| type VI secretion system protein TssK-2	BPSS0101	Cytoplasmic	9.97
BPSS0108 ref|YP_110129.1|gi|53721144| hypothetical protein	BPSS0108	Cytoplasmic	8.96
BPSS0110 ref|YP_110131.1|gi|53721146| type VI secretion system protein TssA-2	BPSS0110	Cytoplasmic	8.96
BPSS0112 ref|YP_110133.1|gi|53721148| type VI secretion system protein TssF-2	BPSS0112	Cytoplasmic	8.96
BPSS0115 ref|YP_110136.1|gi|53721151| type VI secretion system-associated protein TagK-2	BPSS0115	Cytoplasmic	8.96
BPSS0116 ref|YP_110137.1|gi|53721152| type VI secretion system protein TssH-2	BPSS0116	Cytoplasmic	9.97
BPSS0119 ref|YP_110140.1|gi|53721155| two-component system response regulator	BPSS0119	Cytoplasmic	9.26
BPSS0124 ref|YP_110145.1|gi|53721160| response regulator	BPSS0124	Cytoplasmic	9.97
BPSS0127 ref|YP_110148.1|gi|53721163| glycerate kinase 1	BPSS0127	Cytoplasmic	9.97
BPSS0128 ref|YP_110149.1|gi|53721164| pyruvate kinase	BPSS0128	Cytoplasmic	9.97
BPSS0129 ref|YP_110150.1|gi|53721165| transcriptional regulator	BPSS0129	Cytoplasmic	9.97
BPSS0130 ref|YP_110151.1|gi|53721166| peptide synthase	BPSS0130	Cytoplasmic	9.26
BPSS0131 ref|YP_110152.1|gi|53721167| dehydratase	BPSS0131	Cytoplasmic	8.96
BPSS0132 ref|YP_110153.1|gi|53721168| hypothetical protein	BPSS0132	Cytoplasmic	8.96
BPSS0133 ref|YP_110154.1|gi|53721169| methyltransferase	BPSS0133	Cytoplasmic	9.97
BPSS0139 ref|YP_110160.1|gi|53721175| mercuric reductase	BPSS0139	Cytoplasmic	9.97
BPSS0143 ref|YP_110164.1|gi|53721179| transcriptional regulator	BPSS0143	Cytoplasmic	8.96
BPSS0145 ref|YP_110166.1|gi|53721181| ATP-dependent RNA helicase DbpA	BPSS0145	Cytoplasmic	9.97
BPSS0148 ref|YP_110169.1|gi|53721184| hypothetical protein	BPSS0148	Cytoplasmic	8.96
BPSS0149 ref|YP_110170.1|gi|53721185| LysR family transcriptional regulator	BPSS0149	Cytoplasmic	9.97
BPSS0155 ref|YP_110176.1|gi|53721191| LysR family transcriptional regulator	BPSS0155	Cytoplasmic	9.97
BPSS0160 ref|YP_110181.1|gi|53721196| siderophore biosynthesis-related protein	BPSS0160	Cytoplasmic	9.97
BPSS0161 ref|YP_110182.1|gi|53721197| siderophore biosynthesis-related protein	BPSS0161	Cytoplasmic	9.26
BPSS0162 ref|YP_110183.1|gi|53721198| siderophore biosynthesis-related protein	BPSS0162	Cytoplasmic	9.26
BPSS0163 ref|YP_110184.1|gi|53721199| asparagine synthase	BPSS0163	Cytoplasmic	9.97
BPSS0164 ref|YP_110185.1|gi|53721200| quinone oxidoreductase	BPSS0164	Cytoplasmic	9.97
BPSS0166 ref|YP_110187.1|gi|53721202| LysR family transcriptional regulator	BPSS0166	Cytoplasmic	9.97
BPSS0169 ref|YP_110190.1|gi|53721205| type VI secretion system protein TssK-3 (T6SS-4)	BPSS0169	Cytoplasmic	9.97
BPSS0172 ref|YP_110193.1|gi|53721208| type VI secretion system protein TssC-3 (T6SS-4)	BPSS0172	Cytoplasmic	9.26
BPSS0174 ref|YP_110195.1|gi|53721210| type VI secretion system protein TssH-3 (T6SS-4)	BPSS0174	Cytoplasmic	9.97
BPSS0177 ref|YP_110198.1|gi|53721213| type VI secretion system protein TssE-3 (T6SS-4)	BPSS0177	Cytoplasmic	8.96
BPSS0178 ref|YP_110199.1|gi|53721214| type VI secretion system protein TssF-3 (T6SS-4)	BPSS0178	Cytoplasmic	8.96
BPSS0179 ref|YP_110200.1|gi|53721215| type VI secretion system protein TssG-3 (T6SS-4)	BPSS0179	Cytoplasmic	8.96
BPSS0180 ref|YP_110201.1|gi|53721216| type VI secretion system protein TssA-3 (T6SS-4)	BPSS0180	Cytoplasmic	8.96
BPSS0181 ref|YP_110202.1|gi|53721217| type VI secretion system protein TssI-3 (T6SS-4)	BPSS0181	Cytoplasmic	9.97
BPSS0184 ref|YP_110205.1|gi|53721220| type VI secretion system-associated protein TagC-3 (T6SS-4)	BPSS0184	Cytoplasmic	8.96
BPSS0187 ref|YP_110208.1|gi|53721223| LysR family transcriptional regulator	BPSS0187	Cytoplasmic	9.26
BPSS0188 ref|YP_110209.1|gi|53721224| dehydrogenase	BPSS0188	Cytoplasmic	9.97
BPSS0190 ref|YP_110210.1|gi|53721225| O-acetylhomoserine	BPSS0190	Cytoplasmic	9.97
BPSS0194 ref|YP_110214.1|gi|53721229| hypothetical protein	BPSS0194	Cytoplasmic	9.97
BPSS0195 ref|YP_110215.1|gi|53721230| hypothetical protein	BPSS0195	Cytoplasmic	9.97
BPSS0196 ref|YP_110216.1|gi|53721231| acetyl-CoA carboxylase biotin carboxylase subunit	BPSS0196	Cytoplasmic	9.97
BPSS0198 ref|YP_110218.1|gi|53721233| hypothetical protein	BPSS0198	Cytoplasmic	8.96
BPSS0201 ref|YP_110221.1|gi|53721236| prolyl iminopeptidase	BPSS0201	Cytoplasmic	9.97
BPSS0205 ref|YP_110225.1|gi|53721240| sigma interaction transcriptional regulator	BPSS0205	Cytoplasmic	9.97
BPSS0206 ref|YP_110226.1|gi|53721241| 2-methylisocitrate lyase	BPSS0206	Cytoplasmic	9.97
BPSS0207 ref|YP_110227.1|gi|53721242| methylcitrate synthase	BPSS0207	Cytoplasmic	9.97
BPSS0208 ref|YP_110228.1|gi|53721243| aconitate hydratase	BPSS0208	Cytoplasmic	9.97
BPSS0209 ref|YP_110229.1|gi|53721244| hypothetical protein	BPSS0209	Cytoplasmic	9.97
BPSS0214 ref|YP_110234.1|gi|53721249| heme/metallo cofactor biosynthesis-like protein	BPSS0214	Cytoplasmic	9.97
BPSS0217 ref|YP_110237.1|gi|53721252| LysR family transcriptional regulator	BPSS0217	Cytoplasmic	9.26
BPSS0221A ref|YP_110241.1|gi|53721256| hypothetical protein	BPSS0221A	Cytoplasmic	8.96
BPSS0236 ref|YP_110255.1|gi|53721270| L-allo-threonine aldolase	BPSS0236	Cytoplasmic	9.97
BPSS0237 ref|YP_110256.1|gi|53721271| chromosome replication initiation inhibitor protein	BPSS0237	Cytoplasmic	9.26
BPSS0243 ref|YP_110262.1|gi|53721277| BhuS	BPSS0243	Cytoplasmic	9.97
BPSS0246 ref|YP_110265.1|gi|53721280| LysR family transcriptional regulator	BPSS0246	Cytoplasmic	9.26
BPSS0253 ref|YP_110272.1|gi|53721287| DNA-binding protein	BPSS0253	Cytoplasmic	8.96
BPSS0254 ref|YP_110273.1|gi|53721288| ribose 5-phosphate isomerase	BPSS0254	Cytoplasmic	8.96
BPSS0258 ref|YP_110277.1|gi|53721292| short chain dehydrogenase	BPSS0258	Cytoplasmic	9.26
BPSS0259 ref|YP_110278.1|gi|53721293| dehydrogenase	BPSS0259	Cytoplasmic	9.97
BPSS0262 ref|YP_110281.1|gi|53721296| aminoglycoside 6'-N-acetyltransferase	BPSS0262	Cytoplasmic	8.96
BPSS0267 ref|YP_110286.1|gi|53721301| hypothetical protein	BPSS0267	Cytoplasmic	9.97
BPSS0270 ref|YP_110290.1|gi|53721305| LysR family transcriptional regulator	BPSS0270	Cytoplasmic	9.97
BPSS0271 ref|YP_110291.1|gi|53721306| peptidase	BPSS0271	Cytoplasmic	8.96
BPSS0273 ref|YP_110293.1|gi|53721308| TetR family transcriptional regulator	BPSS0273	Cytoplasmic	9.97
BPSS0274 ref|YP_110294.1|gi|53721309| IclR family transcriptional regulator	BPSS0274	Cytoplasmic	9.26
BPSS0275 ref|YP_110295.1|gi|53721310| beta-ketoadipyl CoA thiolase	BPSS0275	Cytoplasmic	9.97
BPSS0278 ref|YP_110298.1|gi|53721313| oxygenase	BPSS0278	Cytoplasmic	8.96
BPSS0280 ref|YP_110300.1|gi|53721315| succinate-semialdehyde dehydrogenase	BPSS0280	Cytoplasmic	9.26
BPSS0281 ref|YP_110301.1|gi|53721316| 4-aminobutyrate aminotransferase	BPSS0281	Cytoplasmic	9.97
BPSS0282 ref|YP_110302.1|gi|53721317| GntR family transcriptional regulator	BPSS0282	Cytoplasmic	9.97
BPSS0284 ref|YP_110304.1|gi|53721319| IclR family transcriptional regulator	BPSS0284	Cytoplasmic	9.97
BPSS0290 ref|YP_110310.1|gi|53721325| LysR family transcriptional regulator	BPSS0290	Cytoplasmic	9.97
BPSS0291 ref|YP_110311.1|gi|53721326| carboxylesterase	BPSS0291	Cytoplasmic	9.97
BPSS0296 ref|YP_110316.1|gi|53721331| GntR family transcriptional regulator	BPSS0296	Cytoplasmic	9.97
BPSS0299 ref|YP_110319.1|gi|53721334| fatty-acid CoA ligase	BPSS0299	Cytoplasmic	9.97
BPSS0300 ref|YP_110320.1|gi|53721335| malonyl CoA-ACP transacylase	BPSS0300	Cytoplasmic	9.97
BPSS0302 ref|YP_110322.1|gi|53721337| fatty acid biosynthesis-related CoA ligase	BPSS0302	Cytoplasmic	9.97
BPSS0303 ref|YP_110323.1|gi|53721338| diaminopimelate decarboxylase	BPSS0303	Cytoplasmic	9.26
BPSS0305 ref|YP_110325.1|gi|53721340| ketol-acid reductoisomerase	BPSS0305	Cytoplasmic	9.97
BPSS0308 ref|YP_110328.1|gi|53721343| hypothetical protein	BPSS0308	Cytoplasmic	9.97
BPSS0309 ref|YP_110329.1|gi|53721344| peptide synthase regulatory protein	BPSS0309	Cytoplasmic	9.97
BPSS0310 ref|YP_110330.1|gi|53721345| hypothetical protein	BPSS0310	Cytoplasmic	8.96
BPSS0312 ref|YP_110332.1|gi|53721347| LuxR family transcriptional regulator	BPSS0312	Cytoplasmic	9.26
BPSS0314 ref|YP_110334.1|gi|53721349| monooxygenase	BPSS0314	Cytoplasmic	9.97
BPSS0318 ref|YP_110338.1|gi|53721353| hypothetical protein	BPSS0318	Cytoplasmic	8.96
BPSS0319 ref|YP_110339.1|gi|53721354| hypothetical protein	BPSS0319	Cytoplasmic	8.96
BPSS0320 ref|YP_110340.1|gi|53721355| GntR family transcriptional regulator	BPSS0320	Cytoplasmic	9.97
BPSS0322 ref|YP_110342.1|gi|53721357| iron-sulfur binding protein	BPSS0322	Cytoplasmic	8.96
BPSS0328 ref|YP_110348.1|gi|53721363| malate/L-lactate dehydrogenase	BPSS0328	Cytoplasmic	9.97
BPSS0329 ref|YP_110349.1|gi|53721364| fatty aldehyde dehydrogenase	BPSS0329	Cytoplasmic	9.97
BPSS0331 ref|YP_110351.1|gi|53721366| dihydrodipicolinate synthase	BPSS0331	Cytoplasmic	9.97
BPSS0336 ref|YP_110356.1|gi|53721371| AraC family transcriptional regulator	BPSS0336	Cytoplasmic	9.97
BPSS0338 ref|YP_110358.2|gi|53721373| insertion element protein	BPSS0338	Cytoplasmic	8.96
BPSS0339 ref|YP_110359.1|gi|53721374| amino acid dioxygenase	BPSS0339	Cytoplasmic	9.97
BPSS0340 ref|YP_110360.1|gi|53721375| 3-dehydroquinate dehydratase	BPSS0340	Cytoplasmic	9.26
BPSS0341 ref|YP_110361.1|gi|53721376| shikimate 5-dehydrogenase	BPSS0341	Cytoplasmic	9.97
BPSS0343 ref|YP_110363.1|gi|53721378| 2-aminoethylphosphonate--pyruvate transaminase	BPSS0343	Cytoplasmic	9.97
BPSS0349 ref|YP_110369.1|gi|53721384| NADP-dependent glyceraldehyde-3-phosphate dehydrogenase	BPSS0349	Cytoplasmic	9.97
BPSS0350 ref|YP_110370.1|gi|53721385| hypothetical protein	BPSS0350	Cytoplasmic	8.96
BPSS0351 ref|YP_110371.1|gi|53721386| MerR family transcriptional regulator	BPSS0351	Cytoplasmic	9.97
BPSS0352 ref|YP_110372.1|gi|53721387| hypothetical protein	BPSS0352	Cytoplasmic	8.96
BPSS0353 ref|YP_110373.1|gi|53721388| potassium channel subunit	BPSS0353	Cytoplasmic	9.26
BPSS0354 ref|YP_110374.1|gi|53721389| 3-hydroxybutyrate dehydrogenase	BPSS0354	Cytoplasmic	9.97
BPSS0355 ref|YP_110375.1|gi|53721390| aromatic amino acid aminotransferase	BPSS0355	Cytoplasmic	9.97
BPSS0356 ref|YP_110376.1|gi|53721391| excinuclease ABC subunit B	BPSS0356	Cytoplasmic	9.97
BPSS0363 ref|YP_110383.1|gi|53721398| hypothetical protein	BPSS0363	Cytoplasmic	9.97
BPSS0364 ref|YP_110384.1|gi|53721399| chromosome condensation protein	BPSS0364	Cytoplasmic	9.97
BPSS0365 ref|YP_110385.1|gi|53721400| LysR family transcriptional regulator	BPSS0365	Cytoplasmic	9.26
BPSS0371 ref|YP_110391.1|gi|53721406| bacterioferritin	BPSS0371	Cytoplasmic	9.97
BPSS0372 ref|YP_110392.1|gi|53721407| fumarate hydratase	BPSS0372	Cytoplasmic	9.97
BPSS0375 ref|YP_110395.1|gi|53721410| acetyl-CoA synthetase	BPSS0375	Cytoplasmic	9.97
BPSS0378 ref|YP_110398.1|gi|53721413| phage integrase	BPSS0378	Cytoplasmic	8.96
BPSS0384 ref|YP_110406.1|gi|53721421| hypothetical protein	BPSS0384	Cytoplasmic	8.96
BPSS0385 ref|YP_110408.1|gi|53721423| hypothetical protein	BPSS0385	Cytoplasmic	8.96
BPSS0388 ref|YP_110411.1|gi|53721426| hypothetical protein	BPSS0388	Cytoplasmic	8.96
BPSS0391 ref|YP_110414.1|gi|53721429| hypothetical protein	BPSS0391	Cytoplasmic	8.96
BPSS0391A ref|YP_110415.1|gi|53721430| hypothetical protein	BPSS0391A	Cytoplasmic	8.96
BPSS0414 ref|YP_110437.1|gi|53721452| acetolactate synthase	BPSS0414	Cytoplasmic	9.26
BPSS0419 ref|YP_110443.1|gi|53721458| glucose-1-phosphate cytidylyltransferase	BPSS0419	Cytoplasmic	8.96
BPSS0420 ref|YP_110444.1|gi|53721459| CDP-glucose 4,6-dehydratase	BPSS0420	Cytoplasmic	9.26
BPSS0421 ref|YP_110445.1|gi|53721460| lipopolysaccharide biosynthesis protein	BPSS0421	Cytoplasmic	9.97
BPSS0422 ref|YP_110446.1|gi|53721461| aminotransferase	BPSS0422	Cytoplasmic	9.97
BPSS0425 ref|YP_110449.1|gi|53721464| heptosyltransferase (O-antigen related)	BPSS0425	Cytoplasmic	9.26
BPSS0431 ref|YP_110454.1|gi|53721469| LysR family transcriptional regulator	BPSS0431	Cytoplasmic	9.97
BPSS0432 ref|YP_110455.1|gi|53721470| hypothetical protein	BPSS0432	Cytoplasmic	9.97
BPSS0434 ref|YP_110457.1|gi|53721472| hypothetical protein	BPSS0434	Cytoplasmic	8.96
BPSS0435 ref|YP_110458.1|gi|53721473| AraC family transcriptional regulator	BPSS0435	Cytoplasmic	9.26
BPSS0436 ref|YP_110459.1|gi|53721474| AraC family transcriptional regulator	BPSS0436	Cytoplasmic	9.26
BPSS0438 ref|YP_110461.1|gi|53721476| LysR family transcriptional regulator	BPSS0438	Cytoplasmic	9.26
BPSS0444 ref|YP_110467.1|gi|53721482| non-heme chloroperoxidase	BPSS0444	Cytoplasmic	9.26
BPSS0446 ref|YP_110468.1|gi|53721483| hypothetical protein	BPSS0446	Cytoplasmic	9.26
BPSS0449 ref|YP_110471.1|gi|53721486| GntR family transcriptional regulator	BPSS0449	Cytoplasmic	9.26
BPSS0452 ref|YP_110474.1|gi|53721489| phosphoesterase	BPSS0452	Cytoplasmic	8.96
BPSS0461 ref|YP_110483.1|gi|53721498| oxidoreductase	BPSS0461	Cytoplasmic	9.97
BPSS0462 ref|YP_110484.1|gi|53721499| oxidoreductase	BPSS0462	Cytoplasmic	9.97
BPSS0468 ref|YP_110490.1|gi|53721505| aminotransferase	BPSS0468	Cytoplasmic	9.97
BPSS0469 ref|YP_110491.1|gi|53721506| glutamine synthetase	BPSS0469	Cytoplasmic	9.97
BPSS0470 ref|YP_110492.1|gi|53721507| glutamine amidotransferase	BPSS0470	Cytoplasmic	8.96
BPSS0472 ref|YP_110494.1|gi|53721509| MerR family transcriptional regulator	BPSS0472	Cytoplasmic	9.97
BPSS0473 ref|YP_110495.1|gi|53721510| aldehyde dehydrogenase	BPSS0473	Cytoplasmic	9.26
BPSS0474 ref|YP_110496.1|gi|53721511| agmatinase	BPSS0474	Cytoplasmic	8.96
BPSS0476 ref|YP_110498.1|gi|53721513| co-chaperonin GroES	BPSS0476	Cytoplasmic	9.26
BPSS0477 ref|YP_110499.1|gi|53721514| molecular chaperone GroEL	BPSS0477	Cytoplasmic	9.97
BPSS0479 ref|YP_110501.1|gi|53721516| ribonucleotide reductase	BPSS0479	Cytoplasmic	9.97
BPSS0481 ref|YP_110503.1|gi|53721518| HhqA	BPSS0481	Cytoplasmic	9.97
BPSS0483 ref|YP_110505.1|gi|53721520| HhqC	BPSS0483	Cytoplasmic	9.97
BPSS0484 ref|YP_110506.1|gi|53721521| HhqD	BPSS0484	Cytoplasmic	9.97
BPSS0485 ref|YP_110507.1|gi|53721522| HhqE	BPSS0485	Cytoplasmic	9.26
BPSS0487 ref|YP_110509.1|gi|53721524| hypothetical protein	BPSS0487	Cytoplasmic	8.96
BPSS0492 ref|YP_110513.1|gi|53721528| alkyl hydroperoxide reductase	BPSS0492	Cytoplasmic	9.97
BPSS0496 ref|YP_110517.1|gi|53721532| hypothetical protein	BPSS0496	Cytoplasmic	8.96
BPSS0498 ref|YP_110519.1|gi|53721534| transglutaminase-like superfamily protein	BPSS0498	Cytoplasmic	8.96
BPSS0499 ref|YP_110520.1|gi|53721535| transglutaminase-like superfamily protein	BPSS0499	Cytoplasmic	9.97
BPSS0500 ref|YP_110521.1|gi|53721536| hypothetical protein	BPSS0500	Cytoplasmic	8.96
BPSS0501 ref|YP_110522.1|gi|53721537| transglutaminase-like superfamily protein	BPSS0501	Cytoplasmic	9.26
BPSS0502 ref|YP_110523.1|gi|53721538| GntR family transcriptional regulator	BPSS0502	Cytoplasmic	9.97
BPSS0505 ref|YP_110526.1|gi|53721541| AraC family transcriptional regulator	BPSS0505	Cytoplasmic	8.96
BPSS0507 ref|YP_110528.1|gi|53721543| aminotransferase class-V	BPSS0507	Cytoplasmic	9.97
BPSS0509 ref|YP_110530.1|gi|53721545| hypothetical protein	BPSS0509	Cytoplasmic	9.26
BPSS0510 ref|YP_110531.1|gi|53721546| hypothetical protein	BPSS0510	Cytoplasmic	8.96
BPSS0512 ref|YP_110533.1|gi|53721548| hypothetical protein	BPSS0512	Cytoplasmic	8.96
BPSS0514 ref|YP_110535.1|gi|53721550| acetyl-CoA hydrolase/transferase	BPSS0514	Cytoplasmic	9.26
BPSS0515 ref|YP_110536.1|gi|53721551| type VI secretion system protein TssI-6	BPSS0515	Cytoplasmic	8.96
BPSS0516 ref|YP_110537.1|gi|53721552| type VI secretion system protein TssH-6	BPSS0516	Cytoplasmic	9.97
BPSS0517 ref|YP_110538.1|gi|53721553| type VI secretion system protein TssG-6	BPSS0517	Cytoplasmic	9.97
BPSS0520 ref|YP_110541.1|gi|53721556| type VI secretion system protein TssD-6	BPSS0520	Cytoplasmic	8.96
BPSS0521 ref|YP_110542.1|gi|53721557| type VI secretion system protein TssC-6	BPSS0521	Cytoplasmic	8.96
BPSS0522 ref|YP_110543.1|gi|53721558| type VI secretion system protein TssB-6	BPSS0522	Cytoplasmic	9.26
BPSS0525 ref|YP_110546.1|gi|53721561| type VI secretion system-associated protein TagF-6	BPSS0525	Cytoplasmic	8.96
BPSS0526 ref|YP_110547.1|gi|53721562| type VI secretion system protein TssM-6	BPSS0526	Cytoplasmic	8.96
BPSS0527 ref|YP_110548.1|gi|53721563| type VI secretion system protein TssL-6	BPSS0527	Cytoplasmic	8.96
BPSS0530 ref|YP_110551.1|gi|53721566| type VI secretion system-associated protein TagI-6	BPSS0530	Cytoplasmic	9.97
BPSS0536 ref|YP_110557.1|gi|53721572| 3-hydroxydecanoyl-ACP:CoA transacylase	BPSS0536	Cytoplasmic	9.97
BPSS0544 ref|YP_110565.1|gi|53721580| LacI family regulatory protein	BPSS0544	Cytoplasmic	9.97
BPSS0545 ref|YP_110566.1|gi|53721581| glutathione-independent formaldehyde dehydrogenase	BPSS0545	Cytoplasmic	9.97
BPSS0546 ref|YP_110567.1|gi|53721582| AraC family transcriptional regulator	BPSS0546	Cytoplasmic	9.26
BPSS0547 ref|YP_110568.1|gi|53721583| serine hydroxymethyltransferase	BPSS0547	Cytoplasmic	9.97
BPSS0548 ref|YP_110569.1|gi|53721584| family M19 non-peptidase	BPSS0548	Cytoplasmic	8.96
BPSS0550 ref|YP_110571.1|gi|53721586| NADH:flavin oxidoreductase / NADH oxidase	BPSS0550	Cytoplasmic	9.97
BPSS0552 ref|YP_110573.1|gi|53721588| electron transfer flavoprotein subunit alpha	BPSS0552	Cytoplasmic	8.96
BPSS0553 ref|YP_110574.1|gi|53721589| electron transfer flavoprotein subunit beta	BPSS0553	Cytoplasmic	8.96
BPSS0554 ref|YP_110575.1|gi|53721590| (Fe-S)-binding protein	BPSS0554	Cytoplasmic	9.97
BPSS0555 ref|YP_110576.1|gi|53721591| ferredoxin oxidoreductase	BPSS0555	Cytoplasmic	9.97
BPSS0558 ref|YP_110579.1|gi|53721594| formyltetrahydrofolate deformylase	BPSS0558	Cytoplasmic	9.97
BPSS0559 ref|YP_110580.1|gi|53721595| LysR family transcriptional regulator	BPSS0559	Cytoplasmic	9.26
BPSS0560 ref|YP_110581.1|gi|53721596| choline-sulfatase	BPSS0560	Cytoplasmic	9.97
BPSS0565 ref|YP_110586.1|gi|53721601| AraC family transcriptional regulator	BPSS0565	Cytoplasmic	9.97
BPSS0567 ref|YP_110588.1|gi|53721603| hypothetical protein	BPSS0567	Cytoplasmic	9.97
BPSS0568 ref|YP_110589.1|gi|53721604| 3-hydroxybutyryl-CoA dehydrogenase	BPSS0568	Cytoplasmic	9.97
BPSS0569 ref|YP_110590.1|gi|53721605| hypothetical protein	BPSS0569	Cytoplasmic	8.96
BPSS0572 ref|YP_110593.1|gi|53721608| short-chain dehydrogenase	BPSS0572	Cytoplasmic	8.96
BPSS0581 ref|YP_110602.1|gi|53721617| salicylate biosynthesis isochorismate synthase	BPSS0581	Cytoplasmic	9.97
BPSS0583 ref|YP_110604.1|gi|53721619| pyochelin biosynthetic protein	BPSS0583	Cytoplasmic	9.97
BPSS0584 ref|YP_110605.1|gi|53721620| salicyl-AMP ligase	BPSS0584	Cytoplasmic	9.97
BPSS0585 ref|YP_110606.1|gi|53721621| AraC family transcriptional regulator	BPSS0585	Cytoplasmic	9.26
BPSS0587 ref|YP_110608.1|gi|53721623| pyochelin synthetase	BPSS0587	Cytoplasmic	9.97
BPSS0596 ref|YP_110617.1|gi|53721632| Fis family transcriptional regulator	BPSS0596	Cytoplasmic	9.97
BPSS0607 ref|YP_110628.1|gi|53721643| aldehyde dehydrogenase	BPSS0607	Cytoplasmic	9.97
BPSS0608 ref|YP_110629.1|gi|53721644| TauD/TfdA family dioxygenase	BPSS0608	Cytoplasmic	9.97
BPSS0609 ref|YP_110630.1|gi|53721645| thiamine pyrophosphate enzyme family protein	BPSS0609	Cytoplasmic	8.96
BPSS0610 ref|YP_110631.1|gi|53721646| phosphoenolpyruvate phosphomutase	BPSS0610	Cytoplasmic	9.97
BPSS0611 ref|YP_110632.1|gi|53721647| hypothetical protein	BPSS0611	Cytoplasmic	9.97
BPSS0612 ref|YP_110633.1|gi|53721648| short chain dehydrogenase	BPSS0612	Cytoplasmic	9.97
BPSS0613 ref|YP_110634.1|gi|53721649| hypothetical protein	BPSS0613	Cytoplasmic	9.97
BPSS0616 ref|YP_110637.1|gi|53721652| AraC family transcriptional regulator	BPSS0616	Cytoplasmic	9.26
BPSS0617 ref|YP_110638.1|gi|53721653| acyl-CoA dehydrogenase	BPSS0617	Cytoplasmic	9.97
BPSS0619 ref|YP_110640.1|gi|53721655| methylmalonate-semialdehyde dehydrogenase	BPSS0619	Cytoplasmic	9.97
BPSS0620 ref|YP_110641.1|gi|53721656| 3-hydroxyisobutyrate dehydrogenase	BPSS0620	Cytoplasmic	9.26
BPSS0621 ref|YP_110642.1|gi|53721657| enoyl-CoA hydratase	BPSS0621	Cytoplasmic	9.26
BPSS0622 ref|YP_110643.1|gi|53721658| enoyl-CoA hydratase	BPSS0622	Cytoplasmic	9.97
BPSS0626 ref|YP_110647.1|gi|53721662| luciferase-like monooxygenase	BPSS0626	Cytoplasmic	9.26
BPSS0630 ref|YP_110651.1|gi|53721666| response regulator protein	BPSS0630	Cytoplasmic	9.97
BPSS0633 ref|YP_110654.1|gi|53721669| rod shape-determining protein MreB	BPSS0633	Cytoplasmic	9.97
BPSS0634 ref|YP_110655.1|gi|53721670| hypothetical protein	BPSS0634	Cytoplasmic	9.97
BPSS0635 ref|YP_110656.1|gi|53721671| hypothetical protein	BPSS0635	Cytoplasmic	8.96
BPSS0639 ref|YP_110658.1|gi|53721673| glyoxalase/bleomycin resistance protein/dioxygenase superfamily protein	BPSS0639	Cytoplasmic	8.96
BPSS0640 ref|YP_110659.1|gi|53721674| glutathione S-transferase	BPSS0640	Cytoplasmic	9.97
BPSS0641 ref|YP_110660.1|gi|53721675| hypothetical protein	BPSS0641	Cytoplasmic	9.97
BPSS0643 ref|YP_110662.1|gi|53721677| response regulator protein	BPSS0643	Cytoplasmic	9.97
BPSS0644 ref|YP_110663.1|gi|53721678| DNA-binding protein	BPSS0644	Cytoplasmic	9.26
BPSS0648 ref|YP_110667.1|gi|53721682| transcriptional activator FtrA	BPSS0648	Cytoplasmic	9.97
BPSS0650 ref|YP_110669.1|gi|53721684| peptidase	BPSS0650	Cytoplasmic	8.96
BPSS0664 ref|YP_110679.1|gi|53721694| response regulator protein	BPSS0664	Cytoplasmic	9.97
BPSS0665 ref|YP_110680.1|gi|53721695| alpha-ketoglutarate-dependent taurine dioxygenase	BPSS0665	Cytoplasmic	9.97
BPSS0669 ref|YP_110683.1|gi|53721698| hypothetical protein	BPSS0669	Cytoplasmic	8.96
BPSS0675 ref|YP_110689.1|gi|53721704| GerR family regulatory protein	BPSS0675	Cytoplasmic	8.96
BPSS0677 ref|YP_110691.1|gi|53721706| asparagine synthetase	BPSS0677	Cytoplasmic	9.97
BPSS0680 ref|YP_110693.1|gi|53721708| oxidoreductase subunit alpha	BPSS0680	Cytoplasmic	9.26
BPSS0681 ref|YP_110694.1|gi|53721709| AraC family transcriptional regulator	BPSS0681	Cytoplasmic	9.97
BPSS0684 ref|YP_110697.1|gi|53721712| hypothetical protein	BPSS0684	Cytoplasmic	8.96
BPSS0686 ref|YP_110699.1|gi|53721714| hypothetical protein	BPSS0686	Cytoplasmic	9.97
BPSS0688 ref|YP_110702.1|gi|53721717| two-component response regulator BprR	BPSS0688	Cytoplasmic	9.97
BPSS0691 ref|YP_110705.1|gi|53721720| MarR family transcriptional regulator	BPSS0691	Cytoplasmic	9.97
BPSS0692 ref|YP_110706.1|gi|53721721| fumarylacetoacetate (FAA) hydrolase	BPSS0692	Cytoplasmic	8.96
BPSS0693 ref|YP_110707.1|gi|53721722| fumarylacetoacetate (FAA) hydrolase	BPSS0693	Cytoplasmic	9.97
BPSS0694 ref|YP_110708.1|gi|53721723| 5-carboxymethyl-2-hydroxymuconate semialdehyde dehydrogenase	BPSS0694	Cytoplasmic	9.97
BPSS0695 ref|YP_110709.1|gi|53721724| 3,4-dihydroxyphenylacetate 2,3-dioxygenase	BPSS0695	Cytoplasmic	8.96
BPSS0696 ref|YP_110710.1|gi|53721725| 5-carboxymethyl-2-hydroxymuconate delta-isomerase	BPSS0696	Cytoplasmic	8.96
BPSS0697 ref|YP_110711.1|gi|53721726| 2-oxo-hepta-3-ene-1,7-dioic acid hydratase	BPSS0697	Cytoplasmic	8.96
BPSS0698 ref|YP_110712.1|gi|53721727| 2,4-dihydroxyhept-2-ene-1,7-dioic acid aldolase	BPSS0698	Cytoplasmic	9.26
BPSS0699 ref|YP_110713.1|gi|53721728| AraC family transcriptional regulator	BPSS0699	Cytoplasmic	9.26
BPSS0705 ref|YP_110719.1|gi|53721734| response regulator protein	BPSS0705	Cytoplasmic	9.97
BPSS0709 ref|YP_110723.1|gi|53721738| transposase	BPSS0709	Cytoplasmic	8.96
BPSS0710 ref|YP_110724.1|gi|53721739| enoyl-CoA hydratase	BPSS0710	Cytoplasmic	9.26
BPSS0711 ref|YP_110725.1|gi|53721740| alanine racemase	BPSS0711	Cytoplasmic	9.97
BPSS0712 ref|YP_110726.1|gi|53721741| hypothetical protein	BPSS0712	Cytoplasmic	8.96
BPSS0714 ref|YP_110728.1|gi|53721743| hypothetical protein	BPSS0714	Cytoplasmic	8.96
BPSS0716 ref|YP_110730.1|gi|53721745| hypothetical protein	BPSS0716	Cytoplasmic	8.96
BPSS0718 ref|YP_110732.1|gi|53721747| TetR family transcriptional regulator	BPSS0718	Cytoplasmic	9.26
BPSS0720 ref|YP_110734.1|gi|53721749| NADH:flavin oxidoreductase / NADH oxidase	BPSS0720	Cytoplasmic	9.97
BPSS0726 ref|YP_110739.1|gi|53721754| GntR family transcriptional regulator	BPSS0726	Cytoplasmic	9.97
BPSS0727 ref|YP_110740.1|gi|53721755| hypothetical protein	BPSS0727	Cytoplasmic	8.96
BPSS0730 ref|YP_110741.1|gi|53721756| regulatory protein	BPSS0730	Cytoplasmic	9.26
BPSS0731 ref|YP_110742.1|gi|53721757| acyl-CoA synthetase	BPSS0731	Cytoplasmic	9.97
BPSS0738 ref|YP_110749.1|gi|53721764| DNA-binding protein	BPSS0738	Cytoplasmic	8.96
BPSS0741 ref|YP_110753.1|gi|53721768| LysR family transcriptional regulator	BPSS0741	Cytoplasmic	9.26
BPSS0742 ref|YP_110754.1|gi|53721769| beta alanine--pyruvate transaminase	BPSS0742	Cytoplasmic	9.97
BPSS0743 ref|YP_110755.1|gi|53721770| methylmalonate-semialdehyde dehydrogenase	BPSS0743	Cytoplasmic	9.26
BPSS0749 ref|YP_110760.1|gi|53721775| GerE familyregulatory protein	BPSS0749	Cytoplasmic	9.97
BPSS0751 ref|YP_110762.1|gi|53721777| peptidase	BPSS0751	Cytoplasmic	8.96
BPSS0755 ref|YP_110766.1|gi|53721781| LysR family transcriptional regulator	BPSS0755	Cytoplasmic	9.97
BPSS0760 ref|YP_110771.1|gi|53721786| DNA-binding protein	BPSS0760	Cytoplasmic	8.96
BPSS0761 ref|YP_110772.1|gi|53721787| cytosine deaminase	BPSS0761	Cytoplasmic	9.97
BPSS0763 ref|YP_110774.1|gi|53721789| hypothetical protein	BPSS0763	Cytoplasmic	9.97
BPSS0764 ref|YP_110775.1|gi|53721790| short chain dehydrogenase	BPSS0764	Cytoplasmic	9.97
BPSS0765 ref|YP_110776.1|gi|53721791| DNA-binding protein	BPSS0765	Cytoplasmic	9.97
BPSS0770 ref|YP_110782.1|gi|53721797| GerE family regulatory protein	BPSS0770	Cytoplasmic	9.97
BPSS0779 ref|YP_110788.1|gi|53721803| p-hydroxycinnamoyl CoA hydratase/lyase	BPSS0779	Cytoplasmic	9.97
BPSS0785 ref|YP_110794.1|gi|53721809| IclR family transcriptional regulator	BPSS0785	Cytoplasmic	9.97
BPSS0790 ref|YP_110799.1|gi|53721814| hydrolase C-terminus	BPSS0790	Cytoplasmic	8.96
BPSS0791 ref|YP_110800.1|gi|53721815| hypothetical protein	BPSS0791	Cytoplasmic	9.26
BPSS0792 ref|YP_110801.1|gi|53721816| short chain dehydrogenase	BPSS0792	Cytoplasmic	9.97
BPSS0793 ref|YP_110802.1|gi|53721817| fumarylacetoacetate (FAA) hydrolase	BPSS0793	Cytoplasmic	9.97
BPSS0794 ref|YP_110803.1|gi|53721818| short chain dehydrogenase	BPSS0794	Cytoplasmic	9.26
BPSS0797 ref|YP_110807.1|gi|53721822| IclR family transcriptional regulator	BPSS0797	Cytoplasmic	9.26
BPSS0800 ref|YP_110810.1|gi|53721825| TetR family regulatory protein	BPSS0800	Cytoplasmic	9.26
BPSS0806 ref|YP_110816.1|gi|53721831| leucine-responsive regulatory protein	BPSS0806	Cytoplasmic	9.97
BPSS0808 ref|YP_110818.1|gi|53721833| aromatic amino acid aminotransferase	BPSS0808	Cytoplasmic	9.97
BPSS0810 ref|YP_110820.1|gi|53721835| hypothetical protein	BPSS0810	Cytoplasmic	8.96
BPSS0811 ref|YP_110821.1|gi|53721836| hypothetical protein	BPSS0811	Cytoplasmic	8.96
BPSS0812 ref|YP_110822.1|gi|53721837| hypothetical protein	BPSS0812	Cytoplasmic	8.96
BPSS0814 ref|YP_110825.1|gi|53721840| chemotaxis protein	BPSS0814	Cytoplasmic	9.97
BPSS0820 ref|YP_110831.1|gi|53721846| tRNA synthetase	BPSS0820	Cytoplasmic	9.97
BPSS0821 ref|YP_110832.1|gi|53721847| hypothetical protein	BPSS0821	Cytoplasmic	8.96
BPSS0822 ref|YP_110833.1|gi|53721848| hypothetical protein	BPSS0822	Cytoplasmic	8.96
BPSS0824 ref|YP_110835.1|gi|53721850| dioxygenase	BPSS0824	Cytoplasmic	9.26
BPSS0825 ref|YP_110836.1|gi|53721851| hypothetical protein	BPSS0825	Cytoplasmic	8.96
BPSS0826 ref|YP_110837.1|gi|53721852| aminotransferase class-V	BPSS0826	Cytoplasmic	9.97
BPSS0829 ref|YP_110840.1|gi|53721855| monooxygenase	BPSS0829	Cytoplasmic	9.97
BPSS0830 ref|YP_110841.1|gi|53721856| DNA-binding protein	BPSS0830	Cytoplasmic	8.96
BPSS0835 ref|YP_110846.1|gi|53721861| response regulator protein	BPSS0835	Cytoplasmic	9.97
BPSS0836 ref|YP_110847.1|gi|53721862| universal stress protein	BPSS0836	Cytoplasmic	8.96
BPSS0840 ref|YP_110851.1|gi|53721866| zinc-binding dehydrogenase	BPSS0840	Cytoplasmic	9.97
BPSS0843 ref|YP_110854.1|gi|53721869| short chain dehydrogenase	BPSS0843	Cytoplasmic	9.26
BPSS0844 ref|YP_110855.1|gi|53721870| hypothetical protein	BPSS0844	Cytoplasmic	8.96
BPSS0847 ref|YP_110859.1|gi|53721874| hypothetical protein	BPSS0847	Cytoplasmic	9.26
BPSS0849 ref|YP_110861.1|gi|53721876| hypothetical protein	BPSS0849	Cytoplasmic	9.26
BPSS0850 ref|YP_110862.1|gi|53721877| hypothetical protein	BPSS0850	Cytoplasmic	8.96
BPSS0851 ref|YP_110863.1|gi|53721878| nitrilotriacetate monooxygenase component A	BPSS0851	Cytoplasmic	9.26
BPSS0853 ref|YP_110865.1|gi|53721880| ribokinase	BPSS0853	Cytoplasmic	9.97
BPSS0855 ref|YP_110867.1|gi|53721882| hypothetical protein	BPSS0855	Cytoplasmic	8.96
BPSS0856 ref|YP_110868.1|gi|53721883| hypothetical protein	BPSS0856	Cytoplasmic	9.97
BPSS0857 ref|YP_110869.1|gi|53721884| hypothetical protein	BPSS0857	Cytoplasmic	8.96
BPSS0861 ref|YP_110871.1|gi|53721886| LysR family transcriptional regulator	BPSS0861	Cytoplasmic	9.26
BPSS0864 ref|YP_110873.1|gi|53721888| aldo/keto reductase	BPSS0864	Cytoplasmic	9.26
BPSS0865 ref|YP_110874.1|gi|53721889| hypothetical protein	BPSS0865	Cytoplasmic	9.97
BPSS0867 ref|YP_110876.1|gi|53721891| GerE family regulatory protein	BPSS0867	Cytoplasmic	9.26
BPSS0868 ref|YP_110877.1|gi|53721892| phenylacetaldehyde dehydrogenase	BPSS0868	Cytoplasmic	9.97
BPSS0869 ref|YP_110878.1|gi|53721893| hypothetical protein	BPSS0869	Cytoplasmic	9.97
BPSS0872 ref|YP_110881.1|gi|53721896| AraC family transcriptional regulator	BPSS0872	Cytoplasmic	9.97
BPSS0876 ref|YP_110885.1|gi|53721900| GNAT family acetyltransferase	BPSS0876	Cytoplasmic	9.97
BPSS0877 ref|YP_110886.1|gi|53721901| N-ethylmaleimide reductase	BPSS0877	Cytoplasmic	9.26
BPSS0880 ref|YP_110889.1|gi|53721904| transcription elongation factor	BPSS0880	Cytoplasmic	9.97
BPSS0883 ref|YP_110892.1|gi|53721907| GTP cyclohydrolase II	BPSS0883	Cytoplasmic	9.97
BPSS0884 ref|YP_110893.1|gi|53721908| hypothetical protein	BPSS0884	Cytoplasmic	8.96
BPSS0887 ref|YP_110896.1|gi|53721911| N-acylhomoserine lactone dependent regulatory protein	BPSS0887	Cytoplasmic	9.26
BPSS0892 ref|YP_110901.1|gi|53721916| IclR family transcriptional regulator	BPSS0892	Cytoplasmic	9.97
BPSS0894 ref|YP_110903.1|gi|53721918| Rieske (2Fe-2S) domain-containing protein	BPSS0894	Cytoplasmic	8.96
BPSS0896 ref|YP_110905.1|gi|53721920| Rieske (2Fe-2S) domain-containing protein	BPSS0896	Cytoplasmic	8.96
BPSS0897 ref|YP_110906.1|gi|53721921| short chain dehydrogenase	BPSS0897	Cytoplasmic	9.26
BPSS0898 ref|YP_110907.1|gi|53721922| hypothetical protein	BPSS0898	Cytoplasmic	8.96
BPSS0900 ref|YP_110909.1|gi|53721924| IclR family transcriptional regulator	BPSS0900	Cytoplasmic	9.97
BPSS0901 ref|YP_110910.1|gi|53721925| short chain dehydrogenase	BPSS0901	Cytoplasmic	9.26
BPSS0902 ref|YP_110911.1|gi|53721926| hypothetical protein	BPSS0902	Cytoplasmic	9.97
BPSS0903 ref|YP_110912.1|gi|53721927| L-aspartate dehydrogenase	BPSS0903	Cytoplasmic	9.97
BPSS0904 ref|YP_110913.1|gi|53721928| aldehyde dehydrogenase	BPSS0904	Cytoplasmic	9.26
BPSS0905 ref|YP_110914.1|gi|53721929| glyoxalase/bleomycin resistance protein/dioxygenase superfamily protein	BPSS0905	Cytoplasmic	8.96
BPSS0906 ref|YP_110915.1|gi|53721930| pyridine nucleotide-disulfide oxidoreductase	BPSS0906	Cytoplasmic	9.97
BPSS0910 ref|YP_110919.1|gi|53721934| hypothetical protein	BPSS0910	Cytoplasmic	8.96
BPSS0911 ref|YP_110920.1|gi|53721935| amidase	BPSS0911	Cytoplasmic	9.26
BPSS0912 ref|YP_110921.1|gi|53721936| transcription regulator AsnC	BPSS0912	Cytoplasmic	9.26
BPSS0913 ref|YP_110922.1|gi|53721937| methionine gamma-lyase	BPSS0913	Cytoplasmic	9.97
BPSS0916 ref|YP_110925.1|gi|53721940| N-hydroxyarylamine O-acetyltransferase	BPSS0916	Cytoplasmic	9.97
BPSS0917 ref|YP_110926.1|gi|53721941| hypothetical protein	BPSS0917	Cytoplasmic	8.96
BPSS0918 ref|YP_110927.1|gi|53721942| DNA-binding protein	BPSS0918	Cytoplasmic	8.96
BPSS0920 ref|YP_110929.1|gi|53721944| LysR family transcriptional regulator	BPSS0920	Cytoplasmic	9.97
BPSS0924 ref|YP_110933.1|gi|53721948| hypothetical protein	BPSS0924	Cytoplasmic	9.97
BPSS0925 ref|YP_110934.1|gi|53721949| short chain dehydrogenase	BPSS0925	Cytoplasmic	9.26
BPSS0926 ref|YP_110935.1|gi|53721950| flavin-binding monooxygenase-like protein	BPSS0926	Cytoplasmic	9.26
BPSS0929 ref|YP_110938.1|gi|53721953| hypothetical protein	BPSS0929	Cytoplasmic	8.96
BPSS0934 ref|YP_110943.1|gi|53721958| hypothetical protein	BPSS0934	Cytoplasmic	8.96
BPSS0935 ref|YP_110944.1|gi|53721959| hypothetical protein	BPSS0935	Cytoplasmic	8.96
BPSS0936 ref|YP_110945.1|gi|53721960| hypothetical protein	BPSS0936	Cytoplasmic	9.26
BPSS0938 ref|YP_110947.1|gi|53721962| hypothetical protein	BPSS0938	Cytoplasmic	9.97
BPSS0939 ref|YP_110948.1|gi|53721963| carboxymuconolactone decarboxylase	BPSS0939	Cytoplasmic	8.96
BPSS0940 ref|YP_110949.1|gi|53721964| ornithine cyclodeaminase	BPSS0940	Cytoplasmic	9.26
BPSS0944 ref|YP_110953.1|gi|53721968| LysR family transcriptional regulator	BPSS0944	Cytoplasmic	9.97
BPSS0948 ref|YP_110956.1|gi|53721971| LysR family transcriptional regulator	BPSS0948	Cytoplasmic	9.97
BPSS0955 ref|YP_110963.1|gi|53721978| D-alanyl-D-alanine dipeptidase	BPSS0955	Cytoplasmic	9.97
BPSS0956 ref|YP_110964.1|gi|53721979| hypothetical protein	BPSS0956	Cytoplasmic	9.97
BPSS0958 ref|YP_110966.1|gi|53721981| hypothetical protein	BPSS0958	Cytoplasmic	9.26
BPSS0961 ref|YP_110969.1|gi|53721984| hypothetical protein	BPSS0961	Cytoplasmic	8.96
BPSS0969 ref|YP_110977.1|gi|53721992| molybdopterin oxidoreductase	BPSS0969	Cytoplasmic	9.97
BPSS0970 ref|YP_110978.1|gi|53721993| GntR family transcriptional regulator	BPSS0970	Cytoplasmic	9.97
BPSS0984 ref|YP_110992.1|gi|53722007| UDP-N-acetylglucosamine 1-carboxyvinyltransferase	BPSS0984	Cytoplasmic	9.97
BPSS0995 ref|YP_111001.1|gi|53722016| AraC family transcriptional regulator	BPSS0995	Cytoplasmic	8.96
BPSS0996 ref|YP_111002.1|gi|53722017| Rieske iron-sulfur domain-containing protein	BPSS0996	Cytoplasmic	8.96
BPSS0997 ref|YP_111003.1|gi|53722018| hypothetical protein	BPSS0997	Cytoplasmic	8.96
BPSS1000 ref|YP_111006.1|gi|53722021| polyketide biosynthesis enoyl-CoA hydratase	BPSS1000	Cytoplasmic	9.97
BPSS1001 ref|YP_111007.1|gi|53722022| polyketide biosynthesis enoyl-CoA hydratase	BPSS1001	Cytoplasmic	9.97
BPSS1002 ref|YP_111008.1|gi|53722023| hydroxymethylglutaryl-coenzyme A synthase	BPSS1002	Cytoplasmic	8.96
BPSS1004 ref|YP_111010.1|gi|53722025| acyl transferase	BPSS1004	Cytoplasmic	9.26
BPSS1010 ref|YP_111016.1|gi|53722031| halogenase	BPSS1010	Cytoplasmic	8.96
BPSS1013 ref|YP_111019.1|gi|53722034| hypothetical protein	BPSS1013	Cytoplasmic	8.96
BPSS1015 ref|YP_111021.1|gi|53722036| LysR family transcriptional regulator	BPSS1015	Cytoplasmic	9.97
BPSS1019 ref|YP_111025.1|gi|53722040| fumarylpyruvate hydrolase	BPSS1019	Cytoplasmic	9.97
BPSS1020 ref|YP_111026.1|gi|53722041| AraC family transcriptional regulator	BPSS1020	Cytoplasmic	9.97
BPSS1027 ref|YP_111033.1|gi|53722048| RNA polymerase sigma factor	BPSS1027	Cytoplasmic	9.97
BPSS1036 ref|YP_111042.1|gi|53722057| acyl-CoA dehydrogenase	BPSS1036	Cytoplasmic	8.96
BPSS1040 ref|YP_111046.1|gi|53722061| transcriptional activator protein	BPSS1040	Cytoplasmic	9.97
BPSS1046 ref|YP_111052.1|gi|53722067| hypothetical protein	BPSS1046	Cytoplasmic	8.96
BPSS1048 ref|YP_111055.1|gi|53722070| hypothetical protein	BPSS1048	Cytoplasmic	8.96
BPSS1052 ref|YP_111063.1|gi|53722078| bacteriophage replication protein	BPSS1052	Cytoplasmic	8.96
BPSS1063 ref|YP_111074.1|gi|53722089| bacteriophage terminase, ATPase subunit	BPSS1063	Cytoplasmic	8.96
BPSS1065 ref|YP_111076.1|gi|53722091| major capsid protein	BPSS1065	Cytoplasmic	8.96
BPSS1072 ref|YP_111083.1|gi|53722098| bacteriophage-acquired protein	BPSS1072	Cytoplasmic	8.96
BPSS1075 ref|YP_111087.1|gi|53722102| bacteriophage tail completion protein S	BPSS1075	Cytoplasmic	8.96
BPSS1080 ref|YP_111092.1|gi|53722107| bacteriophage baseplate assembly protein J	BPSS1080	Cytoplasmic	8.96
BPSS1081 ref|YP_111093.1|gi|53722108| bacteriophage tail protein I	BPSS1081	Cytoplasmic	9.26
BPSS1085 ref|YP_111097.1|gi|53722112| bacteriophage major tail tube protein	BPSS1085	Cytoplasmic	8.96
BPSS1089 ref|YP_111102.1|gi|53722117| bacteriophage late control gene D protein	BPSS1089	Cytoplasmic	8.96
BPSS1090 ref|YP_111103.1|gi|53722118| alanine dehydrogenase	BPSS1090	Cytoplasmic	9.97
BPSS1091 ref|YP_111104.1|gi|53722119| hypothetical protein	BPSS1091	Cytoplasmic	8.96
BPSS1093 ref|YP_111106.1|gi|53722121| hydratase	BPSS1093	Cytoplasmic	8.96
BPSS1095 ref|YP_111108.1|gi|53722123| heat-shock chaperone protein	BPSS1095	Cytoplasmic	9.97
BPSS1096 ref|YP_111109.1|gi|53722124| chaperone heat-shock protein	BPSS1096	Cytoplasmic	9.97
BPSS1098 ref|YP_111111.1|gi|53722126| hypothetical protein	BPSS1098	Cytoplasmic	8.96
BPSS1102 ref|YP_111115.1|gi|53722130| hypothetical protein	BPSS1102	Cytoplasmic	8.96
BPSS1104 ref|YP_111117.1|gi|53722132| phosphomethylpyrimidine kinase	BPSS1104	Cytoplasmic	8.96
BPSS1105 ref|YP_111118.1|gi|53722133| methyltransferase	BPSS1105	Cytoplasmic	8.96
BPSS1106 ref|YP_111119.1|gi|53722134| thymidylate synthase	BPSS1106	Cytoplasmic	8.96
BPSS1107 ref|YP_111120.1|gi|53722135| hypothetical protein	BPSS1107	Cytoplasmic	8.96
BPSS1108 ref|YP_111121.1|gi|53722136| NUDIX/MutT family protein	BPSS1108	Cytoplasmic	8.96
BPSS1109 ref|YP_111122.1|gi|53722137| methyltransferase	BPSS1109	Cytoplasmic	9.97
[truncated: 3,728 more rows]

## Sheet: BV-BRC Proteome Comparison
Burkholderia pseudomallei K96243															Burkholderia mallei ATCC 23344										Burkholderia cenocepacia strain K56-2										Burkholderia multivorans ATCC 17616										Pseudomonas aeruginosa PA14
ref_genome_contig	ref_genome_gene	ref_genome_aa_length	ref_genome_patric_id	ref_genome_locus_tag	ref_genome_gene_name	ref_genome_plfam_id	ref_genome_pgfam_id	ref_genome_function	ref_genome_start	ref_genome_end	ref_genome_strand	PSORTB	Identified by Schell 2011?	PSORTb Down-Selected Protein?	comp_genome_1_hit	comp_genome_1_contig	comp_genome_1_gene	comp_genome_1_aa_length	comp_genome_1_patric_id	comp_genome_1_locus_tag	comp_genome_1_gene_name	comp_genome_1_function	comp_genome_1_percent_identity	comp_genome_1_seq_coverage	comp_genome_2_hit	comp_genome_2_contig	comp_genome_2_gene	comp_genome_2_aa_length	comp_genome_2_patric_id	comp_genome_2_locus_tag	comp_genome_2_gene_name	comp_genome_2_function	comp_genome_2_percent_identity	comp_genome_2_seq_coverage	comp_genome_3_hit	comp_genome_3_contig	comp_genome_3_gene	comp_genome_3_aa_length	comp_genome_3_patric_id	comp_genome_3_locus_tag	comp_genome_3_gene_name	comp_genome_3_function	comp_genome_3_percent_identity	comp_genome_3_seq_coverage	comp_genome_5_hit	comp_genome_5_contig	comp_genome_5_gene	comp_genome_5_aa_length	comp_genome_5_patric_id
NC_006350	294	262	fig|272560.6.peg.294	BPSL0275	flgG	PLF_32008_00000758	PGF_00005358	Flagellar basal-body rod protein FlgG	286573	287361	+	Extracellular	Y	Y	bi (<->)	NC_006348	3415	262	fig|243160.12.peg.3415	BMA3330	flgG	Flagellar basal-body rod protein FlgG	1	0.996	bi (<->)	LAUA01000017	5276	262	fig|95486.65.peg.5276	WQ49_24030	flgG	Flagellar basal-body rod protein FlgG	0.938	0.989	bi (<->)	NC_010084	3251	262	fig|395019.8.peg.3251	Bmul_3015	flgG	Flagellar basal-body rod protein FlgG	0.95	0.989	bi (<->)	CP104982	4208	261	fig|652611.54.peg.4208
NC_006350	2445	769	fig|272560.6.peg.2445	BPSL2151		PLF_32008_00000105	PGF_07253156	Outer membrane protein assembly factor YaeT	2580221	2582530	-	OuterMembrane	Y	Y	bi (<->)	NC_006348	1591	738	fig|243160.12.peg.1591	BMA1547		Outer membrane protein assembly factor YaeT	0.997	0.999	bi (<->)	LAUA01000017	6392	738	fig|95486.65.peg.6392	WQ49_29295		Outer membrane protein assembly factor YaeT	0.938	0.999	bi (<->)	NC_010084	1447	769	fig|395019.8.peg.1447	Bmul_1265		Outer membrane protein assembly factor YaeT	0.941	0.999	bi (<->)	CP104982	1402	794	fig|652611.54.peg.1402
NC_006350	1083	215	fig|272560.6.peg.1083	BPSL0999		PLF_32008_00002496	PGF_01068391	Outer membrane protein and related peptidoglycan-associated (lipo)proteins	1162474	1163121	-	OuterMembrane	Y	Y	bi (<->)	NC_006348	730	215	fig|243160.12.peg.730	BMA0711		Outer membrane protein and related peptidoglycan-associated (lipo)proteins	1	0.995	bi (<->)	LAUA01000017	5918	215	fig|95486.65.peg.5918	WQ49_27005		Outer membrane protein and related peptidoglycan-associated (lipo)proteins	0.935	0.995	bi (<->)	NC_010084	1015	214	fig|395019.8.peg.1015	Bmul_0858		Outer membrane protein	0.939	0.986	bi (<->)	CP104982	4473	237	fig|652611.54.peg.4473
NC_006350	2430	315	fig|272560.6.peg.2430	BPSL2138		PLF_32008_00000479	PGF_00634936	Protein QmcA (possibly involved in integral membrane quality control)	2565179	2566126	-	Unknown	Y	Y	bi (<->)	NC_006348	1576	315	fig|243160.12.peg.1576	BMA1533		Protein QmcA (possibly involved in integral membrane quality control)	1	0.997	bi (<->)	LAUA01000017	6404	311	fig|95486.65.peg.6404	WQ49_29350		Protein QmcA (possibly involved in integral membrane quality control)	0.923	0.997	bi (<->)	NC_010084	1458	315	fig|395019.8.peg.1458	Bmul_1276		Protein QmcA (possibly involved in integral membrane quality control)	0.948	0.971	uni (->)	CP104982	489	263	fig|652611.54.peg.489
NC_006350	3140	139	fig|272560.6.peg.3140	BPSL2749		PLF_32008_00261775	PGF_09690513	ElaB protein	3291875	3292294	+	Unknown	Y	Y	bi (<->)	NC_006348	2136	100	fig|243160.12.peg.2136	BMA2067		ElaB protein	0.99	0.99	bi (<->)	LAUA01000001	306	100	fig|95486.65.peg.306	WQ49_01420		ElaB protein	0.93	0.99	bi (<->)	NC_010084	2802	100	fig|395019.8.peg.2802	Bmul_2572		ElaB protein	0.95	0.99	bi (<->)	CP104982	2039	109	fig|652611.54.peg.2039
NC_006350	2388	226	fig|272560.6.peg.2388	BPSL2105		PLF_32008_00001258	PGF_01060289	Suppressor of sigma54-dependent transcription, PspA-like	2530906	2531586	+	OuterMembrane		Y	bi (<->)	NC_006348	1542	226	fig|243160.12.peg.1542	BMA1498		Suppressor of sigma54-dependent transcription, PspA-like	0.996	0.996	bi (<->)	LAUA01000017	6458	226	fig|95486.65.peg.6458	WQ49_29600		Suppressor of sigma54-dependent transcription, PspA-like	0.929	0.996	bi (<->)	NC_010084	1506	226	fig|395019.8.peg.1506	Bmul_1320		Suppressor of sigma54-dependent transcription, PspA-like	0.916	0.996
NC_006350	3415	157	fig|272560.6.peg.3415	BPSL2989		PLF_32008_00021015	PGF_08346382	Outer membrane lipoprotein	3562407	3562880	+	OuterMembrane	Y	Y	bi (<->)	NC_006348	2585	157	fig|243160.12.peg.2585	BMA2507		Outer membrane lipoprotein	1	0.994	bi (<->)	LAUA01000001	54	157	fig|95486.65.peg.54	WQ49_00280		Outer membrane lipoprotein	0.904	0.994	bi (<->)	NC_010084	3023	157	fig|395019.8.peg.3023	Bmul_2785		Outer membrane lipoprotein	0.917	0.994	bi (<->)	CP104982	4238	154	fig|652611.54.peg.4238
NC_006350	2873	224	fig|272560.6.peg.2873	BPSL2522	ompA	PLF_32008_00000336	PGF_08447327	Outer membrane protein A precursor	3039644	3040318	+	OuterMembrane	Y	Y	bi (<->)	NC_006348	443	181	fig|243160.12.peg.443	BMA0436		Outer membrane protein A precursor	0.994	0.994	bi (<->)	LAUA01000017	7637	222	fig|95486.65.peg.7637	WQ49_35110		Outer membrane protein A precursor	0.906	0.991	bi (<->)	NC_010084	2494	222	fig|395019.8.peg.2494	Bmul_2265		Outer membrane protein A precursor	0.915	0.995	uni (->)	CP104982	1358	261	fig|652611.54.peg.1358
NC_006350	1722	280	fig|272560.6.peg.1722	BPSL1531		PLF_32008_00000665	PGF_05872952	Outer membrane beta-barrel assembly protein BamD	1773584	1774426	-	OuterMembrane	Y	Y	bi (<->)	NC_006348	1362	274	fig|243160.12.peg.1362	BMA1325	comL	Outer membrane beta-barrel assembly protein BamD	0.989	0.996	bi (<->)	LAUA01000017	6621	274	fig|95486.65.peg.6621	WQ49_30395		Outer membrane beta-barrel assembly protein BamD	0.898	0.996	bi (<->)	NC_010084	1681	274	fig|395019.8.peg.1681	Bmul_1480		Outer membrane beta-barrel assembly protein BamD	0.909	0.996	bi (<->)	CP104982	5053	341	fig|652611.54.peg.5053
NC_006350	3704	276	fig|272560.6.peg.3704	BPSL3249		PLF_32008_00001860	PGF_00027212	Outer membrane protein W precursor	3861407	3862237	+	OuterMembrane		Y	bi (<->)	NC_006348	2665	276	fig|243160.12.peg.2665	BMA2593		Outer membrane protein W precursor	1	0.996	bi (<->)	LAUA01000007	3028	277	fig|95486.65.peg.3028	WQ49_13815		Outer membrane protein W precursor	0.881	0.996	bi (<->)	NC_010084	340	277	fig|395019.8.peg.340	Bmul_0214		Outer membrane protein W precursor	0.894	0.917	uni (->)	CP104982	922	232	fig|652611.54.peg.922
NC_006350	295	240	fig|272560.6.peg.295	BPSL0276	flgH	PLF_32008_00001312	PGF_08607235	Flagellar L-ring protein FlgH	287382	288104	+	Unknown	Y	Y	bi (<->)	NC_006348	3416	222	fig|243160.12.peg.3416	BMA3331	flgH	Flagellar L-ring protein FlgH	1	0.991	bi (<->)	LAUA01000017	5277	229	fig|95486.65.peg.5277	WQ49_24035		Flagellar L-ring protein FlgH	0.916	0.878	bi (<->)	NC_010084	3250	229	fig|395019.8.peg.3250	Bmul_3014	flgH	Flagellar L-ring protein FlgH	0.858	0.996	bi (<->)	CP104982	4207	231	fig|652611.54.peg.4207
NC_006350	1662	85	fig|272560.6.peg.1662	BPSL1480	moaD	PLF_32008_00001218	PGF_00022566	Molybdopterin synthase sulfur carrier subunit	1718249	1718506	+	Unknown	Y	Y	bi (<->)	NC_006348	1421	85	fig|243160.12.peg.1421	BMA1381	moaD	Molybdopterin synthase sulfur carrier subunit	1	0.988	bi (<->)	LAUA01000017	6562	85	fig|95486.65.peg.6562	WQ49_30110		Molybdopterin synthase sulfur carrier subunit	0.882	0.988	bi (<->)	NC_010084	1618	85	fig|395019.8.peg.1618	Bmul_1422		Molybdopterin synthase sulfur carrier subunit	0.882	0.988	bi (<->)	CP104982	1080	83	fig|652611.54.peg.1080
NC_006350	3477	425	fig|272560.6.peg.3477	BPSL3046		PLF_32008_00000403	PGF_00020168	Membrane-bound lytic murein transglycosylase A	3636374	3637651	-	OuterMembrane		Y	bi (<->)	NC_006349	4047	425	fig|243160.12.peg.4047	BMAA0538		Membrane-bound lytic murein transglycosylase A	1	0.998	bi (<->)	LAUA01000004	2542	374	fig|95486.65.peg.2542	WQ49_11530		Membrane-bound lytic murein transglycosylase A	0.888	0.904	bi (<->)	NC_010084	3087	384	fig|395019.8.peg.3087	Bmul_2856		Membrane-bound lytic murein transglycosylase A	0.859	0.997	bi (<->)	CP104982	4048	385	fig|652611.54.peg.4048
NC_006350	3157	421	fig|272560.6.peg.3157	BPSL2764	tolB	PLF_32008_00000374	PGF_10535181	Tol-Pal system beta propeller repeat protein TolB	3302414	3303679	+	Unknown	Y	Y	bi (<->)	NC_006348	2153	406	fig|243160.12.peg.2153	BMA2081	tolB	Tol-Pal system beta propeller repeat protein TolB	0.995	0.998	bi (<->)	LAUA01000001	294	431	fig|95486.65.peg.294	WQ49_01365		Tol-Pal system beta propeller repeat protein TolB	0.869	0.97	bi (<->)	NC_010084	2818	419	fig|395019.8.peg.2818	Bmul_2587	tolB	Tol-Pal system beta propeller repeat protein TolB	0.881	0.998	bi (<->)	CP104982	4326	432	fig|652611.54.peg.4326
NC_006351	4275	510	fig|272560.6.peg.4275	BPSS0294		PLF_32008_00183614	PGF_06982509	Efflux transport system, outer membrane factor (OMF) lipoprotein	395439	396971	+	OuterMembrane	Y	Y	bi (<->)	NC_006349	5037	510	fig|243160.12.peg.5037	BMAA1464		Efflux transport system, outer membrane factor (OMF) lipoprotein	0.994	0.998	bi (<->)	LAUA01000016	5038	513	fig|95486.65.peg.5038	WQ49_22930		Efflux transport system, outer membrane factor (OMF) lipoprotein	0.854	0.998	bi (<->)	NC_010086	3641	517	fig|395019.8.peg.3641	Bmul_3375		Efflux transport system, outer membrane factor (OMF) lipoprotein	0.884	0.95	uni (->)	CP104982	2659	498	fig|652611.54.peg.2659
NC_006351	5050	384	fig|272560.6.peg.5050	BPSS0943		PLF_32008_00011785	PGF_03696773	Outer membrane porin	1243885	1245039	+	OuterMembrane	Y	Y	bi (<->)	NC_006349	4843	384	fig|243160.12.peg.4843	BMAA1286		Outer membrane porin	1	0.997	bi (<->)	LAUA01000002	1019	384	fig|95486.65.peg.1019	WQ49_04655		Outer membrane porin	0.878	0.997	bi (<->)	NC_010086	4328	384	fig|395019.8.peg.4328	Bmul_4039		Outer membrane porin	0.846	0.997
NC_006351	5097	371	fig|272560.6.peg.5097	BPSS0979		PLF_32008_00002705	PGF_01034714	Outer membrane porin OmpC	1297191	1298306	+	OuterMembrane	Y	Y	bi (<->)	NC_006349	4797	371	fig|243160.12.peg.4797	BMAA1242		Outer membrane porin OmpC	0.997	0.997	bi (<->)	LAUA01000002	951	367	fig|95486.65.peg.951	WQ49_04365		Outer membrane porin	0.862	0.943	bi (<->)	NC_010086	4392	367	fig|395019.8.peg.4392	Bmul_4097		Outer membrane porin protein 32 precursor	0.862	0.943
NC_006350	3793	225	fig|272560.6.peg.3793	BPSL3336		PLF_32008_00002201	PGF_10475817	putative lipoprotein	3955731	3956408	-	Unknown	Y	Y	bi (<->)	NC_006348	2963	301	fig|243160.12.peg.2963	BMA2891		putative lipoprotein	0.991	0.744	bi (<->)	LAUA01000017	5295	225	fig|95486.65.peg.5295	WQ49_24110		putative lipoprotein	0.874	0.911	bi (<->)	NC_010084	3232	225	fig|395019.8.peg.3232	Bmul_2999		putative lipoprotein	0.855	0.969	bi (<->)	CP104982	51	228	fig|652611.54.peg.51
NC_006351	4582	383	fig|272560.6.peg.4582	BPSS0562		PLF_32008_00000366	PGF_01066441	Outer membrane porin OmpC	766994	768145	+	OuterMembrane	Y	Y	bi (<->)	NC_006349	3992	372	fig|243160.12.peg.3992	BMAA0486		Outer membrane porin OmpC	1	0.997	bi (<->)	LAUA01000002	1588	379	fig|95486.65.peg.1588	WQ49_07225		Outer membrane porin OmpC	0.856	0.95	bi (<->)	NC_010086	3851	379	fig|395019.8.peg.3851	Bmul_3572		Outer membrane porin OmpC	0.861	0.95
NC_006351	5273	553	fig|272560.6.peg.5273	BPSS1120		PLF_32008_00156939	PGF_06982509	Efflux transport system, outer membrane factor (OMF) lipoprotein	1504001	1505662	+	OuterMembrane	Y	Y	bi (<->)	NC_006349	4577	553	fig|243160.12.peg.4577	BMAA1046		Efflux transport system, outer membrane factor (OMF) lipoprotein	0.993	0.998	uni (->)	LAUA01000017	5733	507	fig|95486.65.peg.5733	WQ49_26130		Efflux transport system, outer membrane factor (OMF) lipoprotein	0.86	0.955	uni (->)	NC_010084	836	507	fig|395019.8.peg.836	Bmul_0690		Efflux transport system, outer membrane factor (OMF) lipoprotein	0.864	0.955	bi (<->)	CP104982	463	485	fig|652611.54.peg.463
NC_006350	881	514	fig|272560.6.peg.881	BPSL0816	oprB	PLF_32008_00156939	PGF_06982509	Efflux transport system, outer membrane factor (OMF) lipoprotein	947371	948915	+	OuterMembrane	Y	Y	bi (<->)	NC_006348	315	508	fig|243160.12.peg.315	BMA0317		Efflux transport system, outer membrane factor (OMF) lipoprotein	0.99	0.998	bi (<->)	LAUA01000017	5733	507	fig|95486.65.peg.5733	WQ49_26130		Efflux transport system, outer membrane factor (OMF) lipoprotein	0.858	0.97	bi (<->)	NC_010084	836	507	fig|395019.8.peg.836	Bmul_0690		Efflux transport system, outer membrane factor (OMF) lipoprotein	0.866	0.97	uni (->)	CP104982	463	485	fig|652611.54.peg.463
NC_006350	2159	498	fig|272560.6.peg.2159	BPSL1913		PLF_32008_00000097	PGF_03005053	Outer membrane factor (OMF) lipoprotein associated wth EmrAB-OMF efflux system	2279266	2280762	+	OuterMembrane	Y	Y	bi (<->)	NC_006348	1092	498	fig|243160.12.peg.1092	BMA1056		Outer membrane factor (OMF) lipoprotein associated wth EmrAB-OMF efflux system	0.996	0.998	bi (<->)	LAUA01000017	7013	510	fig|95486.65.peg.7013	WQ49_32210		Outer membrane factor (OMF) lipoprotein associated wth EmrAB-OMF efflux system	0.851	0.975	bi (<->)	NC_010084	1964	498	fig|395019.8.peg.1964	Bmul_1750		Outer membrane factor (OMF) lipoprotein associated wth EmrAB-OMF efflux system	0.865	0.982	bi (<->)	CP104982	5704	492	fig|652611.54.peg.5704
NC_006351	6056	749	fig|272560.6.peg.6056	BPSS1742		PLF_32008_00004029	PGF_10340087	TonB-dependent copper receptor	2391608	2393857	-	OuterMembrane	Y	Y	bi (<->)	NC_006349	3925	745	fig|243160.12.peg.3925	BMAA0427		TonB-dependent copper receptor	0.981	0.999	bi (<->)	LAUA01000016	3687	688	fig|95486.65.peg.3687	WQ49_16755		Outer membrane receptor proteins, mostly Fe transport	0.862	0.945	bi (<->)	NC_010086	5016	691	fig|395019.8.peg.5016	Bmul_4669		Outer membrane receptor proteins, mostly Fe transport	0.866	0.946	bi (<->)	CP104982	1222	719	fig|652611.54.peg.1222
NC_006351	4751	363	fig|272560.6.peg.4751	BPSS0701		PLF_32008_00002173	PGF_00426619	FIG005478: Porin, Gram-negative type	941677	942768	-	OuterMembrane		Y	bi (<->)	NC_006349	4669	363	fig|243160.12.peg.4669	BMAA1131		FIG005478: Porin, Gram-negative type	0.997	0.997	bi (<->)	LAUA01000014	3218	363	fig|95486.65.peg.3218	WQ49_14625		FIG005478: Porin, Gram-negative type	0.859	0.915	bi (<->)	NC_010086	4686	360	fig|395019.8.peg.4686	Bmul_4363		FIG005478: Porin, Gram-negative type	0.853	0.922
NC_006350	3158	170	fig|272560.6.peg.3158	BPSL2765		PLF_32008_00000086	PGF_00057028	Tol-Pal system peptidoglycan-associated lipoprotein PAL	3303697	3304209	+	OuterMembrane	Y	Y	bi (<->)	NC_006348	2154	170	fig|243160.12.peg.2154	BMA2082		Tol-Pal system peptidoglycan-associated lipoprotein PAL	1	0.994	bi (<->)	LAUA01000001	293	170	fig|95486.65.peg.293	WQ49_01360		Tol-Pal system peptidoglycan-associated lipoprotein PAL	0.841	0.994	bi (<->)	NC_010084	2819	169	fig|395019.8.peg.2819	Bmul_2588		Tol-Pal system peptidoglycan-associated lipoprotein PAL	0.865	0.994	bi (<->)	CP104982	4325	168	fig|652611.54.peg.4325
NC_006351	6760	390	fig|272560.6.peg.6760	BPSS2306		PLF_32008_00039130	PGF_03696773	Outer membrane porin	3106526	3107698	-	OuterMembrane		Y	bi (<->)	NC_006349	5683	430	fig|243160.12.peg.5683	BMAA2059		Outer membrane porin	0.997	0.905	bi (<->)	LAUA01000003	2427	390	fig|95486.65.peg.2427	WQ49_10985		Outer membrane porin	0.813	0.997	bi (<->)	NC_010087	6403	390	fig|395019.8.peg.6403	Bmul_6078		Outer membrane porin	0.844	0.949
NC_006351	6541	480	fig|272560.6.peg.6541	BPSS2136		PLF_32008_00002247	PGF_12881590	Outer membrane low permeability porin, OprD family	2892881	2894323	-	OuterMembrane	Y	Y	bi (<->)	NC_006349	3848	480	fig|243160.12.peg.3848	BMAA0356		Outer membrane low permeability porin, OprD family	1	0.998	bi (<->)	LAUA01000016	4845	488	fig|95486.65.peg.4845	WQ49_22070		Outer membrane low permeability porin, OprD family	0.825	0.982	bi (<->)	NC_010086	3525	491	fig|395019.8.peg.3525	Bmul_3268		Outer membrane low permeability porin, OprD family	0.819	0.982	bi (<->)	CP104982	4890	483	fig|652611.54.peg.4890
NC_006350	1077	605	fig|272560.6.peg.1077	BPSL0994		PLF_32008_00001330	PGF_07516252	Outer membrane component of TAM transport system	1151442	1153259	+	OuterMembrane	Y	Y	bi (<->)	NC_006348	725	605	fig|243160.12.peg.725	BMA0705		Outer membrane component of TAM transport system	0.993	0.998	bi (<->)	LAUA01000017	5914	604	fig|95486.65.peg.5914	WQ49_26990		Outer membrane component of TAM transport system	0.843	0.929	bi (<->)	NC_010084	1011	605	fig|395019.8.peg.1011	Bmul_0855		Outer membrane component of TAM transport system	0.8	0.998	bi (<->)	CP104982	2640	579	fig|652611.54.peg.2640
NC_006350	7	757	fig|272560.6.peg.7	BPSL0007	gspD	PLF_32008_00000395	PGF_09198321	General secretion pathway protein D	8395	10668	+	OuterMembrane	Y	Y	bi (<->)	NC_006348	2856	757	fig|243160.12.peg.2856	BMA2786	gspD	General secretion pathway protein D	0.996	0.999	bi (<->)	LAUA01000007	2810	777	fig|95486.65.peg.2810	WQ49_12820		General secretion pathway protein D	0.812	0.969	bi (<->)	NC_010084	175	768	fig|395019.8.peg.175	Bmul_0063		General secretion pathway protein D	0.824	0.952	bi (<->)	CP104982	4644	803	fig|652611.54.peg.4644
NC_006350	42	386	fig|272560.6.peg.42	BPSL0041		PLF_32008_00002636	PGF_08222750	FIG005478: Porin, Gram-negative type	40533	41693	+	OuterMembrane		Y	bi (<->)	NC_006348	2744	386	fig|243160.12.peg.2744	BMA2675		FIG005478: Porin, Gram-negative type	1	0.997	bi (<->)	LAUA01000007	2778	434	fig|95486.65.peg.2778	WQ49_12660		Outer membrane porin protein 32 precursor	0.805	0.873	bi (<->)	NC_010084	141	377	fig|395019.8.peg.141	Bmul_0031		FIG005478: Porin, Gram-negative type	0.817	0.997
NC_006350	1745	194	fig|272560.6.peg.1745	BPSL1552		PLF_32008_00001625	PGF_00027212	Outer membrane protein W precursor	1801437	1802021	+	OuterMembrane	Y	Y	bi (<->)	NC_006348	1337	194	fig|243160.12.peg.1337	BMA1304		Outer membrane protein W precursor	1	0.995	bi (<->)	LAUA01000017	6661	212	fig|95486.65.peg.6661	WQ49_30585		Outer membrane protein W precursor	0.819	0.906	bi (<->)	NC_010084	1709	216	fig|395019.8.peg.1709	Bmul_1507		Outer membrane protein W precursor	0.798	0.889	bi (<->)	CP104982	922	232	fig|652611.54.peg.922
NC_006350	3468	436	fig|272560.6.peg.3468	BPSL3036		PLF_32008_00024352	PGF_03696773	Outer membrane porin	3617721	3619031	+	OuterMembrane	Y	Y	bi (<->)	NC_006348	2639	386	fig|243160.12.peg.2639	BMA2562		Outer membrane porin	1	0.997	bi (<->)	LAUA01000001	4	383	fig|95486.65.peg.4	WQ49_00030		Outer membrane porin	0.811	0.997	bi (<->)	NC_010084	3078	389	fig|395019.8.peg.3078	Bmul_2847		Outer membrane porin	0.805	0.997
NC_006350	19	551	fig|272560.6.peg.19	BPSL0019		PLF_32008_00001886	PGF_06628331	Outer membrane factor (OMF) lipoprotein associated wth MdtABC efflux system	20480	22135	-	OuterMembrane	Y	Y	bi (<->)	NC_006348	2844	538	fig|243160.12.peg.2844	BMA2773		Outer membrane factor (OMF) lipoprotein associated wth MdtABC efflux system	0.971	0.996	bi (<->)	LAUA01000007	2798	523	fig|95486.65.peg.2798	WQ49_12760		Outer membrane factor (OMF) lipoprotein associated wth MdtABC efflux system	0.808	0.994	bi (<->)	NC_010084	163	527	fig|395019.8.peg.163	Bmul_0051		Outer membrane factor (OMF) lipoprotein associated wth MdtABC efflux system	0.832	0.937	bi (<->)	CP104982	2659	498	fig|652611.54.peg.2659
NC_006351	4231	382	fig|272560.6.peg.4231	BPSS0265		PLF_32008_00271121	PGF_03696773	Outer membrane porin	351601	352749	-	OuterMembrane	Y	Y	bi (<->)	NC_006349	5078	213	fig|243160.12.peg.5078	BMAA1502		Outer membrane porin	0.995	0.995	bi (<->)	LAUA01000016	4961	383	fig|95486.65.peg.4961	WQ49_22570		Outer membrane porin	0.803	0.997	bi (<->)	NC_010086	3607	386	fig|395019.8.peg.3607	Bmul_3342		Outer membrane porin	0.813	0.997
NC_006351	6096	132	fig|272560.6.peg.6096	BPSS1778		PLF_32008_00012331	PGF_01066746	hypothetical protein	2438111	2438509	+	Unknown	Y	Y	bi (<->)	NC_006349	3809	132	fig|243160.12.peg.3809	BMAA0308		hypothetical protein	1	0.992	bi (<->)	LAUA01000016	3742	131	fig|95486.65.peg.3742	WQ49_17000		hypothetical protein	0.856	0.786	bi (<->)	NC_010086	5191	131	fig|395019.8.peg.5191	Bmul_4877		hypothetical protein	0.75	0.992
NC_006350	717	787	fig|272560.6.peg.717	BPSL0658		PLF_32008_00001915	PGF_09964285	LPS-assembly protein LptD @ Organic solvent tolerance protein precursor	747333	749696	+	OuterMembrane	Y	Y	bi (<->)	NC_006348	208	761	fig|243160.12.peg.208	BMA0208		LPS-assembly protein LptD @ Organic solvent tolerance protein precursor	0.999	0.999	bi (<->)	LAUA01000017	5626	786	fig|95486.65.peg.5626	WQ49_25635		LPS-assembly protein LptD @ Organic solvent tolerance protein precursor	0.802	0.999	bi (<->)	NC_010084	731	786	fig|395019.8.peg.731	Bmul_0588		LPS-assembly protein LptD @ Organic solvent tolerance protein precursor	0.789	0.999	bi (<->)	CP104982	637	924	fig|652611.54.peg.637
NC_006350	2923	379	fig|272560.6.peg.2923	BPSL2559		PLF_32008_00040053	PGF_03696773	Outer membrane porin	3087604	3088743	+	OuterMembrane	Y	Y	bi (<->)	NC_006348	2159	379	fig|243160.12.peg.2159	BMA2089		Outer membrane porin	1	0.997	bi (<->)	LAUA01000001	508	383	fig|95486.65.peg.508	WQ49_02385		Outer membrane porin	0.836	0.997	bi (<->)	NC_010084	2613	402	fig|395019.8.peg.2613	Bmul_2395		Outer membrane porin	0.743	0.94
NC_006350	1765	403	fig|272560.6.peg.1765	BPSL1568		PLF_32008_00003064	PGF_00020227	Membrane-fusion protein	1822892	1824103	-	Unknown	Y	Y	bi (<->)	NC_006348	989	371	fig|243160.12.peg.989	BMA0954		Membrane-fusion protein	0.995	0.997	bi (<->)	LAUA01000017	6682	394	fig|95486.65.peg.6682	WQ49_30680		Efflux transporter, RND family, MFP subunit, AcrA/E family	0.791	0.942	bi (<->)	NC_010084	1722	370	fig|395019.8.peg.1722	Bmul_1520		CzcABC family efflux RND transporter, membrane fusion protein	0.79	0.997	bi (<->)	CP104982	1373	367	fig|652611.54.peg.1373
NC_006350	2889	442	fig|272560.6.peg.2889	BPSL2535		PLF_32008_00000767	PGF_10294766	Glutamine amidotransferase, class I	3056494	3057822	-	Unknown	Y	Y	bi (<->)	NC_006348	463	444	fig|243160.12.peg.463	BMA0455		Glutamine amidotransferase, class I	0.971	0.998	bi (<->)	LAUA01000001	534	396	fig|95486.65.peg.534	WQ49_02515		Glutamine amidotransferase, class I	0.738	0.99	bi (<->)	NC_010084	2586	374	fig|395019.8.peg.2586	Bmul_2371		Glutamine amidotransferase, class I	0.866	0.939	uni (->)	CP104982	326	250	fig|652611.54.peg.326
NC_006350	1938	407	fig|272560.6.peg.1938	BPSL1728		PLF_32008_00003294	PGF_00461601	Outer membrane porin protein 32 precursor	2036054	2037277	-	OuterMembrane		Y	bi (<->)	NC_006348	1158	407	fig|243160.12.peg.1158	BMA1125		Outer membrane porin protein 32 precursor	0.995	0.998	bi (<->)	LAUA01000002	734	398	fig|95486.65.peg.734	WQ49_03415		Outer membrane porin	0.788	0.982	bi (<->)	NC_010086	4517	418	fig|395019.8.peg.4517	Bmul_4204		Outer membrane porin protein 32 precursor	0.79	0.943
NC_006350	3792	142	fig|272560.6.peg.3792	BPSL3335		PLF_32008_00002418	PGF_08207033	putative lipoprotein	3955243	3955671	-	Unknown	Y	Y	bi (<->)	NC_006348	2962	142	fig|243160.12.peg.2962			putative lipoprotein	1	0.993	bi (<->)	LAUA01000017	5296	143	fig|95486.65.peg.5296	WQ49_24115		putative lipoprotein	0.78	0.629	bi (<->)	NC_010084	3231	123	fig|395019.8.peg.3231	Bmul_2998		putative lipoprotein	0.791	0.732	bi (<->)	CP104982	52	117	fig|652611.54.peg.52
NC_006350	292	404	fig|272560.6.peg.292	BPSL0273	flgE	PLF_32008_00000158	PGF_00005450	Flagellar hook protein FlgE	284537	285751	+	Extracellular	Y	Y	bi (<->)	NC_006348	3413	413	fig|243160.12.peg.3413	BMA3328	flgE	Flagellar hook protein FlgE	0.998	0.976	bi (<->)	LAUA01000016	3645	414	fig|95486.65.peg.3645	WQ49_16550	flgE	Flagellar hook protein FlgE	0.768	0.973	bi (<->)	NC_010084	3253	414	fig|395019.8.peg.3253	Bmul_3017	flgE	Flagellar hook protein FlgE	0.791	0.976	bi (<->)	CP104982	4210	462	fig|652611.54.peg.4210
NC_006350	2147	551	fig|272560.6.peg.2147	BPSL1903		PLF_32008_00126127	PGF_10363930	Probable activation/secretion signal peptide protein	2264407	2266062	+	OuterMembrane	Y	Y	bi (<->)	NC_006348	1081	551	fig|243160.12.peg.1081	BMA1044		Probable activation/secretion signal peptide protein	0.998	0.998	bi (<->)	LAUA01000017	7004	561	fig|95486.65.peg.7004	WQ49_32165		Probable activation/secretion signal peptide protein	0.768	0.954	bi (<->)	NC_010084	1953	561	fig|395019.8.peg.1953	Bmul_1739		Probable activation/secretion signal peptide protein	0.78	0.954	bi (<->)	CP104982	5141	568	fig|652611.54.peg.5141
NC_006351	4185	1319	fig|272560.6.peg.4185	BPSS0227		PLF_32008_00305258	PGF_08225224	hypothetical protein	307527	311486	+	OuterMembrane		Y	bi (<->)	NC_006349	5452	1307	fig|243160.12.peg.5452	BMAA1845		hypothetical protein	0.98	0.999	bi (<->)	LAUA01000016	4898	1274	fig|95486.65.peg.4898	WQ49_22290		hypothetical protein	0.717	0.996											bi (<->)	CP104982	5261	1088	fig|652611.54.peg.5261
NC_006350	1117	363	fig|272560.6.peg.1117	BPSL1029		PLF_32008_00019820	PGF_01034714	Outer membrane porin OmpC	1198437	1199528	-	OuterMembrane	Y	Y	bi (<->)	NC_006348	762	358	fig|243160.12.peg.762	BMA0743		Outer membrane porin OmpC	1	0.997	bi (<->)	LAUA01000017	5949	358	fig|95486.65.peg.5949	WQ49_27155		Outer membrane porin OmpC	0.768	0.997	bi (<->)	NC_010084	1038	361	fig|395019.8.peg.1038	Bmul_0880		Outer membrane porin	0.777	0.997
NC_006350	866	379	fig|272560.6.peg.866	BPSL0803		PLF_32008_00000118	PGF_04713687	Phospholipase/lecithinase/hemolysin	931480	932619	-	Extracellular	Y	Y	bi (<->)	NC_006348	301	379	fig|243160.12.peg.301	BMA0304		Phospholipase/lecithinase/hemolysin	0.995	0.997	bi (<->)	LAUA01000017	5719	378	fig|95486.65.peg.5719	WQ49_26060		Phospholipase/lecithinase/hemolysin	0.784	0.997	bi (<->)	NC_010084	823	389	fig|395019.8.peg.823	Bmul_0677		Phospholipase/lecithinase/hemolysin	0.765	0.961	uni (->)	CP104982	5656	646	fig|652611.54.peg.5656
NC_006350	3551	310	fig|272560.6.peg.3551	BPSL3099		PLF_32008_00002624	PGF_01097982	T6SS peptidoglycan-binding component TagN	3702074	3703006	+	OuterMembrane		Y	bi (<->)	NC_006348	2897	310	fig|243160.12.peg.2897	BMA2828		T6SS peptidoglycan-binding component TagN	0.987	0.997	bi (<->)	LAUA01000004	2598	316	fig|95486.65.peg.2598	WQ49_11790		T6SS peptidoglycan-binding component TagN	0.794	0.899	bi (<->)	NC_010084	3142	316	fig|395019.8.peg.3142	Bmul_2909		T6SS peptidoglycan-binding component TagN	0.761	0.975	uni (->)	CP104982	4473	237	fig|652611.54.peg.4473
NC_006350	1565	355	fig|272560.6.peg.1565	BPSL1397		PLF_32008_00003595	PGF_03696773	Outer membrane porin	1624054	1625121	-	OuterMembrane		Y	bi (<->)	NC_006348	1514	355	fig|243160.12.peg.1514	BMA1473		Outer membrane porin	0.997	0.997	bi (<->)	LAUA01000017	6479	348	fig|95486.65.peg.6479	WQ49_29705		Outer membrane porin	0.783	0.925	bi (<->)	NC_010084	1530	347	fig|395019.8.peg.1530	Bmul_1343		Outer membrane porin protein 32 precursor	0.762	0.928
NC_006351	4971	400	fig|272560.6.peg.4971	BPSS0873		PLF_32008_00002860	PGF_00461601	Outer membrane porin protein 32 precursor	1166507	1167709	+	OuterMembrane		Y	bi (<->)	NC_006349	4921	400	fig|243160.12.peg.4921	BMAA1360		Outer membrane porin protein 32 precursor	0.99	0.998	bi (<->)	LAUA01000002	1212	402	fig|95486.65.peg.1212	WQ49_05530		Outer membrane porin protein 32 precursor	0.758	0.985	bi (<->)	NC_010086	4121	401	fig|395019.8.peg.4121	Bmul_3825		Outer membrane porin protein 32 precursor	0.79	0.935
NC_006350	2915	778	fig|272560.6.peg.2915	BPSL2553		PLF_32008_00002957	PGF_00683313	TonB-dependent receptor	3080543	3082879	-	OuterMembrane	Y	Y	bi (<->)	NC_006348	489	778	fig|243160.12.peg.489	BMA0477		TonB-dependent receptor	0.996	0.999	bi (<->)	LAUA01000001	515	787	fig|95486.65.peg.515	WQ49_02420		Outer membrane receptor proteins, mostly Fe transport	0.773	0.999	bi (<->)	NC_010084	2606	788	fig|395019.8.peg.2606	Bmul_2388		TonB-dependent receptor	0.763	0.999	uni (->)	CP104982	3299	653	fig|652611.54.peg.3299
NC_006350	1550	233	fig|272560.6.peg.1550	BPSL1381		PLF_32008_00002983	PGF_10363383	Murein hydrolase activator NlpD	1610849	1611550	-	OuterMembrane		Y	bi (<->)	NC_006348	829	233	fig|243160.12.peg.829	BMA0803		Murein hydrolase activator NlpD	1	0.996	bi (<->)	LAUA01000017	7246	230	fig|95486.65.peg.7246	WQ49_33305		Membrane proteins related to metalloendopeptidases	0.747	0.996	bi (<->)	NC_010084	2202	230	fig|395019.8.peg.2202	Bmul_1990		Murein hydrolase activator NlpD	0.785	0.996	uni (->)	CP104982	1427	297	fig|652611.54.peg.1427
NC_006350	3773	450	fig|272560.6.peg.3773	BPSL3319	fliC	PLF_32008_00024394	PGF_10485324	Flagellin FliC	3937489	3938841	+	Extracellular	Y	Y	bi (<->)	NC_006348	2943	388	fig|243160.12.peg.2943	BMA2873	fliC	Flagellin FliC	1	0.997	bi (<->)	LAUA01000007	2941	384	fig|95486.65.peg.2941	WQ49_13420		Flagellin FliC	0.749	0.997	bi (<->)	NC_010084	272	516	fig|395019.8.peg.272	Bmul_0151		Flagellin FliC	0.782	0.479	bi (<->)	CP104982	4198	488	fig|652611.54.peg.4198
NC_006351	6181	681	fig|272560.6.peg.6181	BPSS1850		PLF_32008_00002122	PGF_00067569	Zinc-regulated outer membrane receptor	2512421	2514466	-	OuterMembrane		Y	bi (<->)	NC_006349	3755	681	fig|243160.12.peg.3755	BMAA0251		Zinc-regulated outer membrane receptor	0.999	0.999	bi (<->)	LAUA01000002	762	694	fig|95486.65.peg.762	WQ49_03535		Zinc-regulated outer membrane receptor	0.768	0.978	bi (<->)	NC_010086	4498	677	fig|395019.8.peg.4498	Bmul_4185		Zinc-regulated outer membrane receptor	0.763	0.994	bi (<->)	CP104982	4534	687	fig|652611.54.peg.4534
NC_006350	311	403	fig|272560.6.peg.311	BPSL0289		PLF_32008_00003144	PGF_00461601	Outer membrane porin protein 32 precursor	301001	302212	+	OuterMembrane	Y	Y	bi (<->)	NC_006348	3431	363	fig|243160.12.peg.3431	BMA3345		Outer membrane porin protein 32 precursor	0.992	0.997	bi (<->)	LAUA01000017	5290	373	fig|95486.65.peg.5290	WQ49_24095		Outer membrane porin protein 32 precursor	0.767	0.997	bi (<->)	NC_010084	3236	373	fig|395019.8.peg.3236	Bmul_3002		Outer membrane porin protein 32 precursor	0.769	0.997
NC_006350	2138	432	fig|272560.6.peg.2138	BPSL1895		PLF_32008_00001955	PGF_05783822	Type II/IV secretion system secretin RcpA/CpaC, associated with Flp pilus assembly	2257078	2258376	-	OuterMembrane	Y	Y	bi (<->)	NC_006348	1321	441	fig|243160.12.peg.1321	BMA1290		Type II/IV secretion system secretin RcpA/CpaC, associated with Flp pilus assembly	0.998	0.977	bi (<->)	LAUA01000017	6996	443	fig|95486.65.peg.6996	WQ49_32130		Type II/IV secretion system secretin RcpA/CpaC, associated with Flp pilus assembly	0.805	0.946	bi (<->)	NC_010084	1946	443	fig|395019.8.peg.1946	Bmul_1732		Type II/IV secretion system secretin RcpA/CpaC, associated with Flp pilus assembly	0.723	0.966	bi (<->)	CP104982	4684	416	fig|652611.54.peg.4684
NC_006350	1690	296	fig|272560.6.peg.1690	BPSL1504		PLF_32008_00016223	PGF_10363383	Murein hydrolase activator NlpD	1742297	1743187	+	OuterMembrane	Y	Y	bi (<->)	NC_006348	1394	296	fig|243160.12.peg.1394	BMA1355		Murein hydrolase activator NlpD	1	0.997	bi (<->)	LAUA01000017	6593	296	fig|95486.65.peg.6593	WQ49_30260		Murein hydrolase activator NlpD	0.765	0.99	bi (<->)	NC_010084	1650	290	fig|395019.8.peg.1650	Bmul_1452		Murein hydrolase activator NlpD	0.758	0.997	bi (<->)	CP104982	1427	297	fig|652611.54.peg.1427
NC_006351	4210	759	fig|272560.6.peg.4210	BPSS0244		PLF_32008_00126842	PGF_09526797	TonB-dependent hemin, ferrichrome receptor	330905	333184	-	OuterMembrane	Y	Y	bi (<->)	NC_006349	5425	767	fig|243160.12.peg.5425	BMAA1826		TonB-dependent hemin, ferrichrome receptor	0.983	0.999	bi (<->)	LAUA01000016	4957	757	fig|95486.65.peg.4957	WQ49_22550		TonB-dependent hemin, ferrichrome receptor	0.783	0.992	bi (<->)	NC_010086	3603	755	fig|395019.8.peg.3603	Bmul_3338		TonB-dependent hemin, ferrichrome receptor	0.752	0.992	bi (<->)	CP104982	5235	764	fig|652611.54.peg.5235
NC_006351	4976	374	fig|272560.6.peg.4976	BPSS0879		PLF_32008_00014029	PGF_03696773	Outer membrane porin	1172547	1173671	+	OuterMembrane	Y	Y	bi (<->)	NC_006349	4914	376	fig|243160.12.peg.4914	BMAA1353	opcP	Outer membrane porin	0.989	0.997	bi (<->)	LAUA01000002	1163	359	fig|95486.65.peg.1163	WQ49_05300		Outer membrane porin	0.782	0.997	bi (<->)	NC_010086	4218	363	fig|395019.8.peg.4218	Bmul_3938		Outer membrane porin	0.739	0.997
NC_006350	2224	624	fig|272560.6.peg.2224	BPSL1972		PLF_32008_00001980	PGF_00006637	Tetrapartite efflux system, outer membrane factor lipoprotein FusA-like => FusA of FusABCDE system	2347099	2348973	+	OuterMembrane		Y	bi (<->)	NC_006348	969	567	fig|243160.12.peg.969	BMA0935		Tetrapartite efflux system, outer membrane factor lipoprotein FusA-like => FusA of FusABCDE system	0.998	0.824	bi (<->)	LAUA01000017	7070	521	fig|95486.65.peg.7070	WQ49_32495		Tetrapartite efflux system, outer membrane factor lipoprotein FusA-like => FusA of FusABCDE system	0.737	0.946	bi (<->)	NC_010084	2070	532	fig|395019.8.peg.2070	Bmul_1866		Tetrapartite efflux system, outer membrane factor lipoprotein FusA-like => FusA of FusABCDE system	0.772	0.863	bi (<->)	CP104982	1103	506	fig|652611.54.peg.1103
NC_006350	452	309	fig|272560.6.peg.452	BPSL0403		PLF_32008_00127817	PGF_06256398	ABC transporter, substrate-binding protein (cluster 9, phospholipid)	437865	438794	+	Unknown	Y	Y	bi (<->)	NC_006348	58	309	fig|243160.12.peg.58	BMA0064		ABC transporter, substrate-binding protein (cluster 9, phospholipid)	1	0.997	bi (<->)	LAUA01000017	5421	309	fig|95486.65.peg.5421	WQ49_24670		ABC transporter, substrate-binding protein (cluster 9, phospholipid)	0.748	0.984	bi (<->)	NC_010084	542	309	fig|395019.8.peg.542	Bmul_0405		ABC transporter, substrate-binding protein (cluster 9, phospholipid)	0.758	0.987	bi (<->)	CP104982	1870	312	fig|652611.54.peg.1870
NC_006351	4758	400	fig|272560.6.peg.4758	BPSS0708		PLF_32008_00003996	PGF_08222751	FIG005478: Porin, Gram-negative type	953131	954333	+	OuterMembrane	Y	Y	bi (<->)	NC_006349	4661	400	fig|243160.12.peg.4661	BMAA1122		FIG005478: Porin, Gram-negative type	0.998	0.998	bi (<->)	LAUA01000002	566	399	fig|95486.65.peg.566	WQ49_02655		Outer membrane porin	0.744	0.997	bi (<->)	NC_010086	4649	439	fig|395019.8.peg.4649	Bmul_4327		Outer membrane porin	0.761	0.907
NC_006351	4856	379	fig|272560.6.peg.4856	BPSS0783		PLF_32008_00121588	PGF_00028108	Outer membrane porin protein 32 precursor; putative 3-hydroxyphenylpropionic acid porine	1047507	1048646	+	OuterMembrane		Y	bi (<->)	NC_006349	4142	379	fig|243160.12.peg.4142	BMAA0633		Outer membrane porin protein 32 precursor; putative 3-hydroxyphenylpropionic acid porine	0.989	0.997	bi (<->)	LAUA01000016	4773	382	fig|95486.65.peg.4773	WQ49_21730		Outer membrane porin protein 32 precursor; putative 3-hydroxyphenylpropionic acid porine	0.769	0.94	bi (<->)	NC_010086	3471	379	fig|395019.8.peg.3471	Bmul_3218		Outer membrane porin protein 32 precursor; putative 3-hydroxyphenylpropionic acid porine	0.741	0.997
NC_006350	362	387	fig|272560.6.peg.362	BPSL0326		PLF_32008_00236935	PGF_03696773	Outer membrane porin	348033	349196	+	OuterMembrane	Y	Y	bi (<->)	NC_006348	3482	179	fig|243160.12.peg.3482			Outer membrane porin	0.968	0.698	bi (<->)	LAUA01000017	5337	358	fig|95486.65.peg.5337	WQ49_24305		Outer membrane porin	0.768	0.997	bi (<->)	NC_010084	3195	358	fig|395019.8.peg.3195	Bmul_2963		Outer membrane porin	0.76	0.997
NC_006350	3622	459	fig|272560.6.peg.3622	BPSL3170		PLF_32008_00133710	PGF_00063770	Type IV pilus biogenesis protein PilQ	3774618	3775997	-	OuterMembrane		Y	bi (<->)	NC_006348	2817	462	fig|243160.12.peg.2817	BMA2748		Type IV pilus biogenesis protein PilQ	0.994	0.998	bi (<->)	LAUA01000004	2672	541	fig|95486.65.peg.2672	WQ49_12150		Type IV pilus biogenesis protein PilQ	0.73	0.787	bi (<->)	NC_010084	425	573	fig|395019.8.peg.425	Bmul_0294		Type IV pilus biogenesis protein PilQ	0.772	0.696	bi (<->)	CP104982	5582	710	fig|652611.54.peg.5582
NC_006350	3613	243	fig|272560.6.peg.3613	BPSL3161		PLF_32008_00030268	PGF_00027212	Outer membrane protein W precursor	3765568	3766299	+	OuterMembrane	Y	Y	bi (<->)	NC_006348	2808	243	fig|243160.12.peg.2808	BMA2738		Outer membrane protein W precursor	1	0.996	bi (<->)	LAUA01000004	2663	243	fig|95486.65.peg.2663	WQ49_12105		Outer membrane protein W precursor	0.741	0.996	bi (<->)	NC_010084	434	253	fig|395019.8.peg.434	Bmul_0303		Outer membrane protein	0.753	0.957	uni (->)	CP104982	922	232	fig|652611.54.peg.922
NC_006350	3357	183	fig|272560.6.peg.3357	BPSL2937		PLF_32008_00003681	PGF_00016305	LPS-assembly lipoprotein LptE	3507704	3508255	-	Unknown	Y	Y	bi (<->)	NC_006348	2528	183	fig|243160.12.peg.2528	BMA2452		LPS-assembly lipoprotein LptE	1	0.995	bi (<->)	LAUA01000001	111	183	fig|95486.65.peg.111	WQ49_00550		LPS-assembly lipoprotein LptE	0.744	0.956	bi (<->)	NC_010084	2968	183	fig|395019.8.peg.2968	Bmul_2731		LPS-assembly lipoprotein LptE	0.75	0.934	bi (<->)	CP104982	1001	207	fig|652611.54.peg.1001
NC_006350	3362	251	fig|272560.6.peg.3362	BPSL2942	omlA	PLF_32008_00001883	PGF_00048535	Outer membrane beta-barrel assembly protein BamE	3513232	3513987	-	OuterMembrane		Y	bi (<->)	NC_006348	2533	253	fig|243160.12.peg.2533	BMA2457		Outer membrane beta-barrel assembly protein BamE	0.988	0.996	bi (<->)	LAUA01000001	105	265	fig|95486.65.peg.105	WQ49_00525		Outer membrane beta-barrel assembly protein BamE	0.75	0.932	bi (<->)	NC_010084	2974	260	fig|395019.8.peg.2974	Bmul_2736		Outer membrane beta-barrel assembly protein BamE	0.755	0.923	bi (<->)	CP104982	5292	176	fig|652611.54.peg.5292
NC_006350	1763	634	fig|272560.6.peg.1763	BPSL1566		PLF_32008_00002498	PGF_06982509	Efflux transport system, outer membrane factor (OMF) lipoprotein	1817818	1819722	-	OuterMembrane	Y	Y	bi (<->)	NC_006348	987	634	fig|243160.12.peg.987	BMA0952		Efflux transport system, outer membrane factor (OMF) lipoprotein	0.992	0.998	bi (<->)	LAUA01000017	6680	521	fig|95486.65.peg.6680	WQ49_30670		Efflux transport system, outer membrane factor (OMF) lipoprotein	0.729	0.95	bi (<->)	NC_010084	1720	515	fig|395019.8.peg.1720	Bmul_1518		Efflux transport system, outer membrane factor (OMF) lipoprotein	0.764	0.93	uni (->)	CP104982	463	485	fig|652611.54.peg.463
NC_006351	4591	116	fig|272560.6.peg.4591	BPSS0571		PLF_32008_00003255	PGF_00038985	Purine nucleoside phosphorylase	777815	778165	-	Unknown	Y	Y	bi (<->)	NC_006349	4001	116	fig|243160.12.peg.4001	BMAA0495		Purine nucleoside phosphorylase	1	0.991	bi (<->)	LAUA01000002	1564	99	fig|95486.65.peg.1564	WQ49_07115		Purine nucleoside phosphorylase	0.755	0.99	bi (<->)	NC_010086	3874	99	fig|395019.8.peg.3874	Bmul_3593		Purine nucleoside phosphorylase	0.725	0.99
NC_006350	1078	1372	fig|272560.6.peg.1078	BPSL0995		PLF_32008_00000457	PGF_07075529	Inner membrane component of TAM transport system	1153273	1157391	+	OuterMembrane		Y	bi (<->)	NC_006348	726	1372	fig|243160.12.peg.726	BMA0706		Inner membrane component of TAM transport system	0.996	0.999	bi (<->)	LAUA01000017	5915	1347	fig|95486.65.peg.5915	WQ49_26995		Inner membrane component of TAM transport system	0.734	0.983	bi (<->)	NC_010084	1012	1346	fig|395019.8.peg.1012	Bmul_0856		Inner membrane component of TAM transport system	0.743	0.968	bi (<->)	CP104982	2641	1221	fig|652611.54.peg.2641
NC_006351	5160	888	fig|272560.6.peg.5160	BPSS1029		PLF_32008_00002969	PGF_10317782	Ferrichrome-iron receptor	1400492	1403158	+	OuterMembrane	Y	Y	bi (<->)	NC_006349	4722	881	fig|243160.12.peg.4722	BMAA1180		Ferrichrome-iron receptor	0.985	0.999	bi (<->)	LAUA01000017	7164	839	fig|95486.65.peg.7164	WQ49_32930		Outer membrane receptor proteins, mostly Fe transport @ Iron siderophore receptor protein	0.741	0.919	bi (<->)	NC_010084	2143	841	fig|395019.8.peg.2143	Bmul_1933		Ferrichrome-iron receptor	0.74	0.935	bi (<->)	CP104982	161	795	fig|652611.54.peg.161
NC_006350	453	212	fig|272560.6.peg.453	BPSL0404		PLF_32008_00126480	PGF_09166966	putative lipoprotein	438813	439451	+	Unknown	Y	Y	bi (<->)	NC_006348	57	212	fig|243160.12.peg.57	BMA0063		putative lipoprotein	0.986	0.995	bi (<->)	LAUA01000017	5422	207	fig|95486.65.peg.5422	WQ49_24675		putative lipoprotein	0.765	0.86	bi (<->)	NC_010084	543	212	fig|395019.8.peg.543	Bmul_0406		putative lipoprotein	0.713	0.981
NC_006350	2257	111	fig|272560.6.peg.2257	BPSL2003		PLF_32008_00003392	PGF_00196381	UPF0145 protein Bcep18194_B0595	2388211	2388546	+	Unknown	Y	Y	bi (<->)	NC_006348	936	111	fig|243160.12.peg.936	BMA0904		UPF0145 protein Bcep18194_B0595	1	0.991	bi (<->)	LAUA01000002	1586	122	fig|95486.65.peg.1586	WQ49_07215		UPF0145 protein Bcep18194_B0595	0.71	0.869	bi (<->)	NC_010086	3857	122	fig|395019.8.peg.3857	Bmul_3577		UPF0145 protein Bcep18194_B0595	0.748	0.836
NC_006350	3084	290	fig|272560.6.peg.3084	BPSL2704		PLF_32008_00002666	PGF_00028313	Outer membrane protein W	3233125	3233997	-	OuterMembrane	Y	Y	bi (<->)	NC_006348	2079	290	fig|243160.12.peg.2079	BMA2010		Outer membrane protein W	0.993	0.997	bi (<->)	LAUA01000002	1630	274	fig|95486.65.peg.1630	WQ49_07400		Outer membrane protein W	0.876	0.996	uni (->)	NC_010084	340	277	fig|395019.8.peg.340	Bmul_0214		Outer membrane protein W precursor	0.588	0.917	uni (->)	CP104982	922	232	fig|652611.54.peg.922
NC_006351	4990	458	fig|272560.6.peg.4990	BPSS0893		PLF_32008_00002084	PGF_03696773	Outer membrane porin	1184982	1186358	-	OuterMembrane		Y	bi (<->)	NC_006349	4899	383	fig|243160.12.peg.4899	BMAA1339		Outer membrane porin	0.995	0.997	bi (<->)	LAUA01000002	1088	359	fig|95486.65.peg.1088	WQ49_04985		Outer membrane porin	0.725	0.997	bi (<->)	NC_010086	4268	359	fig|395019.8.peg.4268	Bmul_3981		Outer membrane porin	0.733	0.953
NC_006350	3596	336	fig|272560.6.peg.3596	BPSL3147		PLF_32008_00002012	PGF_00028486	Outer-membrane-phospholipid-binding lipoprotein MlaA	3746560	3747570	-	OuterMembrane	Y	Y	bi (<->)	NC_006348	2792	319	fig|243160.12.peg.2792	BMA2723	vacJ	Outer-membrane-phospholipid-binding lipoprotein MlaA	0.991	0.997	bi (<->)	LAUA01000004	2643	320	fig|95486.65.peg.2643	WQ49_12020		Outer-membrane-phospholipid-binding lipoprotein MlaA	0.737	0.997	bi (<->)	NC_010084	453	325	fig|395019.8.peg.453	Bmul_0320		Outer-membrane-phospholipid-binding lipoprotein MlaA	0.723	0.997	uni (->)	CP104982	2298	234	fig|652611.54.peg.2298
NC_006351	4666	728	fig|272560.6.peg.4666	BPSS0632		PLF_32008_00002110	PGF_00051232	Serine protease	861344	863530	-	OuterMembrane		Y	bi (<->)	NC_006349	4344	728	fig|243160.12.peg.4344	BMAA0818		Serine protease	0.999	0.999	bi (<->)	LAUA01000002	1433	802	fig|95486.65.peg.1433	WQ49_06520		Serine protease	0.733	0.919	bi (<->)	NC_010086	3970	794	fig|395019.8.peg.3970	Bmul_3684		Outer membrane protein	0.718	0.924	bi (<->)	CP104982	1707	728	fig|652611.54.peg.1707
NC_006351	5973	430	fig|272560.6.peg.5973	BPSS1679		PLF_32008_00301439	PGF_03696773	Outer membrane porin	2305895	2307187	+	OuterMembrane	Y	Y	bi (<->)	NC_006349	5292	384	fig|243160.12.peg.5292	BMAA1698		Outer membrane porin	0.997	0.997	bi (<->)	LAUA01000017	7167	386	fig|95486.65.peg.7167	WQ49_32945		Outer membrane porin protein 32 precursor	0.659	0.997	bi (<->)	NC_010086	4942	361	fig|395019.8.peg.4942	Bmul_4600		Outer membrane porin	0.792	0.997
NC_006351	6737	144	fig|272560.6.peg.6737	BPSS2288		PLF_32008_00121764	PGF_00022442	Molecular chaperone (small heat shock protein)	3077355	3077789	-	Unknown	Y	Y	bi (<->)	NC_006349	5660	130	fig|243160.12.peg.5660	BMAA2035		Molecular chaperone (small heat shock protein)	0.985	0.992	bi (<->)	LAUA01000016	4412	144	fig|95486.65.peg.4412	WQ49_20075		Molecular chaperone (small heat shock protein)	0.734	0.986	bi (<->)	NC_010087	6225	144	fig|395019.8.peg.6225	Bmul_5914		Molecular chaperone (small heat shock protein)	0.727	0.986
NC_006351	6790	324	fig|272560.6.peg.6790	BPSS2331		PLF_32008_00001828	PGF_00028486	Outer-membrane-phospholipid-binding lipoprotein MlaA	3146493	3147467	+	OuterMembrane	Y	Y	bi (<->)	NC_006349	5714	327	fig|243160.12.peg.5714	BMAA2092		Outer-membrane-phospholipid-binding lipoprotein MlaA	0.996	0.865	bi (<->)	LAUA01000016	4729	335	fig|95486.65.peg.4729	WQ49_21530		Outer-membrane-phospholipid-binding lipoprotein MlaA	0.767	0.848	bi (<->)	NC_010086	3434	337	fig|395019.8.peg.3434	Bmul_3183		Outer-membrane-phospholipid-binding lipoprotein MlaA	0.681	0.988	bi (<->)	CP104982	2298	234	fig|652611.54.peg.2298
NC_006351	6060	250	fig|272560.6.peg.6060	BPSS1746		PLF_32008_00004289	PGF_10363383	Murein hydrolase activator NlpD	2396072	2396824	-	OuterMembrane		Y	bi (<->)	NC_006349	3921	250	fig|243160.12.peg.3921	BMAA0423		Murein hydrolase activator NlpD	1	0.996	bi (<->)	LAUA01000016	3691	244	fig|95486.65.peg.3691	WQ49_16775		Murein hydrolase activator NlpD	0.723	0.877	bi (<->)	NC_010086	5021	234	fig|395019.8.peg.5021	Bmul_4673		Murein hydrolase activator NlpD	0.719	0.923	uni (->)	CP104982	1427	297	fig|652611.54.peg.1427
NC_006350	3791	224	fig|272560.6.peg.3791	BPSL3334		PLF_32008_00003644	PGF_10475817	putative lipoprotein	3954560	3955234	-	Unknown	Y	Y	bi (<->)	NC_006348	2961	224	fig|243160.12.peg.2961	BMA2889		putative lipoprotein	1	0.996	bi (<->)	LAUA01000017	5297	224	fig|95486.65.peg.5297	WQ49_24120		putative lipoprotein	0.719	0.996	bi (<->)	NC_010084	3230	227	fig|395019.8.peg.3230	Bmul_2997		putative lipoprotein	0.719	0.982	bi (<->)	CP104982	53	221	fig|652611.54.peg.53
NC_006350	1224	182	fig|272560.6.peg.1224	BPSL1110		PLF_32008_00003512	PGF_03070309	Heat shock protein	1287413	1287961	-	Unknown	Y	Y	bi (<->)	NC_006348	1969	182	fig|243160.12.peg.1969	BMA1923		Heat shock protein	1	0.995	bi (<->)	LAUA01000017	6026	181	fig|95486.65.peg.6026	WQ49_27520		Heat shock protein	0.715	0.983	bi (<->)	NC_010084	1123	181	fig|395019.8.peg.1123	Bmul_0957		Heat shock protein	0.715	0.983
NC_006350	3085	417	fig|272560.6.peg.3085	BPSL2705		PLF_32008_00002658	PGF_00068826	Autotransporter adhesin	3234027	3235280	-	Unknown	Y	Y	bi (<->)	NC_006348	2080	406	fig|243160.12.peg.2080	BMA2011		Autotransporter adhesin	0.99	0.998	bi (<->)	LAUA01000002	1631	417	fig|95486.65.peg.1631	WQ49_07405		Autotransporter adhesin	0.832	0.998	uni (->)	NC_010084	341	415	fig|395019.8.peg.341	Bmul_0215		Autotransporter adhesin	0.588	0.954
NC_006350	1994	737	fig|272560.6.peg.1994	BPSL1775		PLF_32008_00003097	PGF_10317782	Ferrichrome-iron receptor	2095250	2097463	-	OuterMembrane	Y	Y	bi (<->)	NC_006348	1215	736	fig|243160.12.peg.1215	BMA1178		Ferrichrome-iron receptor	0.996	0.999	bi (<->)	LAUA01000017	6808	755	fig|95486.65.peg.6808	WQ49_31260		Ferrichrome-iron receptor	0.676	0.988	bi (<->)	NC_010084	1800	739	fig|395019.8.peg.1800	Bmul_1594		Ferrichrome-iron receptor	0.714	0.927	bi (<->)	CP104982	507	797	fig|652611.54.peg.507
NC_006350	2899	237	fig|272560.6.peg.2899	BPSL2543		PLF_32008_00003107	PGF_01084237	Probable lipoprotein transmembrane precursor	3067254	3067967	-	Unknown	Y	Y	bi (<->)	NC_006348	474	237	fig|243160.12.peg.474	BMA0465		Probable lipoprotein transmembrane precursor	1	0.996	bi (<->)	LAUA01000001	524	235	fig|95486.65.peg.524	WQ49_02470		Putative transmembrane lipoprotein	0.688	0.936	bi (<->)	NC_010084	2595	236	fig|395019.8.peg.2595	Bmul_2379		Putative transmembrane lipoprotein	0.692	0.932
NC_006350	566	154	fig|272560.6.peg.566	BPSL0505		PLF_32008_00002343	PGF_04732650	hypothetical protein	555475	555939	+	Unknown	Y	Y	bi (<->)	NC_006348	3215	154	fig|243160.12.peg.3215	BMA3136		hypothetical protein	0.994	0.994	bi (<->)	LAUA01000017	5516	189	fig|95486.65.peg.5516	WQ49_25110		hypothetical protein	0.658	0.804	bi (<->)	NC_010084	629	189	fig|395019.8.peg.629	Bmul_0487		hypothetical protein	0.723	0.804	bi (<->)	CP104982	5180	173	fig|652611.54.peg.5180
NC_006351	4183	473	fig|272560.6.peg.4183	BPSS0226		PLF_32008_00003765	PGF_08225224	hypothetical protein	305951	307372	+	OuterMembrane	Y	Y	bi (<->)	NC_006349	5454	432	fig|243160.12.peg.5454	BMAA1847		hypothetical protein	0.993	0.998	bi (<->)	LAUA01000016	4897	250	fig|95486.65.peg.4897			hypothetical protein	0.687	0.988	bi (<->)	NC_010086	3562	456	fig|395019.8.peg.3562	Bmul_3300		hypothetical protein	0.691	0.993
NC_006350	316	504	fig|272560.6.peg.316	BPSL0294		PLF_32008_00007810	PGF_09652645	Outer membrane low permeability porin, OprB family	306895	308409	-	OuterMembrane	Y	Y	bi (<->)	NC_006348	3439	504	fig|243160.12.peg.3439	BMA3354		Outer membrane low permeability porin, OprB family	1	0.998	bi (<->)	LAUA01000002	1311	495	fig|95486.65.peg.1311	WQ49_05980		Outer membrane low permeability porin, OprB family	0.789	0.871	bi (<->)	NC_010086	4291	483	fig|395019.8.peg.4291	Bmul_4004		Outer membrane low permeability porin, OprB family	0.575	0.899	bi (<->)	CP104982	2910	452	fig|652611.54.peg.2910
NC_006351	5855	1506	fig|272560.6.peg.5855	BPSS1580		PLF_32008_00002797	PGF_05341679	Cellulose synthase operon protein C	2145560	2150080	-	Unknown	Y	Y	bi (<->)	NC_006349	5172	1580	fig|243160.12.peg.5172	BMAA1588		Cellulose synthase operon protein C	0.982	0.895	bi (<->)	LAUA01000017	7141	1301	fig|95486.65.peg.7141	WQ49_32830		Cellulose synthase operon protein C	0.692	0.971	bi (<->)	NC_010084	2134	1313	fig|395019.8.peg.2134	Bmul_1924		Cellulose synthase operon protein C	0.686	0.957
NC_006350	3096	615	fig|272560.6.peg.3096	BPSL2715		PLF_32008_00011560	PGF_00416631	Carboxypeptidase C (cathepsin A)	3246675	3248522	-	Extracellular	Y	Y	bi (<->)	NC_006348	2091	615	fig|243160.12.peg.2091	BMA2026		Carboxypeptidase C (cathepsin A)	0.998	0.998	bi (<->)	LAUA01000001	340	611	fig|95486.65.peg.340	WQ49_01565		Carboxypeptidase C (cathepsin A)	0.814	0.975	uni (->)	NC_010086	3708	558	fig|395019.8.peg.3708	Bmul_3442		carboxypeptidase-related protein	0.537	0.923
NC_006350	1228	128	fig|272560.6.peg.1228	BPSL1113		PLF_32008_00004078	PGF_00020163	Inhibitor of vertebrate c-type lysozyme, outer membrane	1290292	1290678	+	OuterMembrane		Y	bi (<->)	NC_006348	1964	128	fig|243160.12.peg.1964	BMA1920		Inhibitor of vertebrate c-type lysozyme, outer membrane	1	0.992	bi (<->)	LAUA01000017	6029	126	fig|95486.65.peg.6029	WQ49_27535		Inhibitor of vertebrate c-type lysozyme, outer membrane	0.648	0.992	bi (<->)	NC_010084	1127	127	fig|395019.8.peg.1127	Bmul_0960		Inhibitor of vertebrate c-type lysozyme, outer membrane	0.693	0.976	bi (<->)	CP104982	4435	127	fig|652611.54.peg.4435
NC_006351	5176	399	fig|272560.6.peg.5176	BPSS1043	czcC	PLF_32008_00003583	PGF_00738678	Cobalt/zinc/cadmium efflux RND transporter, outer membrane protein CzcC	1421864	1423063	-	OuterMembrane	Y	Y	bi (<->)	NC_006349	4560	399	fig|243160.12.peg.4560	BMAA1031	czcC	Cobalt/zinc/cadmium efflux RND transporter, outer membrane protein CzcC	1	0.997	bi (<->)	LAUA01000016	3943	436	fig|95486.65.peg.3943	WQ49_17915		Cobalt/zinc/cadmium efflux RND transporter, outer membrane protein CzcC	0.669	0.872	bi (<->)	NC_010070	11	435	fig|395019.8.peg.11	Bmul_6170		Cobalt/zinc/cadmium efflux RND transporter, outer membrane protein CzcC	0.667	0.874	bi (<->)	CP104982	2663	428	fig|652611.54.peg.2663
NC_006350	3560	211	fig|272560.6.peg.3560	BPSL3108		PLF_32008_00002553	PGF_00003608	FIG140336: TPR domain protein	3713279	3713914	-	Unknown	Y	Y											bi (<->)	LAUA01000004	2607	208	fig|95486.65.peg.2607	WQ49_11835		FIG140336: TPR domain protein	0.827	0.769	bi (<->)	NC_010084	3161	193	fig|395019.8.peg.3161	Bmul_2931		FIG140336: TPR domain protein	0.725	0.995
NC_006351	6294	506	fig|272560.6.peg.6294	BPSS1936		PLF_32008_00004312	PGF_06982509	Efflux transport system, outer membrane factor (OMF) lipoprotein	2618546	2620066	+	OuterMembrane	Y	Y	bi (<->)	NC_006349	3638	508	fig|243160.12.peg.3638	BMAA0141		Efflux transport system, outer membrane factor (OMF) lipoprotein	1	0.994	bi (<->)	LAUA01000016	4383	498	fig|95486.65.peg.4383	WQ49_19935		Efflux transport system, outer membrane factor (OMF) lipoprotein	0.666	0.922	bi (<->)	NC_010087	6192	497	fig|395019.8.peg.6192	Bmul_5881		Efflux transport system, outer membrane factor (OMF) lipoprotein	0.645	0.95	uni (->)	CP104982	463	485	fig|652611.54.peg.463
NC_006351	4930	279	fig|272560.6.peg.4930	BPSS0839		PLF_32008_00002709	PGF_00066032	Universal stress protein family, tandem domain	1124884	1125723	-	Unknown	Y	Y	bi (<->)	NC_006349	4223	279	fig|243160.12.peg.4223	BMAA0708		Universal stress protein family, tandem domain	1	0.996	bi (<->)	LAUA01000016	4394	279	fig|95486.65.peg.4394	WQ49_19990		Universal stress protein family, tandem domain	0.652	0.996	bi (<->)	NC_010087	6208	279	fig|395019.8.peg.6208	Bmul_5897		Universal stress protein family, tandem domain	0.638	0.996
NC_006351	4458	554	fig|272560.6.peg.4458	BPSS0455		PLF_32008_00002745	PGF_00419581	Copper tolerance protein	621586	623250	+	OuterMembrane		Y											bi (<->)	LAUA01000016	4235	504	fig|95486.65.peg.4235	WQ49_19245		Copper tolerance protein	0.753	0.984	bi (<->)	NC_010070	102	498	fig|395019.8.peg.102	Bmul_6292		Copper tolerance protein	0.747	0.992
NC_006350	786	1038	fig|272560.6.peg.786	BPSL0719		PLF_32008_00002060	PGF_05537159	Membrane carboxypeptidase (penicillin-binding protein)	822429	825545	-	OuterMembrane		Y											bi (<->)	LAUA01000017	5675	1035	fig|95486.65.peg.5675	WQ49_25870		Membrane carboxypeptidase (penicillin-binding protein)	0.75	0.997	bi (<->)	NC_010084	785	1035	fig|395019.8.peg.785	Bmul_0636		Membrane carboxypeptidase (penicillin-binding protein)	0.742	0.997	bi (<->)	CP104982	4526	1041	fig|652611.54.peg.4526
NC_006351	4928	279	fig|272560.6.peg.4928	BPSS0837		PLF_32008_00002813	PGF_00066032	Universal stress protein family, tandem domain	1123382	1124221	-	Unknown	Y	Y	bi (<->)	NC_006349	4221	279	fig|243160.12.peg.4221	BMAA0706		Universal stress protein family, tandem domain	1	0.996	bi (<->)	LAUA01000016	4397	277	fig|95486.65.peg.4397	WQ49_20005		Universal stress protein family, tandem domain	0.615	0.996	bi (<->)	NC_010087	6211	278	fig|395019.8.peg.6211	Bmul_5900		Universal stress protein family, tandem domain	0.616	0.996
NC_006351	4823	384	fig|272560.6.peg.4823	BPSS0757		PLF_32008_00003352	PGF_03696773	Outer membrane porin	1017268	1018422	+	OuterMembrane	Y	Y	bi (<->)	NC_006349	4105	384	fig|243160.12.peg.4105	BMAA0599		Outer membrane porin	0.997	0.997	uni (->)	LAUA01000001	508	383	fig|95486.65.peg.508	WQ49_02385		Outer membrane porin	0.52	0.997	bi (<->)	NC_010086	4603	380	fig|395019.8.peg.4603	Bmul_4283		Outer membrane porin	0.678	0.997
NC_006350	2576	115	fig|272560.6.peg.2576	BPSL2268		PLF_32008_00022594	PGF_08225224	hypothetical protein	2732638	2732985	+	Unknown	Y	Y	bi (<->)	NC_006348	1725	111	fig|243160.12.peg.1725			hypothetical protein	0.939	0.991	bi (<->)	LAUA01000017	6290	121	fig|95486.65.peg.6290	WQ49_28775		hypothetical protein	0.619	0.917	bi (<->)	NC_010084	1347	115	fig|395019.8.peg.1347	Bmul_1169		hypothetical protein	0.633	0.835
NC_006351	4646	257	fig|272560.6.peg.4646	BPSS0614		PLF_32008_00002144	PGF_00044198	Putative stomatin/prohibitin-family membrane protease subunit aq_911	837977	838750	-	Unknown	Y	Y	uni (->)	NC_006348	1576	315	fig|243160.12.peg.1576	BMA1533		Protein QmcA (possibly involved in integral membrane quality control)	0.374	0.641	bi (<->)	LAUA01000002	1462	257	fig|95486.65.peg.1462	WQ49_06655		Putative stomatin/prohibitin-family membrane protease subunit aq_911	0.905	0.977	bi (<->)	NC_010086	3937	257	fig|395019.8.peg.3937	Bmul_3653		Putative stomatin/prohibitin-family membrane protease subunit aq_911	0.901	0.977	bi (<->)	CP104982	489	263	fig|652611.54.peg.489
NC_006350	3557	167	fig|272560.6.peg.3557	BPSL3105		PLF_32008_00002269	PGF_01920524	T6SS component Hcp	3710641	3711144	-	Extracellular	Y	Y	uni (->)	NC_006349	5525	161	fig|243160.12.peg.5525	BMAA1911		T6SS component Hcp	0.305	0.907	bi (<->)	LAUA01000004	2604	167	fig|95486.65.peg.2604	WQ49_11820		T6SS component Hcp	0.916	0.994	bi (<->)	NC_010084	3158	167	fig|395019.8.peg.3158	Bmul_2928		T6SS component Hcp	0.934	0.994	bi (<->)	CP104982	2836	165	fig|652611.54.peg.2836
NC_006351	5006	820	fig|272560.6.peg.5006	BPSS0908		PLF_32008_00003506	PGF_05606505	Cell surface protein	1200354	1202816	+	OuterMembrane		Y	bi (<->)	NC_006349	4883	771	fig|243160.12.peg.4883	BMAA1324		Cell surface protein	1	0.999	bi (<->)	LAUA01000014	3509	1396	fig|95486.65.peg.3509	WQ49_15925		Cell surface protein	0.4	0.39
NC_006350	751	123	fig|272560.6.peg.751	BPSL0689		PLF_32008_00002759	PGF_02969811	hypothetical protein	786186	786557	+	Unknown	Y	Y	bi (<->)	NC_006348	240	123	fig|243160.12.peg.240			hypothetical protein	1	0.992	bi (<->)	LAUA01000017	5661	102	fig|95486.65.peg.5661	WQ49_25800		hypothetical protein	0.562	0.98	bi (<->)	NC_010084	768	118	fig|395019.8.peg.768	Bmul_0621		hypothetical protein	0.533	0.975
NC_006351	5376	748	fig|272560.6.peg.5376	BPSS1204		PLF_32008_00002718	PGF_10317782	Ferrichrome-iron receptor	1626389	1628635	+	OuterMembrane	Y	Y	uni (->)	NC_006349	4722	881	fig|243160.12.peg.4722	BMAA1180		Ferrichrome-iron receptor	0.269	0.758	bi (<->)	LAUA01000002	1249	747	fig|95486.65.peg.1249	WQ49_05705		Ferrichrome-iron receptor	0.898	0.999	bi (<->)	NC_010086	4089	748	fig|395019.8.peg.4089	Bmul_3795		Ferrichrome-iron receptor	0.909	0.999	bi (<->)	CP104982	4903	753	fig|652611.54.peg.4903
NC_006351	5489	521	fig|272560.6.peg.5489	BPSS1287		PLF_32008_00004180	PGF_10509868	Type I secretion outer membrane protein, TolC family	1758332	1759897	+	OuterMembrane		Y	bi (<->)	NC_006349	4526	446	fig|243160.12.peg.4526	BMAA0997		Type I secretion outer membrane protein, TolC family	0.996	0.998	bi (<->)	LAUA01000014	3288	438	fig|95486.65.peg.3288	WQ49_14925		Type I secretion outer membrane protein, TolC family	0.84	0.957	uni (->)	NC_010084	2168	477	fig|395019.8.peg.2168	Bmul_1955		Type I secretion outer membrane protein, TolC family	0.24	0.379	bi (<->)	CP104982	5512	482	fig|652611.54.peg.5512
NC_006351	6738	380	fig|272560.6.peg.6738	BPSS2289		PLF_32008_00004154	PGF_03696773	Outer membrane porin	3078195	3079337	-	OuterMembrane		Y	bi (<->)	NC_006349	5661	391	fig|243160.12.peg.5661	BMAA2036		Outer membrane porin	0.997	0.969	bi (<->)	LAUA01000017	6769	374	fig|95486.65.peg.6769	WQ49_31080		Outer membrane porin	0.736	0.949	bi (<->)	NC_010087	6291	356	fig|395019.8.peg.6291	Bmul_5977		Outer membrane porin	0.343	0.935
NC_006350	3086	532	fig|272560.6.peg.3086	BPSL2706		PLF_32008_00121076	PGF_00068826	Autotransporter adhesin	3235340	3236938	-	Unknown	Y	Y	bi (<->)	NC_006348	2081	532	fig|243160.12.peg.2081			Autotransporter adhesin	0.994	0.998	bi (<->)	LAUA01000002	1632	532	fig|95486.65.peg.1632	WQ49_07410		Autotransporter adhesin	0.724	0.998	uni (->)	NC_010084	342	469	fig|395019.8.peg.342	Bmul_0216		Autotransporter adhesin	0.358	0.994
NC_006351	4439	559	fig|272560.6.peg.4439	BPSS0443		PLF_32008_00005247	PGF_01399791	FIG022068: Hypothetical protein	607224	608903	+	OuterMembrane		Y											bi (<->)	LAUA01000017	7123	501	fig|95486.65.peg.7123	WQ49_32740		FIG022068: Hypothetical protein	0.69	0.872
NC_006351	5056	315	fig|272560.6.peg.5056	BPSS0945		PLF_32008_00003386	PGF_10363383	Murein hydrolase activator NlpD	1247073	1248020	+	OuterMembrane		Y	bi (<->)	NC_006349	4838	315	fig|243160.12.peg.4838	BMAA1284		Murein hydrolase activator NlpD	0.994	0.997	bi (<->)	LAUA01000002	1011	289	fig|95486.65.peg.1011	WQ49_04620		Murein hydrolase activator NlpD	0.516	0.993	bi (<->)	NC_010086	4336	284	fig|395019.8.peg.4336	Bmul_4047		Murein hydrolase activator NlpD	0.54	0.993	uni (->)	CP104982	1427	297	fig|652611.54.peg.1427
NC_006351	5908	284	fig|272560.6.peg.5908	BPSS1624		PLF_32008_00003078	PGF_04646018	Type III secretion bridge between inner and outermembrane lipoprotein (YscJ,HrcJ,EscJ, PscJ)	2198712	2199566	+	OuterMembrane		Y	bi (<->)	NC_006349	5224	174	fig|243160.12.peg.5224			Type III secretion bridge between inner and outermembrane lipoprotein (YscJ,HrcJ,EscJ, PscJ)	0.989	0.994	uni (->)	LAUA01000002	1299	294	fig|95486.65.peg.1299	WQ49_05925		hypothetical protein	0.532	0.578	uni (->)	NC_010086	4038	293	fig|395019.8.peg.4038	Bmul_3744		hypothetical protein	0.52	0.58	uni (->)	CP104982	3519	248	fig|652611.54.peg.3519
NC_006350	2283	569	fig|272560.6.peg.2283	BPSL2022		PLF_32008_00004652	PGF_06982509	Efflux transport system, outer membrane factor (OMF) lipoprotein	2415405	2417114	+	OuterMembrane		Y	bi (<->)	NC_006348	911	514	fig|243160.12.peg.911			Efflux transport system, outer membrane factor (OMF) lipoprotein	0.985	0.767	uni (->)	LAUA01000003	1977	475	fig|95486.65.peg.1977	WQ49_08990		Efflux transport system, outer membrane factor (OMF) lipoprotein	0.319	0.964	bi (<->)	NC_010087	5888	576	fig|395019.8.peg.5888	Bmul_5523		Efflux transport system, outer membrane factor (OMF) lipoprotein	0.736	0.858	bi (<->)	CP104982	2253	479	fig|652611.54.peg.2253
NC_006351	4557	527	fig|272560.6.peg.4557	BPSS0540		PLF_32008_00001111	PGF_03005053	Outer membrane factor (OMF) lipoprotein associated wth EmrAB-OMF efflux system	736025	737608	+	OuterMembrane	Y	Y	uni (->)	NC_006349	4442	531	fig|243160.12.peg.4442	BMAA0924		Outer membrane factor (OMF) lipoprotein associated wth EmrAB-OMF efflux system	0.99	0.934	uni (->)	LAUA01000002	1615	620	fig|95486.65.peg.1615	WQ49_07345		Outer membrane factor (OMF) lipoprotein associated wth EmrAB-OMF efflux system	0.662	0.76	uni (->)	NC_010084	1964	498	fig|395019.8.peg.1964	Bmul_1750		Outer membrane factor (OMF) lipoprotein associated wth EmrAB-OMF efflux system	0.386	0.89	uni (->)	CP104982	5704	492	fig|652611.54.peg.5704
NC_006351	5566	527	fig|272560.6.peg.5566	BPSS1348		PLF_32008_00001111	PGF_03005053	Outer membrane factor (OMF) lipoprotein associated wth EmrAB-OMF efflux system	1840349	1841932	-	OuterMembrane		Y	bi (<->)	NC_006349	4442	531	fig|243160.12.peg.4442	BMAA0924		Outer membrane factor (OMF) lipoprotein associated wth EmrAB-OMF efflux system	0.99	0.934	bi (<->)	LAUA01000002	1615	620	fig|95486.65.peg.1615	WQ49_07345		Outer membrane factor (OMF) lipoprotein associated wth EmrAB-OMF efflux system	0.662	0.76	uni (->)	NC_010084	1964	498	fig|395019.8.peg.1964	Bmul_1750		Outer membrane factor (OMF) lipoprotein associated wth EmrAB-OMF efflux system	0.386	0.89	uni (->)	CP104982	5704	492	fig|652611.54.peg.5704
NC_006351	6286	494	fig|272560.6.peg.6286	BPSS1929		PLF_32008_00005315	PGF_06982509	Efflux transport system, outer membrane factor (OMF) lipoprotein	2612032	2613516	-	OuterMembrane		Y	bi (<->)	NC_006349	3646	779	fig|243160.12.peg.3646			hypothetical protein	0.995	0.548	uni (->)	LAUA01000017	6680	521	fig|95486.65.peg.6680	WQ49_30670		Efflux transport system, outer membrane factor (OMF) lipoprotein	0.365	0.889	bi (<->)	NC_010087	6200	470	fig|395019.8.peg.6200	Bmul_5889		Efflux transport system, outer membrane factor (OMF) lipoprotein	0.665	0.994	uni (->)	CP104982	2659	498	fig|652611.54.peg.2659
NC_006351	6158	391	fig|272560.6.peg.6158	BPSS1831		PLF_32008_00001952	PGF_00034917	Putative polysaccharide export protein YccZ precursor	2491078	2492253	-	OuterMembrane	Y	Y	uni (->)	NC_006348	41	429	fig|243160.12.peg.41	BMA0047		Putative polysaccharide export protein YccZ precursor	0.462	0.956	bi (<->)	LAUA01000016	3786	392	fig|95486.65.peg.3786	WQ49_17200		Putative polysaccharide export protein YccZ precursor	0.768	0.997	bi (<->)	NC_010086	5232	384	fig|395019.8.peg.5232	Bmul_4916		Putative polysaccharide export protein YccZ precursor	0.786	0.997
NC_006351	4218	399	fig|272560.6.peg.4218	BPSS0252		PLF_32008_00004209	PGF_00461601	Outer membrane porin protein 32 precursor	339553	340752	+	OuterMembrane		Y	bi (<->)	NC_006349	5416	399	fig|243160.12.peg.5416	BMAA1817		Outer membrane porin protein 32 precursor	1	0.997	bi (<->)	LAUA01000002	1754	397	fig|95486.65.peg.1754	WQ49_07950		Outer membrane porin	0.5	0.997	bi (<->)	NC_010086	3731	397	fig|395019.8.peg.3731	Bmul_3463		Outer membrane porin protein 32 precursor; putative 3-hydroxyphenylpropionic acid porine	0.51	0.947
NC_006350	47	366	fig|272560.6.peg.47	BPSL0044		PLF_32008_00003037	PGF_03696773	Outer membrane porin	47789	48889	+	OuterMembrane		Y	bi (<->)	NC_006348	2739	366	fig|243160.12.peg.2739	BMA2671		Outer membrane porin	0.997	0.997	bi (<->)	LAUA01000016	4679	363	fig|95486.65.peg.4679	WQ49_21305		Outer membrane porin	0.483	0.997	bi (<->)	NC_010087	6393	362	fig|395019.8.peg.6393	Bmul_6067		Outer membrane porin	0.511	0.989
NC_006351	5077	1131	fig|272560.6.peg.5077	BPSS0962		PLF_32008_00003358	PGF_01071779	Serine protease, subtilase family	1270105	1273500	+	OuterMembrane	Y	Y	bi (<->)	NC_006349	4817	1131	fig|243160.12.peg.4817	BMAA1263		Serine protease, subtilase family	0.995	0.999	bi (<->)	LAUA01000003	2133	786	fig|95486.65.peg.2133			putative autotransporter protein	0.328	0.838											bi (<->)	CP104982	1519	995	fig|652611.54.peg.1519
NC_006350	3203	373	fig|272560.6.peg.3203	BPSL2807	wcbC	PLF_32008_00002419	PGF_00944330	Capsular polysaccharide biosynthesis/export periplasmic protein WcbC	3355330	3356451	-	OuterMembrane	Y	Y	bi (<->)	NC_006348	2373	373	fig|243160.12.peg.2373	BMA2307		Capsular polysaccharide biosynthesis/export periplasmic protein WcbC	1	0.997	bi (<->)	LAUA01000001	247	390	fig|95486.65.peg.247	WQ49_01170		Capsular polysaccharide biosynthesis/export periplasmic protein WcbC	0.701	0.959	uni (->)	NC_010086	4735	398	fig|395019.8.peg.4735	Bmul_4409		Putative polysaccharide export protein YccZ precursor	0.278	0.729
NC_006351	4531	175	fig|272560.6.peg.4531	BPSS0518		PLF_32008_00003710	PGF_01920524	T6SS component Hcp	705288	705815	+	Extracellular	Y	Y	bi (<->)	NC_006349	3939	175	fig|243160.12.peg.3939	BMAA0440		T6SS component Hcp	0.994	0.994											uni (->)	NC_010086	4189	161	fig|395019.8.peg.4189	Bmul_3909		T6SS component Hcp	0.325	0.957	uni (->)	CP104982	92	162	fig|652611.54.peg.92
NC_006351	4795	619	fig|272560.6.peg.4795	BPSS0734	oprM	PLF_32008_00004657	PGF_06982509	Efflux transport system, outer membrane factor (OMF) lipoprotein	985782	987641	-	OuterMembrane		Y	bi (<->)	NC_006349	4956	619	fig|243160.12.peg.4956	BMAA1392		Efflux transport system, outer membrane factor (OMF) lipoprotein	0.997	0.998	uni (->)	LAUA01000003	1977	475	fig|95486.65.peg.1977	WQ49_08990		Efflux transport system, outer membrane factor (OMF) lipoprotein	0.468	0.992	uni (->)	NC_010084	836	507	fig|395019.8.peg.836	Bmul_0690		Efflux transport system, outer membrane factor (OMF) lipoprotein	0.499	0.937	uni (->)	CP104982	463	485	fig|652611.54.peg.463
NC_006351	6036	495	fig|272560.6.peg.6036	BPSS1728		PLF_32008_00004575	PGF_01078001	Channel-forming transporter of TpsB family	2370877	2372364	-	OuterMembrane		Y	bi (<->)	NC_006349	5355	554	fig|243160.12.peg.5355	BMAA1757		Channel-forming transporter of TpsB family	0.998	0.892											uni (->)	NC_010084	2283	584	fig|395019.8.peg.2283	Bmul_2070		Channel-forming transporter/cytolysins activator of TpsB family	0.307	0.627	uni (->)	CP104982	2722	565	fig|652611.54.peg.2722
NC_006350	3545	471	fig|272560.6.peg.3545	BPSL3094		PLF_32008_00003077	PGF_02294394	Type I secretion outer membrane protein, TolC family	3693323	3694738	+	OuterMembrane		Y	bi (<->)	NC_006348	2891	471	fig|243160.12.peg.2891	BMA2822		Type I secretion outer membrane protein, TolC family	0.996	0.998	bi (<->)	LAUA01000002	1099	514	fig|95486.65.peg.1099	WQ49_05035		Type I secretion outer membrane protein, TolC family	0.303	0.817	bi (<->)	NC_010084	2168	477	fig|395019.8.peg.2168	Bmul_1955		Type I secretion outer membrane protein, TolC family	0.657	0.954	bi (<->)	CP104982	845	471	fig|652611.54.peg.845
NC_006350	3106	723	fig|272560.6.peg.3106	BPSL2724		PLF_32008_00004095	PGF_00027686	Outer membrane (iron.B12.siderophore.hemin) receptor	3258434	3260605	-	OuterMembrane	Y	Y	bi (<->)	NC_006348	2102	756	fig|243160.12.peg.2102	BMA2036		Outer membrane (iron.B12.siderophore.hemin) receptor	0.989	0.954	bi (<->)	LAUA01000017	7192	696	fig|95486.65.peg.7192	WQ49_33060		Outer membrane (iron.B12.siderophore.hemin) receptor	0.686	0.968	uni (->)	NC_010086	3452	701	fig|395019.8.peg.3452	Bmul_3200		Ferrichrome-iron receptor	0.253	0.981	bi (<->)	CP104982	2175	718	fig|652611.54.peg.2175
NC_006350	1092	744	fig|272560.6.peg.1092	BPSL1007		PLF_32008_00003007	PGF_00052144	Sigma-fimbriae usher protein	1171461	1173695	-	OuterMembrane		Y	bi (<->)	NC_006348	738	766	fig|243160.12.peg.738	BMA0719		Sigma-fimbriae usher protein	0.993	0.97	bi (<->)	LAUA01000017	5927	793	fig|95486.65.peg.5927	WQ49_27045		Sigma-fimbriae usher protein	0.674	0.929	uni (->)	NC_010084	1818	818	fig|395019.8.peg.1818	Bmul_1611		P pilus assembly protein, porin PapC	0.26	0.715	uni (->)	CP104982	5171	790	fig|652611.54.peg.5171
NC_006350	2028	516	fig|272560.6.peg.2028	BPSL1802		PLF_32008_00250701	PGF_06982509	Efflux transport system, outer membrane factor (OMF) lipoprotein	2146271	2147821	-	OuterMembrane		Y	uni (->)	NC_006348	315	508	fig|243160.12.peg.315	BMA0317		Efflux transport system, outer membrane factor (OMF) lipoprotein	0.464	0.909	bi (<->)	LAUA01000017	6835	487	fig|95486.65.peg.6835	WQ49_31375		Multidrug efflux system, outer membrane factor associated with MexXY/AxyXY system	0.74	0.926	bi (<->)	NC_010084	1821	487	fig|395019.8.peg.1821	Bmul_1614		Multidrug efflux system, outer membrane factor associated with MexXY/AxyXY system	0.717	0.945	uni (->)	CP104982	463	485	fig|652611.54.peg.463
NC_006351	6459	378	fig|272560.6.peg.6459	BPSS2064		PLF_32008_00026130	PGF_01034714	Outer membrane porin OmpC	2798378	2799514	-	OuterMembrane		Y	uni (->)	NC_006348	762	358	fig|243160.12.peg.762	BMA0743		Outer membrane porin OmpC	0.652	0.997	uni (->)	LAUA01000017	5949	358	fig|95486.65.peg.5949	WQ49_27155		Outer membrane porin OmpC	0.628	0.95	uni (->)	NC_010084	1038	361	fig|395019.8.peg.1038	Bmul_0880		Outer membrane porin	0.63	0.947
NC_006350	2730	196	fig|272560.6.peg.2730	BPSL2395		PLF_32008_00002034	PGF_10489100	putative lipoprotein	2891689	2892279	-	Unknown	Y	Y	uni (->)	NC_006348	1874	166	fig|243160.12.peg.1874	BMA1838		Probable lipoprotein transmembrane precursor	0.336	0.723	bi (<->)	LAUA01000017	7491	184	fig|95486.65.peg.7491	WQ49_34395		putative lipoprotein	0.772	0.989	bi (<->)	NC_010084	2347	185	fig|395019.8.peg.2347	Bmul_2130		putative lipoprotein	0.772	0.989
NC_006351	4811	358	fig|272560.6.peg.4811	BPSS0747		PLF_32008_00121008	PGF_03696773	Outer membrane porin	1004779	1005855	+	OuterMembrane		Y	bi (<->)	NC_006349	4093	358	fig|243160.12.peg.4093	BMAA0587		Outer membrane porin	1	0.997	uni (->)	LAUA01000001	508	383	fig|95486.65.peg.508	WQ49_02385		Outer membrane porin	0.429	0.969	uni (->)	NC_010084	2613	402	fig|395019.8.peg.2613	Bmul_2395		Outer membrane porin	0.451	0.896
NC_006351	5881	589	fig|272560.6.peg.5881	BPSS1600	pilN	PLF_32008_00003135	PGF_03537557	Lipoprotein	2174832	2176601	-	OuterMembrane	Y	Y	bi (<->)	NC_006349	5196	590	fig|243160.12.peg.5196	BMAA1610		Lipoprotein	0.995	0.998											bi (<->)	NC_010087	5920	529	fig|395019.8.peg.5920	Bmul_5552		Lipoprotein	0.249	0.703	bi (<->)	CP104982	4966	569	fig|652611.54.peg.4966
NC_006351	5007	276	fig|272560.6.peg.5007	BPSS0909		PLF_32008_00003523	PGF_08447327	Outer membrane protein A precursor	1202875	1203705	+	OuterMembrane		Y	bi (<->)	NC_006349	4882	276	fig|243160.12.peg.4882	BMAA1323		Outer membrane protein A precursor	1	0.996	uni (->)	LAUA01000017	7637	222	fig|95486.65.peg.7637	WQ49_35110		Outer membrane protein A precursor	0.414	0.55	bi (<->)	NC_010086	3799	266	fig|395019.8.peg.3799	Bmul_3525		Outer membrane protein A precursor	0.449	0.974	uni (->)	CP104982	1358	261	fig|652611.54.peg.1358
NC_006350	558	833	fig|272560.6.peg.558	BPSL0500		PLF_32008_00002550	PGF_03071282	beta-N-acetylglucosaminidase (EC 3.2.1.52)	546569	549070	-	OuterMembrane		Y	bi (<->)	NC_006348	3252	833	fig|243160.12.peg.3252	BMA3173		beta-N-acetylglucosaminidase (EC 3.2.1.52)	0.993	0.999	bi (<->)	LAUA01000017	5507	828	fig|95486.65.peg.5507	WQ49_25080		beta-N-acetylglucosaminidase (EC 3.2.1.52)	0.868	0.935									0	0
NC_006351	5482	498	fig|272560.6.peg.5482	BPSS1282		PLF_32008_00004151	PGF_00028312	Outer membrane protein W	1751486	1752982	-	OuterMembrane		Y	bi (<->)	NC_006349	4533	277	fig|243160.12.peg.4533	BMAA1003		Outer membrane protein W	0.996	0.996	bi (<->)	LAUA01000014	3282	464	fig|95486.65.peg.3282	WQ49_14900		Outer membrane protein W	0.553	0.961	uni (->)	NC_010084	340	277	fig|395019.8.peg.340	Bmul_0214		Outer membrane protein W precursor	0.311	0.917
NC_006350	672	429	fig|272560.6.peg.672	BPSL0619		PLF_32008_00003473	PGF_00034917	Putative polysaccharide export protein YccZ precursor	700889	702178	+	OuterMembrane		Y	bi (<->)	NC_006348	41	429	fig|243160.12.peg.41	BMA0047		Putative polysaccharide export protein YccZ precursor	0.998	0.998	uni (->)	LAUA01000016	3786	392	fig|95486.65.peg.3786	WQ49_17200		Putative polysaccharide export protein YccZ precursor	0.43	0.985	uni (->)	NC_010086	5232	384	fig|395019.8.peg.5232	Bmul_4916		Putative polysaccharide export protein YccZ precursor	0.428	0.997
NC_006350	2328	236	fig|272560.6.peg.2328	BPSL2062		PLF_32008_00004698	PGF_01078077	Outer membrane protein and related peptidoglycan-associated (lipo)proteins	2467187	2467897	-	OuterMembrane		Y	bi (<->)	NC_006348	870	236	fig|243160.12.peg.870	BMA0841		Outer membrane protein and related peptidoglycan-associated (lipo)proteins	0.996	0.996	bi (<->)	LAUA01000002	1717	220	fig|95486.65.peg.1717	WQ49_07810		Outer membrane protein	0.379	0.9	uni (->)	NC_010084	2494	222	fig|395019.8.peg.2494	Bmul_2265		Outer membrane protein A precursor	0.44	0.545	uni (->)	CP104982	4251	210	fig|652611.54.peg.4251
NC_006351	6648	385	fig|272560.6.peg.6648	BPSS2223		PLF_32008_00002030	PGF_01035860	Outer membrane protein V	2997308	2998465	-	Unknown	Y	Y	uni (->)	NC_006349	4681	248	fig|243160.12.peg.4681	BMAA1143		Outer membrane protein V	0.314	0.935	bi (<->)	LAUA01000002	691	293	fig|95486.65.peg.691	WQ49_03225		Outer membrane protein V	0.747	0.874	bi (<->)	NC_010086	4550	345	fig|395019.8.peg.4550	Bmul_4235		Outer membrane protein V	0.733	0.745
NC_006350	2025	813	fig|272560.6.peg.2025	BPSL1800		PLF_32008_00005167	PGF_00028974	P pilus assembly protein, porin PapC	2141243	2143684	-	OuterMembrane		Y	uni (->)	NC_006348	1060	833	fig|243160.12.peg.1060	BMA1023		hypothetical protein	0.305	0.945	bi (<->)	LAUA01000017	6832	817	fig|95486.65.peg.6832	WQ49_31365		P pilus assembly protein, porin PapC	0.723	0.999	bi (<->)	NC_010084	1818	818	fig|395019.8.peg.1818	Bmul_1611		P pilus assembly protein, porin PapC	0.737	0.99	uni (->)	CP104982	4303	839	fig|652611.54.peg.4303
NC_006351	5873	601	fig|272560.6.peg.5873	BPSS1592		PLF_32008_00024092	PGF_00063577	Type III secretion outermembrane pore forming protein (YscC,MxiD,HrcC, InvG)	2165625	2167430	-	OuterMembrane	Y	Y	bi (<->)	NC_006349	5188	599	fig|243160.12.peg.5188	BMAA1602		Type III secretion outermembrane pore forming protein (YscC,MxiD,HrcC, InvG)	0.992	0.998	uni (->)	LAUA01000002	1303	681	fig|95486.65.peg.1303	WQ49_05945		hypothetical protein	0.361	0.338	uni (->)	NC_010086	4033	678	fig|395019.8.peg.4033	Bmul_3741		hypothetical protein	0.375	0.841	uni (->)	CP104982	3526	600	fig|652611.54.peg.3526
NC_006350	1058	685	fig|272560.6.peg.1058	BPSL0976		PLF_32008_00002355	PGF_10321419	Outer membrane vitamin B12 receptor BtuB	1133678	1135735	+	OuterMembrane	Y	Y	bi (<->)	NC_006348	706	685	fig|243160.12.peg.706	BMA0685		Outer membrane vitamin B12 receptor BtuB	0.991	0.999	bi (<->)	LAUA01000002	796	642	fig|95486.65.peg.796	WQ49_03660		Outer membrane vitamin B12 receptor BtuB	0.394	0.327	bi (<->)	NC_010086	4482	638	fig|395019.8.peg.4482	Bmul_4173		Outer membrane vitamin B12 receptor BtuB	0.308	0.864	bi (<->)	CP104982	3991	616	fig|652611.54.peg.3991
NC_006350	3202	515	fig|272560.6.peg.3202	BPSL2806	wcbD	PLF_32008_00004458	PGF_09349532	Capsular polysaccharide export system inner membrane protein KpsE	3353701	3355248	-	Unknown	Y	Y	bi (<->)	NC_006348	2372	515	fig|243160.12.peg.2372			Capsular polysaccharide export system inner membrane protein KpsE	1	0.998	bi (<->)	LAUA01000001	248	296	fig|95486.65.peg.248			hypothetical protein	0.433	0.986	bi (<->)	NC_010084	2833	300	fig|395019.8.peg.2833	Bmul_2610		hypothetical protein	0.26	0.987
NC_006351	6493	1209	fig|272560.6.peg.6493	BPSS2104		PLF_32008_00003133	PGF_06086184	T6SS component TssM (IcmF/VasK)	2847580	2851209	-	OuterMembrane		Y	bi (<->)	NC_006349	3897	1209	fig|243160.12.peg.3897	BMAA0399		T6SS component TssM (IcmF/VasK)	0.999	0.999	uni (->)	LAUA01000004	2596	1314	fig|95486.65.peg.2596	WQ49_11780		T6SS component TssM (IcmF/VasK)	0.31	0.395	uni (->)	NC_010086	4200	1366	fig|395019.8.peg.4200	Bmul_3922		T6SS component TssM (IcmF/VasK)	0.345	0.737	bi (<->)	CP104982	83	1177	fig|652611.54.peg.83
NC_006351	6567	359	fig|272560.6.peg.6567	BPSS2160		PLF_32008_00003522	PGF_00461601	Outer membrane porin protein 32 precursor	2922210	2923289	+	OuterMembrane		Y	bi (<->)	NC_006349	5569	359	fig|243160.12.peg.5569	BMAA1952		Outer membrane porin protein 32 precursor	0.994	0.997	uni (->)	LAUA01000014	3218	363	fig|95486.65.peg.3218	WQ49_14625		FIG005478: Porin, Gram-negative type	0.315	0.826	uni (->)	NC_010086	4686	360	fig|395019.8.peg.4686	Bmul_4363		FIG005478: Porin, Gram-negative type	0.328	0.833
NC_006350	2287	803	fig|272560.6.peg.2287	BPSL2027		PLF_32008_00003400	PGF_00052144	Sigma-fimbriae usher protein	2421524	2423935	-	OuterMembrane		Y	bi (<->)	NC_006348	905	554	fig|243160.12.peg.905			Sigma-fimbriae usher protein	0.993	0.998	uni (->)	LAUA01000017	5927	793	fig|95486.65.peg.5927	WQ49_27045		Sigma-fimbriae usher protein	0.36	0.919	uni (->)	NC_010084	1818	818	fig|395019.8.peg.1818	Bmul_1611		P pilus assembly protein, porin PapC	0.239	0.835	bi (<->)	CP104982	5171	790	fig|652611.54.peg.5171
NC_006350	1836	833	fig|272560.6.peg.1836	BPSL1628		PLF_32008_00004523	PGF_08225224	hypothetical protein	1885136	1887637	+	OuterMembrane		Y	bi (<->)	NC_006348	1060	833	fig|243160.12.peg.1060	BMA1023		hypothetical protein	0.996	0.999	uni (->)	LAUA01000017	6832	817	fig|95486.65.peg.6832	WQ49_31365		P pilus assembly protein, porin PapC	0.299	0.923	uni (->)	NC_010084	1818	818	fig|395019.8.peg.1818	Bmul_1611		P pilus assembly protein, porin PapC	0.295	0.971	bi (<->)	CP104982	4303	839	fig|652611.54.peg.4303
NC_006351	5808	315	fig|272560.6.peg.5808	BPSS1550		PLF_32008_00005013	PGF_04646018	Type III secretion bridge between inner and outermembrane lipoprotein (YscJ,HrcJ,EscJ, PscJ)	2103636	2104583	+	OuterMembrane		Y	bi (<->)	NC_006349	5126	316	fig|243160.12.peg.5126	BMAA1550	basJ	Type III secretion bridge between inner and outermembrane lipoprotein (YscJ,HrcJ,EscJ, PscJ)	0.972	0.997	uni (->)	LAUA01000002	1299	294	fig|95486.65.peg.1299	WQ49_05925		hypothetical protein	0.309	0.582	uni (->)	NC_010086	4038	293	fig|395019.8.peg.4038	Bmul_3744		hypothetical protein	0.297	0.584	uni (->)	CP104982	3519	248	fig|652611.54.peg.3519
NC_006351	6446	570	fig|272560.6.peg.6446	BPSS2052		PLF_32008_00000008	PGF_00707159	Channel-forming transporter/cytolysins activator of TpsB family	2768149	2769861	-	OuterMembrane	Y	Y	uni (->)	NC_006349	5355	554	fig|243160.12.peg.5355	BMAA1757		Channel-forming transporter of TpsB family	0.264	0.868											bi (<->)	NC_010084	2283	584	fig|395019.8.peg.2283	Bmul_2070		Channel-forming transporter/cytolysins activator of TpsB family	0.782	0.973	bi (<->)	CP104982	2722	565	fig|652611.54.peg.2722
NC_006351	5802	620	fig|272560.6.peg.5802	BPSS1545	bsaO	PLF_32008_00003544	PGF_00063577	Type III secretion outermembrane pore forming protein (YscC,MxiD,HrcC, InvG)	2098689	2100551	-	OuterMembrane	Y	Y	bi (<->)	NC_006349	5120	625	fig|243160.12.peg.5120	BMAA1544	bsaO	Type III secretion outermembrane pore forming protein (YscC,MxiD,HrcC, InvG)	0.989	0.998	uni (->)	LAUA01000002	1303	681	fig|95486.65.peg.1303	WQ49_05945		hypothetical protein	0.258	0.909	uni (->)	NC_010086	4033	678	fig|395019.8.peg.4033	Bmul_3741		hypothetical protein	0.267	0.833	bi (<->)	CP104982	3526	600	fig|652611.54.peg.3526
NC_006351	5884	601	fig|272560.6.peg.5884	BPSS1603		PLF_32008_00004795	PGF_10319468	Type III secretion outermembrane pore forming protein (YscC,MxiD,HrcC, InvG)	2178792	2180597	-	OuterMembrane		Y	bi (<->)	NC_006349	5199	596	fig|243160.12.peg.5199	BMAA1613		Type III secretion outermembrane pore forming protein (YscC,MxiD,HrcC, InvG)	0.946	0.956	uni (->)	LAUA01000002	1303	681	fig|95486.65.peg.1303	WQ49_05945		hypothetical protein	0.269	0.508	uni (->)	NC_010086	4033	678	fig|395019.8.peg.4033	Bmul_3741		hypothetical protein	0.259	0.692	uni (->)	CP104982	3526	600	fig|652611.54.peg.3526
NC_006351	4656	460	fig|272560.6.peg.4656	BPSS0623		PLF_32008_00004943	PGF_06982509	Efflux transport system, outer membrane factor (OMF) lipoprotein	849810	851192	-	OuterMembrane	Y	Y	uni (->)	NC_006349	3638	508	fig|243160.12.peg.3638	BMAA0141		Efflux transport system, outer membrane factor (OMF) lipoprotein	0.319	0.801	bi (<->)	LAUA01000002	1450	459	fig|95486.65.peg.1450	WQ49_06600		Efflux transport system, outer membrane factor (OMF) lipoprotein	0.748	0.932	uni (->)	NC_010087	6192	497	fig|395019.8.peg.6192	Bmul_5881		Efflux transport system, outer membrane factor (OMF) lipoprotein	0.348	0.915	bi (<->)	CP104982	2811	472	fig|652611.54.peg.2811
NC_006350	3174	400	fig|272560.6.peg.3174	BPSL2780		PLF_32008_00002061	PGF_00034917	Putative polysaccharide export protein YccZ precursor	3318268	3319470	-	OuterMembrane		Y	uni (->)	NC_006348	41	429	fig|243160.12.peg.41	BMA0047		Putative polysaccharide export protein YccZ precursor	0.319	0.925	bi (<->)	LAUA01000016	4485	431	fig|95486.65.peg.4485	WQ49_20405		Putative polysaccharide export protein YccZ precursor	0.567	0.926	bi (<->)	NC_010086	4735	398	fig|395019.8.peg.4735	Bmul_4409		Putative polysaccharide export protein YccZ precursor	0.509	0.937
NC_006351	6622	354	fig|272560.6.peg.6622	BPSS2202		PLF_32008_00004396	PGF_03696773	Outer membrane porin	2969380	2970444	+	OuterMembrane		Y	uni (->)	NC_006348	3431	363	fig|243160.12.peg.3431	BMA3345		Outer membrane porin protein 32 precursor	0.463	0.994	uni (->)	LAUA01000017	5290	373	fig|95486.65.peg.5290	WQ49_24095		Outer membrane porin protein 32 precursor	0.458	0.938	uni (->)	NC_010084	3236	373	fig|395019.8.peg.3236	Bmul_3002		Outer membrane porin protein 32 precursor	0.461	0.938
NC_006350	1887	366	fig|272560.6.peg.1887	BPSL1674		PLF_32008_00004210	PGF_03696773	Outer membrane porin	1953075	1954175	-	OuterMembrane		Y	uni (->)	NC_006348	2639	386	fig|243160.12.peg.2639	BMA2562		Outer membrane porin	0.448	0.997	uni (->)	LAUA01000001	4	383	fig|95486.65.peg.4	WQ49_00030		Outer membrane porin	0.462	0.997	uni (->)	NC_010084	3078	389	fig|395019.8.peg.3078	Bmul_2847		Outer membrane porin	0.453	0.997
NC_006350	1866	391	fig|272560.6.peg.1866	BPSL1655		PLF_32008_00005661	PGF_03696773	Outer membrane porin	1917777	1918952	+	OuterMembrane		Y	uni (->)	NC_006348	2639	386	fig|243160.12.peg.2639	BMA2562		Outer membrane porin	0.447	0.987	uni (->)	LAUA01000001	4	383	fig|95486.65.peg.4	WQ49_00030		Outer membrane porin	0.444	0.987	uni (->)	NC_010086	5470	396	fig|395019.8.peg.5470	Bmul_5138		Outer membrane porin	0.466	0.997
NC_006351	4617	717	fig|272560.6.peg.4617	BPSS0591	fptA	PLF_32008_00004152	PGF_00028385	Outer membrane receptor for ferric-pyochelin FptA @ Outer membrane receptor for ferric siderophore	811187	813340	+	OuterMembrane	Y	Y	uni (->)	NC_006348	1215	736	fig|243160.12.peg.1215	BMA1178		Ferrichrome-iron receptor	0.274	0.928	bi (<->)	LAUA01000002	1494	727	fig|95486.65.peg.1494	WQ49_06785		Outer membrane receptor for ferric-pyochelin FptA @ Outer membrane receptor for ferric siderophore	0.833	0.944	uni (->)	NC_010084	3174	733	fig|395019.8.peg.3174	Bmul_2944		Ferrichrome-iron receptor	0.249	0.935	bi (<->)	CP104982	767	720	fig|652611.54.peg.767
NC_006350	1839	1124	fig|272560.6.peg.1839	BPSL1631		PLF_32008_00004145	PGF_00011520	Hep_Hag family protein/haemagluttinin motif family protein/YadA-like domain protein	1889771	1893145	+	OuterMembrane	Y	Y																					uni (->)	NC_010084	927	613	fig|395019.8.peg.927	Bmul_0774		Outer membrane protein	0.443	0.904
NC_006351	6375	138	fig|272560.6.peg.6375	BPSS1996		PLF_32008_00273926	PGF_08225224	hypothetical protein	2700895	2701311	+	Unknown	Y	Y											bi (<->)	LAUA01000002	1692	114	fig|95486.65.peg.1692	WQ49_07690		hypothetical protein	0.425	0.746
NC_006351	4010	670	fig|272560.6.peg.4010	BPSS0088		PLF_32008_00005150	PGF_08225224	hypothetical protein	105215	107227	+	OuterMembrane		Y	uni (->)	NC_006349	4160	1474	fig|243160.12.peg.4160	BMAA0649		Streptococcal hemagglutinin protein	0.375	0.332											bi (<->)	NC_010084	927	613	fig|395019.8.peg.927	Bmul_0774		Outer membrane protein	0.462	0.909
NC_006351	5623	588	fig|272560.6.peg.5623	BPSS1390	sctC	PLF_32008_00004944	PGF_00063577	Type III secretion outermembrane pore forming protein (YscC,MxiD,HrcC, InvG)	1903732	1905498	-	OuterMembrane		Y	uni (->)	NC_006349	5188	599	fig|243160.12.peg.5188	BMAA1602		Type III secretion outermembrane pore forming protein (YscC,MxiD,HrcC, InvG)	0.521	0.965	bi (<->)	LAUA01000002	1303	681	fig|95486.65.peg.1303	WQ49_05945		hypothetical protein	0.364	0.846	bi (<->)	NC_010086	4033	678	fig|395019.8.peg.4033	Bmul_3741		hypothetical protein	0.358	0.848	uni (->)	CP104982	3526	600	fig|652611.54.peg.3526
NC_006351	4700	575	fig|272560.6.peg.4700	BPSS0655		PLF_32008_00004812	PGF_08225224	hypothetical protein	888888	890615	+	OuterMembrane		Y	uni (->)	NC_006348	2570	544	fig|243160.12.peg.2570	BMA2492		Carboxypeptidase C (cathepsin A)	0.402	0.897	uni (->)	LAUA01000001	70	536	fig|95486.65.peg.70	WQ49_00355		Carboxypeptidase C (cathepsin A)	0.394	0.907	uni (->)	NC_010084	3007	526	fig|395019.8.peg.3007	Bmul_2770		Carboxypeptidase C (cathepsin A)	0.397	0.952
NC_006350	1871	254	fig|272560.6.peg.1871	BPSL1659		PLF_32008_00005810	PGF_08447327	Outer membrane protein A precursor	1922345	1923109	+	OuterMembrane	Y	Y	uni (->)	NC_006349	4882	276	fig|243160.12.peg.4882	BMAA1323		Outer membrane protein A precursor	0.328	0.851	uni (->)	LAUA01000017	7637	222	fig|95486.65.peg.7637	WQ49_35110		Outer membrane protein A precursor	0.374	0.527	uni (->)	NC_010086	3799	266	fig|395019.8.peg.3799	Bmul_3525		Outer membrane protein A precursor	0.352	0.827	uni (->)	CP104982	4251	210	fig|652611.54.peg.4251
NC_006350	2046	482	fig|272560.6.peg.2046	BPSL1818		PLF_32008_00002863	PGF_05783822	Type II/IV secretion system secretin RcpA/CpaC, associated with Flp pilus assembly	2165512	2166960	-	OuterMembrane		Y	uni (->)	NC_006348	1321	441	fig|243160.12.peg.1321	BMA1290		Type II/IV secretion system secretin RcpA/CpaC, associated with Flp pilus assembly	0.354	0.932	uni (->)	LAUA01000003	2152	644	fig|95486.65.peg.2152	WQ49_09750		Type II/IV secretion system secretin RcpA/CpaC, associated with Flp pilus assembly	0.338	0.615	uni (->)	NC_010084	1946	443	fig|395019.8.peg.1946	Bmul_1732		Type II/IV secretion system secretin RcpA/CpaC, associated with Flp pilus assembly	0.341	0.912	uni (->)	CP104982	4684	416	fig|652611.54.peg.4684
NC_006351	5867	466	fig|272560.6.peg.5867	BPSS1588		PLF_32008_00003443	PGF_00202220	hypothetical protein	2160486	2161886	+	OuterMembrane		Y	bi (<->)	NC_006349	5183	466	fig|243160.12.peg.5183	BMAA1597.1		hypothetical protein	1	0.998									0	0									0	0
NC_006350	3051	257	fig|272560.6.peg.3051	BPSL2678	wbiC	PLF_32008_00004838	PGF_04305571	Glycosyltransferase	3205081	3205854	-	Unknown	Y	Y	bi (<->)	NC_006348	2049	294	fig|243160.12.peg.2049	BMA1982		Glycosyltransferase	0.996	0.871									0	0									0	0
NC_006350	2540	610	fig|272560.6.peg.2540	BPSL2237		PLF_32008_00004045	PGF_04713687	Phospholipase/lecithinase/hemolysin	2696054	2697886	-	OuterMembrane		Y	bi (<->)	NC_006348	1688	610	fig|243160.12.peg.1688	BMA1647		Phospholipase/lecithinase/hemolysin	0.993	0.998									0	0									0	0	bi (<->)	CP104982	5457	307	fig|652611.54.peg.5457
NC_006350	3504	326	fig|272560.6.peg.3504	BPSL3066		PLF_32008_00003098	PGF_04776928	Glycerophosphoryl diester phosphodiesterase (EC 3.1.4.46)	3657986	3658966	-	Unknown	Y	Y	bi (<->)	NC_006349	4022	325	fig|243160.12.peg.4022	BMAA0512		Glycerophosphoryl diester phosphodiesterase (EC 3.1.4.46)	0.991	0.997									0	0									0	0	bi (<->)	CP104982	5320	311	fig|652611.54.peg.5320
NC_006351	6035	901	fig|272560.6.peg.6035	BPSS1727		PLF_32008_00004581	PGF_01078007	Filamentous hemagglutinin	2368050	2370755	-	OuterMembrane		Y	bi (<->)	NC_006349	5354	905	fig|243160.12.peg.5354	BMAA1756		Filamentous hemagglutinin	0.988	0.991									0	0									0	0
NC_006351	4016	898	fig|272560.6.peg.4016	BPSS0093		PLF_32008_00146696	PGF_08225224	hypothetical protein	111690	114386	+	OuterMembrane		Y	uni (->)	NC_006348	1060	833	fig|243160.12.peg.1060	BMA1023		hypothetical protein	0.384	0.946	uni (->)	LAUA01000017	6832	817	fig|95486.65.peg.6832	WQ49_31365		P pilus assembly protein, porin PapC	0.288	0.968	uni (->)	NC_010084	1818	818	fig|395019.8.peg.1818	Bmul_1611		P pilus assembly protein, porin PapC	0.29	0.946	bi (<->)	CP104982	904	926	fig|652611.54.peg.904
NC_006351	4044	789	fig|272560.6.peg.4044	BPSS0120		PLF_32008_00006703	PGF_06565048	hypothetical protein	153167	155536	-	OuterMembrane		Y	uni (->)	NC_006348	1060	833	fig|243160.12.peg.1060	BMA1023		hypothetical protein	0.25	0.977	bi (<->)	LAUA01000017	6662	814	fig|95486.65.peg.6662	WQ49_30590		hypothetical protein	0.286	0.939	bi (<->)	NC_010086	4810	870	fig|395019.8.peg.4810	Bmul_4479		Uncharacterized outer membrane usher protein YhcD	0.25	0.97	uni (->)	CP104982	4303	839	fig|652611.54.peg.4303
NC_006350	1872	571	fig|272560.6.peg.1872	BPSL1660		PLF_32008_00005389	PGF_01081924	hypothetical protein	1923322	1925037	+	Unknown	Y	Y	uni (->)	NC_006348	1092	498	fig|243160.12.peg.1092	BMA1056		Outer membrane factor (OMF) lipoprotein associated wth EmrAB-OMF efflux system	0.239	0.653	uni (->)	LAUA01000017	7013	510	fig|95486.65.peg.7013	WQ49_32210		Outer membrane factor (OMF) lipoprotein associated wth EmrAB-OMF efflux system	0.234	0.659	uni (->)	NC_010084	1964	498	fig|395019.8.peg.1964	Bmul_1750		Outer membrane factor (OMF) lipoprotein associated wth EmrAB-OMF efflux system	0.265	0.428
NC_006350	3805	403	fig|272560.6.peg.3805	BPSL3347		PLF_32008_00010930	PGF_08225224	hypothetical protein	3969661	3970872	-	OuterMembrane		Y	uni (->)	NC_006348	2856	757	fig|243160.12.peg.2856	BMA2786	gspD	General secretion pathway protein D	0.24	0.378	uni (->)	LAUA01000007	2810	777	fig|95486.65.peg.2810	WQ49_12820		General secretion pathway protein D	0.248	0.363	uni (->)	NC_010084	175	768	fig|395019.8.peg.175	Bmul_0063		General secretion pathway protein D	0.249	0.37	uni (->)	CP104982	4644	803	fig|652611.54.peg.4644
NC_006350	196	347	fig|272560.6.peg.196	BPSL0186	mreB	PLF_32008_00000206	PGF_00648450	Rod shape-determining protein MreB	191813	192856	-	Cytoplasmic	Y		bi (<->)	NC_006348	160	347	fig|243160.12.peg.160	BMA0162	mreB	Rod shape-determining protein MreB	1	0.997	bi (<->)	LAUA01000017	5179	347	fig|95486.65.peg.5179	WQ49_23595		Rod shape-determining protein MreB	1	0.997	bi (<->)	NC_010084	3355	347	fig|395019.8.peg.3355	Bmul_3107		Rod shape-determining protein MreB	1	0.997	bi (<->)	CP104982	4870	345	fig|652611.54.peg.4870
NC_006350	85	44	fig|272560.6.peg.85	BPSL0075a	rpmH	PLF_32008_00001396	PGF_00016418	LSU ribosomal protein L34p	87398	87532	+	Cytoplasmic			bi (<->)	NC_006348	3490	44	fig|243160.12.peg.3490	BMA3400	rpmH	LSU ribosomal protein L34p	1	0.977	bi (<->)	LAUA01000017	5116	44	fig|95486.65.peg.5116	WQ49_23295		LSU ribosomal protein L34p	1	0.977	bi (<->)	NC_010084	3409	44	fig|395019.8.peg.3409	Bmul_3157	rpmH	LSU ribosomal protein L34p	1	0.977	bi (<->)	CP104982	6129	44	fig|652611.54.peg.6129
NC_006350	530	273	fig|272560.6.peg.530	BPSL0473		PLF_32008_00004416	PGF_08225224	hypothetical protein	513457	514278	-	Cytoplasmic			bi (<->)	NC_006348	3224	273	fig|243160.12.peg.3224	BMA3146		hypothetical protein	1	0.996																					bi (<->)	CP104982	5767	273	fig|652611.54.peg.5767
NC_006350	998	77	fig|272560.6.peg.998	BPSL0916	rpmB	PLF_32008_00000784	PGF_03278866	LSU ribosomal protein L28p @ LSU ribosomal protein L28p, zinc-independent	1069402	1069635	-	Cytoplasmic			bi (<->)	NC_006348	2295	65	fig|243160.12.peg.2295	BMA2231	rpmB	LSU ribosomal protein L28p @ LSU ribosomal protein L28p, zinc-independent	1	0.985	bi (<->)	LAUA01000017	5845	77	fig|95486.65.peg.5845	WQ49_26660	rpmB	LSU ribosomal protein L28p @ LSU ribosomal protein L28p, zinc-independent	1	0.987	bi (<->)	NC_010084	946	77	fig|395019.8.peg.946	Bmul_0793	rpmB	LSU ribosomal protein L28p @ LSU ribosomal protein L28p, zinc-independent	1	0.987	bi (<->)	CP104982	5868	78	fig|652611.54.peg.5868
NC_006350	1578	109	fig|272560.6.peg.1578	BPSL1406		PLF_32008_00004161	PGF_01074991	Ribosomal arrest protein RaiA	1637455	1637784	-	Cytoplasmic			bi (<->)	NC_006348	1500	109	fig|243160.12.peg.1500	BMA1460		Ribosomal arrest protein RaiA	1	0.991
NC_006350	1824	232	fig|272560.6.peg.1824	BPSL1618		PLF_32008_00004373	PGF_01076358	hypothetical protein	1875876	1876574	-	Cytoplasmic			bi (<->)	NC_006348	1047	197	fig|243160.12.peg.1047	BMA1006		hypothetical protein	1	0.995
NC_006350	1957	418	fig|272560.6.peg.1957	BPSL1743	arcA	PLF_32008_00002471	PGF_02462544	Arginine deiminase (EC 3.5.3.6)	2055327	2056583	+	Cytoplasmic			bi (<->)	NC_006348	1177	425	fig|243160.12.peg.1177	BMA1145	arcA	Arginine deiminase (EC 3.5.3.6)	1	0.981																					bi (<->)	CP104982	5717	418	fig|652611.54.peg.5717
NC_006350	2155	493	fig|272560.6.peg.2155	BPSL1910		PLF_32008_00000003	PGF_04444701	Transposase, IS4	2274956	2276437	+	Cytoplasmic			bi (<->)	NC_006348	1547	493	fig|243160.12.peg.1547	BMA1503		Transposase, IS4	1	0.998
NC_006350	2188	119	fig|272560.6.peg.2188	BPSL1942	rplT	PLF_32008_00000400	PGF_00016358	LSU ribosomal protein L20p	2313383	2313742	-	Cytoplasmic			bi (<->)	NC_006348	1126	119	fig|243160.12.peg.1126	BMA1093	rplT	LSU ribosomal protein L20p	1	0.992	bi (<->)	LAUA01000017	7041	119	fig|95486.65.peg.7041	WQ49_32355	rplT	LSU ribosomal protein L20p	1	0.992	bi (<->)	NC_010084	1990	119	fig|395019.8.peg.1990	Bmul_1776	rplT	LSU ribosomal protein L20p	1	0.992	bi (<->)	CP104982	2372	118	fig|652611.54.peg.2372
NC_006350	2189	65	fig|272560.6.peg.2189	BPSL1943	rpmI	PLF_32008_00000401	PGF_03818138	LSU ribosomal protein L35p	2313773	2313970	-	Cytoplasmic			bi (<->)	NC_006348	1127	68	fig|243160.12.peg.1127	BMA1094	rpmI	LSU ribosomal protein L35p	1	0.941	bi (<->)	LAUA01000017	7042	65	fig|95486.65.peg.7042	WQ49_32360		LSU ribosomal protein L35p	1	0.985	bi (<->)	NC_010084	1991	65	fig|395019.8.peg.1991	Bmul_1777	rpmI	LSU ribosomal protein L35p	1	0.985	bi (<->)	CP104982	2371	64	fig|652611.54.peg.2371
NC_006350	2680	583	fig|272560.6.peg.2680	BPSL2356		PLF_32008_00003478	PGF_00048627	Ribonucleotide reductase of class III (anaerobic), large subunit (EC 1.17.4.2)	2849782	2851533	+	Cytoplasmic			bi (<->)	NC_006348	650	583	fig|243160.12.peg.650	BMA0629	nrdD	Ribonucleotide reductase of class III (anaerobic), large subunit (EC 1.17.4.2)	1	0.998																					bi (<->)	CP104982	3302	675	fig|652611.54.peg.3302
NC_006350	2682	227	fig|272560.6.peg.2682	BPSL2358		PLF_32008_00003432	PGF_01641254	Ribonucleotide reductase of class III (anaerobic), activating protein (EC 1.97.1.4)	2851803	2852486	+	Cytoplasmic			bi (<->)	NC_006348	648	227	fig|243160.12.peg.648	BMA0627		Ribonucleotide reductase of class III (anaerobic), activating protein (EC 1.97.1.4)	1	0.996																					bi (<->)	CP104982	3304	232	fig|652611.54.peg.3304
NC_006350	2781	79	fig|272560.6.peg.2781	BPSL2439	acpP	PLF_32008_00000725	PGF_07487229	Acyl carrier protein	2944967	2945206	-	Cytoplasmic			bi (<->)	NC_006348	547	79	fig|243160.12.peg.547	BMA0533	acpP	Acyl carrier protein	1	0.987	bi (<->)	LAUA01000017	7549	79	fig|95486.65.peg.7549	WQ49_34685		Acyl carrier protein	1	0.987	bi (<->)	NC_010084	2402	79	fig|395019.8.peg.2402	Bmul_2180	acpP	Acyl carrier protein	1	0.987	bi (<->)	CP104982	2116	78	fig|652611.54.peg.2116
NC_006350	3192	301	fig|272560.6.peg.3192	BPSL2796	wcbL	PLF_32008_00004254	PGF_00420760	D-glycero-alpha-D-manno-heptose 7-phosphate kinase (EC 2.7.1.168)	3342743	3343648	-	Cytoplasmic			bi (<->)	NC_006348	2363	301	fig|243160.12.peg.2363	BMA2296	hddA	D-glycero-alpha-D-manno-heptose 7-phosphate kinase (EC 2.7.1.168)	1	0.997
NC_006350	3196	598	fig|272560.6.peg.3196	BPSL2800	wcbH	PLF_32008_00004449	PGF_00228637	hypothetical protein	3346614	3348410	-	Cytoplasmic			bi (<->)	NC_006348	2366	598	fig|243160.12.peg.2366	BMA2300		hypothetical protein	1	0.998
NC_006350	3252	377	fig|272560.6.peg.3252	BPSL2851	phnM	PLF_32008_00002715	PGF_03376086	Alpha-D-ribose 1-methylphosphonate 5-triphosphate diphosphatase (EC 3.6.1.63)	3413504	3414637	-	Cytoplasmic			bi (<->)	NC_006348	2481	377	fig|243160.12.peg.2481	BMA2406	phnM	Alpha-D-ribose 1-methylphosphonate 5-triphosphate diphosphatase (EC 3.6.1.63)	1	0.997																					bi (<->)	CP104982	1668	387	fig|652611.54.peg.1668
NC_006350	3642	133	fig|272560.6.peg.3642	BPSL3189	rpsK	PLF_32008_00000568	PGF_00049837	SSU ribosomal protein S11p (S14e)	3797060	3797461	-	Cytoplasmic			bi (<->)	NC_006348	2679	133	fig|243160.12.peg.2679	BMA2608	rpsK	SSU ribosomal protein S11p (S14e)	1	0.992	bi (<->)	LAUA01000004	2692	133	fig|95486.65.peg.2692	WQ49_12245		SSU ribosomal protein S11p (S14e)	1	0.992	bi (<->)	NC_010084	401	133	fig|395019.8.peg.401	Bmul_0273		SSU ribosomal protein S11p (S14e)	1	0.992	bi (<->)	CP104982	748	129	fig|652611.54.peg.748
NC_006350	3644	38	fig|272560.6.peg.3644	BPSL3191	rpmJ	PLF_32008_00001091	PGF_00016424	LSU ribosomal protein L36p @ LSU ribosomal protein L36p, zinc-dependent	3797889	3798005	-	Cytoplasmic			bi (<->)	NC_006348	2681	38	fig|243160.12.peg.2681	BMA2610	rpmJ	LSU ribosomal protein L36p @ LSU ribosomal protein L36p, zinc-dependent	1	0.974	bi (<->)	LAUA01000004	2694	38	fig|95486.65.peg.2694	WQ49_12255		LSU ribosomal protein L36p @ LSU ribosomal protein L36p, zinc-dependent	1	0.974	bi (<->)	NC_010084	399	38	fig|395019.8.peg.399	Bmul_0271	rpmJ	LSU ribosomal protein L36p @ LSU ribosomal protein L36p, zinc-dependent	1	0.974	bi (<->)	CP104982	746	38	fig|652611.54.peg.746
NC_006350	3661	109	fig|272560.6.peg.3661	BPSL3208	rplV	PLF_32008_00000936	PGF_00016368	LSU ribosomal protein L22p (L17e)	3805747	3806076	-	Cytoplasmic			bi (<->)	NC_006348	2698	109	fig|243160.12.peg.2698	BMA2627	rplV	LSU ribosomal protein L22p (L17e)	1	0.991	bi (<->)	LAUA01000004	2711	109	fig|95486.65.peg.2711	WQ49_12340		LSU ribosomal protein L22p (L17e)	1	0.991	bi (<->)	NC_010084	382	109	fig|395019.8.peg.382	Bmul_0254	rplV	LSU ribosomal protein L22p (L17e)	1	0.991	bi (<->)	CP104982	730	110	fig|652611.54.peg.730
NC_006350	3662	91	fig|272560.6.peg.3662	BPSL3209	rpsS	PLF_32008_00000569	PGF_00049860	SSU ribosomal protein S19p (S15e)	3806089	3806364	-	Cytoplasmic			bi (<->)	NC_006348	2699	91	fig|243160.12.peg.2699	BMA2628	rpsS	SSU ribosomal protein S19p (S15e)	1	0.989	bi (<->)	LAUA01000004	2712	91	fig|95486.65.peg.2712	WQ49_12345		SSU ribosomal protein S19p (S15e)	1	0.989	bi (<->)	NC_010084	381	91	fig|395019.8.peg.381	Bmul_0253	rpsS	SSU ribosomal protein S19p (S15e)	1	0.989	bi (<->)	CP104982	729	91	fig|652611.54.peg.729
NC_006350	3664	104	fig|272560.6.peg.3664	BPSL3211	rplW	PLF_32008_00000647	PGF_03990071	LSU ribosomal protein L23p (L23Ae)	3807205	3807519	-	Cytoplasmic			bi (<->)	NC_006348	2701	104	fig|243160.12.peg.2701	BMA2630	rplW	LSU ribosomal protein L23p (L23Ae)	1	0.99	bi (<->)	LAUA01000004	2714	104	fig|95486.65.peg.2714	WQ49_12355	rplW	LSU ribosomal protein L23p (L23Ae)	1	0.99	bi (<->)	NC_010084	379	104	fig|395019.8.peg.379	Bmul_0251	rplW	LSU ribosomal protein L23p (L23Ae)	1	0.99	bi (<->)	CP104982	727	99	fig|652611.54.peg.727
NC_006350	3667	103	fig|272560.6.peg.3667	BPSL3214	rpsJ	PLF_32008_00000567	PGF_00049828	SSU ribosomal protein S10p (S20e)	3808983	3809294	-	Cytoplasmic			bi (<->)	NC_006348	2704	103	fig|243160.12.peg.2704	BMA2633	rpsJ	SSU ribosomal protein S10p (S20e)	1	0.99	bi (<->)	LAUA01000004	2717	103	fig|95486.65.peg.2717	WQ49_12370	nusE	SSU ribosomal protein S10p (S20e)	1	0.99	bi (<->)	NC_010084	376	103	fig|395019.8.peg.376	Bmul_0248	rpsJ	SSU ribosomal protein S10p (S20e)	1	0.99	bi (<->)	CP104982	724	103	fig|652611.54.peg.724
NC_006351	4220	164	fig|272560.6.peg.4220	BPSS0254		PLF_32008_00004218	PGF_01724713	Ribose-5-phosphate isomerase B (EC 5.3.1.6)	341809	342303	-	Cytoplasmic			bi (<->)	NC_006349	5414	164	fig|243160.12.peg.5414	BMAA1815	rpiB	Ribose-5-phosphate isomerase B (EC 5.3.1.6)	1	0.994
NC_006351	4228	157	fig|272560.6.peg.4228	BPSS0262		PLF_32008_00005281	PGF_02160099	Aminoglycoside N(6')-acetyltransferase (EC 2.3.1.82) => AAC(6')-Ic,f,g,h,j,k,l,r-z	349788	350261	-	Cytoplasmic			bi (<->)	NC_006349	5406	157	fig|243160.12.peg.5406	BMAA1807		Aminoglycoside N(6')-acetyltransferase (EC 2.3.1.82) => AAC(6')-Ic,f,g,h,j,k,l,r-z	1	0.994
NC_006351	4295	172	fig|272560.6.peg.4295	BPSS0310		PLF_32008_00004345	PGF_02718005	hypothetical protein	428238	428756	-	Cytoplasmic			bi (<->)	NC_006349	5016	172	fig|243160.12.peg.5016	BMAA1447		hypothetical protein	1	0.994
NC_006351	4307	247	fig|272560.6.peg.4307	BPSS0318		PLF_32008_00003200	PGF_12712275	hypothetical protein	445815	446558	-	Cytoplasmic			bi (<->)	NC_006349	5004	247	fig|243160.12.peg.5004	BMAA1435		hypothetical protein	1	0.996
NC_006351	4907	235	fig|272560.6.peg.4907	BPSS0825		PLF_32008_00004543	PGF_00021730	Mlr1181 protein	1110581	1111288	-	Cytoplasmic			bi (<->)	NC_006349	4202	235	fig|243160.12.peg.4202	BMAA0691		Mlr1181 protein	1	0.996
NC_006351	4908	378	fig|272560.6.peg.4908	BPSS0826		PLF_32008_00004501	PGF_12901151	Cysteine desulfurase (EC 2.8.1.7)	1111321	1112457	+	Cytoplasmic			bi (<->)	NC_006349	4203	378	fig|243160.12.peg.4203	BMAA0692		Cysteine desulfurase (EC 2.8.1.7)	1	0.997																					bi (<->)	CP104982	2808	427	fig|652611.54.peg.2808
NC_006351	5121	519	fig|272560.6.peg.5121	BPSS0995		PLF_32008_00004758	PGF_10356643	Transcriptional regulator, AraC family	1314324	1315883	-	Cytoplasmic			bi (<->)	NC_006349	4774	519	fig|243160.12.peg.4774	BMAA1221		Transcriptional regulator, AraC family	1	0.998
NC_006351	5476	432	fig|272560.6.peg.5476	BPSS1278		PLF_32008_00005224	PGF_08225224	hypothetical protein	1745502	1746800	-	Cytoplasmic			bi (<->)	NC_006349	4539	432	fig|243160.12.peg.4539	BMAA1008		hypothetical protein	1	0.998
NC_006351	5533	267	fig|272560.6.peg.5533	BPSS1320		PLF_32008_00004528	PGF_08225224	hypothetical protein	1807779	1808582	-	Cytoplasmic			bi (<->)	NC_006349	4477	267	fig|243160.12.peg.4477	BMAA0957		hypothetical protein	1	0.996
NC_006351	5734	280	fig|272560.6.peg.5734	BPSS1485		PLF_32008_00003615	PGF_00055402	TIM-barrel signal transduction protein	2025400	2026242	+	Cytoplasmic			bi (<->)	NC_006349	4278	280	fig|243160.12.peg.4278	BMAA0757		TIM-barrel signal transduction protein	1	0.996
NC_006351	5776	147	fig|272560.6.peg.5776	BPSS1521		PLF_32008_00004285	PGF_01075722	hypothetical protein	2073665	2074108	-	Cytoplasmic			bi (<->)	NC_006349	5093	147	fig|243160.12.peg.5093	BMAA1518		hypothetical protein	1	0.993
NC_006351	5778	151	fig|272560.6.peg.5778	BPSS1523	bicP	PLF_32008_00143744	PGF_00131873	hypothetical protein	2075253	2075708	-	Cytoplasmic			bi (<->)	NC_006349	5095	151	fig|243160.12.peg.5095	BMAA1520	bicP	hypothetical protein	1	0.993
NC_006351	5790	171	fig|272560.6.peg.5790	BPSS1533	bicA	PLF_32008_00003857	PGF_00063485	Chaperone protein SicA (Salmonella invasin chaperone)	2087441	2087956	-	Cytoplasmic			bi (<->)	NC_006349	5108	171	fig|243160.12.peg.5108	BMAA1532	bicA	Chaperone protein SicA (Salmonella invasin chaperone)	1	0.994																					bi (<->)	CP104982	3535	168	fig|652611.54.peg.3535
NC_006351	5799	135	fig|272560.6.peg.5799	BPSS1542	bsaR	PLF_32008_00004111	PGF_01074805	Type III secretion system protein BsaR	2095059	2095466	-	Cytoplasmic			bi (<->)	NC_006349	5117	135	fig|243160.12.peg.5117	BMAA1541	bsaR	Type III secretion system protein BsaR	1	0.993
NC_006351	5948	163	fig|272560.6.peg.5948	BPSS1658		PLF_32008_00003875	PGF_01074304	hypothetical protein	2280206	2280697	+	Cytoplasmic			bi (<->)	NC_006349	5267	163	fig|243160.12.peg.5267	BMAA1673		hypothetical protein	1	0.994
NC_006351	6313	151	fig|272560.6.peg.6313	BPSS1952		PLF_32008_00003934	PGF_00943961	Sodium-transporting ATPase subunit C	2637651	2638106	-	Cytoplasmic			bi (<->)	NC_006349	3618	151	fig|243160.12.peg.3618	BMAA0124	atpC-2	Sodium-transporting ATPase subunit C	1	0.993
NC_006351	6342	149	fig|272560.6.peg.6342	BPSS1972		PLF_32008_00280645	PGF_04372817	hypothetical protein	2663739	2664188	+	Cytoplasmic			bi (<->)	NC_006349	3587	149	fig|243160.12.peg.3587	BMAA0096		hypothetical protein	1	0.993
NC_006351	6510	49	fig|272560.6.peg.6510	BPSS2118		PLF_32008_00001632	PGF_00048385	Rhodanese-related sulfurtransferase	2867429	2867578	-	Cytoplasmic			bi (<->)	NC_006349	3878	49	fig|243160.12.peg.3878	BMAA0382		Rhodanese-related sulfurtransferase	1	0.98
NC_006351	6719	146	fig|272560.6.peg.6719	BPSS2274		PLF_32008_00003552	PGF_08225224	hypothetical protein	3056541	3056981	+	Cytoplasmic			bi (<->)	NC_006349	5642	146	fig|243160.12.peg.5642	BMAA2017		hypothetical protein	1	0.993
NC_006350	326	167	fig|272560.6.peg.326	BPSL0299		PLF_32008_00003966	PGF_01074372	putative membrane protein	316303	316806	+	CytoplasmicMembrane			bi (<->)	NC_006348	3449	167	fig|243160.12.peg.3449	BMA3363.1		putative membrane protein	1	0.994
NC_006350	334	282	fig|272560.6.peg.334	BPSL0304		PLF_32008_00002868	PGF_05672678	Beta-propeller domains of methanol dehydrogenase type	322508	323356	+	CytoplasmicMembrane			bi (<->)	NC_006348	3457	282	fig|243160.12.peg.3457	BMA3371		Beta-propeller domains of methanol dehydrogenase type	1	0.996																					bi (<->)	CP104982	575	341	fig|652611.54.peg.575
NC_006350	469	113	fig|272560.6.peg.469	BPSL0417		PLF_32008_00004768	PGF_08057665	putative membrane protein	451783	452124	+	CytoplasmicMembrane			bi (<->)	NC_006348	3315	113	fig|243160.12.peg.3315	BMA3236		putative membrane protein	1	0.991
NC_006350	1770	134	fig|272560.6.peg.1770	BPSL1573		PLF_32008_00004417	PGF_08161188	putative membrane protein	1829120	1829524	-	CytoplasmicMembrane			bi (<->)	NC_006348	995	124	fig|243160.12.peg.995	BMA0959		putative membrane protein	1	0.992
NC_006350	2685	159	fig|272560.6.peg.2685	BPSL2360		PLF_32008_00003772	PGF_01073708	Putative lipid carrier protein	2853220	2853699	-	CytoplasmicMembrane			bi (<->)	NC_006348	645	159	fig|243160.12.peg.645			Putative lipid carrier protein	1	0.994																					bi (<->)	CP104982	1086	171	fig|652611.54.peg.1086
NC_006350	2988	165	fig|272560.6.peg.2988	BPSL2621		PLF_32008_00020030	PGF_06928934	hypothetical protein	3143663	3144160	+	CytoplasmicMembrane			bi (<->)	NC_006348	2208	165	fig|243160.12.peg.2208			hypothetical protein	1	0.994
NC_006350	3053	412	fig|272560.6.peg.3053	BPSL2680	wbiA	PLF_32008_00005161	PGF_00125360	hypothetical protein	3207116	3208354	-	CytoplasmicMembrane			bi (<->)	NC_006348	2051	412	fig|243160.12.peg.2051	BMA1984		hypothetical protein	1	0.998
NC_006350	3267	54	fig|272560.6.peg.3267	BPSL2864		PLF_32008_00005295	PGF_08144798	hypothetical protein	3425136	3425300	-	CytoplasmicMembrane			bi (<->)	NC_006348	2467	54	fig|243160.12.peg.2467	BMA2392		hypothetical protein	1	0.981
NC_006350	3856	51	fig|272560.6.peg.3856	BPSL3389A		PLF_32008_00003554	PGF_01072251	hypothetical protein	4026017	4026172	+	CytoplasmicMembrane			bi (<->)	NC_006348	3034	51	fig|243160.12.peg.3034	BMA2964		hypothetical protein	1	0.98
NC_006351	3962	385	fig|272560.6.peg.3962	BPSS0051		PLF_32008_00309553	PGF_09996723	Uncharacterized MFS-type transporter	49592	50749	-	CytoplasmicMembrane			bi (<->)	NC_006349	3549	339	fig|243160.12.peg.3549	BMAA0053		Uncharacterized MFS-type transporter	1	0.997
NC_006351	4284	143	fig|272560.6.peg.4284	BPSS0301		PLF_32008_00004239	PGF_01075423	putative lipoprotein	404682	405113	-	CytoplasmicMembrane			bi (<->)	NC_006349	5027	143	fig|243160.12.peg.5027	BMAA1457		putative lipoprotein	1	0.993
NC_006351	4720	100	fig|272560.6.peg.4720	BPSS0674		PLF_32008_00004826	PGF_00811549	hypothetical protein	912765	913067	+	CytoplasmicMembrane			bi (<->)	NC_006349	4702	100	fig|243160.12.peg.4702			hypothetical protein	1	0.99
NC_006351	5099	356	fig|272560.6.peg.5099	BPSS0980		PLF_32008_00003883	PGF_00815739	Uncharacterized integral membrane protein YdaH	1298505	1299575	-	CytoplasmicMembrane			bi (<->)	NC_006349	4795	267	fig|243160.12.peg.4795	BMAA1241		Uncharacterized integral membrane protein YdaH	1	0.996
NC_006351	5113	180	fig|272560.6.peg.5113	BPSS0989		PLF_32008_00003016	PGF_01070225	hypothetical protein	1307541	1308083	-	CytoplasmicMembrane			bi (<->)	NC_006349	4784	180	fig|243160.12.peg.4784	BMAA1229		hypothetical protein	1	0.994
NC_006351	5951	53	fig|272560.6.peg.5951	BPSS1661		PLF_32008_00061285	PGF_08104205	hypothetical protein	2281810	2281971	+	CytoplasmicMembrane			bi (<->)	NC_006349	5270	53	fig|243160.12.peg.5270	BMAA1676		hypothetical protein	1	0.981
NC_006351	6309	82	fig|272560.6.peg.6309	BPSS1948	atpE	PLF_32008_00002898	PGF_00053398	Sodium-transporting ATPase subunit E	2635910	2636158	-	CytoplasmicMembrane			bi (<->)	NC_006349	3622	82	fig|243160.12.peg.3622	BMAA0128	atpE-2	Sodium-transporting ATPase subunit E	1	0.988																					uni (->)	CP104982	6118	85	fig|652611.54.peg.6118
NC_006351	6311	102	fig|272560.6.peg.6311	BPSS1950		PLF_32008_00004319	PGF_01075955	Sodium-transporting ATPase subunit R	2636853	2637161	-	CytoplasmicMembrane			bi (<->)	NC_006349	3620	106	fig|243160.12.peg.3620	BMAA0126		Sodium-transporting ATPase subunit R	1	0.953
NC_006351	4501	365	fig|272560.6.peg.4501	BPSS0493		PLF_32008_00003455	PGF_01071927	Chitin-binding protein	670272	671369	-	Extracellular			bi (<->)	NC_006349	5384	408	fig|243160.12.peg.5384	BMAA1785		Chitin-binding protein	1	0.892																					bi (<->)	CP104982	4452	389	fig|652611.54.peg.4452
NC_006351	5786	310	fig|272560.6.peg.5786	BPSS1529	bipD	PLF_32008_00003858	PGF_10551117	Type III secretion host injection protein (YopB)	2082841	2083773	-	Extracellular			bi (<->)	NC_006349	5104	310	fig|243160.12.peg.5104	BMAA1528	bprD	Type III secretion host injection protein (YopB)	1	0.997
NC_006351	5789	620	fig|272560.6.peg.5789	BPSS1532	bipB	PLF_32008_00003950	PGF_00069649	Cell invasion protein SipB	2085560	2087422	-	Extracellular			bi (<->)	NC_006349	5107	620	fig|243160.12.peg.5107	BMAA1531	bipB	Cell invasion protein SipB	1	0.998
NC_006351	5887	207	fig|272560.6.peg.5887	BPSS1606		PLF_32008_00004050	PGF_01106212	hypothetical protein	2182607	2183230	-	Extracellular			bi (<->)	NC_006349	5202	207	fig|243160.12.peg.5202	BMAA1616		hypothetical protein	1	0.995
NC_006350	3181	390	fig|272560.6.peg.3181	BPSL2785		PLF_32008_00004526	PGF_08225224	hypothetical protein	3324839	3326011	+	Periplasmic			bi (<->)	NC_006348	2352	146	fig|243160.12.peg.2352			hypothetical protein	1	0.993
NC_006350	3250	331	fig|272560.6.peg.3250	BPSL2849	phnD	PLF_32008_00002913	PGF_00033852	Phosphonate ABC transporter substrate-binding protein PhnD (TC 3.A.1.9.1)	3411269	3412264	-	Periplasmic			bi (<->)	NC_006348	2483	227	fig|243160.12.peg.2483			Phosphonate ABC transporter substrate-binding protein PhnD (TC 3.A.1.9.1)	1	0.996																					bi (<->)	CP104982	1659	334	fig|652611.54.peg.1659
NC_006351	5697	206	fig|272560.6.peg.5697	BPSS1456		PLF_32008_00041518	PGF_08225224	hypothetical protein	1986772	1987392	+	Periplasmic			bi (<->)	NC_006349	4314	210	fig|243160.12.peg.4314			hypothetical protein	1	0.976
NC_006351	5788	421	fig|272560.6.peg.5788	BPSS1531	bipC	PLF_32008_00004622	PGF_08225224	hypothetical protein	2084259	2085524	-	Periplasmic			bi (<->)	NC_006349	5106	421	fig|243160.12.peg.5106	BMAA1530	bipC	hypothetical protein	1	0.998
NC_006350	53	419	fig|272560.6.peg.53	BPSL0050		PLF_32008_00003955	PGF_00412288	ABC transporter, substrate-binding protein (cluster 4, leucine/isoleucine/valine/benzoate)	54123	55382	-	Unknown			bi (<->)	NC_006348	2733	419	fig|243160.12.peg.2733	BMA2665		ABC transporter, substrate-binding protein (cluster 4, leucine/isoleucine/valine/benzoate)	1	0.998
NC_006350	125	160	fig|272560.6.peg.125	BPSL0113		PLF_32008_00004672	PGF_08225224	hypothetical protein	124780	125262	-	Unknown			bi (<->)	NC_006348	129	88	fig|243160.12.peg.129	BMA0130		hypothetical protein	1	0.989
NC_006350	285	73	fig|272560.6.peg.285	BPSL0266		PLF_32008_00002194	PGF_00047076	RebB protein	279104	279325	-	Unknown			bi (<->)	NC_006348	3405	73	fig|243160.12.peg.3405	BMA3319		RebB protein	1	0.986																					bi (<->)	CP104982	2272	106	fig|652611.54.peg.2272
NC_006350	308	114	fig|272560.6.peg.308	BPSL0287		PLF_32008_00002323	PGF_00037937	Protein PhnA	299436	299780	+	Unknown			bi (<->)	NC_006348	3428	114	fig|243160.12.peg.3428	BMA3342		Protein PhnA	1	0.991																					bi (<->)	CP104982	136	113	fig|652611.54.peg.136
NC_006350	327	235	fig|272560.6.peg.327	BPSL0300		PLF_32008_00003550	PGF_12724554	hypothetical protein	316914	317621	+	Unknown			bi (<->)	NC_006348	3450	272	fig|243160.12.peg.3450	BMA3365		hypothetical protein	1	0.86																					bi (<->)	CP104982	4997	241	fig|652611.54.peg.4997
NC_006350	640	127	fig|272560.6.peg.640	BPSL0592		PLF_32008_00003964	PGF_07607458	hypothetical protein	664602	664985	-	Unknown			bi (<->)	NC_006348	11	127	fig|243160.12.peg.11			hypothetical protein	1	0.992
NC_006350	641	145	fig|272560.6.peg.641	BPSL0593		PLF_32008_00003960	PGF_01074367	hypothetical protein	665003	665440	-	Unknown			bi (<->)	NC_006348	12	125	fig|243160.12.peg.12			hypothetical protein	1	0.992
NC_006350	1002	162	fig|272560.6.peg.1002	BPSL0919A		PLF_32008_00005502	PGF_00127286	hypothetical protein	1072632	1073120	+	Unknown			bi (<->)	NC_006348	2290	162	fig|243160.12.peg.2290			hypothetical protein	1	0.994
NC_006350	1128	45	fig|272560.6.peg.1128	BPSL1038a		PLF_32008_00004689	PGF_01078071	hypothetical protein	1208322	1208459	-	Unknown			bi (<->)	NC_006348	774	45	fig|243160.12.peg.774			hypothetical protein	1	0.978
NC_006350	1432	74	fig|272560.6.peg.1432	BPSL1288		PLF_32008_00002157	PGF_08225224	hypothetical protein	1501151	1501375	-	Unknown			bi (<->)	NC_006348	1805	74	fig|243160.12.peg.1805			hypothetical protein	1	0.986
NC_006350	1444	136	fig|272560.6.peg.1444	BPSL1298		PLF_32008_00003551	PGF_08225224	hypothetical protein	1512096	1512506	+	Unknown			bi (<->)	NC_006348	3158	136	fig|243160.12.peg.3158	BMA3079		hypothetical protein	1	0.993
NC_006350	1540	156	fig|272560.6.peg.1540	BPSL1373		PLF_32008_00002489	PGF_08225224	hypothetical protein	1603310	1603780	-	Unknown			bi (<->)	NC_006348	818	135	fig|243160.12.peg.818	BMA0794		hypothetical protein	1	0.993
NC_006350	1602	154	fig|272560.6.peg.1602	BPSL1427		PLF_32008_00004247	PGF_01075473	hypothetical protein	1664742	1665206	-	Unknown			bi (<->)	NC_006348	1476	154	fig|243160.12.peg.1476			hypothetical protein	1	0.994
NC_006350	1742	199	fig|272560.6.peg.1742	BPSL1549		PLF_32008_00004616	PGF_00115561	hypothetical protein	1797528	1798127	-	Unknown			bi (<->)	NC_006348	1340	132	fig|243160.12.peg.1340			hypothetical protein	1	0.992
NC_006350	1789	107	fig|272560.6.peg.1789	BPSL1590		PLF_32008_00004492	PGF_00787057	hypothetical protein	1843714	1844037	-	Unknown			bi (<->)	NC_006348	1013	160	fig|243160.12.peg.1013	BMA0974		hypothetical protein	1	0.662
NC_006350	1805	89	fig|272560.6.peg.1805	BPSL1602		PLF_32008_00005875	PGF_00319160	hypothetical protein	1856701	1856970	-	Unknown			bi (<->)	NC_006348	1029	89	fig|243160.12.peg.1029			hypothetical protein	1	0.989
NC_006350	1822	480	fig|272560.6.peg.1822	BPSL1617		PLF_32008_00004303	PGF_07711962	FIG022199: FAD-binding protein	1874296	1875738	-	Unknown			bi (<->)	NC_006348	1045	480	fig|243160.12.peg.1045	BMA1005		FIG022199: FAD-binding protein	1	0.998
NC_006350	1832	155	fig|272560.6.peg.1832	BPSL1625		PLF_32008_00002795	PGF_08225224	hypothetical protein	1882057	1882524	+	Unknown			bi (<->)	NC_006348	1053	155	fig|243160.12.peg.1053	BMA1015		hypothetical protein	1	0.994
NC_006350	1981	84	fig|272560.6.peg.1981	BPSL1764		PLF_32008_00027610	PGF_01078030	hypothetical protein	2079787	2080041	+	Unknown			bi (<->)	NC_006348	1201	84	fig|243160.12.peg.1201			hypothetical protein	1	0.988
NC_006350	2289	168	fig|272560.6.peg.2289	BPSL2029		PLF_32008_00004027	PGF_00052139	Sigma-fimbriae uncharacterized paralogous subunit	2424837	2425343	-	Unknown			bi (<->)	NC_006348	903	168	fig|243160.12.peg.903			Sigma-fimbriae uncharacterized paralogous subunit	1	0.994																					bi (<->)	CP104982	5167	182	fig|652611.54.peg.5167
NC_006350	2344	72	fig|272560.6.peg.2344	BPSL2072		PLF_32008_00004686	PGF_03063446	hypothetical protein	2479571	2479789	+	Unknown			bi (<->)	NC_006348	855	72	fig|243160.12.peg.855			hypothetical protein	1	0.986
NC_006350	2433	245	fig|272560.6.peg.2433	BPSL2141		PLF_32008_00003702	PGF_00034171	Phytochelatin synthase (EC 2.3.2.15), bacterial type	2569906	2570643	-	Unknown			bi (<->)	NC_006348	1579	245	fig|243160.12.peg.1579	BMA1537		Phytochelatin synthase (EC 2.3.2.15), bacterial type	1	0.996
NC_006350	2809	168	fig|272560.6.peg.2809	BPSL2466		PLF_32008_00125819	PGF_00128445	hypothetical protein	2972515	2973021	-	Unknown			bi (<->)	NC_006348	518	168	fig|243160.12.peg.518			hypothetical protein	1	0.994
NC_006350	2821	122	fig|272560.6.peg.2821	BPSL2474A		PLF_32008_00004677	PGF_01078059	hypothetical protein	2985594	2985962	+	Unknown			bi (<->)	NC_006348	389	49	fig|243160.12.peg.389	BMA0384		hypothetical protein	1	0.98
NC_006350	2837	196	fig|272560.6.peg.2837	BPSL2487		PLF_32008_00004413	PGF_00348162	hypothetical protein	3000900	3001490	+	Unknown			bi (<->)	NC_006348	404	196	fig|243160.12.peg.404	BMA0399		hypothetical protein	1	0.995
NC_006350	2907	86	fig|272560.6.peg.2907	BPSL2547A		PLF_32008_00006066	PGF_02931620	hypothetical protein	3076324	3076584	+	Unknown			bi (<->)	NC_006348	482	86	fig|243160.12.peg.482	BMA0472		hypothetical protein	1	0.988
NC_006350	3146	125	fig|272560.6.peg.3146	BPSL2755		PLF_32008_00004126	PGF_01074872	hypothetical protein	3295270	3295647	-	Unknown			bi (<->)	NC_006348	2142	125	fig|243160.12.peg.2142	BMA2071.1		hypothetical protein	1	0.992
NC_006350	3257	209	fig|272560.6.peg.3257	BPSL2856	phnH	PLF_32008_00026225	PGF_02712817	Alpha-D-ribose 1-methylphosphonate 5-triphosphate synthase subunit PhnH (EC 2.7.8.37)	3418407	3419036	-	Unknown			bi (<->)	NC_006348	2476	209	fig|243160.12.peg.2476	BMA2401	phnH	Alpha-D-ribose 1-methylphosphonate 5-triphosphate synthase subunit PhnH (EC 2.7.8.37)	1	0.99																					bi (<->)	CP104982	1663	209	fig|652611.54.peg.1663
NC_006350	3258	182	fig|272560.6.peg.3258	BPSL2857	phnG	PLF_32008_00002699	PGF_06858669	Alpha-D-ribose 1-methylphosphonate 5-triphosphate synthase subunit PhnG (EC 2.7.8.37)	3419033	3419581	-	Unknown			bi (<->)	NC_006348	2475	182	fig|243160.12.peg.2475	BMA2400	phnG	Alpha-D-ribose 1-methylphosphonate 5-triphosphate synthase subunit PhnG (EC 2.7.8.37)	1	0.995																					bi (<->)	CP104982	1662	152	fig|652611.54.peg.1662
NC_006350	3542	76	fig|272560.6.peg.3542	BPSL3091		PLF_32008_00004448	PGF_00409397	putative membrane protein	3688903	3689133	+	Unknown			bi (<->)	NC_006348	2888	66	fig|243160.12.peg.2888			putative membrane protein	1	0.985
NC_006350	3779	73	fig|272560.6.peg.3779	BPSL3325		PLF_32008_00005022	PGF_00344043	hypothetical protein	3945580	3945801	+	Unknown			bi (<->)	NC_006348	2949	73	fig|243160.12.peg.2949	BMA2879		hypothetical protein	1	0.986
NC_006350	3837	60	fig|272560.6.peg.3837	BPSL3375		PLF_32008_00004869	PGF_01078470	hypothetical protein	4005463	4005645	+	Unknown			bi (<->)	NC_006348	3053	60	fig|243160.12.peg.3053			hypothetical protein	1	0.983
NC_006351	3933	66	fig|272560.6.peg.3933	BPSS0024		PLF_32008_00004059	PGF_08158923	hypothetical protein	23467	23667	+	Unknown			bi (<->)	NC_006349	3519	66	fig|243160.12.peg.3519	BMAA0024		hypothetical protein	1	0.985
NC_006351	3942	76	fig|272560.6.peg.3942	BPSS0033		PLF_32008_00003976	PGF_01074379	hypothetical protein	32110	32340	+	Unknown			bi (<->)	NC_006349	3528	76	fig|243160.12.peg.3528			hypothetical protein	1	0.987
NC_006351	3987	218	fig|272560.6.peg.3987	BPSS0068		PLF_32008_00006815	PGF_08225224	hypothetical protein	78945	79601	+	Unknown			bi (<->)	NC_006349	3574	200	fig|243160.12.peg.3574	BMAA0081		hypothetical protein	1	0.715																					bi (<->)	CP104982	3746	569	fig|652611.54.peg.3746
NC_006351	4161	63	fig|272560.6.peg.4161	BPSS0211		PLF_32008_00003638	PGF_01072708	hypothetical protein	286130	286321	+	Unknown			bi (<->)	NC_006349	5473	63	fig|243160.12.peg.5473	BMAA1865		hypothetical protein	1	0.984
NC_006351	4162	212	fig|272560.6.peg.4162	BPSS0212		PLF_32008_00003555	PGF_08225224	hypothetical protein	286414	287052	+	Unknown			bi (<->)	NC_006349	5472	212	fig|243160.12.peg.5472	BMAA1864		hypothetical protein	1	0.995
NC_006351	4175	147	fig|272560.6.peg.4175	BPSS0223		PLF_32008_00004100	PGF_00040813	Putative exported protein precursor	299703	300146	-	Unknown			bi (<->)	NC_006349	5458	147	fig|243160.12.peg.5458	BMAA1852		Putative exported protein precursor	1	0.993
NC_006351	4181	275	fig|272560.6.peg.4181	BPSS0225		PLF_32008_00005499	PGF_08225224	hypothetical protein	304350	305177	+	Unknown			bi (<->)	NC_006349	5456	369	fig|243160.12.peg.5456	BMAA1849		hypothetical protein	1	0.743																					bi (<->)	CP104982	4174	111	fig|652611.54.peg.4174
NC_006351	4532	143	fig|272560.6.peg.4532	BPSS0519		PLF_32008_00003495	PGF_12886365	T6SS lysozyme-like component TssE	705895	706326	+	Unknown			bi (<->)	NC_006349	3940	143	fig|243160.12.peg.3940	BMAA0441		T6SS lysozyme-like component TssE	1	0.993
NC_006351	4541	129	fig|272560.6.peg.4541	BPSS0528		PLF_32008_00003662	PGF_00419131	hypothetical protein	720849	721238	+	Unknown			bi (<->)	NC_006349	3950	120	fig|243160.12.peg.3950	BMAA0450		hypothetical protein	1	0.992
NC_006351	4546	119	fig|272560.6.peg.4546	BPSS0533		PLF_32008_00003642	PGF_00302898	hypothetical protein	728495	728854	+	Unknown			bi (<->)	NC_006349	3956	119	fig|243160.12.peg.3956	BMAA0455		hypothetical protein	1	0.992
NC_006351	4547	97	fig|272560.6.peg.4547	BPSS0534		PLF_32008_00004232	PGF_01075383	hypothetical protein	729009	729302	+	Unknown			bi (<->)	NC_006349	3957	97	fig|243160.12.peg.3957			hypothetical protein	1	0.99
NC_006351	4730	132	fig|272560.6.peg.4730	BPSS0682		PLF_32008_00003368	PGF_01114510	hypothetical protein	922851	923249	+	Unknown			bi (<->)	NC_006349	4690	132	fig|243160.12.peg.4690	BMAA1151		hypothetical protein	1	0.992
NC_006351	4834	107	fig|272560.6.peg.4834	BPSS0767		PLF_32008_00003873	PGF_01074303	hypothetical protein	1029559	1029882	-	Unknown			bi (<->)	NC_006349	4116	120	fig|243160.12.peg.4116	BMAA0609		hypothetical protein	1	0.883
NC_006351	4841	52	fig|272560.6.peg.4841	BPSS0771		PLF_32008_00004421	PGF_00319458	hypothetical protein	1033808	1033966	+	Unknown			bi (<->)	NC_006349	4125	52	fig|243160.12.peg.4125	BMAA0618		hypothetical protein	1	0.981
NC_006351	4862	106	fig|272560.6.peg.4862	BPSS0789		PLF_32008_00004184	PGF_12953999	hypothetical protein	1055298	1055618	+	Unknown			bi (<->)	NC_006349	4148	106	fig|243160.12.peg.4148			hypothetical protein	1	0.991
NC_006351	4869	106	fig|272560.6.peg.4869	BPSS0795		PLF_32008_00002930	PGF_00016106	L-fucose mutarotase, type 2 (EC 5.1.3.29)	1060885	1061205	+	Unknown			bi (<->)	NC_006349	4156	106	fig|243160.12.peg.4156	BMAA0645		L-fucose mutarotase, type 2 (EC 5.1.3.29)	1	0.991
NC_006351	4877	145	fig|272560.6.peg.4877	BPSS0801		PLF_32008_00004055	PGF_08225224	hypothetical protein	1073860	1074297	+	Unknown			bi (<->)	NC_006349	4167	145	fig|243160.12.peg.4167	BMAA0659		hypothetical protein	1	0.993																					bi (<->)	CP104982	3399	145	fig|652611.54.peg.3399
NC_006351	4901	144	fig|272560.6.peg.4901	BPSS0819		PLF_32008_00004678	PGF_08225224	hypothetical protein	1103664	1104098	+	Unknown			bi (<->)	NC_006349	4189	156	fig|243160.12.peg.4189	BMAA0685		hypothetical protein	1	0.917
NC_006351	4905	537	fig|272560.6.peg.4905	BPSS0823		PLF_32008_00004334	PGF_00146174	hypothetical protein	1108118	1109731	+	Unknown			bi (<->)	NC_006349	4200	537	fig|243160.12.peg.4200	BMAA0689		hypothetical protein	1	0.998
NC_006351	4960	228	fig|272560.6.peg.4960	BPSS0862		PLF_32008_00004278	PGF_00056805	Thioredoxin-like protein clustered with PA0057	1154178	1154864	+	Unknown			bi (<->)	NC_006349	4932	228	fig|243160.12.peg.4932	BMAA1372		Thioredoxin-like protein clustered with PA0057	1	0.996																					bi (<->)	CP104982	64	234	fig|652611.54.peg.64
NC_006351	5015	74	fig|272560.6.peg.5015	BPSS0914		PLF_32008_00004452	PGF_08180023	hypothetical protein	1208622	1208846	-	Unknown			bi (<->)	NC_006349	4874	74	fig|243160.12.peg.4874			hypothetical protein	1	0.986
NC_006351	5125	79	fig|272560.6.peg.5125	BPSS0999		PLF_32008_00004569	PGF_01077999	Polyketide biosynthesis acyl-carrier-protein AcpK	1320172	1320411	-	Unknown			bi (<->)	NC_006349	4770	79	fig|243160.12.peg.4770	BMAA1217		Polyketide biosynthesis acyl-carrier-protein AcpK	1	0.987
NC_006351	5129	77	fig|272560.6.peg.5129	BPSS1003		PLF_32008_00004675	PGF_01078057	hypothetical protein	1323383	1323616	-	Unknown			bi (<->)	NC_006349	4764	112	fig|243160.12.peg.4764	BMAA1211		hypothetical protein	1	0.679
NC_006351	5151	47	fig|272560.6.peg.5151	BPSS1021		PLF_32008_00004863	PGF_01078438	putative lipoprotein	1395402	1395545	+	Unknown			bi (<->)	NC_006349	4730	47	fig|243160.12.peg.4730	BMAA1188		putative lipoprotein	1	0.979
NC_006351	5156	75	fig|272560.6.peg.5156	BPSS1026		PLF_32008_00005723	PGF_08225224	hypothetical protein	1398354	1398581	+	Unknown			bi (<->)	NC_006349	4725	75	fig|243160.12.peg.4725			hypothetical protein	1	0.987
NC_006351	5178	51	fig|272560.6.peg.5178	BPSS1044		PLF_32008_00003563	PGF_03101178	hypothetical protein	1424167	1424322	-	Unknown			bi (<->)	NC_006349	4562	51	fig|243160.12.peg.4562			hypothetical protein	1	0.98
NC_006351	5408	156	fig|272560.6.peg.5408	BPSS1231		PLF_32008_00004142	PGF_00001016	FIG00919029: hypothetical protein	1663300	1663770	-	Unknown			bi (<->)	NC_006349	4604	156	fig|243160.12.peg.4604	BMAA1071		FIG00919029: hypothetical protein	1	0.994
NC_006351	5465	81	fig|272560.6.peg.5465	BPSS1271		PLF_32008_00005074	PGF_00033879	Phosphopantetheine attachment site domain protein	1735403	1735648	-	Unknown			bi (<->)	NC_006349	4549	81	fig|243160.12.peg.4549	BMAA1019		Phosphopantetheine attachment site domain protein	1	0.988
NC_006351	5477	238	fig|272560.6.peg.5477	BPSS1278a		PLF_32008_00005286	PGF_10303806	Transcriptional regulator, AcrR family	1746879	1747595	+	Unknown			bi (<->)	NC_006349	4538	238	fig|243160.12.peg.4538	BMAA1007		Transcriptional regulator, AcrR family	1	0.996																					uni (->)	CP104982	2931	196	fig|652611.54.peg.2931
NC_006351	5507	223	fig|272560.6.peg.5507	BPSS1298		PLF_32008_00004718	PGF_00193417	hypothetical protein	1778359	1779030	+	Unknown			bi (<->)	NC_006349	4504	223	fig|243160.12.peg.4504			hypothetical protein	1	0.996
NC_006351	5550	70	fig|272560.6.peg.5550	BPSS1335		PLF_32008_00003640	PGF_01930437	hypothetical protein	1827019	1827231	+	Unknown			bi (<->)	NC_006349	4458	70	fig|243160.12.peg.4458	BMAA0942		hypothetical protein	1	0.986																					bi (<->)	CP104982	212	70	fig|652611.54.peg.212
NC_006351	5646	217	fig|272560.6.peg.5646	BPSS1413		PLF_32008_00003806	PGF_00810498	HAD superfamily hydrolase	1925626	1926279	-	Unknown			bi (<->)	NC_006349	4087	204	fig|243160.12.peg.4087	BMAA0579		HAD superfamily hydrolase	1	0.995
NC_006351	5704	147	fig|272560.6.peg.5704	BPSS1462		PLF_32008_00005260	PGF_07058854	Uncharacterized protein Reut_B5167	1994132	1994575	+	Unknown			bi (<->)	NC_006349	4306	147	fig|243160.12.peg.4306	BMAA0783		Uncharacterized protein Reut_B5167	1	0.993
NC_006351	5705	155	fig|272560.6.peg.5705	BPSS1463		PLF_32008_00003995	PGF_00872427	Uncharacterized protein Reut_B5166	1995364	1995831	+	Unknown			bi (<->)	NC_006349	4305	155	fig|243160.12.peg.4305	BMAA0782		Uncharacterized protein Reut_B5166	1	0.994
NC_006351	5735	146	fig|272560.6.peg.5735	BPSS1486		PLF_32008_00003878	PGF_01074306	hypothetical protein	2026288	2026728	+	Unknown			bi (<->)	NC_006349	4277	146	fig|243160.12.peg.4277	BMAA0756		hypothetical protein	1	0.993
NC_006351	5761	130	fig|272560.6.peg.5761	BPSS1507		PLF_32008_00003899	PGF_08225224	hypothetical protein	2057407	2057799	+	Unknown			bi (<->)	NC_006349	4250	130	fig|243160.12.peg.4250	BMAA0734		hypothetical protein	1	0.992
NC_006351	5772	152	fig|272560.6.peg.5772	BPSS1517		PLF_32008_00005896	PGF_01085466	hypothetical protein	2070325	2070783	-	Unknown			bi (<->)	NC_006349	5090	152	fig|243160.12.peg.5090	BMAA1515		hypothetical protein	1	0.993
NC_006351	5875	159	fig|272560.6.peg.5875	BPSS1594		PLF_32008_00004952	PGF_00259583	hypothetical protein	2169229	2169708	-	Unknown			bi (<->)	NC_006349	5190	159	fig|243160.12.peg.5190	BMAA1604		hypothetical protein	1	0.994																					bi (<->)	CP104982	4974	145	fig|652611.54.peg.4974
NC_006351	5879	166	fig|272560.6.peg.5879	BPSS1598		PLF_32008_00004811	PGF_10337742	hypothetical protein	2173008	2173508	-	Unknown			bi (<->)	NC_006349	5194	166	fig|243160.12.peg.5194	BMAA1608		hypothetical protein	1	0.994
NC_006351	5880	432	fig|272560.6.peg.5880	BPSS1599	pilO	PLF_32008_00003450	PGF_00411357	putative type IV pilus biosynthesis protein	2173522	2174820	-	Unknown			bi (<->)	NC_006349	5195	432	fig|243160.12.peg.5195	BMAA1609		putative type IV pilus biosynthesis protein	1	0.998																					bi (<->)	CP104982	4967	441	fig|652611.54.peg.4967
NC_006351	5896	60	fig|272560.6.peg.5896	BPSS1612		PLF_32008_00004766	PGF_08180785	hypothetical protein	2188778	2188960	-	Unknown			bi (<->)	NC_006349	5212	60	fig|243160.12.peg.5212	BMAA1623		hypothetical protein	1	0.983
NC_006351	5897	83	fig|272560.6.peg.5897	BPSS1613		PLF_32008_00004647	PGF_01078041	HrpD6 protein	2189128	2189379	-	Unknown			bi (<->)	NC_006349	5213	83	fig|243160.12.peg.5213	BMAA1624		HrpD6 protein	1	0.988
NC_006351	5903	203	fig|272560.6.peg.5903	BPSS1619		PLF_32008_00005757	PGF_06833705	Type III secretion inner membrane protein (YscQ,homologous to flagellar export components)	2193709	2194320	-	Unknown			bi (<->)	NC_006349	5219	120	fig|243160.12.peg.5219			HpaP protein; Type III secretion protein (YscP)	1	0.55
NC_006351	5907	138	fig|272560.6.peg.5907	BPSS1623		PLF_32008_00136443	PGF_01074800	Type III secretion protein HrpB2	2198299	2198715	+	Unknown			bi (<->)	NC_006349	5223	138	fig|243160.12.peg.5223	BMAA1633		Type III secretion protein HrpB2	1	0.993
NC_006351	6308	249	fig|272560.6.peg.6308	BPSS1947		PLF_32008_00172357	PGF_00796327	Sodium-transporting ATPase subunit F	2635147	2635896	-	Unknown			bi (<->)	NC_006349	3623	249	fig|243160.12.peg.3623	BMAA0129		Sodium-transporting ATPase subunit F	1	0.996
NC_006351	6327	59	fig|272560.6.peg.6327	BPSS1961		PLF_32008_00004248	PGF_08171700	hypothetical protein	2650594	2650773	+	Unknown			bi (<->)	NC_006349	3603	59	fig|243160.12.peg.3603			hypothetical protein	1	0.983
NC_006351	6350	442	fig|272560.6.peg.6350	BPSS1977		PLF_32008_00003026	PGF_04956290	hypothetical protein	2673158	2674486	+	Unknown			bi (<->)	NC_006349	3579	442	fig|243160.12.peg.3579	BMAA0086		hypothetical protein	1	0.998																					bi (<->)	CP104982	2965	442	fig|652611.54.peg.2965
NC_006351	6497	177	fig|272560.6.peg.6497	BPSS2108		PLF_32008_00003279	PGF_10526396	putative lipoprotein	2854970	2855503	+	Unknown			bi (<->)	NC_006349	3893	116	fig|243160.12.peg.3893	BMAA0394		putative lipoprotein	1	0.991
NC_006351	6509	40	fig|272560.6.peg.6509	BPSS2117A		PLF_32008_00005149	PGF_01080021	Gll2745 protein	2866651	2866773	-	Unknown			bi (<->)	NC_006349	3879	40	fig|243160.12.peg.3879	BMAA0384		Gll2745 protein	1	0.975
NC_006351	6575	522	fig|272560.6.peg.6575	BPSS2166		PLF_32008_00004360	PGF_00044325	Putative tail fiber protein	2929017	2930585	+	Unknown			bi (<->)	NC_006349	5577	484	fig|243160.12.peg.5577			Putative tail fiber protein	1	0.339
NC_006351	6763	107	fig|272560.6.peg.6763	BPSS2308		PLF_32008_00004496	PGF_08225224	hypothetical protein	3110107	3110430	+	Unknown			bi (<->)	NC_006349	5686	107	fig|243160.12.peg.5686			hypothetical protein	1	0.991
NC_006351	5577	1125	fig|272560.6.peg.5577	BPSS1356		PLF_32008_00003749	PGF_03012484	hypothetical protein	1853417	1856794	+	Cytoplasmic	Y		bi (<->)	NC_006349	4428	1125	fig|243160.12.peg.4428	BMAA0912		hypothetical protein	0.999	0.999
NC_006351	4538	738	fig|272560.6.peg.4538	BPSS0525		PLF_32008_00003597	PGF_10538468	Pentapeptide repeat family protein	716801	719017	+	Cytoplasmic			bi (<->)	NC_006349	3947	738	fig|243160.12.peg.3947	BMAA0447		Pentapeptide repeat family protein	0.999	0.999
NC_006350	635	1088	fig|272560.6.peg.635	BPSL0591		PLF_32008_00003744	PGF_01073472	hypothetical protein	660133	663399	-	CytoplasmicMembrane			bi (<->)	NC_006348	9	1088	fig|243160.12.peg.9	BMA0010		hypothetical protein	0.999	0.999
NC_006350	2675	762	fig|272560.6.peg.2675	BPSL2351		PLF_32008_00003389	PGF_00025784	Nitric-oxide reductase (EC 1.7.99.7), quinol-dependent	2843904	2846192	+	CytoplasmicMembrane			bi (<->)	NC_006348	654	762	fig|243160.12.peg.654	BMA0633		Nitric-oxide reductase (EC 1.7.99.7), quinol-dependent	0.999	0.999																					uni (->)	CP104982	561	465	fig|652611.54.peg.561
NC_006350	1810	691	fig|272560.6.peg.1810	BPSL1607	nosZ	PLF_32008_00004311	PGF_00026089	Nitrous-oxide reductase (EC 1.7.99.6)	1860683	1862758	-	Periplasmic			bi (<->)	NC_006348	1034	691	fig|243160.12.peg.1034	BMA0995	nosZ	Nitrous-oxide reductase (EC 1.7.99.6)	0.999	0.999																					bi (<->)	CP104982	1650	636	fig|652611.54.peg.1650
NC_006351	4151	670	fig|272560.6.peg.4151	BPSS0203		PLF_32008_00004007	PGF_01074468	Large exoproteins involved in heme utilization or adhesion	271227	273239	-	Unknown			bi (<->)	NC_006349	5486	670	fig|243160.12.peg.5486	BMAA1874		Large exoproteins involved in heme utilization or adhesion	0.999	0.999
NC_006351	5936	806	fig|272560.6.peg.5936	BPSS1649		PLF_32008_00004350	PGF_00007110	Galactose oxidase precursor (EC 1.1.3.9)	2266833	2269253	+	Unknown			bi (<->)	NC_006349	5253	806	fig|243160.12.peg.5253	BMAA1664		Galactose oxidase precursor (EC 1.1.3.9)	0.999	0.999
NC_006350	2372	244	fig|272560.6.peg.2372	BPSL2094	ompR	PLF_32008_00000849	PGF_00414228	Two-component system response regulator OmpR	2514185	2514919	+	Cytoplasmic			bi (<->)	NC_006348	1527	244	fig|243160.12.peg.1527	BMA1485	ompR	Two-component system response regulator OmpR	1	0.996	bi (<->)	LAUA01000017	6470	244	fig|95486.65.peg.6470	WQ49_29655		Two-component system response regulator OmpR	0.996	0.996	bi (<->)	NC_010084	1520	241	fig|395019.8.peg.1520	Bmul_1333	ompR	Two-component system response regulator OmpR	1	0.996	bi (<->)	CP104982	5747	247	fig|652611.54.peg.5747
NC_006350	2530	466	fig|272560.6.peg.2530	BPSL2230		PLF_32008_00003630	PGF_08225224	hypothetical protein	2682440	2683840	-	Cytoplasmic			bi (<->)	NC_006348	1678	466	fig|243160.12.peg.1678	BMA1636		hypothetical protein	0.998	0.998
NC_006350	2825	493	fig|272560.6.peg.2825	BPSL2477		PLF_32008_00000003	PGF_04444701	Transposase, IS4	2990162	2991643	+	Cytoplasmic			uni (->)	NC_006348	1547	493	fig|243160.12.peg.1547	BMA1503		Transposase, IS4	0.998	0.998
NC_006350	3429	487	fig|272560.6.peg.3429	BPSL3001		PLF_32008_00000003	PGF_04444701	Transposase, IS4	3577395	3578858	-	Cytoplasmic			uni (->)	NC_006348	746	515	fig|243160.12.peg.746	BMA0728		Transposase, IS4	0.998	0.944
NC_006351	4759	487	fig|272560.6.peg.4759	BPSS0709		PLF_32008_00000003	PGF_04444701	Transposase, IS4	954456	955919	+	Cytoplasmic			uni (->)	NC_006349	3669	538	fig|243160.12.peg.3669	BMAA0170		Transposase, IS4	0.998	0.903
NC_006351	4889	437	fig|272560.6.peg.4889	BPSS0812		PLF_32008_00003953	PGF_10310575	hypothetical protein	1086995	1088308	-	Cytoplasmic			bi (<->)	NC_006349	4178	460	fig|243160.12.peg.4178	BMAA0673		hypothetical protein	0.998	0.948
NC_006351	5276	565	fig|272560.6.peg.5276	BPSS1122		PLF_32008_00003232	PGF_07212308	WD-repeat protein	1506633	1508330	+	Cytoplasmic			bi (<->)	NC_006349	4580	565	fig|243160.12.peg.4580	BMAA1049	toxC	WD-repeat protein	0.998	0.998
NC_006351	6260	406	fig|272560.6.peg.6260	BPSS1912	tnpA	PLF_32008_00000004	PGF_07113884	Mobile element protein	2589898	2591118	-	Cytoplasmic			bi (<->)	NC_006348	1054	406	fig|243160.12.peg.1054	BMA1016		Mobile element protein	0.998	0.998
NC_006351	6454	406	fig|272560.6.peg.6454	BPSS2057		PLF_32008_00000004	PGF_07113884	Mobile element protein	2790628	2791848	-	Cytoplasmic			bi (<->)	NC_006349	5694	406	fig|243160.12.peg.5694	BMAA2072		Mobile element protein	0.998	0.998
NC_006351	5132	410	fig|272560.6.peg.5132	BPSS1005		PLF_32008_00004574	PGF_01078000	Cation/H+ antiporter	1326251	1327483	-	CytoplasmicMembrane			bi (<->)	NC_006349	4761	410	fig|243160.12.peg.4761	BMAA1208		Cation/H+ antiporter	0.998	0.998
NC_006351	6349	456	fig|272560.6.peg.6349	BPSS1976		PLF_32008_00003121	PGF_01070616	putative membrane protein	2671756	2673126	+	CytoplasmicMembrane			bi (<->)	NC_006349	3580	403	fig|243160.12.peg.3580	BMAA0087		putative membrane protein	0.998	0.998
NC_006351	5736	520	fig|272560.6.peg.5736	BPSS1487		PLF_32008_00003989	PGF_00419597	Copper-containing nitrite reductase-like / Cytochrome c	2027135	2028697	+	Periplasmic			bi (<->)	NC_006349	4276	520	fig|243160.12.peg.4276	BMAA0755		Copper-containing nitrite reductase-like / Cytochrome c	0.998	0.998
NC_006350	1256	465	fig|272560.6.peg.1256	BPSL1135		PLF_32008_00003242	PGF_08225224	hypothetical protein	1319300	1320697	+	Unknown			bi (<->)	NC_006348	1936	461	fig|243160.12.peg.1936	BMA1893		hypothetical protein	0.998	0.998
NC_006351	4798	521	fig|272560.6.peg.4798	BPSS0737		PLF_32008_00004788	PGF_00020234	Membrane-fusion protein	991009	992574	-	Unknown			bi (<->)	NC_006349	4953	478	fig|243160.12.peg.4953	BMAA1389		Membrane-fusion protein	0.998	0.998
NC_006350	3670	156	fig|272560.6.peg.3670	BPSL3217	rpsG	PLF_32008_00000832	PGF_00049904	SSU ribosomal protein S7p (S5e)	3812903	3813373	-	Cytoplasmic			bi (<->)	NC_006348	2707	156	fig|243160.12.peg.2707	BMA2636	rpsG	SSU ribosomal protein S7p (S5e)	1	0.994	bi (<->)	LAUA01000004	2720	156	fig|95486.65.peg.2720	WQ49_12385		SSU ribosomal protein S7p (S5e)	0.994	0.994	bi (<->)	NC_010084	373	156	fig|395019.8.peg.373	Bmul_0245		SSU ribosomal protein S7p (S5e)	1	0.994	bi (<->)	CP104982	721	156	fig|652611.54.peg.721
NC_006350	1080	337	fig|272560.6.peg.1080	BPSL0997		PLF_32008_00003828	PGF_00026766	Uncharacterized SAM-dependent O-methyltransferase	1158446	1159459	+	Cytoplasmic			bi (<->)	NC_006348	728	337	fig|243160.12.peg.728	BMA0708		Uncharacterized SAM-dependent O-methyltransferase	0.997	0.997																					uni (->)	CP104982	779	334	fig|652611.54.peg.779
NC_006350	1934	294	fig|272560.6.peg.1934	BPSL1725		PLF_32008_00004306	PGF_00015786	JmjC domain protein	2031680	2032564	-	Cytoplasmic			bi (<->)	NC_006348	1153	294	fig|243160.12.peg.1153	BMA1121		JmjC domain protein	0.997	0.997
NC_006350	2524	344	fig|272560.6.peg.2524	BPSL2224		PLF_32008_00004368	PGF_08225224	hypothetical protein	2668941	2669975	-	Cytoplasmic			bi (<->)	NC_006348	1671	362	fig|243160.12.peg.1671	BMA1630		hypothetical protein	0.997	0.948
NC_006350	2533	612	fig|272560.6.peg.2533	BPSL2232		PLF_32008_00003832	PGF_10503453	Polyketide synthase modules and related proteins	2685503	2687341	-	Cytoplasmic			bi (<->)	NC_006348	1680	612	fig|243160.12.peg.1680	BMA1638		Polyketide synthase modules and related proteins	0.997	0.998
NC_006350	2687	344	fig|272560.6.peg.2687	BPSL2362		PLF_32008_00003257	PGF_00418710	Uncharacterized protease YhbU	2854683	2855717	-	Cytoplasmic			bi (<->)	NC_006348	643	344	fig|243160.12.peg.643	BMA0623		Uncharacterized protease YhbU	0.997	0.997																					bi (<->)	CP104982	1084	331	fig|652611.54.peg.1084
NC_006350	3824	393	fig|272560.6.peg.3824	BPSL3365		PLF_32008_00005128	PGF_01079875	hypothetical protein	3992221	3993402	-	Cytoplasmic			bi (<->)	NC_006348	3066	378	fig|243160.12.peg.3066	BMA2990		hypothetical protein	0.997	0.997
NC_006351	4903	306	fig|272560.6.peg.4903	BPSS0821		PLF_32008_00004462	PGF_08225224	hypothetical protein	1106296	1107216	+	Cytoplasmic			bi (<->)	NC_006349	4198	306	fig|243160.12.peg.4198	BMAA0687		hypothetical protein	0.997	0.997
NC_006351	4937	289	fig|272560.6.peg.4937	BPSS0844		PLF_32008_00003465	PGF_01338048	Hypothetical protein in cluster with At3g50560-like gene family	1131189	1132058	+	Cytoplasmic			bi (<->)	NC_006349	4230	289	fig|243160.12.peg.4230	BMAA0715		Hypothetical protein in cluster with At3g50560-like gene family	0.997	0.997																					bi (<->)	CP104982	3120	281	fig|652611.54.peg.3120
NC_006351	5128	419	fig|272560.6.peg.5128	BPSS1002		PLF_32008_00003422	PGF_01068116	Polyketide biosynthesis 3-hydroxy-3-methylglutaryl-ACP synthase PksG	1322012	1323271	-	Cytoplasmic			bi (<->)	NC_006349	4765	359	fig|243160.12.peg.4765	BMAA1212		Polyketide biosynthesis 3-hydroxy-3-methylglutaryl-ACP synthase PksG	0.997	0.953
NC_006351	5534	329	fig|272560.6.peg.5534	BPSS1321		PLF_32008_00004493	PGF_08225224	hypothetical protein	1808641	1809630	-	Cytoplasmic			bi (<->)	NC_006349	4476	342	fig|243160.12.peg.4476	BMAA0956		hypothetical protein	0.997	0.942
NC_006350	741	288	fig|272560.6.peg.741	BPSL0680		PLF_32008_00004153	PGF_07201805	Permease of the drug/metabolite transporter (DMT) superfamily	774204	775070	-	CytoplasmicMembrane			bi (<->)	NC_006348	231	288	fig|243160.12.peg.231	BMA0232		Permease of the drug/metabolite transporter (DMT) superfamily	0.997	0.997
NC_006350	1802	710	fig|272560.6.peg.1802	BPSL1599		PLF_32008_00003826	PGF_00026077	Nitrous oxide reductase maturation protein NosR	1853587	1855719	-	CytoplasmicMembrane			bi (<->)	NC_006348	1026	710	fig|243160.12.peg.1026	BMA0987		Nitrous oxide reductase maturation protein NosR	0.997	0.999																					bi (<->)	CP104982	1651	715	fig|652611.54.peg.1651
NC_006350	2539	406	fig|272560.6.peg.2539	BPSL2236		PLF_32008_00004564	PGF_03019656	putative membrane protein	2694795	2696015	+	CytoplasmicMembrane			bi (<->)	NC_006348	1686	304	fig|243160.12.peg.1686	BMA1645		putative membrane protein	0.997	0.997
NC_006350	2678	377	fig|272560.6.peg.2678	BPSL2354		PLF_32008_00003867	PGF_08225224	hypothetical protein	2846670	2847803	+	CytoplasmicMembrane			bi (<->)	NC_006348	652	377	fig|243160.12.peg.652			hypothetical protein	0.997	0.997
NC_006350	3049	623	fig|272560.6.peg.3049	BPSL2676	wbiE	PLF_32008_00004694	PGF_00009518	Glycosyl transferase, group 2 family	3201460	3203331	-	CytoplasmicMembrane			bi (<->)	NC_006348	2047	623	fig|243160.12.peg.2047			Glycosyl transferase, group 2 family	0.997	0.998
NC_006351	5886	359	fig|272560.6.peg.5886	BPSS1605		PLF_32008_00004327	PGF_10515270	Two-component system sensor histidine kinase	2181394	2182473	-	CytoplasmicMembrane			bi (<->)	NC_006349	5201	359	fig|243160.12.peg.5201	BMAA1615		Two-component system sensor histidine kinase	0.997	0.997																					uni (->)	CP104982	953	766	fig|652611.54.peg.953
NC_006351	6720	371	fig|272560.6.peg.6720	BPSS2275		PLF_32008_00003935	PGF_00108382	Fatty acid hydroxylase family (carotene hydroxylase/sterol desaturase)	3057306	3058421	-	CytoplasmicMembrane			bi (<->)	NC_006349	5643	367	fig|243160.12.peg.5643	BMAA2018		Fatty acid hydroxylase family (carotene hydroxylase/sterol desaturase)	0.997	0.997																					bi (<->)	CP104982	3095	378	fig|652611.54.peg.3095
NC_006351	5453	629	fig|272560.6.peg.5453	BPSS1260		PLF_32008_00004489	PGF_08225224	hypothetical protein	1708488	1710377	+	Extracellular			bi (<->)	NC_006349	4649	648	fig|243160.12.peg.4649	BMAA1111		hypothetical protein	0.997	0.969
NC_006350	1780	341	fig|272560.6.peg.1780	BPSL1582		PLF_32008_00004182	PGF_08225224	hypothetical protein	1837959	1838984	+	Unknown			bi (<->)	NC_006348	1005	341	fig|243160.12.peg.1005			hypothetical protein	0.997	0.997
NC_006350	1812	352	fig|272560.6.peg.1812	BPSL1608		PLF_32008_00004076	PGF_06690407	FAD:protein FMN transferase (EC 2.7.1.180)	1863332	1864390	+	Unknown			bi (<->)	NC_006348	1036	352	fig|243160.12.peg.1036	BMA0996		FAD:protein FMN transferase (EC 2.7.1.180)	0.997	0.997																					uni (->)	CP104982	2088	342	fig|652611.54.peg.2088
NC_006351	4251	367	fig|272560.6.peg.4251	BPSS0277		PLF_32008_00004651	PGF_00026766	Uncharacterized SAM-dependent O-methyltransferase	369207	370310	-	Unknown			bi (<->)	NC_006349	5062	313	fig|243160.12.peg.5062	BMAA1486		Uncharacterized SAM-dependent O-methyltransferase	0.997	0.997																					uni (->)	CP104982	779	334	fig|652611.54.peg.779
NC_006351	5536	388	fig|272560.6.peg.5536	BPSS1323		PLF_32008_00004408	PGF_08057202	hypothetical protein	1811570	1812736	-	Unknown			bi (<->)	NC_006349	4474	319	fig|243160.12.peg.4474	BMAA0953		hypothetical protein	0.997	0.997
NC_006350	3073	97	fig|272560.6.peg.3073	BPSL2698	groES	PLF_32008_00133240	PGF_09581668	Heat shock protein 10 kDa family chaperone GroES	3225167	3225460	-	Cytoplasmic			bi (<->)	NC_006348	2069	97	fig|243160.12.peg.2069	BMA2002	groES	Heat shock protein 10 kDa family chaperone GroES	1	0.99	bi (<->)	LAUA01000001	358	97	fig|95486.65.peg.358	WQ49_01650		Heat shock protein 10 kDa family chaperone GroES	1	0.99	bi (<->)	NC_010084	2753	97	fig|395019.8.peg.2753	Bmul_2529	groES	Heat shock protein 10 kDa family chaperone GroES	0.99	0.99	bi (<->)	CP104982	4771	97	fig|652611.54.peg.4771
NC_006350	102	87	fig|272560.6.peg.102	BPSL0091		PLF_32008_00000002	PGF_06319202	Insertion element IS407 (Burkholderia multivorans) transposase	103466	103729	-	Cytoplasmic			bi (<->)	NC_006348	2288	87	fig|243160.12.peg.2288	BMA2224		Insertion element IS407 (Burkholderia multivorans) transposase	1	0.989	bi (<->)	LAUA01000003	1886	87	fig|95486.65.peg.1886	WQ49_08585		Insertion element IS407 (Burkholderia multivorans) transposase	0.989	0.989	bi (<->)	NC_010086	5060	87	fig|395019.8.peg.5060	Bmul_4720		Insertion element IS407 (Burkholderia multivorans) transposase	1	0.989	bi (<->)	CP104982	267	87	fig|652611.54.peg.267
NC_006350	1033	87	fig|272560.6.peg.1033	BPSL0950		PLF_32008_00000002	PGF_06319202	Insertion element IS407 (Burkholderia multivorans) transposase	1110368	1110631	+	Cytoplasmic			uni (->)	NC_006348	2288	87	fig|243160.12.peg.2288	BMA2224		Insertion element IS407 (Burkholderia multivorans) transposase	1	0.989	uni (->)	LAUA01000003	1886	87	fig|95486.65.peg.1886	WQ49_08585		Insertion element IS407 (Burkholderia multivorans) transposase	0.989	0.989	uni (->)	NC_010086	5060	87	fig|395019.8.peg.5060	Bmul_4720		Insertion element IS407 (Burkholderia multivorans) transposase	1	0.989	uni (->)	CP104982	267	87	fig|652611.54.peg.267
NC_006350	1640	91	fig|272560.6.peg.1640	BPSL1460	rpsR	PLF_32008_00001136	PGF_00049858	SSU ribosomal protein S18p @ SSU ribosomal protein S18p, zinc-independent	1695456	1695731	+	Cytoplasmic			bi (<->)	NC_006348	1443	91	fig|243160.12.peg.1443	BMA1402	rpsR	SSU ribosomal protein S18p @ SSU ribosomal protein S18p, zinc-independent	1	0.989	bi (<->)	LAUA01000017	6542	91	fig|95486.65.peg.6542	WQ49_30010		SSU ribosomal protein S18p @ SSU ribosomal protein S18p, zinc-independent	0.989	0.989	bi (<->)	NC_010084	1595	91	fig|395019.8.peg.1595	Bmul_1402	rpsR	SSU ribosomal protein S18p @ SSU ribosomal protein S18p, zinc-independent	1	0.989	bi (<->)	CP104982	5471	76	fig|652611.54.peg.5471
NC_006350	1869	87	fig|272560.6.peg.1869	BPSL1658		PLF_32008_00000002	PGF_06319202	Insertion element IS407 (Burkholderia multivorans) transposase	1920400	1920663	-	Cytoplasmic			uni (->)	NC_006348	2288	87	fig|243160.12.peg.2288	BMA2224		Insertion element IS407 (Burkholderia multivorans) transposase	1	0.989	uni (->)	LAUA01000003	1886	87	fig|95486.65.peg.1886	WQ49_08585		Insertion element IS407 (Burkholderia multivorans) transposase	0.989	0.989	uni (->)	NC_010086	5060	87	fig|395019.8.peg.5060	Bmul_4720		Insertion element IS407 (Burkholderia multivorans) transposase	1	0.989	uni (->)	CP104982	267	87	fig|652611.54.peg.267
NC_006350	3565	87	fig|272560.6.peg.3565	BPSL3116		PLF_32008_00000002	PGF_06319202	Insertion element IS407 (Burkholderia multivorans) transposase	3720594	3720857	+	Cytoplasmic			uni (->)	NC_006348	2288	87	fig|243160.12.peg.2288	BMA2224		Insertion element IS407 (Burkholderia multivorans) transposase	1	0.989	uni (->)	LAUA01000003	1886	87	fig|95486.65.peg.1886	WQ49_08585		Insertion element IS407 (Burkholderia multivorans) transposase	0.989	0.989	uni (->)	NC_010086	5060	87	fig|395019.8.peg.5060	Bmul_4720		Insertion element IS407 (Burkholderia multivorans) transposase	1	0.989	uni (->)	CP104982	267	87	fig|652611.54.peg.267
NC_006350	3869	89	fig|272560.6.peg.3869	BPSL3401	atpE	PLF_32008_00000347	PGF_10444145	ATP synthase F0 sector subunit c (EC 3.6.3.14)	4039792	4040061	-	CytoplasmicMembrane			bi (<->)	NC_006348	3021	89	fig|243160.12.peg.3021	BMA2952	atpE-1	ATP synthase F0 sector subunit c (EC 3.6.3.14)	1	0.989	bi (<->)	LAUA01000007	2851	89	fig|95486.65.peg.2851	WQ49_13000		ATP synthase F0 sector subunit c (EC 3.6.3.14)	0.989	0.989	bi (<->)	NC_010084	216	89	fig|395019.8.peg.216	Bmul_0101		ATP synthase F0 sector subunit c (EC 3.6.3.14)	1	0.989	bi (<->)	CP104982	6118	85	fig|652611.54.peg.6118
NC_006350	594	322	fig|272560.6.peg.594	BPSL0530		PLF_32008_00001320	PGF_04645019	HPr kinase/phosphorylase	582675	583643	-	Cytoplasmic			bi (<->)	NC_006348	3188	322	fig|243160.12.peg.3188	BMA3111		HPr kinase/phosphorylase	1	0.997	bi (<->)	LAUA01000017	5536	322	fig|95486.65.peg.5536	WQ49_25215		HPr kinase/phosphorylase	0.994	0.997	bi (<->)	NC_010084	660	322	fig|395019.8.peg.660	Bmul_0521		HPr kinase/phosphorylase	0.994	0.997
NC_006350	2259	225	fig|272560.6.peg.2259	BPSL2005		PLF_32008_00004674	PGF_01078056	hypothetical protein	2389489	2390166	+	Cytoplasmic			bi (<->)	NC_006348	934	225	fig|243160.12.peg.934	BMA0902		hypothetical protein	0.996	0.996
NC_006350	2525	259	fig|272560.6.peg.2525	BPSL2225		PLF_32008_00003974	PGF_08152509	hypothetical protein	2670023	2670802	-	Cytoplasmic			bi (<->)	NC_006348	1672	259	fig|243160.12.peg.1672			hypothetical protein	0.996	0.996
NC_006350	2528	265	fig|272560.6.peg.2528	BPSL2228		PLF_32008_00003911	PGF_00007735	Gll3516 protein	2672623	2673420	-	Cytoplasmic			bi (<->)	NC_006348	1675	265	fig|243160.12.peg.1675	BMA1634		Gll3516 protein	0.996	0.996
NC_006350	2606	493	fig|272560.6.peg.2606	BPSL2296		PLF_32008_00000003	PGF_04444701	Transposase, IS4	2762495	2763976	-	Cytoplasmic			uni (->)	NC_006348	746	515	fig|243160.12.peg.746	BMA0728		Transposase, IS4	0.996	0.955
NC_006351	3935	277	fig|272560.6.peg.3935	BPSS0026		PLF_32008_00004044	PGF_01074587	hypothetical protein	24689	25522	+	Cytoplasmic			bi (<->)	NC_006349	3521	277	fig|243160.12.peg.3521	BMAA0026		hypothetical protein	0.996	0.996
NC_006351	5270	223	fig|272560.6.peg.5270	BPSS1117		PLF_32008_00003854	PGF_00945517	Transcriptional regulator, DeoR family	1498963	1499634	-	Cytoplasmic			bi (<->)	NC_006349	4574	223	fig|243160.12.peg.4574	BMAA1043		Transcriptional regulator, DeoR family	0.996	0.996
NC_006351	5464	295	fig|272560.6.peg.5464	BPSS1270		PLF_32008_00004800	PGF_00196631	hypothetical protein	1734147	1735034	-	Cytoplasmic			bi (<->)	NC_006349	4550	267	fig|243160.12.peg.4550	BMAA1020		hypothetical protein	0.996	0.996
NC_006351	5890	254	fig|272560.6.peg.5890	BPSS1608		PLF_32008_00004558	PGF_01077945	hypothetical protein	2184499	2185263	-	Cytoplasmic			bi (<->)	NC_006349	5206	254	fig|243160.12.peg.5206	BMAA1618		hypothetical protein	0.996	0.996
NC_006351	6766	454	fig|272560.6.peg.6766	BPSS2311		PLF_32008_00002616	PGF_00056948	TldE/PmbA family protein, Beta/Gamma-proteobacterial subgroup	3111756	3113120	-	Cytoplasmic			bi (<->)	NC_006349	5689	454	fig|243160.12.peg.5689	BMAA2065		TldE/PmbA family protein, Beta/Gamma-proteobacterial subgroup	0.996	0.998																					bi (<->)	CP104982	2654	441	fig|652611.54.peg.2654
NC_006350	1065	278	fig|272560.6.peg.1065	BPSL0982		PLF_32008_00004560	PGF_01077967	hypothetical protein	1140236	1141072	-	CytoplasmicMembrane			bi (<->)	NC_006348	713	251	fig|243160.12.peg.713			hypothetical protein	0.996	0.996
NC_006350	1156	523	fig|272560.6.peg.1156	BPSL1065		PLF_32008_00004563	PGF_01077994	putative membrane protein	1230018	1231589	-	CytoplasmicMembrane			bi (<->)	NC_006348	2270	523	fig|243160.12.peg.2270	BMA2204		putative membrane protein	0.996	0.998
NC_006350	1807	278	fig|272560.6.peg.1807	BPSL1604		PLF_32008_00004092	PGF_00026086	Nitrous oxide reductase maturation transmembrane protein NosY	1857508	1858344	-	CytoplasmicMembrane			bi (<->)	NC_006348	1031	278	fig|243160.12.peg.1031	BMA0992		Nitrous oxide reductase maturation transmembrane protein NosY	0.996	0.996																					bi (<->)	CP104982	1647	275	fig|652611.54.peg.1647
NC_006351	3919	225	fig|272560.6.peg.3919	BPSS0013		PLF_32008_00004127	PGF_01256876	Integral membrane protein	12536	13213	+	CytoplasmicMembrane			bi (<->)	NC_006349	3505	225	fig|243160.12.peg.3505	BMAA0013		Integral membrane protein	0.996	0.996																					uni (->)	CP104982	3886	157	fig|652611.54.peg.3886
NC_006351	5781	261	fig|272560.6.peg.5781	BPSS1525	bopE	PLF_32008_00003909	PGF_00006670	G-nucleotide exchange factor SopE	2078020	2078805	+	Extracellular			bi (<->)	NC_006349	5099	261	fig|243160.12.peg.5099	BMAA1523	bopE	G-nucleotide exchange factor SopE	0.996	0.996
NC_006350	1969	521	fig|272560.6.peg.1969	BPSL1754		PLF_32008_00003568	PGF_00801325	UPF0748 protein YngK	2066847	2068412	+	Periplasmic			bi (<->)	NC_006348	1189	554	fig|243160.12.peg.1189	BMA1156		UPF0748 protein YngK	0.996	0.939
NC_006351	4148	837	fig|272560.6.peg.4148	BPSS0200		PLF_32008_00004654	PGF_00030211	Penicillin acylase (EC 3.5.1.11)	266228	268741	+	Periplasmic			bi (<->)	NC_006349	5489	837	fig|243160.12.peg.5489	BMAA1877		Penicillin acylase (EC 3.5.1.11)	0.996	0.999																					bi (<->)	CP104982	3334	809	fig|652611.54.peg.3334
NC_006350	312	273	fig|272560.6.peg.312	BPSL0290		PLF_32008_00003084	PGF_00319443	hypothetical protein	302370	303191	-	Unknown			bi (<->)	NC_006348	3432	273	fig|243160.12.peg.3432			hypothetical protein	0.996	0.996
NC_006350	333	224	fig|272560.6.peg.333	BPSL0303		PLF_32008_00002646	PGF_01416568	LemA family protein	321837	322511	+	Unknown			bi (<->)	NC_006348	3456	224	fig|243160.12.peg.3456	BMA3370		LemA family protein	0.996	0.996																					bi (<->)	CP104982	576	202	fig|652611.54.peg.576
NC_006350	2175	85	fig|272560.6.peg.2175	BPSL1930		PLF_32008_00001161	PGF_01050376	hypothetical protein	2298377	2298634	+	Unknown			bi (<->)	NC_006348	1108	85	fig|243160.12.peg.1108			hypothetical protein	1	0.988	bi (<->)	LAUA01000017	7030	85	fig|95486.65.peg.7030	WQ49_32295		hypothetical protein	0.988	0.988	bi (<->)	NC_010084	1981	85	fig|395019.8.peg.1981	Bmul_1767		hypothetical protein	1	0.988
NC_006350	2340	474	fig|272560.6.peg.2340	BPSL2070		PLF_32008_00005588	PGF_08225224	hypothetical protein	2476552	2477976	-	Unknown			bi (<->)	NC_006348	859	474	fig|243160.12.peg.859			hypothetical protein	0.996	0.998
NC_006350	3498	277	fig|272560.6.peg.3498	BPSL3064		PLF_32008_00004602	PGF_10534392	Transcriptional regulator, AraC family	3654417	3655250	+	Unknown			bi (<->)	NC_006349	4028	277	fig|243160.12.peg.4028	BMAA0516		Transcriptional regulator, AraC family	0.996	0.996
NC_006350	3784	245	fig|272560.6.peg.3784	BPSL3330		PLF_32008_00005083	PGF_12856141	hypothetical protein	3949407	3950144	-	Unknown			bi (<->)	NC_006348	2954	284	fig|243160.12.peg.2954	BMA2884		hypothetical protein	0.996	0.859
NC_006351	5107	270	fig|272560.6.peg.5107	BPSS0986		PLF_32008_00004566	PGF_12826685	hypothetical protein	1304319	1305131	+	Unknown			bi (<->)	NC_006349	4788	249	fig|243160.12.peg.4788	BMAA1235		hypothetical protein	0.996	0.996
NC_006351	6306	282	fig|272560.6.peg.6306	BPSS1945	atpG	PLF_32008_00004222	PGF_00053401	Sodium-transporting ATPase subunit G	2632318	2633166	-	Unknown			bi (<->)	NC_006349	3625	282	fig|243160.12.peg.3625	BMAA0131		Sodium-transporting ATPase subunit G	0.996	0.996
NC_006350	1679	420	fig|272560.6.peg.1679	BPSL1495	rho	PLF_32008_00000576	PGF_00057483	Transcription termination factor Rho	1733194	1734456	-	Cytoplasmic			bi (<->)	NC_006348	1403	420	fig|243160.12.peg.1403	BMA1365	rho	Transcription termination factor Rho	0.998	0.998	bi (<->)	LAUA01000017	6585	420	fig|95486.65.peg.6585	WQ49_30220	rho	Transcription termination factor Rho	0.995	0.998	bi (<->)	NC_010084	1641	420	fig|395019.8.peg.1641	Bmul_1444	rho	Transcription termination factor Rho	0.993	0.998	bi (<->)	CP104982	5787	419	fig|652611.54.peg.5787
NC_006351	6072	70	fig|272560.6.peg.6072	BPSS1758	rpsU	PLF_32008_00000312	PGF_04034430	SSU ribosomal protein S21p	2411951	2412163	-	Cytoplasmic			bi (<->)	NC_006349	3831	70	fig|243160.12.peg.3831	BMAA0336	rpsU	SSU ribosomal protein S21p	1	0.986	bi (<->)	LAUA01000016	3727	70	fig|95486.65.peg.3727	WQ49_16925		SSU ribosomal protein S21p	0.986	0.986	bi (<->)	NC_010086	5133	70	fig|395019.8.peg.5133	Bmul_4816	rpsU	SSU ribosomal protein S21p	1	0.986	bi (<->)	CP104982	621	71	fig|652611.54.peg.621
NC_006350	3050	574	fig|272560.6.peg.3050	BPSL2677	wbiD	PLF_32008_00004721	PGF_06387022	putative O-antigen methyl transferase	3203353	3205077	-	Cytoplasmic	Y		bi (<->)	NC_006348	2048	574	fig|243160.12.peg.2048	BMA1981		putative O-antigen methyl transferase	0.995	0.998
NC_006350	1116	406	fig|272560.6.peg.1116	BPSL1028	tnpA	PLF_32008_00000004	PGF_07113884	Mobile element protein	1197036	1198256	-	Cytoplasmic			uni (->)	NC_006349	5694	406	fig|243160.12.peg.5694	BMAA2072		Mobile element protein	0.995	0.998
NC_006350	2177	406	fig|272560.6.peg.2177	BPSL1932	tnpA	PLF_32008_00000004	PGF_07113884	Mobile element protein	2299152	2300372	+	Cytoplasmic			uni (->)	NC_006349	5694	406	fig|243160.12.peg.5694	BMAA2072		Mobile element protein	0.995	0.998
NC_006350	2516	399	fig|272560.6.peg.2516	BPSL2216		PLF_32008_00003250	PGF_00016263	L-threonine kinase in B12 biosynthesis (EC 2.7.1.177)	2660474	2661673	-	Cytoplasmic			bi (<->)	NC_006348	1663	399	fig|243160.12.peg.1663	BMA1622		L-threonine kinase in B12 biosynthesis (EC 2.7.1.177)	0.995	0.997
NC_006350	2697	484	fig|272560.6.peg.2697	BPSL2369		PLF_32008_00003588	PGF_00015514	Iron-sulfur cluster assembly protein SufB	2864978	2866432	+	Cytoplasmic			bi (<->)	NC_006348	633	397	fig|243160.12.peg.633			Iron-sulfur cluster assembly protein SufB	0.995	0.965
NC_006350	2838	406	fig|272560.6.peg.2838	BPSL2488	tnpA	PLF_32008_00000004	PGF_07113884	Mobile element protein	3001719	3002939	-	Cytoplasmic			uni (->)	NC_006349	5694	406	fig|243160.12.peg.5694	BMAA2072		Mobile element protein	0.995	0.998
NC_006350	3198	416	fig|272560.6.peg.3198	BPSL2802	wcbF	PLF_32008_00005641	PGF_00168330	hypothetical protein	3349358	3350608	-	Cytoplasmic			bi (<->)	NC_006348	2368	459	fig|243160.12.peg.2368			hypothetical protein	0.995	0.904
NC_006350	3213	406	fig|272560.6.peg.3213	BPSL2817	tnpA	PLF_32008_00000004	PGF_07113884	Mobile element protein	3368578	3369798	-	Cytoplasmic			uni (->)	NC_006349	5694	406	fig|243160.12.peg.5694	BMAA2072		Mobile element protein	0.995	0.998
NC_006350	3261	184	fig|272560.6.peg.3261	BPSL2860	phnN	PLF_32008_00002595	PGF_02604083	Ribose 1,5-bisphosphate phosphokinase PhnN (EC 2.7.4.23)	3421316	3421870	+	Cytoplasmic			bi (<->)	NC_006348	2472	184	fig|243160.12.peg.2472	BMA2397	phnN	Ribose 1,5-bisphosphate phosphokinase PhnN (EC 2.7.4.23)	0.995	0.995																					bi (<->)	CP104982	1669	185	fig|652611.54.peg.1669
NC_006351	4826	410	fig|272560.6.peg.4826	BPSS0760		PLF_32008_00004227	PGF_00060105	Transcriptional regulator	1020817	1022049	+	Cytoplasmic			bi (<->)	NC_006349	4108	410	fig|243160.12.peg.4108	BMAA0602		Transcriptional regulator	0.995	0.998																					bi (<->)	CP104982	3308	515	fig|652611.54.peg.3308
NC_006351	4888	244	fig|272560.6.peg.4888	BPSS0811		PLF_32008_00004051	PGF_01074615	hypothetical protein	1086233	1086967	-	Cytoplasmic			bi (<->)	NC_006349	4177	202	fig|243160.12.peg.4177	BMAA0672		hypothetical protein	0.995	0.995																					bi (<->)	CP104982	3333	207	fig|652611.54.peg.3333
NC_006351	5137	552	fig|272560.6.peg.5137	BPSS1010		PLF_32008_00004542	PGF_00010922	Halogenase PrnC	1379414	1381072	+	Cytoplasmic			bi (<->)	NC_006349	4744	552	fig|243160.12.peg.4744	BMAA1201	prnC	Halogenase PrnC	0.995	0.998
NC_006351	5733	405	fig|272560.6.peg.5733	BPSS1484		PLF_32008_00003848	PGF_00058386	Transcriptional regulator	2024180	2025397	+	Cytoplasmic			bi (<->)	NC_006349	4279	405	fig|243160.12.peg.4279	BMAA0758		Transcriptional regulator	0.995	0.998
NC_006351	5760	256	fig|272560.6.peg.5760	BPSS1506		PLF_32008_00004177	PGF_08225224	hypothetical protein	2056608	2057378	+	Cytoplasmic			bi (<->)	NC_006349	4251	212	fig|243160.12.peg.4251	BMAA0735		hypothetical protein	0.995	0.995
NC_006351	5805	428	fig|272560.6.peg.5805	BPSS1547		PLF_32008_00003735	PGF_00063585	Type III secretion protein EprH	2101717	2103003	+	Cytoplasmic			bi (<->)	NC_006349	5123	389	fig|243160.12.peg.5123	BMAA1547	bsaM	Type III secretion protein EprH	0.995	0.997
NC_006351	5934	392	fig|272560.6.peg.5934	BPSS1647		PLF_32008_00003895	PGF_00411854	Blr0328 protein	2263768	2264946	-	Cytoplasmic			bi (<->)	NC_006349	5250	376	fig|243160.12.peg.5250	BMAA1661		Blr0328 protein	0.995	0.997																					bi (<->)	CP104982	3247	387	fig|652611.54.peg.3247
NC_006350	1821	444	fig|272560.6.peg.1821	BPSL1616		PLF_32008_00004320	PGF_00758217	Sodium/hydrogen exchanger	1872876	1874210	-	CytoplasmicMembrane			bi (<->)	NC_006348	1044	459	fig|243160.12.peg.1044	BMA1004		Sodium/hydrogen exchanger	0.995	0.965																					uni (->)	CP104982	6088	585	fig|652611.54.peg.6088
NC_006350	2679	407	fig|272560.6.peg.2679	BPSL2355		PLF_32008_00003691	PGF_02963785	NnrS protein involved in response to NO	2847949	2849172	+	CytoplasmicMembrane			bi (<->)	NC_006348	651	407	fig|243160.12.peg.651	BMA0630		NnrS protein involved in response to NO	0.995	0.998																					uni (->)	CP104982	2465	397	fig|652611.54.peg.2465
NC_006350	2696	398	fig|272560.6.peg.2696	BPSL2368		PLF_32008_00002895	PGF_02963785	NnrS protein involved in response to NO	2863293	2864489	+	CytoplasmicMembrane			bi (<->)	NC_006348	634	380	fig|243160.12.peg.634	BMA0614		NnrS protein involved in response to NO	0.995	0.997																					bi (<->)	CP104982	2465	397	fig|652611.54.peg.2465
NC_006350	2290	186	fig|272560.6.peg.2290	BPSL2030		PLF_32008_00003480	PGF_00052139	Sigma-fimbriae uncharacterized paralogous subunit	2425438	2425998	-	Extracellular			bi (<->)	NC_006348	902	186	fig|243160.12.peg.902			Sigma-fimbriae uncharacterized paralogous subunit	0.995	0.995																					uni (->)	CP104982	5167	182	fig|652611.54.peg.5167
NC_006350	3800	214	fig|272560.6.peg.3800	BPSL3340		PLF_32008_00003789	PGF_09760073	Chitin binding protein	3962264	3962908	-	Extracellular			bi (<->)	NC_006348	2969	185	fig|243160.12.peg.2969	BMA2896		Chitin binding protein	0.995	0.995																					uni (->)	CP104982	4452	389	fig|652611.54.peg.4452
NC_006351	4123	825	fig|272560.6.peg.4123	BPSS0182		PLF_32008_00004267	PGF_10538468	Pentapeptide repeat family protein	243886	246363	+	Extracellular			bi (<->)	NC_006349	5513	825	fig|243160.12.peg.5513	BMAA1900		Pentapeptide repeat family protein	0.995	0.999
NC_006350	313	187	fig|272560.6.peg.313	BPSL0291		PLF_32008_00003120	PGF_00409629	putative membrane protein	303251	303814	-	Unknown			bi (<->)	NC_006348	3433	187	fig|243160.12.peg.3433	BMA3347		putative membrane protein	0.995	0.995
NC_006350	745	435	fig|272560.6.peg.745	BPSL0684		PLF_32008_00004381	PGF_07844318	3-phosphoshikimate 1-carboxyvinyltransferase (EC 2.5.1.19)	779381	780688	-	Unknown			bi (<->)	NC_006348	235	435	fig|243160.12.peg.235			3-phosphoshikimate 1-carboxyvinyltransferase (EC 2.5.1.19)	0.995	0.998
NC_006350	1537	189	fig|272560.6.peg.1537	BPSL1370		PLF_32008_00003636	PGF_08225224	hypothetical protein	1601130	1601699	+	Unknown			bi (<->)	NC_006348	815	189	fig|243160.12.peg.815	BMA0791		hypothetical protein	0.995	0.995
NC_006350	2699	411	fig|272560.6.peg.2699	BPSL2371		PLF_32008_00003812	PGF_00015517	Iron-sulfur cluster assembly protein SufD	2867237	2868472	+	Unknown			bi (<->)	NC_006348	631	411	fig|243160.12.peg.631	BMA0611		Iron-sulfur cluster assembly protein SufD	0.995	0.998
NC_006350	2926	67	fig|272560.6.peg.2926	BPSL2562	rpoZ	PLF_32008_00000752	PGF_05906360	DNA-directed RNA polymerase omega subunit (EC 2.7.7.6)	3092509	3092712	-	Unknown			bi (<->)	NC_006348	2163	67	fig|243160.12.peg.2163	BMA2095	rpoZ	DNA-directed RNA polymerase omega subunit (EC 2.7.7.6)	1	0.985	bi (<->)	LAUA01000001	505	67	fig|95486.65.peg.505	WQ49_02355		DNA-directed RNA polymerase omega subunit (EC 2.7.7.6)	1	0.97	bi (<->)	NC_010084	2618	67	fig|395019.8.peg.2618	Bmul_2400		DNA-directed RNA polymerase omega subunit (EC 2.7.7.6)	0.985	0.97	bi (<->)	CP104982	5889	88	fig|652611.54.peg.5889
NC_006351	4503	207	fig|272560.6.peg.4503	BPSS0495		PLF_32008_00002822	PGF_05803436	Nitroreductase family protein	672507	673130	-	Unknown			bi (<->)	NC_006349	5382	207	fig|243160.12.peg.5382	BMAA1783		Nitroreductase family protein	0.995	0.995																					bi (<->)	CP104982	1875	186	fig|652611.54.peg.1875
NC_006351	5078	221	fig|272560.6.peg.5078	BPSS0963		PLF_32008_00003885	PGF_01074311	hypothetical protein	1273561	1274226	+	Unknown			bi (<->)	NC_006349	4816	221	fig|243160.12.peg.4816	BMAA1262		hypothetical protein	0.995	0.995
NC_006351	5399	657	fig|272560.6.peg.5399	BPSS1224		PLF_32008_00004656	PGF_00041418	Putative hydrolase	1655766	1657739	+	Unknown			bi (<->)	NC_006349	4595	657	fig|243160.12.peg.4595	BMAA1063		Putative hydrolase	0.995	0.998
NC_006351	5809	200	fig|272560.6.peg.5809	BPSS1551		PLF_32008_00004699	PGF_03298478	Oxygen-regulated invasion protein OrgA	2104565	2105167	+	Unknown			bi (<->)	NC_006349	5127	200	fig|243160.12.peg.5127	BMAA1551	orgA	Oxygen-regulated invasion protein OrgA	0.995	0.995
NC_006351	5874	560	fig|272560.6.peg.5874	BPSS1593	pilV	PLF_32008_00003625	PGF_01072635	alternative bacteriophage tail fiber C-terminus	2167547	2169229	-	Unknown			bi (<->)	NC_006349	5189	575	fig|243160.12.peg.5189	BMAA1603		alternative bacteriophage tail fiber C-terminus	0.995	0.965																					bi (<->)	CP104982	4973	442	fig|652611.54.peg.4973
NC_006351	5876	196	fig|272560.6.peg.5876	BPSS1595	pilS	PLF_32008_00003717	PGF_01073263	Putative type IV pilin protein	2169748	2170338	-	Unknown			bi (<->)	NC_006349	5191	196	fig|243160.12.peg.5191	BMAA1605		Putative type IV pilin protein	0.995	0.995																					bi (<->)	CP104982	4971	176	fig|652611.54.peg.4971
NC_006351	6030	327	fig|272560.6.peg.6030	BPSS1722	mdh	PLF_32008_00000159	PGF_00018956	Malate dehydrogenase (EC 1.1.1.37)	2360644	2361627	+	Unknown			bi (<->)	NC_006349	5349	272	fig|243160.12.peg.5349	BMAA1751	mdh	Malate dehydrogenase (EC 1.1.1.37)	1	0.996	bi (<->)	LAUA01000016	3670	328	fig|95486.65.peg.3670	WQ49_16670		Malate dehydrogenase (EC 1.1.1.37)	0.997	0.994	bi (<->)	NC_010086	4998	328	fig|395019.8.peg.4998	Bmul_4651		Malate dehydrogenase (EC 1.1.1.37)	0.988	0.994
NC_006351	6193	395	fig|272560.6.peg.6193	BPSS1860		PLF_32008_00005682	PGF_00390681	hypothetical protein	2524957	2526144	-	Unknown			bi (<->)	NC_006349	3743	400	fig|243160.12.peg.3743	BMAA0239		hypothetical protein	0.995	0.985
NC_006351	6723	632	fig|272560.6.peg.6723	BPSS2278		PLF_32008_00003660	PGF_00417721	Cholesterol oxidase (EC 1.1.3.6) @ Steroid Delta(5)->Delta(4)-isomerase (EC 5.3.3.1)	3060320	3062218	+	Unknown			bi (<->)	NC_006349	5646	632	fig|243160.12.peg.5646	BMAA2022		Cholesterol oxidase (EC 1.1.3.6) @ Steroid Delta(5)->Delta(4)-isomerase (EC 5.3.3.1)	0.995	0.998
NC_006350	2374	182	fig|272560.6.peg.2374	BPSL2096		PLF_32008_00001477	PGF_00041794	Alkyl hydroperoxide reductase protein C (EC 1.11.1.15)	2516543	2517091	+	Cytoplasmic	Y		bi (<->)	NC_006348	1529	182	fig|243160.12.peg.1529	BMA1487		Alkyl hydroperoxide reductase protein C (EC 1.11.1.15)	1	0.995	bi (<->)	LAUA01000017	6468	182	fig|95486.65.peg.6468	WQ49_29645		Alkyl hydroperoxide reductase protein C (EC 1.11.1.15)	0.984	0.995	bi (<->)	NC_010084	1518	182	fig|395019.8.peg.1518	Bmul_1331		Alkyl hydroperoxide reductase protein C (EC 1.11.1.15)	1	0.995	uni (->)	CP104982	4456	199	fig|652611.54.peg.4456
NC_006350	685	166	fig|272560.6.peg.685	BPSL0631		PLF_32008_00002179	PGF_02690675	RidA/YER057c/UK114 superfamily protein	714463	714963	+	Cytoplasmic			bi (<->)	NC_006348	176	128	fig|243160.12.peg.176	BMA0179		RidA/YER057c/UK114 superfamily protein	1	0.992	bi (<->)	LAUA01000017	5597	128	fig|95486.65.peg.5597	WQ49_25500		RidA/YER057c/UK114 superfamily protein	0.992	0.992	bi (<->)	NC_010084	701	128	fig|395019.8.peg.701	Bmul_0560		RidA/YER057c/UK114 superfamily protein	0.992	0.992	bi (<->)	CP104982	1956	125	fig|652611.54.peg.1956
NC_006350	1638	124	fig|272560.6.peg.1638	BPSL1458	rpsF	PLF_32008_00000985	PGF_00049901	SSU ribosomal protein S6p	1694743	1695117	+	Cytoplasmic			bi (<->)	NC_006348	1445	124	fig|243160.12.peg.1445	BMA1404	rpsF	SSU ribosomal protein S6p	1	0.992	bi (<->)	LAUA01000017	6540	124	fig|95486.65.peg.6540	WQ49_30000		SSU ribosomal protein S6p	0.992	0.992	bi (<->)	NC_010084	1593	124	fig|395019.8.peg.1593	Bmul_1400	rpsF	SSU ribosomal protein S6p	0.992	0.992	bi (<->)	CP104982	5472	139	fig|652611.54.peg.5472
NC_006350	3645	72	fig|272560.6.peg.3645	BPSL3192	infA	PLF_32008_00001266	PGF_00060431	Translation initiation factor 1	3798026	3798244	-	Cytoplasmic			bi (<->)	NC_006348	2682	64	fig|243160.12.peg.2682	BMA2611	infA	Translation initiation factor 1	0.984	0.984	bi (<->)	LAUA01000004	2695	72	fig|95486.65.peg.2695	WQ49_12260	infA	Translation initiation factor 1	1	0.986	bi (<->)	NC_010084	398	64	fig|395019.8.peg.398	Bmul_0270	infA	Translation initiation factor 1	1	0.984	bi (<->)	CP104982	2510	72	fig|652611.54.peg.2510
NC_006350	3656	122	fig|272560.6.peg.3656	BPSL3203	rplN	PLF_32008_00000540	PGF_00016340	LSU ribosomal protein L14p (L23e)	3803365	3803733	-	Cytoplasmic			bi (<->)	NC_006348	2693	122	fig|243160.12.peg.2693	BMA2622	rplN	LSU ribosomal protein L14p (L23e)	1	0.992	bi (<->)	LAUA01000004	2706	122	fig|95486.65.peg.2706	WQ49_12315		LSU ribosomal protein L14p (L23e)	0.984	0.992	bi (<->)	NC_010084	387	122	fig|395019.8.peg.387	Bmul_0259		LSU ribosomal protein L14p (L23e)	1	0.992	bi (<->)	CP104982	735	122	fig|652611.54.peg.735
NC_006350	3649	172	fig|272560.6.peg.3649	BPSL3196	rpsE	PLF_32008_00000570	PGF_00049896	SSU ribosomal protein S5p (S2e)	3800306	3800824	-	Cytoplasmic			bi (<->)	NC_006348	2686	172	fig|243160.12.peg.2686	BMA2615	rpsE	SSU ribosomal protein S5p (S2e)	1	0.994	bi (<->)	LAUA01000004	2699	172	fig|95486.65.peg.2699	WQ49_12280		SSU ribosomal protein S5p (S2e)	0.983	0.994	bi (<->)	NC_010084	394	172	fig|395019.8.peg.394	Bmul_0266	rpsE	SSU ribosomal protein S5p (S2e)	1	0.994	bi (<->)	CP104982	742	166	fig|652611.54.peg.742
NC_006350	1959	313	fig|272560.6.peg.1959	BPSL1745	arcC	PLF_32008_00002660	PGF_02806641	Carbamate kinase (EC 2.7.2.2)	2057744	2058685	+	Cytoplasmic			bi (<->)	NC_006348	1179	313	fig|243160.12.peg.1179	BMA1147	arcC	Carbamate kinase (EC 2.7.2.2)	0.994	0.997																					bi (<->)	CP104982	5719	310	fig|652611.54.peg.5719
NC_006350	3069	91	fig|272560.6.peg.3069	BPSL2695	rubA	PLF_32008_00014947	PGF_00929131	Rubredoxin	3221882	3222157	-	Cytoplasmic			bi (<->)	NC_006348	2066	50	fig|243160.12.peg.2066	BMA1999	rubA-1	Rubredoxin	1	0.98	bi (<->)	LAUA01000001	361	56	fig|95486.65.peg.361	WQ49_01665		Rubredoxin	1	0.982	bi (<->)	NC_010084	2750	56	fig|395019.8.peg.2750	Bmul_2526		Rubredoxin	0.982	0.982	bi (<->)	CP104982	5903	55	fig|652611.54.peg.5903
NC_006350	3896	230	fig|272560.6.peg.3896	BPSL3426		PLF_32008_00008596	PGF_07420062	Two-component transcriptional response regulator, OmpR family	4067752	4068444	+	Cytoplasmic			bi (<->)	NC_006348	2994	230	fig|243160.12.peg.2994	BMA2924		Two-component transcriptional response regulator, OmpR family	1	0.996	bi (<->)	LAUA01000007	2824	230	fig|95486.65.peg.2824	WQ49_12880		Two-component transcriptional response regulator, OmpR family	0.991	0.996	bi (<->)	NC_010084	189	230	fig|395019.8.peg.189	Bmul_0075		Two-component transcriptional response regulator, OmpR family	0.991	0.996	uni (->)	CP104982	5303	221	fig|652611.54.peg.5303
NC_006351	4098	352	fig|272560.6.peg.4098	BPSS0160		PLF_32008_00004102	PGF_00045750	PvcA protein, related to known isonitrile synthases	211595	212653	+	Cytoplasmic			bi (<->)	NC_006349	5539	352	fig|243160.12.peg.5539	BMAA1924	pvcA	PvcA protein, related to known isonitrile synthases	0.994	0.997																					bi (<->)	CP104982	2947	328	fig|652611.54.peg.2947
NC_006351	5076	159	fig|272560.6.peg.5076	BPSS0961		PLF_32008_00004064	PGF_01074660	hypothetical protein	1268583	1269062	+	Cytoplasmic			bi (<->)	NC_006349	4819	159	fig|243160.12.peg.4819	BMAA1265		hypothetical protein	0.994	0.994
NC_006351	5797	154	fig|272560.6.peg.5797	BPSS1540	bsaT	PLF_32008_00004999	PGF_00186170	Surface presentation of antigens protein	2093294	2093758	-	Cytoplasmic			bi (<->)	NC_006349	5115	154	fig|243160.12.peg.5115	BMAA1539	bsaT	Surface presentation of antigens protein	0.994	0.994
NC_006351	6014	315	fig|272560.6.peg.6014	BPSS1709		PLF_32008_00004555	PGF_03918665	hypothetical protein	2345455	2346402	-	Cytoplasmic			bi (<->)	NC_006349	5330	315	fig|243160.12.peg.5330	BMAA1732		hypothetical protein	0.994	0.997
NC_006351	6293	321	fig|272560.6.peg.6293	BPSS1935		PLF_32008_00003727	PGF_10336906	Transcriptional regulator, AcrR family	2617380	2618345	-	Cytoplasmic			bi (<->)	NC_006349	3639	321	fig|243160.12.peg.3639	BMAA0142		Transcriptional regulator, AcrR family	0.994	0.997
NC_006351	6303	171	fig|272560.6.peg.6303	BPSS1943		PLF_32008_00004798	PGF_01078230	hypothetical protein	2630498	2631013	-	Cytoplasmic			bi (<->)	NC_006349	3628	171	fig|243160.12.peg.3628	BMAA0133		hypothetical protein	0.994	0.994
NC_006350	488	112	fig|272560.6.peg.488	BPSL0434	glnB1	PLF_32008_00007929	PGF_01681855	Nitrogen regulatory protein P-II, GlnK	473463	473801	+	CytoplasmicMembrane			bi (<->)	NC_006348	3296	112	fig|243160.12.peg.3296	BMA3218		Nitrogen regulatory protein P-II, GlnK	1	0.991	bi (<->)	LAUA01000017	5452	112	fig|95486.65.peg.5452	WQ49_24820		Nitrogen regulatory protein P-II, GlnK	0.991	0.991	bi (<->)	NC_010084	576	112	fig|395019.8.peg.576	Bmul_0437		Nitrogen regulatory protein P-II, GlnK	0.991	0.991	bi (<->)	CP104982	5840	112	fig|652611.54.peg.5840
NC_006351	6258	350	fig|272560.6.peg.6258	BPSS1910		PLF_32008_00004046	PGF_01078623	hypothetical protein	2586540	2587592	+	CytoplasmicMembrane			bi (<->)	NC_006349	3679	350	fig|243160.12.peg.3679	BMAA0179		hypothetical protein	0.994	0.997
NC_006351	5752	169	fig|272560.6.peg.5752	BPSS1498		PLF_32008_00069012	PGF_04613386	T6SS component Hcp	2043052	2043561	+	Extracellular			bi (<->)	NC_006349	4259	169	fig|243160.12.peg.4259	BMAA0742		T6SS component Hcp	0.994	0.994																					bi (<->)	CP104982	272	172	fig|652611.54.peg.272
NC_006351	5758	880	fig|272560.6.peg.5758	BPSS1504		PLF_32008_00285981	PGF_08260346	hypothetical protein	2052905	2055547	+	Extracellular			bi (<->)	NC_006349	4253	880	fig|243160.12.peg.4253			hypothetical protein	0.994	0.999
NC_006350	1803	164	fig|272560.6.peg.1803	BPSL1600		PLF_32008_00004425	PGF_00420311	Cytochrome c family protein	1855778	1856272	-	Unknown			bi (<->)	NC_006348	1027	164	fig|243160.12.peg.1027	BMA0988		Cytochrome c family protein	0.994	0.994																					bi (<->)	CP104982	5880	129	fig|652611.54.peg.5880
NC_006350	1918	790	fig|272560.6.peg.1918	BPSL1710		PLF_32008_00000103	PGF_07704136	Family S45 unassigned peptidase (EC 3.5.1.11)	1994317	1996689	-	Unknown			bi (<->)	NC_006348	1074	790	fig|243160.12.peg.1074	BMA1038		Family S45 unassigned peptidase (EC 3.5.1.11)	0.994	0.999																					uni (->)	CP104982	4260	847	fig|652611.54.peg.4260
NC_006350	2208	357	fig|272560.6.peg.2208	BPSL1958		PLF_32008_00130765	PGF_08225224	hypothetical protein	2331168	2332241	+	Unknown			bi (<->)	NC_006348	1144	357	fig|243160.12.peg.1144			hypothetical protein	0.994	0.997
NC_006350	2291	181	fig|272560.6.peg.2291	BPSL2031		PLF_32008_00004816	PGF_00138374	hypothetical protein	2426051	2426596	-	Unknown			bi (<->)	NC_006348	901	181	fig|243160.12.peg.901	BMA0872		hypothetical protein	0.994	0.994																					uni (->)	CP104982	5167	182	fig|652611.54.peg.5167
NC_006350	2908	158	fig|272560.6.peg.2908	BPSL2548		PLF_32008_00006148	PGF_02979573	hypothetical protein	3076607	3077083	+	Unknown			bi (<->)	NC_006348	483	158	fig|243160.12.peg.483			hypothetical protein	0.994	0.994
NC_006351	4287	493	fig|272560.6.peg.4287	BPSS0304		PLF_32008_00004366	PGF_00397694	hypothetical protein	408326	409807	-	Unknown			bi (<->)	NC_006349	5024	493	fig|243160.12.peg.5024	BMAA1454		hypothetical protein	0.994	0.998
NC_006351	4836	326	fig|272560.6.peg.4836	BPSS0769		PLF_32008_00004114	PGF_12732886	Xylanase	1030401	1031381	-	Unknown			bi (<->)	NC_006349	4119	326	fig|243160.12.peg.4119	BMAA0612		Xylanase	0.994	0.997
NC_006351	4874	154	fig|272560.6.peg.4874	BPSS0798		PLF_32008_00004618	PGF_01078025	hypothetical protein	1070554	1071018	-	Unknown			bi (<->)	NC_006349	4163	154	fig|243160.12.peg.4163	BMAA0653		hypothetical protein	0.994	0.994
NC_006351	5120	499	fig|272560.6.peg.5120	BPSS0994		PLF_32008_00004491	PGF_08225224	hypothetical protein	1312677	1314176	-	Unknown			bi (<->)	NC_006349	4775	499	fig|243160.12.peg.4775	BMAA1222		hypothetical protein	0.994	0.998
NC_006351	5180	162	fig|272560.6.peg.5180	BPSS1045		PLF_32008_00002566	PGF_02227611	Uncharacterized protein AF2422 with adenosine kinase domain	1424960	1425448	-	Unknown			bi (<->)	NC_006349	4563	162	fig|243160.12.peg.4563	BMAA1036		Uncharacterized protein AF2422 with adenosine kinase domain	0.994	0.994
NC_006351	5888	162	fig|272560.6.peg.5888	BPSS1607		PLF_32008_00004328	PGF_01076017	Type III secretion protein, HrpB1	2183466	2183954	+	Unknown			bi (<->)	NC_006349	5204	162	fig|243160.12.peg.5204	BMAA1617		Type III secretion protein, HrpB1	0.994	0.994
NC_006351	5937	163	fig|272560.6.peg.5937	BPSS1650		PLF_32008_00004562	PGF_08225224	hypothetical protein	2269250	2269741	+	Unknown			bi (<->)	NC_006349	5254	163	fig|243160.12.peg.5254	BMAA1664.1		hypothetical protein	0.994	0.994
NC_006351	6492	318	fig|272560.6.peg.6492	BPSS2103		PLF_32008_00002933	PGF_07284942	T6SS associated component TagF (ImpM)	2846642	2847598	-	Unknown			bi (<->)	NC_006349	3898	179	fig|243160.12.peg.3898	BMAA0400		T6SS associated component TagF (ImpM)	0.994	0.939																					bi (<->)	CP104982	82	226	fig|652611.54.peg.82
NC_006350	837	309	fig|272560.6.peg.837	BPSL0780	sucD	PLF_32008_00000839	PGF_00853393	Succinyl-CoA ligase [ADP-forming] alpha chain (EC 6.2.1.5)	907637	908566	+	Cytoplasmic			bi (<->)	NC_006348	270	309	fig|243160.12.peg.270	BMA0276	sucD	Succinyl-CoA ligase [ADP-forming] alpha chain (EC 6.2.1.5)	0.994	0.997	bi (<->)	LAUA01000017	5694	293	fig|95486.65.peg.5694	WQ49_25950		Succinyl-CoA ligase [ADP-forming] alpha chain (EC 6.2.1.5)	0.993	0.997	bi (<->)	NC_010084	800	293	fig|395019.8.peg.800	Bmul_0654		Succinyl-CoA ligase [ADP-forming] alpha chain (EC 6.2.1.5)	0.993	0.997	bi (<->)	CP104982	3661	295	fig|652611.54.peg.3661
NC_006350	3433	103	fig|272560.6.peg.3433	BPSL3005	rplU	PLF_32008_00000463	PGF_04978890	LSU ribosomal protein L21p	3581781	3582092	-	Cytoplasmic			bi (<->)	NC_006348	2603	103	fig|243160.12.peg.2603	BMA2523	rplU	LSU ribosomal protein L21p	1	0.99	bi (<->)	LAUA01000001	36	103	fig|95486.65.peg.36	WQ49_00200		LSU ribosomal protein L21p	0.99	0.99	bi (<->)	NC_010084	3041	103	fig|395019.8.peg.3041	Bmul_2802	rplU	LSU ribosomal protein L21p	0.99	0.99	bi (<->)	CP104982	5079	103	fig|652611.54.peg.5079
NC_006350	1342	153	fig|272560.6.peg.1342	BPSL1212	nuoB	PLF_32008_00284610	PGF_04380075	NADH-ubiquinone oxidoreductase chain B (EC 1.6.5.3)	1397231	1397692	+	CytoplasmicMembrane			bi (<->)	NC_006348	1866	153	fig|243160.12.peg.1866	BMA1828	nuoB-1	NADH-ubiquinone oxidoreductase chain B (EC 1.6.5.3)	1	0.993	bi (<->)	LAUA01000017	6107	159	fig|95486.65.peg.6107	WQ49_27905		NADH-ubiquinone oxidoreductase chain B (EC 1.6.5.3)	0.987	0.956	bi (<->)	NC_010084	1199	153	fig|395019.8.peg.1199	Bmul_1029		NADH-ubiquinone oxidoreductase chain B (EC 1.6.5.3)	0.993	0.993	bi (<->)	CP104982	2491	225	fig|652611.54.peg.2491
NC_006350	1351	101	fig|272560.6.peg.1351	BPSL1221	nuoK	PLF_32008_00000948	PGF_08749001	NADH-ubiquinone oxidoreductase chain K (EC 1.6.5.3)	1406307	1406612	+	CytoplasmicMembrane			bi (<->)	NC_006348	1857	101	fig|243160.12.peg.1857	BMA1819	nuoK	NADH-ubiquinone oxidoreductase chain K (EC 1.6.5.3)	1	0.99	bi (<->)	LAUA01000017	6116	101	fig|95486.65.peg.6116	WQ49_27950		NADH-ubiquinone oxidoreductase chain K (EC 1.6.5.3)	0.98	0.99	bi (<->)	NC_010084	1208	101	fig|395019.8.peg.1208	Bmul_1038		NADH-ubiquinone oxidoreductase chain K (EC 1.6.5.3)	1	0.99	bi (<->)	CP104982	2482	102	fig|652611.54.peg.2482
NC_006350	2020	533	fig|272560.6.peg.2020	BPSL1796		PLF_32008_00003984	PGF_01074403	Asparagine synthase	2135807	2137408	+	Cytoplasmic			bi (<->)	NC_006348	1238	422	fig|243160.12.peg.1238	BMA1202		Asparagine synthase	0.993	0.998
NC_006350	2275	286	fig|272560.6.peg.2275	BPSL2016		PLF_32008_00004447	PGF_08225224	hypothetical protein	2406273	2407133	+	Cytoplasmic			bi (<->)	NC_006348	918	286	fig|243160.12.peg.918	BMA0888		hypothetical protein	0.993	0.997
NC_006350	2684	148	fig|272560.6.peg.2684	BPSL2359		PLF_32008_00003447	PGF_08225224	hypothetical protein	2852734	2853180	-	Cytoplasmic			bi (<->)	NC_006348	646	148	fig|243160.12.peg.646			hypothetical protein	0.993	0.993																					bi (<->)	CP104982	1119	131	fig|652611.54.peg.1119
NC_006351	5644	302	fig|272560.6.peg.5644	BPSS1411		PLF_32008_00004713	PGF_03059395	hypothetical protein	1923714	1924622	+	Cytoplasmic			bi (<->)	NC_006349	4089	302	fig|243160.12.peg.4089	BMAA0582		hypothetical protein	0.993	0.997
NC_006351	5753	153	fig|272560.6.peg.5753	BPSS1499		PLF_32008_00004113	PGF_01074816	T6SS lysozyme-like component TssE	2043554	2044015	+	Cytoplasmic			bi (<->)	NC_006349	4258	153	fig|243160.12.peg.4258	BMAA0741		T6SS lysozyme-like component TssE	0.993	0.993																					bi (<->)	CP104982	3585	135	fig|652611.54.peg.3585
NC_006351	5895	151	fig|272560.6.peg.5895	BPSS1611		PLF_32008_00003364	PGF_00063474	Type III secretion HpaB protein	2188230	2188685	-	Cytoplasmic			bi (<->)	NC_006349	5211	151	fig|243160.12.peg.5211	BMAA1622		Type III secretion HpaB protein	0.993	0.993
NC_006350	2320	855	fig|272560.6.peg.2320	BPSL2056		PLF_32008_00004889	PGF_00007111	Galactose oxidase-related protein	2460880	2463447	+	CytoplasmicMembrane			bi (<->)	NC_006348	876	858	fig|243160.12.peg.876	BMA0847		Galactose oxidase-related protein	0.993	0.993
NC_006351	4280	337	fig|272560.6.peg.4280	BPSS0298		PLF_32008_00004101	PGF_01074767	Putative permease	400571	401584	-	CytoplasmicMembrane			bi (<->)	NC_006349	5031	296	fig|243160.12.peg.5031	BMAA1460		Putative permease	0.993	0.997
NC_006351	4825	409	fig|272560.6.peg.4825	BPSS0759	codB	PLF_32008_00003668	PGF_00420694	Cytosine permease	1019583	1020812	+	CytoplasmicMembrane			bi (<->)	NC_006349	4107	409	fig|243160.12.peg.4107	BMAA0601	codB	Cytosine permease	0.993	0.998																					bi (<->)	CP104982	475	416	fig|652611.54.peg.475
NC_006350	1150	145	fig|272560.6.peg.1150	BPSL1057		PLF_32008_00004438	PGF_01076857	Putative exported protein precursor	1224827	1225264	+	Periplasmic			bi (<->)	NC_006348	3100	158	fig|243160.12.peg.3100	BMA3024		Putative exported protein precursor	0.993	0.905																					bi (<->)	CP104982	1095	153	fig|652611.54.peg.1095
NC_006350	1809	416	fig|272560.6.peg.1809	BPSL1606		PLF_32008_00004014	PGF_00644209	Nitrous oxide reductase maturation protein NosD	1859252	1860502	-	Periplasmic			bi (<->)	NC_006348	1033	416	fig|243160.12.peg.1033	BMA0994		Nitrous oxide reductase maturation protein NosD	0.993	0.998																					bi (<->)	CP104982	1649	421	fig|652611.54.peg.1649
NC_006351	4797	441	fig|272560.6.peg.4797	BPSS0736		PLF_32008_00004410	PGF_08225224	hypothetical protein	989669	990994	-	Periplasmic			bi (<->)	NC_006349	4954	441	fig|243160.12.peg.4954	BMAA1390		hypothetical protein	0.993	0.998
NC_006350	1436	274	fig|272560.6.peg.1436	BPSL1292		PLF_32008_00002937	PGF_08225224	hypothetical protein	1505095	1505919	+	Unknown			bi (<->)	NC_006348	3165	274	fig|243160.12.peg.3165	BMA3087		hypothetical protein	0.993	0.996
NC_006351	4691	154	fig|272560.6.peg.4691	BPSS0649		PLF_32008_00004814	PGF_02222672	hypothetical protein	881655	882119	+	Unknown			bi (<->)	NC_006349	4369	144	fig|243160.12.peg.4369			hypothetical protein	0.993	0.993
NC_006351	4899	176	fig|272560.6.peg.4899	BPSS0818		PLF_32008_00003868	PGF_08225224	hypothetical protein	1102032	1102562	+	Unknown			bi (<->)	NC_006349	4187	215	fig|243160.12.peg.4187	BMAA0683		hypothetical protein	0.993	0.67
NC_006351	5694	454	fig|272560.6.peg.5694	BPSS1454		PLF_32008_00004556	PGF_08225224	hypothetical protein	1984227	1985591	+	Unknown			bi (<->)	NC_006349	4317	454	fig|243160.12.peg.4317	BMAA0794		hypothetical protein	0.993	0.998
NC_006351	5766	335	fig|272560.6.peg.5766	BPSS1512		PLF_32008_00003951	PGF_02929555	hypothetical protein	2065602	2066609	+	Unknown			bi (<->)	NC_006349	4244	284	fig|243160.12.peg.4244	BMAA0729		hypothetical protein	0.993	0.996
NC_006351	5814	323	fig|272560.6.peg.5814	BPSS1553		PLF_32008_00004018	PGF_01074495	Possible transmembrane regulator	2106912	2107883	+	Unknown			bi (<->)	NC_006349	5132	304	fig|243160.12.peg.5132	BMAA1556		Possible transmembrane regulator	0.993	0.997
NC_006351	5815	161	fig|272560.6.peg.5815	BPSS1554		PLF_32008_00004054	PGF_01074627	hypothetical protein	2107850	2108335	+	Unknown			bi (<->)	NC_006349	5133	145	fig|243160.12.peg.5133	BMAA1557		hypothetical protein	0.993	0.993
NC_006351	5915	588	fig|272560.6.peg.5915	BPSS1630		PLF_32008_00003742	PGF_08225224	hypothetical protein	2204186	2205952	+	Unknown			bi (<->)	NC_006349	5231	588	fig|243160.12.peg.5231	BMAA1641		hypothetical protein	0.993	0.998
NC_006350	4	92	fig|272560.6.peg.4	BPSL0004	hupA	PLF_32008_00128315	PGF_10519443	DNA-binding protein HU	5488	5766	+	Cytoplasmic			bi (<->)	NC_006348	2984	92	fig|243160.12.peg.2984	BMA2913	hupB	DNA-binding protein HU	1	0.989	bi (<->)	LAUA01000007	2813	92	fig|95486.65.peg.2813	WQ49_12835		DNA-binding protein HU	0.989	0.989	bi (<->)	NC_010084	179	92	fig|395019.8.peg.179	Bmul_0066		DNA-binding protein HU	0.989	0.989	bi (<->)	CP104982	3430	90	fig|652611.54.peg.3430
NC_006350	1087	189	fig|272560.6.peg.1087	BPSL1002	dcd	PLF_32008_00000753	PGF_00422918	Deoxycytidine triphosphate deaminase (EC 3.5.4.13)	1165366	1165935	+	Cytoplasmic			bi (<->)	NC_006348	733	189	fig|243160.12.peg.733	BMA0714	dcd	Deoxycytidine triphosphate deaminase (EC 3.5.4.13)	1	0.995	bi (<->)	LAUA01000017	5922	189	fig|95486.65.peg.5922	WQ49_27020	dcd	Deoxycytidine triphosphate deaminase (EC 3.5.4.13)	0.989	0.995	bi (<->)	NC_010084	1018	189	fig|395019.8.peg.1018	Bmul_0861	dcd	Deoxycytidine triphosphate deaminase (EC 3.5.4.13)	0.989	0.995	bi (<->)	CP104982	1559	188	fig|652611.54.peg.1559
NC_006350	2865	570	fig|272560.6.peg.2865	BPSL2515	rpsA	PLF_32008_00000829	PGF_09939762	SSU ribosomal protein S1p	3028413	3030125	-	Cytoplasmic			bi (<->)	NC_006348	435	544	fig|243160.12.peg.435	BMA0428	rpsA	SSU ribosomal protein S1p	1	0.998	bi (<->)	LAUA01000017	7629	576	fig|95486.65.peg.7629	WQ49_35070	rpsA	SSU ribosomal protein S1p	0.988	0.988	bi (<->)	NC_010084	2484	570	fig|395019.8.peg.2484	Bmul_2257	rpsA	SSU ribosomal protein S1p	0.989	0.998	bi (<->)	CP104982	1924	559	fig|652611.54.peg.1924
NC_006350	3654	179	fig|272560.6.peg.3654	BPSL3201	rplE	PLF_32008_00000544	PGF_00016443	LSU ribosomal protein L5p (L11e)	3802490	3803029	-	Cytoplasmic			bi (<->)	NC_006348	2691	179	fig|243160.12.peg.2691	BMA2620	rplE	LSU ribosomal protein L5p (L11e)	0.994	0.994	bi (<->)	LAUA01000004	2704	179	fig|95486.65.peg.2704	WQ49_12305		LSU ribosomal protein L5p (L11e)	0.994	0.994	bi (<->)	NC_010084	389	179	fig|395019.8.peg.389	Bmul_0261	rplE	LSU ribosomal protein L5p (L11e)	0.989	0.994	bi (<->)	CP104982	737	179	fig|652611.54.peg.737
NC_006350	3660	266	fig|272560.6.peg.3660	BPSL3207	rpsC	PLF_32008_00000831	PGF_00049889	SSU ribosomal protein S3p (S3e)	3804935	3805735	-	Cytoplasmic			bi (<->)	NC_006348	2697	266	fig|243160.12.peg.2697	BMA2626	rpsC	SSU ribosomal protein S3p (S3e)	1	0.996	bi (<->)	LAUA01000004	2710	266	fig|95486.65.peg.2710	WQ49_12335		SSU ribosomal protein S3p (S3e)	0.985	0.996	bi (<->)	NC_010084	383	266	fig|395019.8.peg.383	Bmul_0255	rpsC	SSU ribosomal protein S3p (S3e)	0.992	0.996	bi (<->)	CP104982	731	228	fig|652611.54.peg.731
NC_006350	3460	389	fig|272560.6.peg.3460	BPSL3028	mraY	PLF_32008_00000473	PGF_00033359	Phospho-N-acetylmuramoyl-pentapeptide-transferase (EC 2.7.8.13)	3608887	3610056	-	CytoplasmicMembrane			bi (<->)	NC_006348	2631	389	fig|243160.12.peg.2631	BMA2554	mraY	Phospho-N-acetylmuramoyl-pentapeptide-transferase (EC 2.7.8.13)	1	0.997	bi (<->)	LAUA01000001	12	389	fig|95486.65.peg.12	WQ49_00070		Phospho-N-acetylmuramoyl-pentapeptide-transferase (EC 2.7.8.13)	0.982	0.997	bi (<->)	NC_010084	3070	389	fig|395019.8.peg.3070	Bmul_2839	mraY	Phospho-N-acetylmuramoyl-pentapeptide-transferase (EC 2.7.8.13)	0.995	0.997	bi (<->)	CP104982	4800	360	fig|652611.54.peg.4800
NC_006350	2019	236	fig|272560.6.peg.2019	BPSL1795		PLF_32008_00003790	PGF_08225224	hypothetical protein	2135020	2135730	+	Cytoplasmic			bi (<->)	NC_006348	1237	236	fig|243160.12.peg.1237	BMA1201		hypothetical protein	0.992	0.996
NC_006351	4540	238	fig|272560.6.peg.4540	BPSS0527		PLF_32008_00003635	PGF_08225224	hypothetical protein	720090	720806	+	Cytoplasmic			bi (<->)	NC_006349	3949	236	fig|243160.12.peg.3949	BMAA0449		hypothetical protein	0.992	0.996
NC_006351	5992	126	fig|272560.6.peg.5992	BPSS1690		PLF_32008_00004787	PGF_01539496	Mannose-6-phosphate isomerase	2324021	2324401	-	Cytoplasmic			bi (<->)	NC_006349	5309	126	fig|243160.12.peg.5309	BMAA1711		Mannose-6-phosphate isomerase	0.992	0.992																					bi (<->)	CP104982	2695	124	fig|652611.54.peg.2695
NC_006350	2713	366	fig|272560.6.peg.2713	BPSL2382		PLF_32008_00003218	PGF_01071268	Fatty acid desaturase	2877150	2878250	+	CytoplasmicMembrane			bi (<->)	NC_006348	617	366	fig|243160.12.peg.617	BMA0599		Fatty acid desaturase	0.992	0.997
NC_006350	3836	392	fig|272560.6.peg.3836	BPSL3374		PLF_32008_00003890	PGF_00034519	Acyltransferase family protein	4004245	4005423	+	CytoplasmicMembrane			bi (<->)	NC_006348	3054	392	fig|243160.12.peg.3054	BMA2979		Acyltransferase family protein	0.992	0.997
NC_006351	4911	647	fig|272560.6.peg.4911	BPSS0827		PLF_32008_00000108	PGF_00021430	Microbial collagenase, secreted (EC 3.4.24.3)	1113432	1115375	+	Extracellular			bi (<->)	NC_006349	4205	647	fig|243160.12.peg.4205	BMAA0694		Microbial collagenase, secreted (EC 3.4.24.3)	0.992	0.998
NC_006350	342	121	fig|272560.6.peg.342	BPSL0311		PLF_32008_00005771	PGF_00389445	hypothetical protein	331174	331539	+	Unknown			bi (<->)	NC_006348	3465	127	fig|243160.12.peg.3465	BMA3378		hypothetical protein	0.992	0.945
NC_006350	1255	238	fig|272560.6.peg.1255	BPSL1134		PLF_32008_00035331	PGF_08225224	hypothetical protein	1318522	1319238	+	Unknown			bi (<->)	NC_006348	1937	238	fig|243160.12.peg.1937	BMA1894		hypothetical protein	0.992	0.996
NC_006350	2116	528	fig|272560.6.peg.2116	BPSL1877		PLF_32008_00003745	PGF_08225224	hypothetical protein	2234575	2236161	+	Unknown			bi (<->)	NC_006348	1300	528	fig|243160.12.peg.1300	BMA1269		hypothetical protein	0.992	0.998
NC_006350	2358	125	fig|272560.6.peg.2358	BPSL2082		PLF_32008_00004613	PGF_00348417	hypothetical protein	2501376	2501753	-	Unknown			bi (<->)	NC_006348	840	125	fig|243160.12.peg.840	BMA0813		hypothetical protein	0.992	0.984
NC_006351	4134	130	fig|272560.6.peg.4134	BPSS0191		PLF_32008_00003925	PGF_01074336	Putative dioxygenase	256006	256398	-	Unknown			bi (<->)	NC_006349	5502	130	fig|243160.12.peg.5502	BMAA1889		Putative dioxygenase	0.992	0.992
NC_006351	5893	481	fig|272560.6.peg.5893	BPSS1610		PLF_32008_00003718	PGF_00047302	Regulatory protein HrpB	2186573	2188018	-	Unknown			bi (<->)	NC_006349	5209	477	fig|243160.12.peg.5209	BMAA1621		Regulatory protein HrpB	0.992	0.998
NC_006350	3072	546	fig|272560.6.peg.3072	BPSL2697	groEL	PLF_32008_00000011	PGF_01212739	Heat shock protein 60 kDa family chaperone GroEL	3223479	3225119	-	Cytoplasmic			bi (<->)	NC_006348	2068	550	fig|243160.12.peg.2068	BMA2001	groEL	Heat shock protein 60 kDa family chaperone GroEL	0.996	0.991	bi (<->)	LAUA01000001	359	546	fig|95486.65.peg.359	WQ49_01655	groEL	Heat shock protein 60 kDa family chaperone GroEL	0.984	0.998	bi (<->)	NC_010084	2752	546	fig|395019.8.peg.2752	Bmul_2528	groEL	Heat shock protein 60 kDa family chaperone GroEL	0.995	0.998	bi (<->)	CP104982	4770	547	fig|652611.54.peg.4770
NC_006350	3650	121	fig|272560.6.peg.3650	BPSL3197	rplR	PLF_32008_00000646	PGF_00016353	LSU ribosomal protein L18p (L5e)	3800838	3801203	-	Cytoplasmic			bi (<->)	NC_006348	2687	121	fig|243160.12.peg.2687	BMA2616	rplR	LSU ribosomal protein L18p (L5e)	1	0.992	bi (<->)	LAUA01000004	2700	121	fig|95486.65.peg.2700	WQ49_12285		LSU ribosomal protein L18p (L5e)	0.983	0.992	bi (<->)	NC_010084	393	121	fig|395019.8.peg.393	Bmul_0265	rplR	LSU ribosomal protein L18p (L5e)	0.992	0.992	bi (<->)	CP104982	741	116	fig|652611.54.peg.741
NC_006350	3324	142	fig|272560.6.peg.3324	BPSL2911	rplM	PLF_32008_00000782	PGF_06180597	LSU ribosomal protein L13p (L13Ae)	3479748	3480176	-	Cytoplasmic			bi (<->)	NC_006348	2411	111	fig|243160.12.peg.2411	BMA2341	rplM	LSU ribosomal protein L13p (L13Ae)	0.982	0.991	bi (<->)	LAUA01000001	139	176	fig|95486.65.peg.139	WQ49_00670		LSU ribosomal protein L13p (L13Ae)	0.993	0.801	bi (<->)	NC_010084	2938	176	fig|395019.8.peg.2938	Bmul_2704	rplM	LSU ribosomal protein L13p (L13Ae)	1	0.801	bi (<->)	CP104982	4818	142	fig|652611.54.peg.4818
NC_006350	1706	79	fig|272560.6.peg.1706	BPSL1518	hfq	PLF_32008_00000685	PGF_00046622	RNA-binding protein Hfq	1757798	1758037	+	Cytoplasmic	Y		bi (<->)	NC_006348	1378	79	fig|243160.12.peg.1378	BMA1340	hfq	RNA-binding protein Hfq	1	0.987	bi (<->)	LAUA01000017	6608	79	fig|95486.65.peg.6608	WQ49_30330		RNA-binding protein Hfq	0.987	0.987	bi (<->)	NC_010084	1666	79	fig|395019.8.peg.1666	Bmul_1468	hfq	RNA-binding protein Hfq	0.987	0.987	bi (<->)	CP104982	5481	82	fig|652611.54.peg.5481
NC_006350	101	277	fig|272560.6.peg.101	BPSL0090		PLF_32008_00000001	PGF_09978608	Transposase	102609	103442	-	Cytoplasmic			bi (<->)	NC_006348	983	277	fig|243160.12.peg.983	BMA0948		Transposase	1	0.996	uni (->)	LAUA01000003	1808	286	fig|95486.65.peg.1808	WQ49_08230		Transposase	0.985	0.958	bi (<->)	NC_010086	5059	277	fig|395019.8.peg.5059	Bmul_4719		Transposase	0.989	0.996	uni (->)	CP104982	4610	280	fig|652611.54.peg.4610
NC_006350	2578	427	fig|272560.6.peg.2578	BPSL2270	eno	PLF_32008_00000258	PGF_02516909	Enolase (EC 4.2.1.11)	2733734	2735017	-	Cytoplasmic			bi (<->)	NC_006348	1727	427	fig|243160.12.peg.1727	BMA1689	eno	Enolase (EC 4.2.1.11)	1	0.998	bi (<->)	LAUA01000017	6288	427	fig|95486.65.peg.6288	WQ49_28765	eno	Enolase (EC 4.2.1.11)	0.988	0.998	bi (<->)	NC_010084	1341	427	fig|395019.8.peg.1341	Bmul_1163	eno	Enolase (EC 4.2.1.11)	0.986	0.998	bi (<->)	CP104982	1415	429	fig|652611.54.peg.1415
NC_006350	3566	276	fig|272560.6.peg.3566	BPSL3117		PLF_32008_00000001	PGF_09978608	Transposase	3720884	3721714	+	Cytoplasmic			uni (->)	NC_006348	983	277	fig|243160.12.peg.983	BMA0948		Transposase	0.996	0.993	bi (<->)	LAUA01000003	1808	286	fig|95486.65.peg.1808	WQ49_08230		Transposase	0.985	0.958	uni (->)	NC_010086	5059	277	fig|395019.8.peg.5059	Bmul_4719		Transposase	0.993	0.989	bi (<->)	CP104982	4610	280	fig|652611.54.peg.4610
NC_006351	5277	236	fig|272560.6.peg.5277	BPSS1123		PLF_32008_00003870	PGF_12862918	hypothetical protein	1508327	1509037	+	Cytoplasmic			bi (<->)	NC_006349	4581	226	fig|243160.12.peg.4581	BMAA1050		hypothetical protein	0.991	0.969
NC_006350	2690	466	fig|272560.6.peg.2690	BPSL2364		PLF_32008_00004022	PGF_01929858	Putative transmembrane protein	2857159	2858559	+	CytoplasmicMembrane			bi (<->)	NC_006348	640	448	fig|243160.12.peg.640	BMA0620		Putative transmembrane protein	0.991	0.998
NC_006351	5492	231	fig|272560.6.peg.5492	BPSS1290		PLF_32008_00004241	PGF_00408557	putative membrane protein	1763423	1764118	+	CytoplasmicMembrane			bi (<->)	NC_006349	4523	231	fig|243160.12.peg.4523	BMAA0994		putative membrane protein	0.991	0.996
NC_006351	5706	779	fig|272560.6.peg.5706	BPSS1464		PLF_32008_00003008	PGF_05244201	Uncharacterized FAD-binding oxidoreductase Reut_B5165	1995853	1998192	+	CytoplasmicMembrane			bi (<->)	NC_006349	4303	653	fig|243160.12.peg.4303			Uncharacterized FAD-binding oxidoreductase Reut_B5165	0.991	0.998																					uni (->)	CP104982	4902	850	fig|652611.54.peg.4902
NC_006350	59	113	fig|272560.6.peg.59	BPSL0056		PLF_32008_00003075	PGF_01662006	Transcriptional regulator, PadR family	61697	62038	+	Unknown			bi (<->)	NC_006348	2727	113	fig|243160.12.peg.2727	BMA2658		Transcriptional regulator, PadR family	0.991	0.991
NC_006351	3937	329	fig|272560.6.peg.3937	BPSS0028		PLF_32008_00004049	PGF_01074610	hypothetical protein	27476	28465	+	Unknown			bi (<->)	NC_006349	3523	329	fig|243160.12.peg.3523	BMAA0028		hypothetical protein	0.991	0.997
NC_006351	4117	321	fig|272560.6.peg.4117	BPSS0176		PLF_32008_00004791	PGF_00038194	T6SS associated component TagJ (ImpE)	235775	236740	+	Unknown			bi (<->)	NC_006349	5519	321	fig|243160.12.peg.5519	BMAA1906		T6SS associated component TagJ (ImpE)	0.991	0.997																					uni (->)	CP104982	93	281	fig|652611.54.peg.93
NC_006351	5762	265	fig|272560.6.peg.5762	BPSS1508		PLF_32008_00003869	PGF_01074301	T6SS secretion lipoprotein TssJ (VasD)	2057809	2058606	+	Unknown			bi (<->)	NC_006349	4249	225	fig|243160.12.peg.4249	BMAA0733		T6SS secretion lipoprotein TssJ (VasD)	0.991	0.996
NC_006351	5909	225	fig|272560.6.peg.5909	BPSS1625		PLF_32008_00004840	PGF_01078368	HrpB4 protein	2199563	2200240	+	Unknown			bi (<->)	NC_006349	5225	225	fig|243160.12.peg.5225	BMAA1635		HrpB4 protein	0.991	0.996
NC_006350	3639	108	fig|272560.6.peg.3639	BPSL3186	rplQ	PLF_32008_00000541	PGF_00016346	LSU ribosomal protein L17p	3794645	3794971	-	Cytoplasmic			bi (<->)	NC_006348	2676	108	fig|243160.12.peg.2676	BMA2604	rplQ	LSU ribosomal protein L17p	1	0.991	bi (<->)	LAUA01000004	2689	131	fig|95486.65.peg.2689	WQ49_12230		LSU ribosomal protein L17p	0.981	0.817	bi (<->)	NC_010084	404	131	fig|395019.8.peg.404	Bmul_0276	rplQ	LSU ribosomal protein L17p	0.991	0.817	bi (<->)	CP104982	751	129	fig|652611.54.peg.751
NC_006350	3679	143	fig|272560.6.peg.3679	BPSL3225	rplK	PLF_32008_00000261	PGF_07695531	LSU ribosomal protein L11p (L12e)	3826850	3827281	-	Cytoplasmic			bi (<->)	NC_006348	2718	143	fig|243160.12.peg.2718	BMA2645	rplK	LSU ribosomal protein L11p (L12e)	1	0.993	bi (<->)	LAUA01000004	2729	143	fig|95486.65.peg.2729	WQ49_12425		LSU ribosomal protein L11p (L12e)	0.979	0.993	bi (<->)	NC_010084	365	143	fig|395019.8.peg.365	Bmul_0237	rplK	LSU ribosomal protein L11p (L12e)	0.993	0.993	bi (<->)	CP104982	714	143	fig|652611.54.peg.714
NC_006350	3772	70	fig|272560.6.peg.3772	BPSL3318	rpsU	PLF_32008_00001568	PGF_04034430	SSU ribosomal protein S21p	3936905	3937117	-	Cytoplasmic			bi (<->)	NC_006348	2942	87	fig|243160.12.peg.2942	BMA2872	rpsU-1	SSU ribosomal protein S21p	1	0.793	bi (<->)	LAUA01000007	2942	70	fig|95486.65.peg.2942	WQ49_13425		SSU ribosomal protein S21p	0.986	0.986	bi (<->)	NC_010084	273	70	fig|395019.8.peg.273	Bmul_0152		SSU ribosomal protein S21p	0.986	0.986	uni (->)	CP104982	621	71	fig|652611.54.peg.621
NC_006350	235	70	fig|272560.6.peg.235	BPSL0219		PLF_32008_00021068	PGF_00404863	protein export membrane protein, SecD/SecF family, putative	228394	228606	+	Unknown			bi (<->)	NC_006348	3353	70	fig|243160.12.peg.3353			protein export membrane protein, SecD/SecF family, putative	1	0.986	bi (<->)	LAUA01000017	5217	70	fig|95486.65.peg.5217	WQ49_23765		protein export membrane protein, SecD/SecF family, putative	0.986	0.986	bi (<->)	NC_010084	3312	70	fig|395019.8.peg.3312	Bmul_3070		protein export membrane protein, SecD/SecF family, putative	0.986	0.986
NC_006350	2686	291	fig|272560.6.peg.2686	BPSL2361		PLF_32008_00003531	PGF_03870438	Uncharacterized peptidase U32 family member YhbV	2853755	2854630	-	Cytoplasmic			bi (<->)	NC_006348	644	291	fig|243160.12.peg.644	BMA0624		Uncharacterized peptidase U32 family member YhbV	0.99	0.997																					bi (<->)	CP104982	1085	296	fig|652611.54.peg.1085
NC_006351	5872	294	fig|272560.6.peg.5872	BPSS1591		PLF_32008_00004118	PGF_08225224	hypothetical protein	2164673	2165557	+	CytoplasmicMembrane			bi (<->)	NC_006349	5187	294	fig|243160.12.peg.5187			hypothetical protein	0.99	0.997
NC_006351	5779	512	fig|272560.6.peg.5779	BPSS1524	bopA	PLF_32008_00003952	PGF_00233253	hypothetical protein	2075849	2077387	-	Extracellular			bi (<->)	NC_006349	5097	563	fig|243160.12.peg.5097	BMAA1521	bopA	hypothetical protein	0.99	0.908
NC_006350	645	117	fig|272560.6.peg.645	BPSL0595		PLF_32008_00003556	PGF_00317017	hypothetical protein	666528	666881	-	Unknown			bi (<->)	NC_006348	16	101	fig|243160.12.peg.16			hypothetical protein	0.99	0.99
NC_006351	4542	197	fig|272560.6.peg.4542	BPSS0529		PLF_32008_00003561	PGF_08258142	T6SS secretion lipoprotein TssJ (VasD)	721244	721837	+	Unknown			bi (<->)	NC_006349	3951	197	fig|243160.12.peg.3951	BMAA0451		T6SS secretion lipoprotein TssJ (VasD)	0.99	0.995
NC_006351	5807	100	fig|272560.6.peg.5807	BPSS1549		PLF_32008_00004377	PGF_01076386	Type III secretion system protein	2103329	2103631	+	Unknown			bi (<->)	NC_006349	5125	100	fig|243160.12.peg.5125	BMAA1549	bsaK	Type III secretion system protein	0.99	0.99
NC_006351	5906	193	fig|272560.6.peg.5906	BPSS1622		PLF_32008_00004552	PGF_01077883	Type III secretion protein, HrpB1	2197704	2198285	+	Unknown			bi (<->)	NC_006349	5222	191	fig|243160.12.peg.5222	BMAA1632		Type III secretion protein, HrpB1	0.99	0.995
NC_006351	5917	6094	fig|272560.6.peg.5917	BPSS1632		PLF_32008_00128893	PGF_06261705	Siderophore biosynthesis non-ribosomal peptide synthetase modules	2207213	2225497	-	Unknown			bi (<->)	NC_006349	5233	3334	fig|243160.12.peg.5233	BMAA1643		Siderophore biosynthesis non-ribosomal peptide synthetase modules	0.99	0.999																					bi (<->)	CP104982	2803	2448	fig|652611.54.peg.2803
NC_006350	3569	203	fig|272560.6.peg.3569	BPSL3120		PLF_32008_00000838	PGF_00054301	Stringent starvation protein A	3725547	3726158	-	Cytoplasmic			bi (<->)	NC_006348	2764	203	fig|243160.12.peg.2764	BMA2695	sspA	Stringent starvation protein A	1	0.995	bi (<->)	LAUA01000004	2616	203	fig|95486.65.peg.2616	WQ49_11885		Stringent starvation protein A	0.985	0.995	bi (<->)	NC_010084	480	203	fig|395019.8.peg.480	Bmul_0347		Stringent starvation protein A	0.985	0.995	bi (<->)	CP104982	4813	205	fig|652611.54.peg.4813
NC_006350	3640	325	fig|272560.6.peg.3640	BPSL3187	rpoA	PLF_32008_00000522	PGF_00422271	DNA-directed RNA polymerase alpha subunit (EC 2.7.7.6)	3795181	3796158	-	Cytoplasmic			bi (<->)	NC_006348	2677	325	fig|243160.12.peg.2677	BMA2606	rpoA	DNA-directed RNA polymerase alpha subunit (EC 2.7.7.6)	1	0.997	bi (<->)	LAUA01000004	2690	325	fig|95486.65.peg.2690	WQ49_12235		DNA-directed RNA polymerase alpha subunit (EC 2.7.7.6)	0.985	0.997	bi (<->)	NC_010084	403	325	fig|395019.8.peg.403	Bmul_0275		DNA-directed RNA polymerase alpha subunit (EC 2.7.7.6)	0.985	0.997	bi (<->)	CP104982	750	333	fig|652611.54.peg.750
NC_006350	2590	248	fig|272560.6.peg.2590	BPSL2280	prfB	PLF_32008_00001496	PGF_00696203	Peptide chain release factor 2 @ programmed frameshift-containing	2748196	2748942	+	Cytoplasmic			bi (<->)	NC_006348	1740	248	fig|243160.12.peg.1740	BMA1699	prfB	Peptide chain release factor 2 @ programmed frameshift-containing	1	0.996	bi (<->)	LAUA01000017	6277	391	fig|95486.65.peg.6277	WQ49_28715		Peptide chain release factor 2 @ programmed frameshift-containing	0.972	0.632	bi (<->)	NC_010084	1331	248	fig|395019.8.peg.1331	Bmul_1153		Peptide chain release factor 2 @ programmed frameshift-containing	0.996	0.996	bi (<->)	CP104982	1349	300	fig|652611.54.peg.1349
NC_006350	2518	272	fig|272560.6.peg.2518	BPSL2218		PLF_32008_00004257	PGF_00009528	Glycosyl transferase, group 2 family	2662817	2663635	-	Cytoplasmic			bi (<->)	NC_006348	1665	272	fig|243160.12.peg.1665	BMA1624		Glycosyl transferase, group 2 family	0.989	0.996
NC_006350	2526	282	fig|272560.6.peg.2526	BPSL2226		PLF_32008_00003972	PGF_01225543	hypothetical protein	2670822	2671670	-	Cytoplasmic			bi (<->)	NC_006348	1673	282	fig|243160.12.peg.1673			hypothetical protein	0.989	0.996
NC_006351	5912	175	fig|272560.6.peg.5912	BPSS1628		PLF_32008_00062051	PGF_00394507	Type III secretion protein HrpB7	2202263	2202790	+	Cytoplasmic			bi (<->)	NC_006349	5228	175	fig|243160.12.peg.5228			Type III secretion protein HrpB7	0.989	0.994
NC_006350	124	94	fig|272560.6.peg.124	BPSL0112		PLF_32008_00004822	PGF_07749613	hypothetical protein	124499	124783	-	CytoplasmicMembrane			bi (<->)	NC_006348	128	94	fig|243160.12.peg.128			hypothetical protein	0.989	0.989
NC_006351	6208	311	fig|272560.6.peg.6208	BPSS1867		PLF_32008_00003897	PGF_01074321	CAAX amino terminal protease family protein	2536435	2537370	+	CytoplasmicMembrane			bi (<->)	NC_006349	3732	282	fig|243160.12.peg.3732	BMAA0226		CAAX amino terminal protease family protein	0.989	0.996
NC_006350	117	189	fig|272560.6.peg.117	BPSL0106		PLF_32008_00003748	PGF_08225224	hypothetical protein	117179	117748	-	Unknown			bi (<->)	NC_006348	121	189	fig|243160.12.peg.121			hypothetical protein	0.989	0.995
NC_006350	1806	176	fig|272560.6.peg.1806	BPSL1603		PLF_32008_00004091	PGF_03672087	Nitrous oxide reductase maturation protein, outer-membrane lipoprotein NosL	1856981	1857511	-	Unknown			bi (<->)	NC_006348	1030	176	fig|243160.12.peg.1030	BMA0991		Nitrous oxide reductase maturation protein, outer-membrane lipoprotein NosL	0.989	0.994																					bi (<->)	CP104982	1646	178	fig|652611.54.peg.1646
NC_006350	2556	90	fig|272560.6.peg.2556	BPSL2251		PLF_32008_00003881	PGF_08196419	hypothetical protein	2713542	2713814	-	Unknown			bi (<->)	NC_006348	1704	90	fig|243160.12.peg.1704	BMA1665		hypothetical protein	0.989	0.989
NC_006350	2964	90	fig|272560.6.peg.2964	BPSL2599		PLF_32008_00003959	PGF_01074366	hypothetical protein	3118611	3118883	+	Unknown			bi (<->)	NC_006348	2185	90	fig|243160.12.peg.2185	BMA2116		hypothetical protein	0.989	0.989
NC_006351	4549	91	fig|272560.6.peg.4549	BPSS0535		PLF_32008_00004688	PGF_01078069	hypothetical protein	729623	729898	+	Unknown			bi (<->)	NC_006349	3959	91	fig|243160.12.peg.3959			hypothetical protein	0.989	0.989
NC_006351	5783	93	fig|272560.6.peg.5783	BPSS1527	bapB	PLF_32008_00004291	PGF_01075760	hypothetical protein	2079819	2080100	-	Unknown			bi (<->)	NC_006349	5101	93	fig|243160.12.peg.5101	BMAA1525	bapB	hypothetical protein	0.989	0.989
NC_006351	5806	89	fig|272560.6.peg.5806	BPSS1548		PLF_32008_00003978	PGF_01074381	hypothetical protein	2103000	2103269	+	Unknown			bi (<->)	NC_006349	5124	89	fig|243160.12.peg.5124	BMAA1548	bsaL	hypothetical protein	0.989	0.989
NC_006350	3648	60	fig|272560.6.peg.3648	BPSL3195	rpmD	PLF_32008_00001655	PGF_00016395	LSU ribosomal protein L30p (L7e)	3800108	3800290	-	Cytoplasmic			bi (<->)	NC_006348	2685	63	fig|243160.12.peg.2685	BMA2614	rpmD	LSU ribosomal protein L30p (L7e)	1	0.937	bi (<->)	LAUA01000004	2698	60	fig|95486.65.peg.2698	WQ49_12275		LSU ribosomal protein L30p (L7e)	0.983	0.983	bi (<->)	NC_010084	395	60	fig|395019.8.peg.395	Bmul_0267	rpmD	LSU ribosomal protein L30p (L7e)	0.983	0.983	bi (<->)	CP104982	743	58	fig|652611.54.peg.743
NC_006350	2568	400	fig|272560.6.peg.2568	BPSL2260		PLF_32008_00001150	PGF_00062045	Tryptophanyl-tRNA synthetase (EC 6.1.1.2)	2725214	2726416	-	Cytoplasmic			bi (<->)	NC_006348	1717	400	fig|243160.12.peg.1717	BMA1680	trpS-1	Tryptophanyl-tRNA synthetase (EC 6.1.1.2)	1	0.998	bi (<->)	LAUA01000017	6298	400	fig|95486.65.peg.6298	WQ49_28815		Tryptophanyl-tRNA synthetase (EC 6.1.1.2)	0.98	0.998	bi (<->)	NC_010084	1355	400	fig|395019.8.peg.1355	Bmul_1177		Tryptophanyl-tRNA synthetase (EC 6.1.1.2)	0.985	0.998	bi (<->)	CP104982	4825	448	fig|652611.54.peg.4825
NC_006350	3647	144	fig|272560.6.peg.3647	BPSL3194	rplO	PLF_32008_00000645	PGF_00016342	LSU ribosomal protein L15p (L27Ae)	3799645	3800079	-	Cytoplasmic			bi (<->)	NC_006348	2684	144	fig|243160.12.peg.2684	BMA2613	rplO	LSU ribosomal protein L15p (L27Ae)	1	0.993	bi (<->)	LAUA01000004	2697	144	fig|95486.65.peg.2697	WQ49_12270		LSU ribosomal protein L15p (L27Ae)	0.986	0.993	bi (<->)	NC_010084	396	144	fig|395019.8.peg.396	Bmul_0268	rplO	LSU ribosomal protein L15p (L27Ae)	0.979	0.993	bi (<->)	CP104982	744	144	fig|652611.54.peg.744
NC_006350	1325	163	fig|272560.6.peg.1325	BPSL1197	ilvH	PLF_32008_00000348	PGF_00025215	Acetolactate synthase small subunit (EC 2.2.1.6)	1381038	1381529	+	Cytoplasmic			bi (<->)	NC_006348	1883	163	fig|243160.12.peg.1883	BMA1847	ilvH	Acetolactate synthase small subunit (EC 2.2.1.6)	1	0.994	bi (<->)	LAUA01000017	6089	175	fig|95486.65.peg.6089	WQ49_27825		Acetolactate synthase small subunit (EC 2.2.1.6)	0.982	0.926	bi (<->)	NC_010084	1183	175	fig|395019.8.peg.1183	Bmul_1014	ilvH	Acetolactate synthase small subunit (EC 2.2.1.6)	0.982	0.926	bi (<->)	CP104982	5217	163	fig|652611.54.peg.5217
NC_006350	1868	276	fig|272560.6.peg.1868	BPSL1657		PLF_32008_00000001	PGF_09978608	Transposase	1919543	1920373	-	Cytoplasmic			uni (->)	NC_006348	983	277	fig|243160.12.peg.983	BMA0948		Transposase	0.993	0.993	uni (->)	LAUA01000003	1808	286	fig|95486.65.peg.1808	WQ49_08230		Transposase	0.982	0.958	uni (->)	NC_010086	5059	277	fig|395019.8.peg.5059	Bmul_4719		Transposase	0.989	0.989	uni (->)	CP104982	4610	280	fig|652611.54.peg.4610
NC_006350	3255	324	fig|272560.6.peg.3255	BPSL2854	phnJ	PLF_32008_00002657	PGF_00046092	Alpha-D-ribose 1-methylphosphonate 5-phosphate C-P lyase (EC 4.7.1.1)	3416222	3417196	-	Cytoplasmic			bi (<->)	NC_006348	2478	324	fig|243160.12.peg.2478	BMA2403	phnJ	Alpha-D-ribose 1-methylphosphonate 5-phosphate C-P lyase (EC 4.7.1.1)	0.988	0.997																					bi (<->)	CP104982	1665	294	fig|652611.54.peg.1665
NC_006351	6302	169	fig|272560.6.peg.6302	BPSS1942		PLF_32008_00002896	PGF_00044718	Putative transmembrane protein	2629931	2630440	+	Cytoplasmic			bi (<->)	NC_006349	3629	169	fig|243160.12.peg.3629	BMAA0134		Putative transmembrane protein	0.988	0.994																					uni (->)	CP104982	4170	227	fig|652611.54.peg.4170
NC_006350	1539	86	fig|272560.6.peg.1539	BPSL1372		PLF_32008_00003322	PGF_01071764	hypothetical protein	1603053	1603313	-	CytoplasmicMembrane			bi (<->)	NC_006348	817	86	fig|243160.12.peg.817			hypothetical protein	0.988	0.988
NC_006350	2321	162	fig|272560.6.peg.2321	BPSL2057		PLF_32008_00005255	PGF_08225224	hypothetical protein	2463474	2463962	+	Unknown			bi (<->)	NC_006348	875	162	fig|243160.12.peg.875			hypothetical protein	0.988	0.994
NC_006350	2822	425	fig|272560.6.peg.2822	BPSL2474B		PLF_32008_00005909	PGF_01085484	Autotransporter adhesin	2985959	2987236	+	Unknown			bi (<->)	NC_006348	390	425	fig|243160.12.peg.390			Autotransporter adhesin	0.988	0.998
NC_006351	3972	86	fig|272560.6.peg.3972	BPSS0059		PLF_32008_00004649	PGF_00015907	KluA	63800	64060	-	Unknown			bi (<->)	NC_006349	3560	86	fig|243160.12.peg.3560	BMAA0064		KluA	0.988	0.988
NC_006351	4502	199	fig|272560.6.peg.4502	BPSS0494		PLF_32008_00005868	PGF_00361645	hypothetical protein	671929	672528	-	Unknown			bi (<->)	NC_006349	5383	167	fig|243160.12.peg.5383			hypothetical protein	0.988	0.994
NC_006351	4804	261	fig|272560.6.peg.4804	BPSS0740		PLF_32008_00003956	PGF_01074364	hypothetical protein	995453	996238	-	Unknown			bi (<->)	NC_006349	4947	163	fig|243160.12.peg.4947	BMAA1384		hypothetical protein	0.988	0.994
[truncated: 4,657 more rows]
[truncated: 7 more columns]

## Sheet: DeepTMHMM
ref_genome_contig	ref_genome_locus_tag	ref_genome_gene_name	ref_genome_function	PSORTB	Identified by Schell 2011?	Average Sequence Identity (%)	Average Sequence Coverage (%)		DeepTMHMM Predicted Structure	DeepTMHMM Precicted Surface-Exposed Residues
[truncated: 25 more rows]

[truncated: 2 more sheets: Lit Review Curation, Antigenicity Screen]
